# Supplementary material
Source: PubMed Central journal article supplement (PMC6205516)
Supplement: NIHMS958093-supplement.pdf [file NIHMS958093-supplement.pdf]

Supplementary Material for "*Big Data Approach to  
Batch Process Monitoring: Simultaneous Fault  
Detection and Diagnosis Using Nonlinear Support  
Vector Machine-based Feature Selection*"

Melis Onel<sup>1,2</sup>, Chris A. Kieslich<sup>4,1,2</sup>, Yannis A. Guzman<sup>3,1,2</sup>,  
Christodoulos A. Floudas<sup>1,2</sup>, Efstratios N. Pistikopoulos<sup>1,2,\*</sup>

1. Artie McFerrin Department of Chemical Engineering,  
Texas A&M University, College Station, TX 77843, USA

2. Texas A&M Energy Institute,  
Texas A&M University, College Station, TX 77843, USA

3. Department of Chemical and Biological Engineering,  
Princeton University, Princeton, NJ 08544, USA

4. Coulter Department of Biomedical Engineering,  
Georgia Institute of Technology, Atlanta, GA

\* *To whom correspondence should be addressed.* Email: [stratos@tamu.edu](mailto:stratos@tamu.edu)

March 3, 2018

# 1 Supplementary Material

Table S1: Fault & Time-specific Model Performances with respect to the One-step Rolling Time Horizon Approach. The alternative models can be provided upon request.

| Fault No | Sample Bin | Fault Detection Rate | Optimal Feature Subset Size | Model Accuracy | False Alarm Rate | Area Under the Curve |
|----------|------------|----------------------|-----------------------------|----------------|------------------|----------------------|
| 1        | 2          | 0.86                 | 5                           | 0.81           | 0.25             | 0.85                 |
| 1        | 3          | 0.50                 | 10                          | 0.49           | 0.52             | 0.48                 |
| 1        | 4          | 0.62                 | 48                          | 0.59           | 0.43             | 0.63                 |
| 1        | 5          | 0.77                 | 7                           | 0.70           | 0.37             | 0.76                 |
| 1        | 6          | 0.67                 | 38                          | 0.64           | 0.39             | 0.69                 |
| 1        | 7          | 0.65                 | 124                         | 0.55           | 0.56             | 0.56                 |
| 1        | 8          | 0.54                 | 29                          | 0.48           | 0.58             | 0.48                 |
| 1        | 9          | 0.63                 | 28                          | 0.63           | 0.38             | 0.68                 |
| 1        | 10         | 0.62                 | 9                           | 0.56           | 0.50             | 0.59                 |
| 1        | 11         | 0.71                 | 48                          | 0.56           | 0.59             | 0.60                 |
| 1        | 12         | 0.70                 | 1                           | 0.52           | 0.66             | 0.55                 |
| 1        | 13         | 0.67                 | 37                          | 0.58           | 0.51             | 0.62                 |
| 1        | 14         | 0.57                 | 10                          | 0.54           | 0.49             | 0.55                 |
| 1        | 15         | 0.74                 | 2                           | 0.56           | 0.63             | 0.58                 |
| 1        | 16         | 0.57                 | 8                           | 0.55           | 0.46             | 0.56                 |
| 1        | 17         | 0.88                 | 12                          | 0.51           | 0.85             | 0.51                 |
| 1        | 18         | 0.63                 | 33                          | 0.62           | 0.40             | 0.67                 |
| 1        | 19         | 0.51                 | 28                          | 0.49           | 0.54             | 0.47                 |
| 1        | 20         | 0.57                 | 26                          | 0.59           | 0.40             | 0.62                 |
| 1        | 21         | 0.69                 | 30                          | 0.67           | 0.35             | 0.73                 |
| 1        | 22         | 0.68                 | 36                          | 0.68           | 0.33             | 0.75                 |
| 1        | 23         | 0.73                 | 28                          | 0.73           | 0.27             | 0.80                 |

*Continued on next page*

Table S1 – *Continued from previous page*

| <b>Fault No</b> | <b>Sample Bin</b> | <b>Fault Detection Rate</b> | <b>Optimal Feature Subset Size</b> | <b>Model Accuracy</b> | <b>False Alarm Rate</b> | <b>Area Under the Curve</b> |
|-----------------|-------------------|-----------------------------|------------------------------------|-----------------------|-------------------------|-----------------------------|
| 1               | 24                | 0.61                        | 42                                 | 0.67                  | 0.26                    | 0.74                        |
| 1               | 25                | 0.68                        | 44                                 | 0.68                  | 0.32                    | 0.76                        |
| 1               | 26                | 0.72                        | 32                                 | 0.74                  | 0.25                    | 0.82                        |
| 1               | 27                | 0.67                        | 44                                 | 0.69                  | 0.29                    | 0.76                        |
| 1               | 28                | 0.63                        | 38                                 | 0.70                  | 0.23                    | 0.77                        |
| 1               | 29                | 0.67                        | 37                                 | 0.72                  | 0.23                    | 0.80                        |
| 1               | 30                | 0.69                        | 41                                 | 0.71                  | 0.26                    | 0.79                        |
| 1               | 31                | 0.64                        | 57                                 | 0.71                  | 0.22                    | 0.79                        |
| 1               | 32                | 0.61                        | 34                                 | 0.70                  | 0.21                    | 0.77                        |
| 1               | 33                | 0.61                        | 27                                 | 0.73                  | 0.15                    | 0.78                        |
| 1               | 34                | 0.62                        | 40                                 | 0.72                  | 0.18                    | 0.78                        |
| 1               | 35                | 0.54                        | 2                                  | 0.77                  | 0.01                    | 0.83                        |
| 1               | 36                | 0.58                        | 3                                  | 0.79                  | 0.01                    | 0.87                        |
| 1               | 37                | 0.62                        | 23                                 | 0.74                  | 0.14                    | 0.81                        |
| 1               | 38                | 0.62                        | 3                                  | 0.80                  | 0.02                    | 0.86                        |
| 1               | 39                | 0.63                        | 37                                 | 0.74                  | 0.14                    | 0.81                        |
| 1               | 40                | 0.59                        | 2                                  | 0.79                  | 0.01                    | 0.87                        |
| 1               | 41                | 0.61                        | 37                                 | 0.75                  | 0.11                    | 0.81                        |
| 1               | 42                | 0.62                        | 2                                  | 0.80                  | 0.02                    | 0.87                        |
| 1               | 43                | 0.58                        | 2                                  | 0.79                  | 0.01                    | 0.86                        |
| 1               | 44                | 0.60                        | 2                                  | 0.79                  | 0.01                    | 0.86                        |
| 1               | 45                | 0.61                        | 2                                  | 0.80                  | 0.01                    | 0.87                        |
| 1               | 46                | 0.61                        | 2                                  | 0.80                  | 0.01                    | 0.87                        |
| 1               | 47                | 0.62                        | 2                                  | 0.79                  | 0.04                    | 0.86                        |
| 1               | 48                | 0.64                        | 2                                  | 0.81                  | 0.02                    | 0.88                        |
| 1               | 49                | 0.61                        | 7                                  | 0.80                  | 0.00                    | 0.88                        |

*Continued on next page*

Table S1 – *Continued from previous page*

| <b>Fault No</b> | <b>Sample Bin</b> | <b>Fault Detection Rate</b> | <b>Optimal Feature Subset Size</b> | <b>Model Accuracy</b> | <b>False Alarm Rate</b> | <b>Area Under the Curve</b> |
|-----------------|-------------------|-----------------------------|------------------------------------|-----------------------|-------------------------|-----------------------------|
| 1               | 50                | 0.67                        | 2                                  | 0.83                  | 0.01                    | 0.89                        |
| 1               | 51                | 0.65                        | 2                                  | 0.81                  | 0.02                    | 0.88                        |
| 1               | 52                | 0.66                        | 2                                  | 0.82                  | 0.02                    | 0.88                        |
| 1               | 53                | 0.64                        | 3                                  | 0.81                  | 0.02                    | 0.87                        |
| 1               | 54                | 0.61                        | 10                                 | 0.80                  | 0.00                    | 0.88                        |
| 1               | 55                | 0.66                        | 3                                  | 0.82                  | 0.02                    | 0.88                        |
| 1               | 56                | 0.65                        | 3                                  | 0.81                  | 0.03                    | 0.87                        |
| 1               | 57                | 0.68                        | 2                                  | 0.82                  | 0.03                    | 0.89                        |
| 1               | 58                | 0.65                        | 17                                 | 0.83                  | 0.00                    | 0.91                        |
| 1               | 59                | 0.65                        | 3                                  | 0.81                  | 0.03                    | 0.88                        |
| 1               | 60                | 0.66                        | 16                                 | 0.83                  | 0.00                    | 0.91                        |
| 1               | 61                | 0.65                        | 4                                  | 0.82                  | 0.01                    | 0.88                        |
| 1               | 62                | 0.65                        | 20                                 | 0.82                  | 0.00                    | 0.92                        |
| 1               | 63                | 0.66                        | 17                                 | 0.83                  | 0.00                    | 0.93                        |
| 1               | 64                | 0.65                        | 14                                 | 0.82                  | 0.01                    | 0.90                        |
| 1               | 65                | 0.68                        | 16                                 | 0.84                  | 0.00                    | 0.92                        |
| 1               | 66                | 0.66                        | 18                                 | 0.83                  | 0.00                    | 0.93                        |
| 1               | 67                | 0.66                        | 17                                 | 0.83                  | 0.00                    | 0.92                        |
| 1               | 68                | 0.66                        | 17                                 | 0.83                  | 0.00                    | 0.92                        |
| 1               | 69                | 0.64                        | 11                                 | 0.82                  | 0.00                    | 0.92                        |
| 1               | 70                | 0.67                        | 15                                 | 0.83                  | 0.00                    | 0.93                        |
| 1               | 71                | 0.63                        | 17                                 | 0.82                  | 0.00                    | 0.92                        |
| 1               | 72                | 0.63                        | 16                                 | 0.82                  | 0.00                    | 0.93                        |
| 1               | 73                | 0.60                        | 18                                 | 0.80                  | 0.00                    | 0.93                        |
| 1               | 74                | 0.67                        | 21                                 | 0.83                  | 0.00                    | 0.93                        |
| 1               | 75                | 0.67                        | 20                                 | 0.84                  | 0.00                    | 0.92                        |

*Continued on next page*

Table S1 – *Continued from previous page*

| <b>Fault No</b> | <b>Sample Bin</b> | <b>Fault Detection Rate</b> | <b>Optimal Feature Subset Size</b> | <b>Model Accuracy</b> | <b>False Alarm Rate</b> | <b>Area Under the Curve</b> |
|-----------------|-------------------|-----------------------------|------------------------------------|-----------------------|-------------------------|-----------------------------|
| 1               | 76                | 0.69                        | 19                                 | 0.85                  | 0.00                    | 0.93                        |
| 1               | 77                | 0.68                        | 13                                 | 0.84                  | 0.00                    | 0.92                        |
| 1               | 78                | 0.62                        | 14                                 | 0.81                  | 0.00                    | 0.91                        |
| 1               | 79                | 0.68                        | 3                                  | 0.84                  | 0.00                    | 0.91                        |
| 1               | 80                | 0.69                        | 25                                 | 0.84                  | 0.00                    | 0.92                        |
| 1               | 81                | 0.67                        | 23                                 | 0.84                  | 0.00                    | 0.92                        |
| 1               | 82                | 0.67                        | 26                                 | 0.83                  | 0.00                    | 0.91                        |
| 1               | 83                | 0.67                        | 24                                 | 0.84                  | 0.00                    | 0.91                        |
| 1               | 84                | 0.68                        | 11                                 | 0.84                  | 0.00                    | 0.91                        |
| 1               | 85                | 0.68                        | 22                                 | 0.84                  | 0.00                    | 0.91                        |
| 1               | 86                | 0.68                        | 4                                  | 0.84                  | 0.01                    | 0.90                        |
| 1               | 87                | 0.67                        | 19                                 | 0.83                  | 0.01                    | 0.90                        |
| 1               | 88                | 0.66                        | 20                                 | 0.83                  | 0.00                    | 0.94                        |
| 1               | 89                | 0.66                        | 23                                 | 0.83                  | 0.01                    | 0.90                        |
| 1               | 90                | 0.65                        | 25                                 | 0.83                  | 0.00                    | 0.93                        |
| 1               | 91                | 0.66                        | 23                                 | 0.83                  | 0.00                    | 0.94                        |
| 1               | 92                | 0.68                        | 10                                 | 0.84                  | 0.00                    | 0.96                        |
| 1               | 93                | 0.66                        | 13                                 | 0.83                  | 0.00                    | 0.95                        |
| 1               | 94                | 0.67                        | 15                                 | 0.84                  | 0.00                    | 0.95                        |
| 1               | 95                | 0.65                        | 30                                 | 0.82                  | 0.00                    | 0.92                        |
| 1               | 96                | 0.66                        | 32                                 | 0.83                  | 0.00                    | 0.92                        |
| 1               | 97                | 0.66                        | 30                                 | 0.83                  | 0.00                    | 0.91                        |
| 1               | 98                | 0.68                        | 10                                 | 0.84                  | 0.00                    | 0.95                        |
| 1               | 99                | 0.66                        | 27                                 | 0.83                  | 0.00                    | 0.92                        |
| 1               | 100               | 0.67                        | 29                                 | 0.83                  | 0.00                    | 0.92                        |
| 1               | 101               | 0.64                        | 31                                 | 0.82                  | 0.00                    | 0.91                        |

*Continued on next page*

Table S1 – *Continued from previous page*

| <b>Fault No</b> | <b>Sample Bin</b> | <b>Fault Detection Rate</b> | <b>Optimal Feature Subset Size</b> | <b>Model Accuracy</b> | <b>False Alarm Rate</b> | <b>Area Under the Curve</b> |
|-----------------|-------------------|-----------------------------|------------------------------------|-----------------------|-------------------------|-----------------------------|
| 1               | 102               | 0.66                        | 7                                  | 0.83                  | 0.00                    | 0.94                        |
| 1               | 103               | 0.66                        | 7                                  | 0.83                  | 0.00                    | 0.94                        |
| 1               | 104               | 0.64                        | 31                                 | 0.82                  | 0.00                    | 0.90                        |
| 1               | 105               | 0.66                        | 31                                 | 0.83                  | 0.00                    | 0.91                        |
| 1               | 106               | 0.67                        | 30                                 | 0.83                  | 0.00                    | 0.92                        |
| 1               | 107               | 0.68                        | 5                                  | 0.84                  | 0.00                    | 0.95                        |
| 1               | 108               | 0.68                        | 31                                 | 0.84                  | 0.00                    | 0.92                        |
| 1               | 109               | 0.68                        | 6                                  | 0.84                  | 0.00                    | 0.95                        |
| 1               | 110               | 0.69                        | 5                                  | 0.84                  | 0.00                    | 0.95                        |
| 1               | 111               | 0.69                        | 6                                  | 0.84                  | 0.00                    | 0.95                        |
| 1               | 112               | 0.68                        | 6                                  | 0.84                  | 0.00                    | 0.95                        |
| 1               | 113               | 0.69                        | 5                                  | 0.84                  | 0.00                    | 0.95                        |
| 1               | 114               | 0.73                        | 43                                 | 0.79                  | 0.15                    | 0.87                        |
| 1               | 115               | 0.68                        | 31                                 | 0.84                  | 0.00                    | 0.94                        |
| 1               | 116               | 0.68                        | 27                                 | 0.84                  | 0.00                    | 0.93                        |
| 1               | 117               | 0.68                        | 6                                  | 0.84                  | 0.00                    | 0.95                        |
| 1               | 118               | 0.68                        | 34                                 | 0.84                  | 0.00                    | 0.92                        |
| 1               | 119               | 0.68                        | 6                                  | 0.84                  | 0.00                    | 0.92                        |
| 1               | 120               | 0.67                        | 26                                 | 0.84                  | 0.00                    | 0.93                        |
| 2               | 2                 | 0.78                        | 10                                 | 0.73                  | 0.31                    | 0.83                        |
| 2               | 3                 | 0.42                        | 5                                  | 0.49                  | 0.45                    | 0.50                        |
| 2               | 4                 | 0.61                        | 136                                | 0.53                  | 0.55                    | 0.54                        |
| 2               | 5                 | 0.75                        | 1                                  | 0.55                  | 0.65                    | 0.58                        |
| 2               | 6                 | 0.90                        | 138                                | 0.50                  | 0.90                    | 0.46                        |
| 2               | 7                 | 0.67                        | 1                                  | 0.55                  | 0.56                    | 0.58                        |
| 2               | 8                 | 0.59                        | 141                                | 0.55                  | 0.49                    | 0.54                        |

*Continued on next page*

Table S1 – *Continued from previous page*

| <b>Fault No</b> | <b>Sample Bin</b> | <b>Fault Detection Rate</b> | <b>Optimal Feature Subset Size</b> | <b>Model Accuracy</b> | <b>False Alarm Rate</b> | <b>Area Under the Curve</b> |
|-----------------|-------------------|-----------------------------|------------------------------------|-----------------------|-------------------------|-----------------------------|
| 2               | 9                 | 0.72                        | 1                                  | 0.54                  | 0.64                    | 0.67                        |
| 2               | 10                | 0.66                        | 24                                 | 0.65                  | 0.37                    | 0.68                        |
| 2               | 11                | 0.81                        | 122                                | 0.50                  | 0.81                    | 0.51                        |
| 2               | 12                | 0.55                        | 16                                 | 0.53                  | 0.50                    | 0.53                        |
| 2               | 13                | 0.87                        | 22                                 | 0.50                  | 0.87                    | 0.50                        |
| 2               | 14                | 0.68                        | 15                                 | 0.49                  | 0.69                    | 0.49                        |
| 2               | 15                | 0.61                        | 40                                 | 0.61                  | 0.39                    | 0.65                        |
| 2               | 16                | 0.79                        | 99                                 | 0.52                  | 0.76                    | 0.76                        |
| 2               | 17                | 0.60                        | 46                                 | 0.60                  | 0.40                    | 0.64                        |
| 2               | 18                | 0.65                        | 51                                 | 0.64                  | 0.37                    | 0.70                        |
| 2               | 19                | 0.68                        | 43                                 | 0.66                  | 0.35                    | 0.73                        |
| 2               | 20                | 0.67                        | 40                                 | 0.67                  | 0.34                    | 0.73                        |
| 2               | 21                | 0.69                        | 56                                 | 0.68                  | 0.33                    | 0.77                        |
| 2               | 22                | 0.68                        | 35                                 | 0.67                  | 0.34                    | 0.74                        |
| 2               | 23                | 0.68                        | 20                                 | 0.69                  | 0.30                    | 0.75                        |
| 2               | 24                | 0.65                        | 53                                 | 0.71                  | 0.23                    | 0.78                        |
| 2               | 25                | 0.72                        | 34                                 | 0.73                  | 0.25                    | 0.82                        |
| 2               | 26                | 0.68                        | 48                                 | 0.72                  | 0.24                    | 0.80                        |
| 2               | 27                | 0.64                        | 39                                 | 0.74                  | 0.17                    | 0.81                        |
| 2               | 28                | 0.70                        | 30                                 | 0.74                  | 0.22                    | 0.82                        |
| 2               | 29                | 0.65                        | 55                                 | 0.73                  | 0.19                    | 0.80                        |
| 2               | 30                | 0.68                        | 51                                 | 0.73                  | 0.22                    | 0.82                        |
| 2               | 31                | 0.70                        | 31                                 | 0.74                  | 0.22                    | 0.81                        |
| 2               | 32                | 0.66                        | 47                                 | 0.68                  | 0.30                    | 0.75                        |
| 2               | 33                | 0.73                        | 24                                 | 0.78                  | 0.17                    | 0.85                        |
| 2               | 34                | 0.67                        | 52                                 | 0.72                  | 0.23                    | 0.79                        |

*Continued on next page*

Table S1 – *Continued from previous page*

| <b>Fault No</b> | <b>Sample Bin</b> | <b>Fault Detection Rate</b> | <b>Optimal Feature Subset Size</b> | <b>Model Accuracy</b> | <b>False Alarm Rate</b> | <b>Area Under the Curve</b> |
|-----------------|-------------------|-----------------------------|------------------------------------|-----------------------|-------------------------|-----------------------------|
| 2               | 35                | 0.63                        | 29                                 | 0.75                  | 0.13                    | 0.82                        |
| 2               | 36                | 0.70                        | 40                                 | 0.75                  | 0.20                    | 0.83                        |
| 2               | 37                | 0.65                        | 35                                 | 0.75                  | 0.16                    | 0.82                        |
| 2               | 38                | 0.63                        | 44                                 | 0.73                  | 0.18                    | 0.80                        |
| 2               | 39                | 0.68                        | 35                                 | 0.74                  | 0.21                    | 0.81                        |
| 2               | 40                | 0.63                        | 39                                 | 0.73                  | 0.17                    | 0.81                        |
| 2               | 41                | 0.62                        | 50                                 | 0.72                  | 0.17                    | 0.80                        |
| 2               | 42                | 0.66                        | 37                                 | 0.76                  | 0.13                    | 0.83                        |
| 2               | 43                | 0.63                        | 1                                  | 0.80                  | 0.04                    | 0.84                        |
| 2               | 44                | 0.63                        | 4                                  | 0.79                  | 0.05                    | 0.84                        |
| 2               | 45                | 0.65                        | 7                                  | 0.81                  | 0.03                    | 0.84                        |
| 2               | 46                | 0.68                        | 34                                 | 0.74                  | 0.20                    | 0.82                        |
| 2               | 47                | 0.72                        | 28                                 | 0.77                  | 0.17                    | 0.84                        |
| 2               | 48                | 0.69                        | 18                                 | 0.79                  | 0.11                    | 0.85                        |
| 2               | 49                | 0.66                        | 8                                  | 0.82                  | 0.02                    | 0.85                        |
| 2               | 50                | 0.66                        | 6                                  | 0.82                  | 0.03                    | 0.87                        |
| 2               | 51                | 0.65                        | 1                                  | 0.82                  | 0.01                    | 0.87                        |
| 2               | 52                | 0.65                        | 1                                  | 0.82                  | 0.02                    | 0.87                        |
| 2               | 53                | 0.68                        | 26                                 | 0.71                  | 0.27                    | 0.78                        |
| 2               | 54                | 0.69                        | 24                                 | 0.76                  | 0.18                    | 0.83                        |
| 2               | 55                | 0.65                        | 6                                  | 0.82                  | 0.01                    | 0.87                        |
| 2               | 56                | 0.66                        | 1                                  | 0.83                  | 0.01                    | 0.90                        |
| 2               | 57                | 0.67                        | 7                                  | 0.83                  | 0.01                    | 0.89                        |
| 2               | 58                | 0.68                        | 28                                 | 0.72                  | 0.24                    | 0.79                        |
| 2               | 59                | 0.70                        | 9                                  | 0.84                  | 0.01                    | 0.90                        |
| 2               | 60                | 0.66                        | 35                                 | 0.71                  | 0.24                    | 0.78                        |

*Continued on next page*



Table S1 – *Continued from previous page*

| <b>Fault No</b> | <b>Sample Bin</b> | <b>Fault Detection Rate</b> | <b>Optimal Feature Subset Size</b> | <b>Model Accuracy</b> | <b>False Alarm Rate</b> | <b>Area Under the Curve</b> |
|-----------------|-------------------|-----------------------------|------------------------------------|-----------------------|-------------------------|-----------------------------|
| 2               | 61                | 0.67                        | 1                                  | 0.83                  | 0.01                    | 0.92                        |
| 2               | 62                | 0.73                        | 4                                  | 0.84                  | 0.04                    | 0.90                        |
| 2               | 63                | 0.68                        | 7                                  | 0.83                  | 0.02                    | 0.91                        |
| 2               | 64                | 0.75                        | 9                                  | 0.87                  | 0.01                    | 0.92                        |
| 2               | 65                | 0.73                        | 1                                  | 0.86                  | 0.01                    | 0.93                        |
| 2               | 66                | 0.67                        | 1                                  | 0.83                  | 0.01                    | 0.92                        |
| 2               | 67                | 0.74                        | 8                                  | 0.86                  | 0.02                    | 0.92                        |
| 2               | 68                | 0.68                        | 6                                  | 0.84                  | 0.00                    | 0.91                        |
| 2               | 69                | 0.65                        | 7                                  | 0.82                  | 0.00                    | 0.92                        |
| 2               | 70                | 0.67                        | 1                                  | 0.83                  | 0.00                    | 0.94                        |
| 2               | 71                | 0.73                        | 7                                  | 0.86                  | 0.02                    | 0.92                        |
| 2               | 72                | 0.67                        | 1                                  | 0.83                  | 0.00                    | 0.93                        |
| 2               | 73                | 0.67                        | 1                                  | 0.84                  | 0.00                    | 0.94                        |
| 2               | 74                | 0.71                        | 7                                  | 0.84                  | 0.02                    | 0.91                        |
| 2               | 75                | 0.74                        | 9                                  | 0.86                  | 0.01                    | 0.93                        |
| 2               | 76                | 0.74                        | 8                                  | 0.86                  | 0.02                    | 0.93                        |
| 2               | 77                | 0.72                        | 12                                 | 0.85                  | 0.01                    | 0.93                        |
| 2               | 78                | 0.67                        | 1                                  | 0.84                  | 0.00                    | 0.94                        |
| 2               | 79                | 0.69                        | 1                                  | 0.84                  | 0.00                    | 0.93                        |
| 2               | 80                | 0.70                        | 8                                  | 0.84                  | 0.01                    | 0.92                        |
| 2               | 81                | 0.69                        | 1                                  | 0.85                  | 0.00                    | 0.95                        |
| 2               | 82                | 0.67                        | 1                                  | 0.83                  | 0.00                    | 0.94                        |
| 2               | 83                | 0.75                        | 11                                 | 0.87                  | 0.00                    | 0.94                        |
| 2               | 84                | 0.67                        | 28                                 | 0.72                  | 0.22                    | 0.79                        |
| 2               | 85                | 0.75                        | 1                                  | 0.87                  | 0.02                    | 0.94                        |
| 2               | 86                | 0.67                        | 1                                  | 0.84                  | 0.00                    | 0.94                        |

*Continued on next page*

Table S1 – *Continued from previous page*

| <b>Fault No</b> | <b>Sample Bin</b> | <b>Fault Detection Rate</b> | <b>Optimal Feature Subset Size</b> | <b>Model Accuracy</b> | <b>False Alarm Rate</b> | <b>Area Under the Curve</b> |
|-----------------|-------------------|-----------------------------|------------------------------------|-----------------------|-------------------------|-----------------------------|
| 2               | 87                | 0.74                        | 11                                 | 0.86                  | 0.01                    | 0.93                        |
| 2               | 88                | 0.70                        | 9                                  | 0.85                  | 0.00                    | 0.93                        |
| 2               | 89                | 0.72                        | 11                                 | 0.86                  | 0.01                    | 0.93                        |
| 2               | 90                | 0.67                        | 3                                  | 0.83                  | 0.01                    | 0.91                        |
| 2               | 91                | 0.74                        | 7                                  | 0.86                  | 0.02                    | 0.93                        |
| 2               | 92                | 0.67                        | 6                                  | 0.83                  | 0.00                    | 0.91                        |
| 2               | 93                | 0.69                        | 6                                  | 0.84                  | 0.00                    | 0.92                        |
| 2               | 94                | 0.67                        | 1                                  | 0.83                  | 0.00                    | 0.94                        |
| 2               | 95                | 0.72                        | 6                                  | 0.85                  | 0.01                    | 0.92                        |
| 2               | 96                | 0.77                        | 11                                 | 0.88                  | 0.01                    | 0.94                        |
| 2               | 97                | 0.67                        | 1                                  | 0.84                  | 0.00                    | 0.94                        |
| 2               | 98                | 0.72                        | 10                                 | 0.86                  | 0.00                    | 0.94                        |
| 2               | 99                | 0.70                        | 9                                  | 0.85                  | 0.00                    | 0.93                        |
| 2               | 100               | 0.74                        | 11                                 | 0.87                  | 0.00                    | 0.94                        |
| 2               | 101               | 0.66                        | 1                                  | 0.83                  | 0.00                    | 0.94                        |
| 2               | 102               | 0.75                        | 11                                 | 0.87                  | 0.01                    | 0.94                        |
| 2               | 103               | 0.74                        | 10                                 | 0.87                  | 0.00                    | 0.93                        |
| 2               | 104               | 0.70                        | 10                                 | 0.85                  | 0.00                    | 0.94                        |
| 2               | 105               | 0.68                        | 1                                  | 0.84                  | 0.00                    | 0.95                        |
| 2               | 106               | 0.71                        | 8                                  | 0.85                  | 0.00                    | 0.94                        |
| 2               | 107               | 0.70                        | 7                                  | 0.85                  | 0.00                    | 0.93                        |
| 2               | 108               | 0.69                        | 11                                 | 0.85                  | 0.00                    | 0.94                        |
| 2               | 109               | 0.66                        | 1                                  | 0.83                  | 0.00                    | 0.94                        |
| 2               | 110               | 0.71                        | 7                                  | 0.85                  | 0.01                    | 0.93                        |
| 2               | 111               | 0.67                        | 1                                  | 0.84                  | 0.00                    | 0.94                        |
| 2               | 112               | 0.67                        | 1                                  | 0.83                  | 0.00                    | 0.94                        |

*Continued on next page*

Table S1 – *Continued from previous page*

| <b>Fault No</b> | <b>Sample Bin</b> | <b>Fault Detection Rate</b> | <b>Optimal Feature Subset Size</b> | <b>Model Accuracy</b> | <b>False Alarm Rate</b> | <b>Area Under the Curve</b> |
|-----------------|-------------------|-----------------------------|------------------------------------|-----------------------|-------------------------|-----------------------------|
| 2               | 113               | 0.67                        | 1                                  | 0.84                  | 0.00                    | 0.95                        |
| 2               | 114               | 0.75                        | 10                                 | 0.87                  | 0.00                    | 0.93                        |
| 2               | 115               | 0.75                        | 11                                 | 0.87                  | 0.01                    | 0.94                        |
| 2               | 116               | 0.75                        | 9                                  | 0.87                  | 0.01                    | 0.94                        |
| 2               | 117               | 0.77                        | 11                                 | 0.88                  | 0.02                    | 0.94                        |
| 2               | 118               | 0.67                        | 1                                  | 0.84                  | 0.00                    | 0.94                        |
| 2               | 119               | 0.71                        | 10                                 | 0.85                  | 0.00                    | 0.94                        |
| 2               | 120               | 0.66                        | 1                                  | 0.83                  | 0.00                    | 0.95                        |
| 3               | 2                 | 0.99                        | 35                                 | 0.99                  | 0.01                    | 1.00                        |
| 3               | 3                 | 0.95                        | 17                                 | 0.98                  | 0.00                    | 1.00                        |
| 3               | 4                 | 0.94                        | 16                                 | 0.97                  | 0.00                    | 0.99                        |
| 3               | 5                 | 0.99                        | 22                                 | 1.00                  | 0.00                    | 1.00                        |
| 3               | 6                 | 0.94                        | 21                                 | 0.97                  | 0.01                    | 1.00                        |
| 3               | 7                 | 0.96                        | 31                                 | 0.97                  | 0.01                    | 0.99                        |
| 3               | 8                 | 0.87                        | 33                                 | 0.92                  | 0.03                    | 0.97                        |
| 3               | 9                 | 0.92                        | 4                                  | 0.96                  | 0.00                    | 0.99                        |
| 3               | 10                | 0.90                        | 4                                  | 0.95                  | 0.00                    | 0.99                        |
| 3               | 11                | 0.90                        | 17                                 | 0.95                  | 0.00                    | 0.98                        |
| 3               | 12                | 0.94                        | 3                                  | 0.97                  | 0.00                    | 1.00                        |
| 3               | 13                | 0.92                        | 5                                  | 0.96                  | 0.00                    | 0.99                        |
| 3               | 14                | 0.93                        | 36                                 | 0.96                  | 0.01                    | 0.99                        |
| 3               | 15                | 0.94                        | 14                                 | 0.97                  | 0.00                    | 1.00                        |
| 3               | 16                | 0.88                        | 5                                  | 0.94                  | 0.01                    | 0.98                        |
| 3               | 17                | 0.92                        | 22                                 | 0.96                  | 0.01                    | 0.99                        |
| 3               | 18                | 0.90                        | 24                                 | 0.95                  | 0.01                    | 0.98                        |
| 3               | 19                | 0.93                        | 10                                 | 0.96                  | 0.01                    | 0.98                        |

*Continued on next page*

Table S1 – *Continued from previous page*

| <b>Fault No</b> | <b>Sample Bin</b> | <b>Fault Detection Rate</b> | <b>Optimal Feature Subset Size</b> | <b>Model Accuracy</b> | <b>False Alarm Rate</b> | <b>Area Under the Curve</b> |
|-----------------|-------------------|-----------------------------|------------------------------------|-----------------------|-------------------------|-----------------------------|
| 3               | 20                | 0.96                        | 15                                 | 0.98                  | 0.01                    | 1.00                        |
| 3               | 21                | 0.95                        | 9                                  | 0.97                  | 0.01                    | 0.99                        |
| 3               | 22                | 0.94                        | 2                                  | 0.97                  | 0.00                    | 0.99                        |
| 3               | 23                | 0.94                        | 7                                  | 0.97                  | 0.00                    | 0.99                        |
| 3               | 24                | 0.91                        | 1                                  | 0.95                  | 0.00                    | 0.99                        |
| 3               | 25                | 0.95                        | 1                                  | 0.97                  | 0.00                    | 0.98                        |
| 3               | 26                | 0.94                        | 33                                 | 0.96                  | 0.01                    | 0.99                        |
| 3               | 27                | 0.93                        | 22                                 | 0.96                  | 0.01                    | 0.99                        |
| 3               | 28                | 0.96                        | 9                                  | 0.98                  | 0.01                    | 0.99                        |
| 3               | 29                | 0.96                        | 33                                 | 0.98                  | 0.00                    | 0.99                        |
| 3               | 30                | 0.96                        | 10                                 | 0.98                  | 0.01                    | 0.99                        |
| 3               | 31                | 0.96                        | 1                                  | 0.97                  | 0.02                    | 0.99                        |
| 3               | 32                | 0.98                        | 1                                  | 0.98                  | 0.02                    | 1.00                        |
| 3               | 33                | 0.97                        | 10                                 | 0.98                  | 0.02                    | 1.00                        |
| 3               | 34                | 0.97                        | 31                                 | 0.98                  | 0.02                    | 1.00                        |
| 3               | 35                | 0.95                        | 11                                 | 0.97                  | 0.01                    | 0.99                        |
| 3               | 36                | 0.98                        | 8                                  | 0.99                  | 0.01                    | 1.00                        |
| 3               | 37                | 0.96                        | 7                                  | 0.98                  | 0.01                    | 0.99                        |
| 3               | 38                | 0.96                        | 14                                 | 0.98                  | 0.00                    | 0.99                        |
| 3               | 39                | 0.98                        | 12                                 | 0.98                  | 0.02                    | 1.00                        |
| 3               | 40                | 0.96                        | 9                                  | 0.98                  | 0.01                    | 0.99                        |
| 3               | 41                | 0.97                        | 1                                  | 0.98                  | 0.01                    | 1.00                        |
| 3               | 42                | 0.97                        | 1                                  | 0.98                  | 0.01                    | 1.00                        |
| 3               | 43                | 0.97                        | 18                                 | 0.98                  | 0.01                    | 1.00                        |
| 3               | 44                | 0.97                        | 11                                 | 0.98                  | 0.01                    | 1.00                        |
| 3               | 45                | 0.97                        | 13                                 | 0.98                  | 0.01                    | 1.00                        |

*Continued on next page*

Table S1 – *Continued from previous page*

| <b>Fault No</b> | <b>Sample Bin</b> | <b>Fault Detection Rate</b> | <b>Optimal Feature Subset Size</b> | <b>Model Accuracy</b> | <b>False Alarm Rate</b> | <b>Area Under the Curve</b> |
|-----------------|-------------------|-----------------------------|------------------------------------|-----------------------|-------------------------|-----------------------------|
| 3               | 46                | 0.98                        | 1                                  | 0.99                  | 0.00                    | 1.00                        |
| 3               | 47                | 0.97                        | 16                                 | 0.98                  | 0.01                    | 0.99                        |
| 3               | 48                | 0.97                        | 10                                 | 0.98                  | 0.01                    | 1.00                        |
| 3               | 49                | 0.96                        | 15                                 | 0.98                  | 0.01                    | 0.99                        |
| 3               | 50                | 0.97                        | 14                                 | 0.98                  | 0.00                    | 1.00                        |
| 3               | 51                | 0.96                        | 1                                  | 0.98                  | 0.01                    | 1.00                        |
| 3               | 52                | 0.97                        | 10                                 | 0.98                  | 0.00                    | 1.00                        |
| 3               | 53                | 0.96                        | 1                                  | 0.98                  | 0.00                    | 1.00                        |
| 3               | 54                | 0.96                        | 16                                 | 0.97                  | 0.01                    | 0.99                        |
| 3               | 55                | 0.95                        | 10                                 | 0.97                  | 0.01                    | 0.99                        |
| 3               | 56                | 0.97                        | 11                                 | 0.98                  | 0.01                    | 0.99                        |
| 3               | 57                | 0.96                        | 1                                  | 0.98                  | 0.01                    | 1.00                        |
| 3               | 58                | 0.97                        | 16                                 | 0.98                  | 0.00                    | 1.00                        |
| 3               | 59                | 0.97                        | 1                                  | 0.98                  | 0.01                    | 1.00                        |
| 3               | 60                | 0.96                        | 9                                  | 0.98                  | 0.00                    | 0.99                        |
| 3               | 61                | 0.97                        | 1                                  | 0.98                  | 0.01                    | 1.00                        |
| 3               | 62                | 0.97                        | 9                                  | 0.98                  | 0.00                    | 1.00                        |
| 3               | 63                | 0.97                        | 10                                 | 0.98                  | 0.01                    | 1.00                        |
| 3               | 64                | 0.97                        | 10                                 | 0.98                  | 0.00                    | 1.00                        |
| 3               | 65                | 0.97                        | 1                                  | 0.98                  | 0.01                    | 1.00                        |
| 3               | 66                | 0.95                        | 7                                  | 0.97                  | 0.01                    | 0.99                        |
| 3               | 67                | 0.97                        | 1                                  | 0.98                  | 0.01                    | 1.00                        |
| 3               | 68                | 0.97                        | 1                                  | 0.98                  | 0.01                    | 1.00                        |
| 3               | 69                | 0.97                        | 1                                  | 0.98                  | 0.01                    | 1.00                        |
| 3               | 70                | 0.96                        | 1                                  | 0.98                  | 0.01                    | 1.00                        |
| 3               | 71                | 0.97                        | 16                                 | 0.98                  | 0.01                    | 1.00                        |

*Continued on next page*

Table S1 – *Continued from previous page*

| <b>Fault No</b> | <b>Sample Bin</b> | <b>Fault Detection Rate</b> | <b>Optimal Feature Subset Size</b> | <b>Model Accuracy</b> | <b>False Alarm Rate</b> | <b>Area Under the Curve</b> |
|-----------------|-------------------|-----------------------------|------------------------------------|-----------------------|-------------------------|-----------------------------|
| 3               | 72                | 0.96                        | 10                                 | 0.98                  | 0.01                    | 0.99                        |
| 3               | 73                | 0.97                        | 7                                  | 0.98                  | 0.01                    | 1.00                        |
| 3               | 74                | 0.97                        | 1                                  | 0.98                  | 0.00                    | 1.00                        |
| 3               | 75                | 0.98                        | 1                                  | 0.99                  | 0.00                    | 1.00                        |
| 3               | 76                | 0.97                        | 1                                  | 0.98                  | 0.01                    | 1.00                        |
| 3               | 77                | 0.97                        | 1                                  | 0.98                  | 0.01                    | 1.00                        |
| 3               | 78                | 0.97                        | 1                                  | 0.98                  | 0.01                    | 1.00                        |
| 3               | 79                | 0.95                        | 12                                 | 0.97                  | 0.01                    | 1.00                        |
| 3               | 80                | 0.97                        | 7                                  | 0.98                  | 0.00                    | 1.00                        |
| 3               | 81                | 0.97                        | 11                                 | 0.98                  | 0.01                    | 1.00                        |
| 3               | 82                | 0.97                        | 1                                  | 0.98                  | 0.01                    | 1.00                        |
| 3               | 83                | 0.98                        | 1                                  | 0.98                  | 0.01                    | 1.00                        |
| 3               | 84                | 0.97                        | 1                                  | 0.98                  | 0.01                    | 1.00                        |
| 3               | 85                | 0.97                        | 1                                  | 0.98                  | 0.01                    | 1.00                        |
| 3               | 86                | 0.96                        | 1                                  | 0.98                  | 0.00                    | 1.00                        |
| 3               | 87                | 0.97                        | 11                                 | 0.98                  | 0.01                    | 1.00                        |
| 3               | 88                | 0.97                        | 1                                  | 0.98                  | 0.01                    | 1.00                        |
| 3               | 89                | 0.97                        | 1                                  | 0.98                  | 0.00                    | 1.00                        |
| 3               | 90                | 0.96                        | 10                                 | 0.97                  | 0.01                    | 0.99                        |
| 3               | 91                | 0.96                        | 1                                  | 0.98                  | 0.00                    | 1.00                        |
| 3               | 92                | 0.96                        | 1                                  | 0.98                  | 0.01                    | 1.00                        |
| 3               | 93                | 0.96                        | 1                                  | 0.98                  | 0.00                    | 1.00                        |
| 3               | 94                | 0.96                        | 9                                  | 0.98                  | 0.00                    | 1.00                        |
| 3               | 95                | 0.97                        | 13                                 | 0.98                  | 0.01                    | 1.00                        |
| 3               | 96                | 0.96                        | 1                                  | 0.98                  | 0.00                    | 1.00                        |
| 3               | 97                | 0.97                        | 11                                 | 0.98                  | 0.00                    | 1.00                        |

*Continued on next page*

Table S1 – *Continued from previous page*

| <b>Fault No</b> | <b>Sample Bin</b> | <b>Fault Detection Rate</b> | <b>Optimal Feature Subset Size</b> | <b>Model Accuracy</b> | <b>False Alarm Rate</b> | <b>Area Under the Curve</b> |
|-----------------|-------------------|-----------------------------|------------------------------------|-----------------------|-------------------------|-----------------------------|
| 3               | 98                | 0.98                        | 13                                 | 0.99                  | 0.00                    | 1.00                        |
| 3               | 99                | 0.97                        | 12                                 | 0.99                  | 0.00                    | 1.00                        |
| 3               | 100               | 0.96                        | 1                                  | 0.98                  | 0.01                    | 1.00                        |
| 3               | 101               | 0.96                        | 1                                  | 0.98                  | 0.01                    | 1.00                        |
| 3               | 102               | 0.97                        | 11                                 | 0.98                  | 0.01                    | 1.00                        |
| 3               | 103               | 0.96                        | 13                                 | 0.98                  | 0.00                    | 1.00                        |
| 3               | 104               | 0.96                        | 9                                  | 0.98                  | 0.01                    | 1.00                        |
| 3               | 105               | 0.97                        | 11                                 | 0.98                  | 0.00                    | 1.00                        |
| 3               | 106               | 0.98                        | 1                                  | 0.98                  | 0.01                    | 1.00                        |
| 3               | 107               | 0.97                        | 1                                  | 0.98                  | 0.01                    | 1.00                        |
| 3               | 108               | 0.97                        | 12                                 | 0.98                  | 0.00                    | 1.00                        |
| 3               | 109               | 0.97                        | 1                                  | 0.99                  | 0.00                    | 1.00                        |
| 3               | 110               | 0.97                        | 1                                  | 0.98                  | 0.01                    | 1.00                        |
| 3               | 111               | 0.97                        | 1                                  | 0.98                  | 0.01                    | 1.00                        |
| 3               | 112               | 0.97                        | 11                                 | 0.98                  | 0.00                    | 1.00                        |
| 3               | 113               | 0.97                        | 1                                  | 0.98                  | 0.00                    | 1.00                        |
| 3               | 114               | 0.98                        | 1                                  | 0.99                  | 0.00                    | 1.00                        |
| 3               | 115               | 0.96                        | 1                                  | 0.98                  | 0.01                    | 1.00                        |
| 3               | 116               | 0.97                        | 14                                 | 0.99                  | 0.00                    | 1.00                        |
| 3               | 117               | 0.97                        | 1                                  | 0.98                  | 0.01                    | 1.00                        |
| 3               | 118               | 0.97                        | 11                                 | 0.98                  | 0.01                    | 1.00                        |
| 3               | 119               | 0.97                        | 1                                  | 0.98                  | 0.01                    | 1.00                        |
| 3               | 120               | 0.97                        | 11                                 | 0.98                  | 0.01                    | 1.00                        |
| 4               | 2                 | 0.83                        | 51                                 | 0.79                  | 0.25                    | 0.84                        |
| 4               | 3                 | 0.69                        | 23                                 | 0.67                  | 0.34                    | 0.74                        |
| 4               | 4                 | 0.74                        | 19                                 | 0.74                  | 0.26                    | 0.81                        |

*Continued on next page*

Table S1 – *Continued from previous page*

| <b>Fault No</b> | <b>Sample Bin</b> | <b>Fault Detection Rate</b> | <b>Optimal Feature Subset Size</b> | <b>Model Accuracy</b> | <b>False Alarm Rate</b> | <b>Area Under the Curve</b> |
|-----------------|-------------------|-----------------------------|------------------------------------|-----------------------|-------------------------|-----------------------------|
| 4               | 5                 | 0.81                        | 47                                 | 0.78                  | 0.24                    | 0.87                        |
| 4               | 6                 | 0.86                        | 1                                  | 0.62                  | 0.63                    | 0.61                        |
| 4               | 7                 | 0.81                        | 20                                 | 0.81                  | 0.19                    | 0.90                        |
| 4               | 8                 | 0.81                        | 46                                 | 0.83                  | 0.15                    | 0.90                        |
| 4               | 9                 | 0.82                        | 27                                 | 0.84                  | 0.14                    | 0.91                        |
| 4               | 10                | 0.82                        | 62                                 | 0.85                  | 0.12                    | 0.91                        |
| 4               | 11                | 0.82                        | 32                                 | 0.90                  | 0.03                    | 0.96                        |
| 4               | 12                | 0.86                        | 14                                 | 0.91                  | 0.03                    | 0.96                        |
| 4               | 13                | 0.85                        | 31                                 | 0.92                  | 0.02                    | 0.96                        |
| 4               | 14                | 0.90                        | 13                                 | 0.93                  | 0.04                    | 0.97                        |
| 4               | 15                | 0.92                        | 37                                 | 0.96                  | 0.01                    | 0.99                        |
| 4               | 16                | 0.90                        | 40                                 | 0.95                  | 0.01                    | 0.98                        |
| 4               | 17                | 0.93                        | 58                                 | 0.96                  | 0.01                    | 0.99                        |
| 4               | 18                | 0.93                        | 26                                 | 0.96                  | 0.00                    | 0.99                        |
| 4               | 19                | 0.90                        | 14                                 | 0.95                  | 0.00                    | 0.98                        |
| 4               | 20                | 0.91                        | 26                                 | 0.96                  | 0.00                    | 0.98                        |
| 4               | 21                | 0.89                        | 30                                 | 0.93                  | 0.02                    | 0.98                        |
| 4               | 22                | 0.90                        | 53                                 | 0.93                  | 0.05                    | 0.98                        |
| 4               | 23                | 0.89                        | 57                                 | 0.94                  | 0.00                    | 0.98                        |
| 4               | 24                | 0.89                        | 43                                 | 0.94                  | 0.00                    | 0.98                        |
| 4               | 25                | 0.95                        | 38                                 | 0.97                  | 0.02                    | 0.99                        |
| 4               | 26                | 0.92                        | 40                                 | 0.95                  | 0.01                    | 0.99                        |
| 4               | 27                | 0.89                        | 38                                 | 0.95                  | 0.00                    | 0.99                        |
| 4               | 28                | 0.92                        | 42                                 | 0.96                  | 0.01                    | 0.99                        |
| 4               | 29                | 0.92                        | 24                                 | 0.96                  | 0.01                    | 0.99                        |
| 4               | 30                | 0.96                        | 29                                 | 0.97                  | 0.01                    | 0.99                        |

*Continued on next page*



Table S1 – *Continued from previous page*

| <b>Fault No</b> | <b>Sample Bin</b> | <b>Fault Detection Rate</b> | <b>Optimal Feature Subset Size</b> | <b>Model Accuracy</b> | <b>False Alarm Rate</b> | <b>Area Under the Curve</b> |
|-----------------|-------------------|-----------------------------|------------------------------------|-----------------------|-------------------------|-----------------------------|
| 4               | 31                | 0.92                        | 13                                 | 0.95                  | 0.03                    | 0.98                        |
| 4               | 32                | 0.93                        | 34                                 | 0.96                  | 0.01                    | 0.99                        |
| 4               | 33                | 0.94                        | 46                                 | 0.96                  | 0.01                    | 0.99                        |
| 4               | 34                | 0.92                        | 32                                 | 0.95                  | 0.01                    | 0.98                        |
| 4               | 35                | 0.92                        | 14                                 | 0.96                  | 0.01                    | 0.99                        |
| 4               | 36                | 0.93                        | 12                                 | 0.96                  | 0.01                    | 0.99                        |
| 4               | 37                | 0.94                        | 26                                 | 0.96                  | 0.01                    | 0.99                        |
| 4               | 38                | 0.94                        | 25                                 | 0.96                  | 0.01                    | 0.99                        |
| 4               | 39                | 0.95                        | 30                                 | 0.97                  | 0.00                    | 1.00                        |
| 4               | 40                | 0.93                        | 40                                 | 0.96                  | 0.01                    | 0.99                        |
| 4               | 41                | 0.94                        | 25                                 | 0.96                  | 0.01                    | 0.99                        |
| 4               | 42                | 0.93                        | 22                                 | 0.96                  | 0.01                    | 0.99                        |
| 4               | 43                | 0.94                        | 18                                 | 0.97                  | 0.01                    | 0.99                        |
| 4               | 44                | 0.94                        | 20                                 | 0.97                  | 0.01                    | 0.99                        |
| 4               | 45                | 0.95                        | 28                                 | 0.97                  | 0.02                    | 0.99                        |
| 4               | 46                | 0.95                        | 10                                 | 0.96                  | 0.02                    | 0.99                        |
| 4               | 47                | 0.95                        | 16                                 | 0.97                  | 0.00                    | 0.99                        |
| 4               | 48                | 0.93                        | 12                                 | 0.96                  | 0.01                    | 0.99                        |
| 4               | 49                | 0.94                        | 34                                 | 0.97                  | 0.00                    | 0.99                        |
| 4               | 50                | 0.95                        | 32                                 | 0.97                  | 0.01                    | 0.99                        |
| 4               | 51                | 0.95                        | 17                                 | 0.97                  | 0.00                    | 0.99                        |
| 4               | 52                | 0.94                        | 16                                 | 0.97                  | 0.00                    | 0.99                        |
| 4               | 53                | 0.95                        | 12                                 | 0.97                  | 0.01                    | 1.00                        |
| 4               | 54                | 0.95                        | 15                                 | 0.98                  | 0.00                    | 0.99                        |
| 4               | 55                | 0.95                        | 12                                 | 0.97                  | 0.00                    | 0.99                        |
| 4               | 56                | 0.95                        | 21                                 | 0.97                  | 0.01                    | 0.99                        |

*Continued on next page*

Table S1 – *Continued from previous page*

| <b>Fault No</b> | <b>Sample Bin</b> | <b>Fault Detection Rate</b> | <b>Optimal Feature Subset Size</b> | <b>Model Accuracy</b> | <b>False Alarm Rate</b> | <b>Area Under the Curve</b> |
|-----------------|-------------------|-----------------------------|------------------------------------|-----------------------|-------------------------|-----------------------------|
| 4               | 57                | 0.96                        | 12                                 | 0.98                  | 0.00                    | 1.00                        |
| 4               | 58                | 0.95                        | 27                                 | 0.97                  | 0.01                    | 1.00                        |
| 4               | 59                | 0.95                        | 13                                 | 0.98                  | 0.00                    | 1.00                        |
| 4               | 60                | 0.96                        | 20                                 | 0.98                  | 0.00                    | 0.99                        |
| 4               | 61                | 0.94                        | 12                                 | 0.97                  | 0.00                    | 0.99                        |
| 4               | 62                | 0.96                        | 12                                 | 0.98                  | 0.00                    | 0.99                        |
| 4               | 63                | 0.97                        | 12                                 | 0.98                  | 0.01                    | 1.00                        |
| 4               | 64                | 0.95                        | 12                                 | 0.97                  | 0.01                    | 1.00                        |
| 4               | 65                | 0.95                        | 11                                 | 0.97                  | 0.01                    | 0.99                        |
| 4               | 66                | 0.96                        | 12                                 | 0.98                  | 0.01                    | 1.00                        |
| 4               | 67                | 0.96                        | 14                                 | 0.98                  | 0.01                    | 1.00                        |
| 4               | 68                | 0.95                        | 13                                 | 0.98                  | 0.00                    | 1.00                        |
| 4               | 69                | 0.96                        | 16                                 | 0.98                  | 0.00                    | 1.00                        |
| 4               | 70                | 0.96                        | 12                                 | 0.98                  | 0.01                    | 1.00                        |
| 4               | 71                | 0.95                        | 19                                 | 0.97                  | 0.00                    | 0.99                        |
| 4               | 72                | 0.95                        | 14                                 | 0.97                  | 0.00                    | 0.99                        |
| 4               | 73                | 0.97                        | 12                                 | 0.98                  | 0.01                    | 1.00                        |
| 4               | 74                | 0.94                        | 55                                 | 0.97                  | 0.01                    | 0.99                        |
| 4               | 75                | 0.95                        | 12                                 | 0.98                  | 0.00                    | 1.00                        |
| 4               | 76                | 0.95                        | 29                                 | 0.97                  | 0.01                    | 0.99                        |
| 4               | 77                | 0.96                        | 12                                 | 0.98                  | 0.00                    | 1.00                        |
| 4               | 78                | 0.97                        | 12                                 | 0.98                  | 0.00                    | 1.00                        |
| 4               | 79                | 0.97                        | 12                                 | 0.99                  | 0.00                    | 1.00                        |
| 4               | 80                | 0.94                        | 55                                 | 0.96                  | 0.01                    | 0.99                        |
| 4               | 81                | 0.95                        | 12                                 | 0.97                  | 0.00                    | 1.00                        |
| 4               | 82                | 0.95                        | 19                                 | 0.97                  | 0.00                    | 1.00                        |

*Continued on next page*

Table S1 – *Continued from previous page*

| <b>Fault No</b> | <b>Sample Bin</b> | <b>Fault Detection Rate</b> | <b>Optimal Feature Subset Size</b> | <b>Model Accuracy</b> | <b>False Alarm Rate</b> | <b>Area Under the Curve</b> |
|-----------------|-------------------|-----------------------------|------------------------------------|-----------------------|-------------------------|-----------------------------|
| 4               | 83                | 0.94                        | 67                                 | 0.97                  | 0.01                    | 0.99                        |
| 4               | 84                | 0.96                        | 14                                 | 0.98                  | 0.00                    | 0.99                        |
| 4               | 85                | 0.95                        | 12                                 | 0.97                  | 0.00                    | 1.00                        |
| 4               | 86                | 0.96                        | 13                                 | 0.98                  | 0.01                    | 1.00                        |
| 4               | 87                | 0.96                        | 38                                 | 0.98                  | 0.01                    | 1.00                        |
| 4               | 88                | 0.97                        | 13                                 | 0.98                  | 0.00                    | 1.00                        |
| 4               | 89                | 0.95                        | 12                                 | 0.97                  | 0.00                    | 1.00                        |
| 4               | 90                | 0.98                        | 13                                 | 0.99                  | 0.00                    | 1.00                        |
| 4               | 91                | 0.96                        | 16                                 | 0.98                  | 0.00                    | 1.00                        |
| 4               | 92                | 0.93                        | 97                                 | 0.95                  | 0.02                    | 0.99                        |
| 4               | 93                | 0.96                        | 19                                 | 0.98                  | 0.01                    | 1.00                        |
| 4               | 94                | 0.96                        | 12                                 | 0.98                  | 0.01                    | 1.00                        |
| 4               | 95                | 0.95                        | 40                                 | 0.97                  | 0.01                    | 0.99                        |
| 4               | 96                | 0.97                        | 12                                 | 0.98                  | 0.01                    | 1.00                        |
| 4               | 97                | 0.93                        | 56                                 | 0.96                  | 0.01                    | 0.99                        |
| 4               | 98                | 0.96                        | 13                                 | 0.98                  | 0.01                    | 1.00                        |
| 4               | 99                | 0.95                        | 37                                 | 0.97                  | 0.01                    | 0.99                        |
| 4               | 100               | 0.96                        | 27                                 | 0.98                  | 0.01                    | 1.00                        |
| 4               | 101               | 0.96                        | 12                                 | 0.98                  | 0.00                    | 1.00                        |
| 4               | 102               | 0.96                        | 13                                 | 0.98                  | 0.01                    | 1.00                        |
| 4               | 103               | 0.95                        | 13                                 | 0.97                  | 0.00                    | 1.00                        |
| 4               | 104               | 0.96                        | 13                                 | 0.98                  | 0.01                    | 1.00                        |
| 4               | 105               | 0.93                        | 59                                 | 0.96                  | 0.01                    | 0.99                        |
| 4               | 106               | 0.96                        | 12                                 | 0.98                  | 0.00                    | 1.00                        |
| 4               | 107               | 0.96                        | 12                                 | 0.97                  | 0.02                    | 1.00                        |
| 4               | 108               | 0.97                        | 21                                 | 0.98                  | 0.00                    | 1.00                        |

*Continued on next page*

Table S1 – *Continued from previous page*

| <b>Fault No</b> | <b>Sample Bin</b> | <b>Fault Detection Rate</b> | <b>Optimal Feature Subset Size</b> | <b>Model Accuracy</b> | <b>False Alarm Rate</b> | <b>Area Under the Curve</b> |
|-----------------|-------------------|-----------------------------|------------------------------------|-----------------------|-------------------------|-----------------------------|
| 4               | 109               | 0.94                        | 74                                 | 0.96                  | 0.01                    | 0.99                        |
| 4               | 110               | 0.94                        | 90                                 | 0.96                  | 0.02                    | 0.99                        |
| 4               | 111               | 0.97                        | 21                                 | 0.98                  | 0.00                    | 1.00                        |
| 4               | 112               | 0.93                        | 80                                 | 0.96                  | 0.02                    | 0.99                        |
| 4               | 113               | 0.96                        | 21                                 | 0.98                  | 0.01                    | 1.00                        |
| 4               | 114               | 0.97                        | 22                                 | 0.98                  | 0.01                    | 1.00                        |
| 4               | 115               | 0.97                        | 24                                 | 0.98                  | 0.00                    | 1.00                        |
| 4               | 116               | 0.93                        | 88                                 | 0.96                  | 0.02                    | 0.99                        |
| 4               | 117               | 0.97                        | 12                                 | 0.99                  | 0.00                    | 1.00                        |
| 4               | 118               | 0.95                        | 45                                 | 0.97                  | 0.01                    | 1.00                        |
| 4               | 119               | 0.95                        | 35                                 | 0.97                  | 0.01                    | 1.00                        |
| 4               | 120               | 0.93                        | 79                                 | 0.96                  | 0.02                    | 0.99                        |
| 5               | 2                 | 0.78                        | 115                                | 0.60                  | 0.67                    | 0.66                        |
| 5               | 3                 | 0.51                        | 10                                 | 0.50                  | 0.50                    | 0.49                        |
| 5               | 4                 | 0.66                        | 134                                | 0.50                  | 0.66                    | 0.46                        |
| 5               | 5                 | 0.70                        | 140                                | 0.55                  | 0.60                    | 0.58                        |
| 5               | 6                 | 0.79                        | 72                                 | 0.47                  | 0.85                    | 0.43                        |
| 5               | 7                 | 0.71                        | 19                                 | 0.69                  | 0.33                    | 0.76                        |
| 5               | 8                 | 0.73                        | 87                                 | 0.58                  | 0.58                    | 0.61                        |
| 5               | 9                 | 0.67                        | 1                                  | 0.58                  | 0.51                    | 0.61                        |
| 5               | 10                | 0.62                        | 16                                 | 0.64                  | 0.33                    | 0.69                        |
| 5               | 11                | 0.70                        | 24                                 | 0.66                  | 0.38                    | 0.72                        |
| 5               | 12                | 0.94                        | 38                                 | 0.50                  | 0.95                    | 0.56                        |
| 5               | 13                | 0.64                        | 22                                 | 0.64                  | 0.36                    | 0.70                        |
| 5               | 14                | 0.66                        | 40                                 | 0.65                  | 0.37                    | 0.69                        |
| 5               | 15                | 0.55                        | 70                                 | 0.53                  | 0.59                    | 0.53                        |

*Continued on next page*

Table S1 – *Continued from previous page*

| <b>Fault No</b> | <b>Sample Bin</b> | <b>Fault Detection Rate</b> | <b>Optimal Feature Subset Size</b> | <b>Model Accuracy</b> | <b>False Alarm Rate</b> | <b>Area Under the Curve</b> |
|-----------------|-------------------|-----------------------------|------------------------------------|-----------------------|-------------------------|-----------------------------|
| 5               | 16                | 0.68                        | 4                                  | 0.62                  | 0.43                    | 0.65                        |
| 5               | 17                | 0.67                        | 141                                | 0.50                  | 0.67                    | 0.55                        |
| 5               | 18                | 0.84                        | 31                                 | 0.50                  | 0.85                    | 0.48                        |
| 5               | 19                | 0.86                        | 132                                | 0.50                  | 0.85                    | 0.63                        |
| 5               | 20                | 0.60                        | 3                                  | 0.52                  | 0.55                    | 0.53                        |
| 5               | 21                | 0.82                        | 5                                  | 0.91                  | 0.00                    | 0.96                        |
| 5               | 22                | 0.86                        | 5                                  | 0.93                  | 0.01                    | 0.97                        |
| 5               | 23                | 0.83                        | 7                                  | 0.91                  | 0.00                    | 0.96                        |
| 5               | 24                | 0.84                        | 9                                  | 0.92                  | 0.00                    | 0.97                        |
| 5               | 25                | 0.83                        | 9                                  | 0.92                  | 0.00                    | 0.96                        |
| 5               | 26                | 0.84                        | 5                                  | 0.92                  | 0.00                    | 0.93                        |
| 5               | 27                | 0.85                        | 2                                  | 0.93                  | 0.00                    | 0.96                        |
| 5               | 28                | 0.84                        | 1                                  | 0.92                  | 0.00                    | 0.96                        |
| 5               | 29                | 0.81                        | 9                                  | 0.90                  | 0.00                    | 0.96                        |
| 5               | 30                | 0.81                        | 3                                  | 0.91                  | 0.00                    | 0.94                        |
| 5               | 31                | 0.78                        | 5                                  | 0.89                  | 0.00                    | 0.95                        |
| 5               | 32                | 0.78                        | 3                                  | 0.89                  | 0.00                    | 0.94                        |
| 5               | 33                | 0.77                        | 2                                  | 0.89                  | 0.00                    | 0.95                        |
| 5               | 34                | 0.75                        | 1                                  | 0.88                  | 0.00                    | 0.93                        |
| 5               | 35                | 0.77                        | 1                                  | 0.89                  | 0.00                    | 0.95                        |
| 5               | 36                | 0.78                        | 3                                  | 0.89                  | 0.00                    | 0.95                        |
| 5               | 37                | 0.76                        | 4                                  | 0.88                  | 0.00                    | 0.94                        |
| 5               | 38                | 0.74                        | 2                                  | 0.87                  | 0.00                    | 0.93                        |
| 5               | 39                | 0.73                        | 1                                  | 0.87                  | 0.00                    | 0.92                        |
| 5               | 40                | 0.73                        | 4                                  | 0.86                  | 0.00                    | 0.92                        |
| 5               | 41                | 0.70                        | 1                                  | 0.85                  | 0.00                    | 0.92                        |

*Continued on next page*

Table S1 – *Continued from previous page*

| <b>Fault No</b> | <b>Sample Bin</b> | <b>Fault Detection Rate</b> | <b>Optimal Feature Subset Size</b> | <b>Model Accuracy</b> | <b>False Alarm Rate</b> | <b>Area Under the Curve</b> |
|-----------------|-------------------|-----------------------------|------------------------------------|-----------------------|-------------------------|-----------------------------|
| 5               | 42                | 0.70                        | 1                                  | 0.85                  | 0.00                    | 0.91                        |
| 5               | 43                | 0.69                        | 4                                  | 0.84                  | 0.00                    | 0.91                        |
| 5               | 44                | 0.70                        | 1                                  | 0.85                  | 0.00                    | 0.92                        |
| 5               | 45                | 0.71                        | 2                                  | 0.86                  | 0.00                    | 0.91                        |
| 5               | 46                | 0.73                        | 3                                  | 0.86                  | 0.00                    | 0.91                        |
| 5               | 47                | 0.72                        | 1                                  | 0.86                  | 0.00                    | 0.90                        |
| 5               | 48                | 0.72                        | 1                                  | 0.86                  | 0.00                    | 0.90                        |
| 5               | 49                | 0.72                        | 2                                  | 0.86                  | 0.00                    | 0.90                        |
| 5               | 50                | 0.70                        | 2                                  | 0.85                  | 0.00                    | 0.90                        |
| 5               | 51                | 0.69                        | 6                                  | 0.85                  | 0.00                    | 0.90                        |
| 5               | 52                | 0.68                        | 4                                  | 0.84                  | 0.00                    | 0.89                        |
| 5               | 53                | 0.68                        | 1                                  | 0.84                  | 0.00                    | 0.89                        |
| 5               | 54                | 0.68                        | 1                                  | 0.84                  | 0.00                    | 0.89                        |
| 5               | 55                | 0.69                        | 12                                 | 0.85                  | 0.00                    | 0.89                        |
| 5               | 56                | 0.68                        | 8                                  | 0.84                  | 0.00                    | 0.89                        |
| 5               | 57                | 0.70                        | 5                                  | 0.85                  | 0.00                    | 0.89                        |
| 5               | 58                | 0.71                        | 4                                  | 0.86                  | 0.00                    | 0.89                        |
| 5               | 59                | 0.70                        | 9                                  | 0.85                  | 0.00                    | 0.89                        |
| 5               | 60                | 0.70                        | 4                                  | 0.85                  | 0.00                    | 0.88                        |
| 5               | 61                | 0.70                        | 4                                  | 0.85                  | 0.00                    | 0.88                        |
| 5               | 62                | 0.68                        | 109                                | 0.74                  | 0.20                    | 0.81                        |
| 5               | 63                | 0.71                        | 2                                  | 0.85                  | 0.00                    | 0.88                        |
| 5               | 64                | 0.71                        | 2                                  | 0.85                  | 0.00                    | 0.88                        |
| 5               | 65                | 0.70                        | 2                                  | 0.85                  | 0.00                    | 0.87                        |
| 5               | 66                | 0.70                        | 3                                  | 0.85                  | 0.00                    | 0.88                        |
| 5               | 67                | 0.68                        | 1                                  | 0.84                  | 0.00                    | 0.86                        |

*Continued on next page*

Table S1 – *Continued from previous page*

| <b>Fault No</b> | <b>Sample Bin</b> | <b>Fault Detection Rate</b> | <b>Optimal Feature Subset Size</b> | <b>Model Accuracy</b> | <b>False Alarm Rate</b> | <b>Area Under the Curve</b> |
|-----------------|-------------------|-----------------------------|------------------------------------|-----------------------|-------------------------|-----------------------------|
| 5               | 68                | 0.69                        | 5                                  | 0.84                  | 0.00                    | 0.87                        |
| 5               | 69                | 0.69                        | 3                                  | 0.85                  | 0.00                    | 0.87                        |
| 5               | 70                | 0.68                        | 1                                  | 0.84                  | 0.01                    | 0.85                        |
| 5               | 71                | 0.68                        | 2                                  | 0.84                  | 0.00                    | 0.86                        |
| 5               | 72                | 0.68                        | 4                                  | 0.84                  | 0.00                    | 0.86                        |
| 5               | 73                | 0.70                        | 1                                  | 0.85                  | 0.00                    | 0.86                        |
| 5               | 74                | 0.69                        | 3                                  | 0.84                  | 0.00                    | 0.87                        |
| 5               | 75                | 0.69                        | 1                                  | 0.84                  | 0.01                    | 0.86                        |
| 5               | 76                | 0.68                        | 2                                  | 0.84                  | 0.00                    | 0.85                        |
| 5               | 77                | 0.69                        | 3                                  | 0.84                  | 0.00                    | 0.87                        |
| 5               | 78                | 0.68                        | 3                                  | 0.84                  | 0.00                    | 0.85                        |
| 5               | 79                | 0.68                        | 2                                  | 0.84                  | 0.00                    | 0.86                        |
| 5               | 80                | 0.68                        | 2                                  | 0.84                  | 0.00                    | 0.87                        |
| 5               | 81                | 0.69                        | 4                                  | 0.84                  | 0.00                    | 0.86                        |
| 5               | 82                | 0.70                        | 3                                  | 0.85                  | 0.00                    | 0.87                        |
| 5               | 83                | 0.70                        | 3                                  | 0.85                  | 0.00                    | 0.86                        |
| 5               | 84                | 0.71                        | 5                                  | 0.86                  | 0.00                    | 0.88                        |
| 5               | 85                | 0.72                        | 2                                  | 0.86                  | 0.00                    | 0.87                        |
| 5               | 86                | 0.74                        | 2                                  | 0.87                  | 0.00                    | 0.89                        |
| 5               | 87                | 0.74                        | 6                                  | 0.87                  | 0.00                    | 0.88                        |
| 5               | 88                | 0.76                        | 2                                  | 0.88                  | 0.00                    | 0.90                        |
| 5               | 89                | 0.75                        | 3                                  | 0.88                  | 0.00                    | 0.89                        |
| 5               | 90                | 0.77                        | 3                                  | 0.89                  | 0.00                    | 0.91                        |
| 5               | 91                | 0.79                        | 3                                  | 0.89                  | 0.00                    | 0.91                        |
| 5               | 92                | 0.80                        | 3                                  | 0.90                  | 0.00                    | 0.92                        |
| 5               | 93                | 0.80                        | 1                                  | 0.90                  | 0.01                    | 0.91                        |

*Continued on next page*

Table S1 – *Continued from previous page*

| <b>Fault No</b> | <b>Sample Bin</b> | <b>Fault Detection Rate</b> | <b>Optimal Feature Subset Size</b> | <b>Model Accuracy</b> | <b>False Alarm Rate</b> | <b>Area Under the Curve</b> |
|-----------------|-------------------|-----------------------------|------------------------------------|-----------------------|-------------------------|-----------------------------|
| 5               | 94                | 0.82                        | 1                                  | 0.90                  | 0.01                    | 0.93                        |
| 5               | 95                | 0.82                        | 3                                  | 0.91                  | 0.00                    | 0.92                        |
| 5               | 96                | 0.83                        | 2                                  | 0.92                  | 0.00                    | 0.93                        |
| 5               | 97                | 0.83                        | 3                                  | 0.91                  | 0.01                    | 0.93                        |
| 5               | 98                | 0.84                        | 1                                  | 0.92                  | 0.01                    | 0.94                        |
| 5               | 99                | 0.85                        | 3                                  | 0.92                  | 0.01                    | 0.95                        |
| 5               | 100               | 0.87                        | 3                                  | 0.93                  | 0.00                    | 0.95                        |
| 5               | 101               | 0.89                        | 3                                  | 0.94                  | 0.01                    | 0.96                        |
| 5               | 102               | 0.89                        | 1                                  | 0.94                  | 0.01                    | 0.97                        |
| 5               | 103               | 0.90                        | 3                                  | 0.94                  | 0.01                    | 0.97                        |
| 5               | 104               | 0.91                        | 1                                  | 0.95                  | 0.01                    | 0.97                        |
| 5               | 105               | 0.92                        | 4                                  | 0.96                  | 0.00                    | 0.98                        |
| 5               | 106               | 0.92                        | 5                                  | 0.96                  | 0.00                    | 0.98                        |
| 5               | 107               | 0.93                        | 5                                  | 0.96                  | 0.00                    | 0.99                        |
| 5               | 108               | 0.94                        | 6                                  | 0.97                  | 0.00                    | 1.00                        |
| 5               | 109               | 0.93                        | 6                                  | 0.96                  | 0.00                    | 0.99                        |
| 5               | 110               | 0.95                        | 4                                  | 0.97                  | 0.00                    | 1.00                        |
| 5               | 111               | 0.95                        | 6                                  | 0.97                  | 0.00                    | 1.00                        |
| 5               | 112               | 0.96                        | 6                                  | 0.98                  | 0.00                    | 1.00                        |
| 5               | 113               | 0.97                        | 4                                  | 0.98                  | 0.00                    | 1.00                        |
| 5               | 114               | 0.97                        | 3                                  | 0.98                  | 0.00                    | 1.00                        |
| 5               | 115               | 0.97                        | 6                                  | 0.98                  | 0.00                    | 1.00                        |
| 5               | 116               | 0.98                        | 5                                  | 0.99                  | 0.00                    | 1.00                        |
| 5               | 117               | 0.97                        | 4                                  | 0.99                  | 0.00                    | 1.00                        |
| 5               | 118               | 0.97                        | 7                                  | 0.99                  | 0.00                    | 1.00                        |
| 5               | 119               | 0.98                        | 5                                  | 0.99                  | 0.00                    | 1.00                        |

*Continued on next page*



Table S1 – *Continued from previous page*

| <b>Fault No</b> | <b>Sample Bin</b> | <b>Fault Detection Rate</b> | <b>Optimal Feature Subset Size</b> | <b>Model Accuracy</b> | <b>False Alarm Rate</b> | <b>Area Under the Curve</b> |
|-----------------|-------------------|-----------------------------|------------------------------------|-----------------------|-------------------------|-----------------------------|
| 5               | 120               | 0.98                        | 3                                  | 0.99                  | 0.00                    | 1.00                        |
| 6               | 2                 | 0.85                        | 13                                 | 0.49                  | 0.87                    | 0.70                        |
| 6               | 3                 | 0.69                        | 43                                 | 0.67                  | 0.34                    | 0.72                        |
| 6               | 4                 | 0.59                        | 16                                 | 0.51                  | 0.56                    | 0.51                        |
| 6               | 5                 | 0.70                        | 68                                 | 0.68                  | 0.34                    | 0.73                        |
| 6               | 6                 | 0.85                        | 50                                 | 0.49                  | 0.88                    | 0.43                        |
| 6               | 7                 | 0.59                        | 15                                 | 0.66                  | 0.26                    | 0.71                        |
| 6               | 8                 | 0.67                        | 22                                 | 0.67                  | 0.33                    | 0.73                        |
| 6               | 9                 | 0.82                        | 85                                 | 0.62                  | 0.58                    | 0.67                        |
| 6               | 10                | 0.48                        | 2                                  | 0.63                  | 0.21                    | 0.66                        |
| 6               | 11                | 0.58                        | 44                                 | 0.65                  | 0.28                    | 0.74                        |
| 6               | 12                | 0.78                        | 103                                | 0.61                  | 0.57                    | 0.65                        |
| 6               | 13                | 0.67                        | 37                                 | 0.67                  | 0.33                    | 0.75                        |
| 6               | 14                | 0.66                        | 53                                 | 0.66                  | 0.34                    | 0.73                        |
| 6               | 15                | 0.64                        | 80                                 | 0.66                  | 0.32                    | 0.72                        |
| 6               | 16                | 0.66                        | 32                                 | 0.67                  | 0.33                    | 0.74                        |
| 6               | 17                | 0.72                        | 49                                 | 0.71                  | 0.29                    | 0.79                        |
| 6               | 18                | 0.52                        | 36                                 | 0.67                  | 0.17                    | 0.74                        |
| 6               | 19                | 0.68                        | 32                                 | 0.67                  | 0.35                    | 0.74                        |
| 6               | 20                | 0.59                        | 26                                 | 0.70                  | 0.19                    | 0.77                        |
| 6               | 21                | 0.66                        | 5                                  | 0.80                  | 0.05                    | 0.84                        |
| 6               | 22                | 0.67                        | 31                                 | 0.76                  | 0.15                    | 0.83                        |
| 6               | 23                | 0.66                        | 8                                  | 0.81                  | 0.03                    | 0.88                        |
| 6               | 24                | 0.67                        | 3                                  | 0.82                  | 0.02                    | 0.88                        |
| 6               | 25                | 0.65                        | 4                                  | 0.82                  | 0.01                    | 0.90                        |
| 6               | 26                | 0.70                        | 25                                 | 0.72                  | 0.26                    | 0.79                        |

*Continued on next page*

Table S1 – *Continued from previous page*

| <b>Fault No</b> | <b>Sample Bin</b> | <b>Fault Detection Rate</b> | <b>Optimal Feature Subset Size</b> | <b>Model Accuracy</b> | <b>False Alarm Rate</b> | <b>Area Under the Curve</b> |
|-----------------|-------------------|-----------------------------|------------------------------------|-----------------------|-------------------------|-----------------------------|
| 6               | 27                | 0.67                        | 31                                 | 0.69                  | 0.30                    | 0.76                        |
| 6               | 28                | 0.66                        | 1                                  | 0.83                  | 0.00                    | 0.93                        |
| 6               | 29                | 0.71                        | 5                                  | 0.86                  | 0.00                    | 0.92                        |
| 6               | 30                | 0.67                        | 32                                 | 0.70                  | 0.28                    | 0.77                        |
| 6               | 31                | 0.69                        | 2                                  | 0.85                  | 0.00                    | 0.91                        |
| 6               | 32                | 0.60                        | 3                                  | 0.80                  | 0.00                    | 0.89                        |
| 6               | 33                | 0.65                        | 32                                 | 0.65                  | 0.35                    | 0.72                        |
| 6               | 34                | 0.63                        | 10                                 | 0.82                  | 0.00                    | 0.92                        |
| 6               | 35                | 0.63                        | 5                                  | 0.82                  | 0.00                    | 0.92                        |
| 6               | 36                | 0.68                        | 4                                  | 0.84                  | 0.00                    | 0.91                        |
| 6               | 37                | 0.62                        | 1                                  | 0.81                  | 0.00                    | 0.91                        |
| 6               | 38                | 0.65                        | 9                                  | 0.82                  | 0.00                    | 0.93                        |
| 6               | 39                | 0.67                        | 6                                  | 0.83                  | 0.00                    | 0.93                        |
| 6               | 40                | 0.68                        | 3                                  | 0.84                  | 0.00                    | 0.94                        |
| 6               | 41                | 0.69                        | 1                                  | 0.84                  | 0.00                    | 0.92                        |
| 6               | 42                | 0.62                        | 3                                  | 0.81                  | 0.00                    | 0.94                        |
| 6               | 43                | 0.68                        | 5                                  | 0.84                  | 0.00                    | 0.94                        |
| 6               | 44                | 0.70                        | 3                                  | 0.85                  | 0.00                    | 0.95                        |
| 6               | 45                | 0.74                        | 2                                  | 0.87                  | 0.00                    | 0.93                        |
| 6               | 46                | 0.65                        | 39                                 | 0.66                  | 0.32                    | 0.73                        |
| 6               | 47                | 0.62                        | 1                                  | 0.81                  | 0.00                    | 0.93                        |
| 6               | 48                | 0.67                        | 3                                  | 0.84                  | 0.00                    | 0.94                        |
| 6               | 49                | 0.61                        | 5                                  | 0.81                  | 0.00                    | 0.94                        |
| 6               | 50                | 0.66                        | 5                                  | 0.83                  | 0.00                    | 0.94                        |
| 6               | 51                | 0.66                        | 2                                  | 0.83                  | 0.00                    | 0.93                        |
| 6               | 52                | 0.62                        | 3                                  | 0.81                  | 0.00                    | 0.93                        |

*Continued on next page*

Table S1 – *Continued from previous page*

| <b>Fault No</b> | <b>Sample Bin</b> | <b>Fault Detection Rate</b> | <b>Optimal Feature Subset Size</b> | <b>Model Accuracy</b> | <b>False Alarm Rate</b> | <b>Area Under the Curve</b> |
|-----------------|-------------------|-----------------------------|------------------------------------|-----------------------|-------------------------|-----------------------------|
| 6               | 53                | 0.65                        | 2                                  | 0.82                  | 0.00                    | 0.93                        |
| 6               | 54                | 0.59                        | 24                                 | 0.64                  | 0.31                    | 0.70                        |
| 6               | 55                | 0.65                        | 1                                  | 0.82                  | 0.00                    | 0.93                        |
| 6               | 56                | 0.65                        | 2                                  | 0.83                  | 0.00                    | 0.94                        |
| 6               | 57                | 0.60                        | 1                                  | 0.80                  | 0.00                    | 0.94                        |
| 6               | 58                | 0.64                        | 3                                  | 0.82                  | 0.00                    | 0.94                        |
| 6               | 59                | 0.73                        | 2                                  | 0.86                  | 0.00                    | 0.93                        |
| 6               | 60                | 0.50                        | 3                                  | 0.75                  | 0.00                    | 0.94                        |
| 6               | 61                | 0.66                        | 3                                  | 0.83                  | 0.00                    | 0.95                        |
| 6               | 62                | 0.66                        | 1                                  | 0.83                  | 0.00                    | 0.94                        |
| 6               | 63                | 0.74                        | 2                                  | 0.87                  | 0.00                    | 0.95                        |
| 6               | 64                | 0.68                        | 5                                  | 0.84                  | 0.01                    | 0.94                        |
| 6               | 65                | 0.61                        | 58                                 | 0.63                  | 0.35                    | 0.68                        |
| 6               | 66                | 0.74                        | 2                                  | 0.87                  | 0.00                    | 0.95                        |
| 6               | 67                | 0.65                        | 2                                  | 0.83                  | 0.00                    | 0.95                        |
| 6               | 68                | 0.65                        | 2                                  | 0.83                  | 0.00                    | 0.94                        |
| 6               | 69                | 0.65                        | 2                                  | 0.83                  | 0.00                    | 0.95                        |
| 6               | 70                | 0.65                        | 1                                  | 0.82                  | 0.00                    | 0.94                        |
| 6               | 71                | 0.65                        | 2                                  | 0.83                  | 0.00                    | 0.95                        |
| 6               | 72                | 0.65                        | 1                                  | 0.82                  | 0.00                    | 0.94                        |
| 6               | 73                | 0.73                        | 2                                  | 0.86                  | 0.00                    | 0.94                        |
| 6               | 74                | 0.64                        | 2                                  | 0.82                  | 0.00                    | 0.95                        |
| 6               | 75                | 0.71                        | 2                                  | 0.85                  | 0.00                    | 0.95                        |
| 6               | 76                | 0.63                        | 3                                  | 0.81                  | 0.00                    | 0.95                        |
| 6               | 77                | 0.60                        | 31                                 | 0.61                  | 0.38                    | 0.66                        |
| 6               | 78                | 0.60                        | 1                                  | 0.80                  | 0.00                    | 0.95                        |

*Continued on next page*

Table S1 – *Continued from previous page*

| <b>Fault No</b> | <b>Sample Bin</b> | <b>Fault Detection Rate</b> | <b>Optimal Feature Subset Size</b> | <b>Model Accuracy</b> | <b>False Alarm Rate</b> | <b>Area Under the Curve</b> |
|-----------------|-------------------|-----------------------------|------------------------------------|-----------------------|-------------------------|-----------------------------|
| 6               | 79                | 0.62                        | 4                                  | 0.81                  | 0.00                    | 0.96                        |
| 6               | 80                | 0.62                        | 1                                  | 0.81                  | 0.00                    | 0.95                        |
| 6               | 81                | 0.72                        | 9                                  | 0.86                  | 0.00                    | 0.96                        |
| 6               | 82                | 0.62                        | 1                                  | 0.81                  | 0.00                    | 0.95                        |
| 6               | 83                | 0.62                        | 4                                  | 0.81                  | 0.00                    | 0.95                        |
| 6               | 84                | 0.73                        | 1                                  | 0.87                  | 0.00                    | 0.95                        |
| 6               | 85                | 0.74                        | 1                                  | 0.87                  | 0.00                    | 0.96                        |
| 6               | 86                | 0.63                        | 1                                  | 0.82                  | 0.00                    | 0.96                        |
| 6               | 87                | 0.74                        | 2                                  | 0.87                  | 0.00                    | 0.97                        |
| 6               | 88                | 0.62                        | 1                                  | 0.81                  | 0.00                    | 0.96                        |
| 6               | 89                | 0.62                        | 1                                  | 0.81                  | 0.00                    | 0.96                        |
| 6               | 90                | 0.63                        | 1                                  | 0.81                  | 0.00                    | 0.96                        |
| 6               | 91                | 0.62                        | 2                                  | 0.81                  | 0.00                    | 0.97                        |
| 6               | 92                | 0.62                        | 1                                  | 0.81                  | 0.00                    | 0.96                        |
| 6               | 93                | 0.63                        | 3                                  | 0.81                  | 0.00                    | 0.96                        |
| 6               | 94                | 0.64                        | 1                                  | 0.82                  | 0.00                    | 0.96                        |
| 6               | 95                | 0.63                        | 4                                  | 0.81                  | 0.00                    | 0.97                        |
| 6               | 96                | 0.63                        | 1                                  | 0.82                  | 0.00                    | 0.96                        |
| 6               | 97                | 0.62                        | 2                                  | 0.81                  | 0.00                    | 0.97                        |
| 6               | 98                | 0.67                        | 6                                  | 0.84                  | 0.00                    | 0.95                        |
| 6               | 99                | 0.63                        | 1                                  | 0.82                  | 0.00                    | 0.96                        |
| 6               | 100               | 0.62                        | 1                                  | 0.81                  | 0.00                    | 0.96                        |
| 6               | 101               | 0.58                        | 1                                  | 0.79                  | 0.00                    | 0.96                        |
| 6               | 102               | 0.63                        | 2                                  | 0.81                  | 0.00                    | 0.97                        |
| 6               | 103               | 0.68                        | 1                                  | 0.84                  | 0.00                    | 0.97                        |
| 6               | 104               | 0.64                        | 1                                  | 0.82                  | 0.00                    | 0.96                        |

*Continued on next page*

Table S1 – *Continued from previous page*

| <b>Fault No</b> | <b>Sample Bin</b> | <b>Fault Detection Rate</b> | <b>Optimal Feature Subset Size</b> | <b>Model Accuracy</b> | <b>False Alarm Rate</b> | <b>Area Under the Curve</b> |
|-----------------|-------------------|-----------------------------|------------------------------------|-----------------------|-------------------------|-----------------------------|
| 6               | 105               | 0.62                        | 2                                  | 0.81                  | 0.00                    | 0.97                        |
| 6               | 106               | 0.69                        | 1                                  | 0.84                  | 0.00                    | 0.97                        |
| 6               | 107               | 0.62                        | 2                                  | 0.81                  | 0.00                    | 0.97                        |
| 6               | 108               | 0.60                        | 2                                  | 0.80                  | 0.00                    | 0.98                        |
| 6               | 109               | 0.64                        | 1                                  | 0.82                  | 0.00                    | 0.98                        |
| 6               | 110               | 0.66                        | 2                                  | 0.83                  | 0.00                    | 0.98                        |
| 6               | 111               | 0.70                        | 1                                  | 0.85                  | 0.00                    | 0.98                        |
| 6               | 112               | 0.71                        | 5                                  | 0.85                  | 0.00                    | 0.99                        |
| 6               | 113               | 0.65                        | 1                                  | 0.83                  | 0.00                    | 0.99                        |
| 6               | 114               | 0.71                        | 1                                  | 0.86                  | 0.00                    | 0.99                        |
| 6               | 115               | 0.78                        | 2                                  | 0.89                  | 0.00                    | 0.99                        |
| 6               | 116               | 0.66                        | 2                                  | 0.83                  | 0.00                    | 0.99                        |
| 6               | 117               | 0.67                        | 1                                  | 0.84                  | 0.00                    | 0.99                        |
| 6               | 118               | 0.73                        | 1                                  | 0.86                  | 0.00                    | 1.00                        |
| 6               | 119               | 0.68                        | 1                                  | 0.84                  | 0.00                    | 0.99                        |
| 6               | 120               | 0.67                        | 1                                  | 0.84                  | 0.00                    | 0.99                        |
| 7               | 2                 | 1.00                        | 1                                  | 1.00                  | 0.00                    | 1.00                        |
| 7               | 3                 | 1.00                        | 1                                  | 1.00                  | 0.00                    | 1.00                        |
| 7               | 4                 | 0.93                        | 2                                  | 0.96                  | 0.00                    | 0.99                        |
| 7               | 5                 | 0.90                        | 11                                 | 0.95                  | 0.00                    | 0.97                        |
| 7               | 6                 | 0.89                        | 1                                  | 0.94                  | 0.00                    | 0.98                        |
| 7               | 7                 | 0.83                        | 1                                  | 0.92                  | 0.00                    | 0.99                        |
| 7               | 8                 | 0.90                        | 2                                  | 0.95                  | 0.00                    | 0.99                        |
| 7               | 9                 | 0.84                        | 10                                 | 0.92                  | 0.00                    | 0.98                        |
| 7               | 10                | 0.90                        | 1                                  | 0.95                  | 0.00                    | 0.99                        |
| 7               | 11                | 0.85                        | 5                                  | 0.93                  | 0.00                    | 0.97                        |

*Continued on next page*

Table S1 – *Continued from previous page*

| <b>Fault No</b> | <b>Sample Bin</b> | <b>Fault Detection Rate</b> | <b>Optimal Feature Subset Size</b> | <b>Model Accuracy</b> | <b>False Alarm Rate</b> | <b>Area Under the Curve</b> |
|-----------------|-------------------|-----------------------------|------------------------------------|-----------------------|-------------------------|-----------------------------|
| 7               | 12                | 0.97                        | 1                                  | 0.99                  | 0.00                    | 1.00                        |
| 7               | 13                | 0.86                        | 2                                  | 0.93                  | 0.00                    | 0.98                        |
| 7               | 14                | 0.95                        | 1                                  | 0.98                  | 0.00                    | 0.98                        |
| 7               | 15                | 0.98                        | 1                                  | 0.99                  | 0.00                    | 0.99                        |
| 7               | 16                | 0.97                        | 1                                  | 0.99                  | 0.00                    | 0.99                        |
| 7               | 17                | 0.97                        | 1                                  | 0.99                  | 0.00                    | 0.99                        |
| 7               | 18                | 0.97                        | 1                                  | 0.98                  | 0.00                    | 0.99                        |
| 7               | 19                | 0.99                        | 2                                  | 0.99                  | 0.00                    | 0.99                        |
| 7               | 20                | 0.98                        | 1                                  | 0.99                  | 0.00                    | 1.00                        |
| 7               | 21                | 0.97                        | 1                                  | 0.99                  | 0.00                    | 0.99                        |
| 7               | 22                | 0.98                        | 1                                  | 0.99                  | 0.00                    | 0.99                        |
| 7               | 23                | 0.98                        | 2                                  | 0.99                  | 0.00                    | 1.00                        |
| 7               | 24                | 0.98                        | 2                                  | 0.99                  | 0.00                    | 0.99                        |
| 7               | 25                | 0.98                        | 2                                  | 0.99                  | 0.00                    | 1.00                        |
| 7               | 26                | 0.99                        | 2                                  | 0.99                  | 0.00                    | 1.00                        |
| 7               | 27                | 0.99                        | 4                                  | 0.99                  | 0.00                    | 0.99                        |
| 7               | 28                | 0.97                        | 2                                  | 0.99                  | 0.00                    | 0.99                        |
| 7               | 29                | 1.00                        | 3                                  | 1.00                  | 0.00                    | 1.00                        |
| 7               | 30                | 0.99                        | 1                                  | 1.00                  | 0.00                    | 1.00                        |
| 7               | 31                | 0.99                        | 4                                  | 0.99                  | 0.00                    | 1.00                        |
| 7               | 32                | 0.98                        | 2                                  | 0.99                  | 0.00                    | 0.99                        |
| 7               | 33                | 0.98                        | 4                                  | 0.99                  | 0.00                    | 0.99                        |
| 7               | 34                | 0.99                        | 2                                  | 1.00                  | 0.00                    | 1.00                        |
| 7               | 35                | 1.00                        | 4                                  | 1.00                  | 0.00                    | 1.00                        |
| 7               | 36                | 0.99                        | 3                                  | 1.00                  | 0.00                    | 1.00                        |
| 7               | 37                | 0.98                        | 1                                  | 0.99                  | 0.00                    | 0.99                        |

*Continued on next page*

Table S1 – *Continued from previous page*

| <b>Fault No</b> | <b>Sample Bin</b> | <b>Fault Detection Rate</b> | <b>Optimal Feature Subset Size</b> | <b>Model Accuracy</b> | <b>False Alarm Rate</b> | <b>Area Under the Curve</b> |
|-----------------|-------------------|-----------------------------|------------------------------------|-----------------------|-------------------------|-----------------------------|
| 7               | 38                | 1.00                        | 2                                  | 1.00                  | 0.00                    | 1.00                        |
| 7               | 39                | 0.99                        | 4                                  | 1.00                  | 0.00                    | 1.00                        |
| 7               | 40                | 0.98                        | 1                                  | 0.99                  | 0.00                    | 0.99                        |
| 7               | 41                | 0.97                        | 7                                  | 0.98                  | 0.00                    | 1.00                        |
| 7               | 42                | 0.99                        | 3                                  | 1.00                  | 0.00                    | 1.00                        |
| 7               | 43                | 0.97                        | 6                                  | 0.98                  | 0.00                    | 1.00                        |
| 7               | 44                | 0.99                        | 2                                  | 0.99                  | 0.00                    | 0.99                        |
| 7               | 45                | 0.98                        | 6                                  | 0.99                  | 0.00                    | 1.00                        |
| 7               | 46                | 0.99                        | 2                                  | 0.99                  | 0.00                    | 0.99                        |
| 7               | 47                | 0.96                        | 9                                  | 0.98                  | 0.00                    | 0.99                        |
| 7               | 48                | 0.99                        | 1                                  | 1.00                  | 0.00                    | 1.00                        |
| 7               | 49                | 0.99                        | 2                                  | 0.99                  | 0.00                    | 0.99                        |
| 7               | 50                | 0.99                        | 1                                  | 1.00                  | 0.00                    | 0.99                        |
| 7               | 51                | 0.99                        | 2                                  | 1.00                  | 0.00                    | 1.00                        |
| 7               | 52                | 1.00                        | 2                                  | 1.00                  | 0.00                    | 1.00                        |
| 7               | 53                | 1.00                        | 3                                  | 1.00                  | 0.00                    | 1.00                        |
| 7               | 54                | 1.00                        | 7                                  | 1.00                  | 0.00                    | 1.00                        |
| 7               | 55                | 0.99                        | 2                                  | 1.00                  | 0.00                    | 1.00                        |
| 7               | 56                | 1.00                        | 2                                  | 1.00                  | 0.00                    | 1.00                        |
| 7               | 57                | 0.97                        | 8                                  | 0.98                  | 0.00                    | 1.00                        |
| 7               | 58                | 0.99                        | 1                                  | 1.00                  | 0.00                    | 1.00                        |
| 7               | 59                | 0.99                        | 2                                  | 1.00                  | 0.00                    | 1.00                        |
| 7               | 60                | 1.00                        | 3                                  | 1.00                  | 0.00                    | 1.00                        |
| 7               | 61                | 0.99                        | 2                                  | 1.00                  | 0.00                    | 1.00                        |
| 7               | 62                | 1.00                        | 4                                  | 1.00                  | 0.00                    | 1.00                        |
| 7               | 63                | 0.99                        | 2                                  | 1.00                  | 0.00                    | 1.00                        |

*Continued on next page*

Table S1 – *Continued from previous page*

| <b>Fault No</b> | <b>Sample Bin</b> | <b>Fault Detection Rate</b> | <b>Optimal Feature Subset Size</b> | <b>Model Accuracy</b> | <b>False Alarm Rate</b> | <b>Area Under the Curve</b> |
|-----------------|-------------------|-----------------------------|------------------------------------|-----------------------|-------------------------|-----------------------------|
| 7               | 64                | 0.99                        | 4                                  | 1.00                  | 0.00                    | 1.00                        |
| 7               | 65                | 0.99                        | 3                                  | 1.00                  | 0.00                    | 1.00                        |
| 7               | 66                | 0.99                        | 2                                  | 1.00                  | 0.00                    | 1.00                        |
| 7               | 67                | 0.99                        | 2                                  | 1.00                  | 0.00                    | 1.00                        |
| 7               | 68                | 0.99                        | 1                                  | 1.00                  | 0.00                    | 1.00                        |
| 7               | 69                | 0.99                        | 3                                  | 1.00                  | 0.00                    | 1.00                        |
| 7               | 70                | 0.94                        | 1                                  | 0.97                  | 0.00                    | 1.00                        |
| 7               | 71                | 1.00                        | 1                                  | 1.00                  | 0.00                    | 1.00                        |
| 7               | 72                | 1.00                        | 2                                  | 1.00                  | 0.00                    | 1.00                        |
| 7               | 73                | 0.99                        | 2                                  | 1.00                  | 0.00                    | 1.00                        |
| 7               | 74                | 0.99                        | 3                                  | 1.00                  | 0.00                    | 1.00                        |
| 7               | 75                | 0.99                        | 2                                  | 1.00                  | 0.00                    | 1.00                        |
| 7               | 76                | 1.00                        | 2                                  | 1.00                  | 0.00                    | 1.00                        |
| 7               | 77                | 0.99                        | 1                                  | 1.00                  | 0.00                    | 1.00                        |
| 7               | 78                | 0.99                        | 5                                  | 1.00                  | 0.00                    | 1.00                        |
| 7               | 79                | 0.99                        | 2                                  | 1.00                  | 0.00                    | 1.00                        |
| 7               | 80                | 1.00                        | 3                                  | 1.00                  | 0.00                    | 1.00                        |
| 7               | 81                | 1.00                        | 5                                  | 1.00                  | 0.00                    | 1.00                        |
| 7               | 82                | 1.00                        | 3                                  | 1.00                  | 0.00                    | 1.00                        |
| 7               | 83                | 0.99                        | 3                                  | 1.00                  | 0.00                    | 1.00                        |
| 7               | 84                | 1.00                        | 6                                  | 1.00                  | 0.00                    | 1.00                        |
| 7               | 85                | 1.00                        | 3                                  | 1.00                  | 0.00                    | 1.00                        |
| 7               | 86                | 1.00                        | 5                                  | 1.00                  | 0.00                    | 1.00                        |
| 7               | 87                | 1.00                        | 9                                  | 1.00                  | 0.00                    | 1.00                        |
| 7               | 88                | 1.00                        | 3                                  | 1.00                  | 0.00                    | 1.00                        |
| 7               | 89                | 1.00                        | 2                                  | 1.00                  | 0.00                    | 1.00                        |

*Continued on next page*



Table S1 – *Continued from previous page*

| <b>Fault No</b> | <b>Sample Bin</b> | <b>Fault Detection Rate</b> | <b>Optimal Feature Subset Size</b> | <b>Model Accuracy</b> | <b>False Alarm Rate</b> | <b>Area Under the Curve</b> |
|-----------------|-------------------|-----------------------------|------------------------------------|-----------------------|-------------------------|-----------------------------|
| 7               | 90                | 1.00                        | 3                                  | 1.00                  | 0.00                    | 1.00                        |
| 7               | 91                | 1.00                        | 2                                  | 1.00                  | 0.00                    | 1.00                        |
| 7               | 92                | 1.00                        | 2                                  | 1.00                  | 0.00                    | 1.00                        |
| 7               | 93                | 0.99                        | 2                                  | 1.00                  | 0.00                    | 1.00                        |
| 7               | 94                | 0.99                        | 3                                  | 1.00                  | 0.00                    | 1.00                        |
| 7               | 95                | 0.99                        | 5                                  | 1.00                  | 0.00                    | 1.00                        |
| 7               | 96                | 1.00                        | 2                                  | 1.00                  | 0.00                    | 1.00                        |
| 7               | 97                | 1.00                        | 2                                  | 1.00                  | 0.00                    | 1.00                        |
| 7               | 98                | 1.00                        | 3                                  | 1.00                  | 0.00                    | 1.00                        |
| 7               | 99                | 1.00                        | 1                                  | 1.00                  | 0.00                    | 1.00                        |
| 7               | 100               | 1.00                        | 3                                  | 1.00                  | 0.00                    | 1.00                        |
| 7               | 101               | 1.00                        | 3                                  | 1.00                  | 0.00                    | 1.00                        |
| 7               | 102               | 1.00                        | 5                                  | 1.00                  | 0.00                    | 1.00                        |
| 7               | 103               | 1.00                        | 4                                  | 1.00                  | 0.00                    | 1.00                        |
| 7               | 104               | 1.00                        | 2                                  | 1.00                  | 0.00                    | 1.00                        |
| 7               | 105               | 1.00                        | 2                                  | 1.00                  | 0.00                    | 1.00                        |
| 7               | 106               | 1.00                        | 3                                  | 1.00                  | 0.00                    | 1.00                        |
| 7               | 107               | 1.00                        | 6                                  | 1.00                  | 0.00                    | 1.00                        |
| 7               | 108               | 1.00                        | 1                                  | 1.00                  | 0.00                    | 1.00                        |
| 7               | 109               | 1.00                        | 9                                  | 1.00                  | 0.00                    | 1.00                        |
| 7               | 110               | 1.00                        | 3                                  | 1.00                  | 0.00                    | 1.00                        |
| 7               | 111               | 1.00                        | 8                                  | 1.00                  | 0.00                    | 1.00                        |
| 7               | 112               | 1.00                        | 1                                  | 1.00                  | 0.00                    | 1.00                        |
| 7               | 113               | 1.00                        | 1                                  | 1.00                  | 0.00                    | 1.00                        |
| 7               | 114               | 1.00                        | 1                                  | 1.00                  | 0.00                    | 1.00                        |
| 7               | 115               | 1.00                        | 9                                  | 1.00                  | 0.00                    | 1.00                        |

*Continued on next page*

Table S1 – *Continued from previous page*

| <b>Fault No</b> | <b>Sample Bin</b> | <b>Fault Detection Rate</b> | <b>Optimal Feature Subset Size</b> | <b>Model Accuracy</b> | <b>False Alarm Rate</b> | <b>Area Under the Curve</b> |
|-----------------|-------------------|-----------------------------|------------------------------------|-----------------------|-------------------------|-----------------------------|
| 7               | 116               | 1.00                        | 5                                  | 1.00                  | 0.00                    | 1.00                        |
| 7               | 117               | 1.00                        | 1                                  | 1.00                  | 0.00                    | 1.00                        |
| 7               | 118               | 1.00                        | 5                                  | 1.00                  | 0.00                    | 1.00                        |
| 7               | 119               | 1.00                        | 1                                  | 1.00                  | 0.00                    | 1.00                        |
| 7               | 120               | 1.00                        | 9                                  | 1.00                  | 0.00                    | 1.00                        |
| 8               | 2                 | 0.82                        | 37                                 | 0.87                  | 0.08                    | 0.94                        |
| 8               | 3                 | 0.75                        | 12                                 | 0.83                  | 0.09                    | 0.91                        |
| 8               | 4                 | 0.77                        | 16                                 | 0.83                  | 0.11                    | 0.89                        |
| 8               | 5                 | 0.93                        | 5                                  | 0.91                  | 0.10                    | 0.98                        |
| 8               | 6                 | 0.75                        | 27                                 | 0.83                  | 0.09                    | 0.89                        |
| 8               | 7                 | 0.70                        | 15                                 | 0.81                  | 0.09                    | 0.89                        |
| 8               | 8                 | 0.75                        | 16                                 | 0.82                  | 0.10                    | 0.91                        |
| 8               | 9                 | 0.75                        | 8                                  | 0.83                  | 0.08                    | 0.89                        |
| 8               | 10                | 0.83                        | 24                                 | 0.84                  | 0.14                    | 0.92                        |
| 8               | 11                | 0.78                        | 50                                 | 0.82                  | 0.14                    | 0.90                        |
| 8               | 12                | 0.84                        | 28                                 | 0.88                  | 0.09                    | 0.94                        |
| 8               | 13                | 0.85                        | 24                                 | 0.87                  | 0.12                    | 0.94                        |
| 8               | 14                | 0.77                        | 57                                 | 0.82                  | 0.13                    | 0.89                        |
| 8               | 15                | 0.74                        | 59                                 | 0.74                  | 0.25                    | 0.83                        |
| 8               | 16                | 0.75                        | 26                                 | 0.82                  | 0.11                    | 0.89                        |
| 8               | 17                | 0.76                        | 29                                 | 0.81                  | 0.14                    | 0.88                        |
| 8               | 18                | 0.75                        | 45                                 | 0.76                  | 0.23                    | 0.84                        |
| 8               | 19                | 0.73                        | 115                                | 0.74                  | 0.25                    | 0.83                        |
| 8               | 20                | 0.70                        | 16                                 | 0.77                  | 0.15                    | 0.84                        |
| 8               | 21                | 0.83                        | 26                                 | 0.86                  | 0.11                    | 0.93                        |
| 8               | 22                | 0.91                        | 8                                  | 0.95                  | 0.00                    | 0.97                        |

*Continued on next page*

Table S1 – *Continued from previous page*

| <b>Fault No</b> | <b>Sample Bin</b> | <b>Fault Detection Rate</b> | <b>Optimal Feature Subset Size</b> | <b>Model Accuracy</b> | <b>False Alarm Rate</b> | <b>Area Under the Curve</b> |
|-----------------|-------------------|-----------------------------|------------------------------------|-----------------------|-------------------------|-----------------------------|
| 8               | 23                | 0.82                        | 35                                 | 0.85                  | 0.12                    | 0.92                        |
| 8               | 24                | 0.90                        | 2                                  | 0.94                  | 0.02                    | 0.98                        |
| 8               | 25                | 0.90                        | 16                                 | 0.93                  | 0.04                    | 0.97                        |
| 8               | 26                | 0.91                        | 19                                 | 0.95                  | 0.01                    | 0.98                        |
| 8               | 27                | 0.90                        | 2                                  | 0.95                  | 0.00                    | 0.98                        |
| 8               | 28                | 0.92                        | 3                                  | 0.96                  | 0.01                    | 0.98                        |
| 8               | 29                | 0.91                        | 2                                  | 0.96                  | 0.00                    | 0.98                        |
| 8               | 30                | 0.93                        | 10                                 | 0.95                  | 0.03                    | 0.99                        |
| 8               | 31                | 0.94                        | 20                                 | 0.97                  | 0.00                    | 0.99                        |
| 8               | 32                | 0.92                        | 33                                 | 0.96                  | 0.00                    | 0.99                        |
| 8               | 33                | 0.95                        | 7                                  | 0.98                  | 0.00                    | 0.99                        |
| 8               | 34                | 0.96                        | 2                                  | 0.98                  | 0.00                    | 1.00                        |
| 8               | 35                | 0.95                        | 2                                  | 0.97                  | 0.01                    | 1.00                        |
| 8               | 36                | 0.92                        | 24                                 | 0.96                  | 0.00                    | 0.99                        |
| 8               | 37                | 0.95                        | 2                                  | 0.98                  | 0.00                    | 0.99                        |
| 8               | 38                | 0.93                        | 2                                  | 0.97                  | 0.00                    | 0.98                        |
| 8               | 39                | 0.94                        | 27                                 | 0.97                  | 0.00                    | 0.99                        |
| 8               | 40                | 0.94                        | 9                                  | 0.97                  | 0.00                    | 0.99                        |
| 8               | 41                | 0.93                        | 2                                  | 0.96                  | 0.00                    | 0.99                        |
| 8               | 42                | 0.95                        | 4                                  | 0.97                  | 0.00                    | 0.99                        |
| 8               | 43                | 0.94                        | 3                                  | 0.97                  | 0.00                    | 0.99                        |
| 8               | 44                | 0.95                        | 4                                  | 0.97                  | 0.00                    | 0.99                        |
| 8               | 45                | 0.96                        | 2                                  | 0.98                  | 0.00                    | 1.00                        |
| 8               | 46                | 0.96                        | 14                                 | 0.98                  | 0.00                    | 0.99                        |
| 8               | 47                | 0.95                        | 3                                  | 0.97                  | 0.01                    | 0.99                        |
| 8               | 48                | 0.94                        | 3                                  | 0.97                  | 0.00                    | 0.99                        |

*Continued on next page*

Table S1 – *Continued from previous page*

| <b>Fault No</b> | <b>Sample Bin</b> | <b>Fault Detection Rate</b> | <b>Optimal Feature Subset Size</b> | <b>Model Accuracy</b> | <b>False Alarm Rate</b> | <b>Area Under the Curve</b> |
|-----------------|-------------------|-----------------------------|------------------------------------|-----------------------|-------------------------|-----------------------------|
| 8               | 49                | 0.95                        | 3                                  | 0.98                  | 0.00                    | 0.99                        |
| 8               | 50                | 0.96                        | 3                                  | 0.98                  | 0.00                    | 0.99                        |
| 8               | 51                | 0.96                        | 11                                 | 0.98                  | 0.00                    | 0.99                        |
| 8               | 52                | 0.96                        | 2                                  | 0.98                  | 0.00                    | 0.99                        |
| 8               | 53                | 0.97                        | 21                                 | 0.98                  | 0.00                    | 1.00                        |
| 8               | 54                | 0.96                        | 14                                 | 0.98                  | 0.00                    | 0.99                        |
| 8               | 55                | 0.95                        | 4                                  | 0.97                  | 0.00                    | 0.99                        |
| 8               | 56                | 0.95                        | 4                                  | 0.98                  | 0.00                    | 0.99                        |
| 8               | 57                | 0.96                        | 4                                  | 0.98                  | 0.00                    | 0.99                        |
| 8               | 58                | 0.96                        | 3                                  | 0.98                  | 0.00                    | 0.99                        |
| 8               | 59                | 0.97                        | 20                                 | 0.98                  | 0.00                    | 0.99                        |
| 8               | 60                | 0.96                        | 4                                  | 0.98                  | 0.00                    | 1.00                        |
| 8               | 61                | 0.96                        | 7                                  | 0.98                  | 0.00                    | 0.99                        |
| 8               | 62                | 0.96                        | 22                                 | 0.98                  | 0.01                    | 0.99                        |
| 8               | 63                | 0.96                        | 22                                 | 0.98                  | 0.01                    | 0.99                        |
| 8               | 64                | 0.97                        | 20                                 | 0.98                  | 0.00                    | 1.00                        |
| 8               | 65                | 0.96                        | 14                                 | 0.98                  | 0.00                    | 0.99                        |
| 8               | 66                | 0.96                        | 34                                 | 0.98                  | 0.01                    | 0.99                        |
| 8               | 67                | 0.96                        | 14                                 | 0.98                  | 0.00                    | 1.00                        |
| 8               | 68                | 0.97                        | 21                                 | 0.98                  | 0.01                    | 0.99                        |
| 8               | 69                | 0.95                        | 15                                 | 0.98                  | 0.00                    | 0.99                        |
| 8               | 70                | 0.95                        | 5                                  | 0.98                  | 0.00                    | 0.99                        |
| 8               | 71                | 0.96                        | 7                                  | 0.98                  | 0.00                    | 1.00                        |
| 8               | 72                | 0.96                        | 10                                 | 0.98                  | 0.00                    | 0.99                        |
| 8               | 73                | 0.96                        | 18                                 | 0.98                  | 0.00                    | 0.99                        |
| 8               | 74                | 0.95                        | 3                                  | 0.97                  | 0.01                    | 0.99                        |

*Continued on next page*

Table S1 – *Continued from previous page*

| <b>Fault No</b> | <b>Sample Bin</b> | <b>Fault Detection Rate</b> | <b>Optimal Feature Subset Size</b> | <b>Model Accuracy</b> | <b>False Alarm Rate</b> | <b>Area Under the Curve</b> |
|-----------------|-------------------|-----------------------------|------------------------------------|-----------------------|-------------------------|-----------------------------|
| 8               | 75                | 0.95                        | 31                                 | 0.97                  | 0.00                    | 0.99                        |
| 8               | 76                | 0.95                        | 6                                  | 0.97                  | 0.00                    | 0.99                        |
| 8               | 77                | 0.96                        | 28                                 | 0.98                  | 0.00                    | 0.99                        |
| 8               | 78                | 0.96                        | 6                                  | 0.98                  | 0.00                    | 0.99                        |
| 8               | 79                | 0.95                        | 26                                 | 0.97                  | 0.00                    | 0.99                        |
| 8               | 80                | 0.95                        | 34                                 | 0.97                  | 0.00                    | 0.99                        |
| 8               | 81                | 0.96                        | 28                                 | 0.98                  | 0.00                    | 1.00                        |
| 8               | 82                | 0.96                        | 32                                 | 0.98                  | 0.01                    | 1.00                        |
| 8               | 83                | 0.96                        | 3                                  | 0.98                  | 0.01                    | 1.00                        |
| 8               | 84                | 0.95                        | 34                                 | 0.97                  | 0.00                    | 0.99                        |
| 8               | 85                | 0.95                        | 27                                 | 0.97                  | 0.00                    | 0.99                        |
| 8               | 86                | 0.95                        | 34                                 | 0.97                  | 0.00                    | 1.00                        |
| 8               | 87                | 0.95                        | 31                                 | 0.98                  | 0.00                    | 0.99                        |
| 8               | 88                | 0.95                        | 34                                 | 0.98                  | 0.00                    | 0.99                        |
| 8               | 89                | 0.96                        | 40                                 | 0.98                  | 0.00                    | 1.00                        |
| 8               | 90                | 0.94                        | 33                                 | 0.97                  | 0.00                    | 0.99                        |
| 8               | 91                | 0.96                        | 4                                  | 0.97                  | 0.01                    | 0.99                        |
| 8               | 92                | 0.96                        | 40                                 | 0.98                  | 0.00                    | 1.00                        |
| 8               | 93                | 0.95                        | 13                                 | 0.97                  | 0.01                    | 0.99                        |
| 8               | 94                | 0.96                        | 30                                 | 0.98                  | 0.00                    | 0.99                        |
| 8               | 95                | 0.96                        | 35                                 | 0.98                  | 0.00                    | 1.00                        |
| 8               | 96                | 0.95                        | 26                                 | 0.97                  | 0.01                    | 1.00                        |
| 8               | 97                | 0.95                        | 4                                  | 0.97                  | 0.00                    | 0.99                        |
| 8               | 98                | 0.95                        | 38                                 | 0.97                  | 0.00                    | 0.99                        |
| 8               | 99                | 0.96                        | 41                                 | 0.98                  | 0.00                    | 0.99                        |
| 8               | 100               | 0.96                        | 27                                 | 0.98                  | 0.00                    | 0.99                        |

*Continued on next page*

Table S1 – *Continued from previous page*

| <b>Fault No</b> | <b>Sample Bin</b> | <b>Fault Detection Rate</b> | <b>Optimal Feature Subset Size</b> | <b>Model Accuracy</b> | <b>False Alarm Rate</b> | <b>Area Under the Curve</b> |
|-----------------|-------------------|-----------------------------|------------------------------------|-----------------------|-------------------------|-----------------------------|
| 8               | 101               | 0.96                        | 13                                 | 0.98                  | 0.00                    | 1.00                        |
| 8               | 102               | 0.96                        | 30                                 | 0.98                  | 0.00                    | 1.00                        |
| 8               | 103               | 0.96                        | 44                                 | 0.98                  | 0.00                    | 0.99                        |
| 8               | 104               | 0.95                        | 22                                 | 0.97                  | 0.01                    | 0.99                        |
| 8               | 105               | 0.95                        | 28                                 | 0.98                  | 0.00                    | 0.99                        |
| 8               | 106               | 0.97                        | 27                                 | 0.98                  | 0.00                    | 1.00                        |
| 8               | 107               | 0.97                        | 32                                 | 0.98                  | 0.00                    | 1.00                        |
| 8               | 108               | 0.97                        | 35                                 | 0.98                  | 0.00                    | 1.00                        |
| 8               | 109               | 0.96                        | 13                                 | 0.98                  | 0.00                    | 1.00                        |
| 8               | 110               | 0.97                        | 10                                 | 0.98                  | 0.00                    | 1.00                        |
| 8               | 111               | 0.97                        | 35                                 | 0.99                  | 0.00                    | 1.00                        |
| 8               | 112               | 0.97                        | 31                                 | 0.99                  | 0.00                    | 1.00                        |
| 8               | 113               | 0.97                        | 6                                  | 0.99                  | 0.00                    | 1.00                        |
| 8               | 114               | 0.97                        | 15                                 | 0.97                  | 0.02                    | 1.00                        |
| 8               | 115               | 0.98                        | 12                                 | 0.99                  | 0.00                    | 1.00                        |
| 8               | 116               | 0.97                        | 30                                 | 0.98                  | 0.00                    | 1.00                        |
| 8               | 117               | 0.97                        | 10                                 | 0.98                  | 0.00                    | 1.00                        |
| 8               | 118               | 0.98                        | 13                                 | 0.99                  | 0.00                    | 1.00                        |
| 8               | 119               | 0.98                        | 31                                 | 0.99                  | 0.00                    | 1.00                        |
| 8               | 120               | 0.97                        | 28                                 | 0.98                  | 0.00                    | 1.00                        |
| 9               | 2                 | 0.90                        | 45                                 | 0.95                  | 0.01                    | 0.98                        |
| 9               | 3                 | 0.92                        | 3                                  | 0.96                  | 0.00                    | 0.97                        |
| 9               | 4                 | 0.68                        | 2                                  | 0.83                  | 0.02                    | 0.89                        |
| 9               | 5                 | 0.73                        | 12                                 | 0.83                  | 0.08                    | 0.92                        |
| 9               | 6                 | 0.75                        | 21                                 | 0.83                  | 0.10                    | 0.92                        |
| 9               | 7                 | 0.58                        | 2                                  | 0.78                  | 0.03                    | 0.83                        |

*Continued on next page*

Table S1 – *Continued from previous page*

| <b>Fault No</b> | <b>Sample Bin</b> | <b>Fault Detection Rate</b> | <b>Optimal Feature Subset Size</b> | <b>Model Accuracy</b> | <b>False Alarm Rate</b> | <b>Area Under the Curve</b> |
|-----------------|-------------------|-----------------------------|------------------------------------|-----------------------|-------------------------|-----------------------------|
| 9               | 8                 | 0.50                        | 5                                  | 0.75                  | 0.00                    | 0.82                        |
| 9               | 9                 | 0.76                        | 49                                 | 0.79                  | 0.19                    | 0.87                        |
| 9               | 10                | 0.47                        | 34                                 | 0.72                  | 0.04                    | 0.78                        |
| 9               | 11                | 0.46                        | 32                                 | 0.70                  | 0.06                    | 0.76                        |
| 9               | 12                | 0.39                        | 55                                 | 0.67                  | 0.05                    | 0.77                        |
| 9               | 13                | 0.41                        | 89                                 | 0.68                  | 0.05                    | 0.71                        |
| 9               | 14                | 0.47                        | 30                                 | 0.72                  | 0.03                    | 0.80                        |
| 9               | 15                | 0.39                        | 8                                  | 0.69                  | 0.00                    | 0.72                        |
| 9               | 16                | 0.37                        | 16                                 | 0.67                  | 0.03                    | 0.75                        |
| 9               | 17                | 0.45                        | 17                                 | 0.70                  | 0.04                    | 0.77                        |
| 9               | 18                | 0.36                        | 6                                  | 0.67                  | 0.02                    | 0.71                        |
| 9               | 19                | 0.28                        | 26                                 | 0.64                  | 0.00                    | 0.70                        |
| 9               | 20                | 0.35                        | 111                                | 0.62                  | 0.12                    | 0.68                        |
| 9               | 21                | 0.40                        | 39                                 | 0.66                  | 0.08                    | 0.75                        |
| 9               | 22                | 0.49                        | 1                                  | 0.55                  | 0.40                    | 0.59                        |
| 9               | 23                | 0.52                        | 97                                 | 0.65                  | 0.22                    | 0.71                        |
| 9               | 24                | 0.39                        | 15                                 | 0.65                  | 0.08                    | 0.74                        |
| 9               | 25                | 0.36                        | 24                                 | 0.66                  | 0.04                    | 0.74                        |
| 9               | 26                | 0.43                        | 25                                 | 0.68                  | 0.07                    | 0.75                        |
| 9               | 27                | 0.36                        | 52                                 | 0.66                  | 0.03                    | 0.74                        |
| 9               | 28                | 0.38                        | 56                                 | 0.68                  | 0.02                    | 0.75                        |
| 9               | 29                | 0.41                        | 42                                 | 0.67                  | 0.06                    | 0.74                        |
| 9               | 30                | 0.54                        | 25                                 | 0.69                  | 0.16                    | 0.77                        |
| 9               | 31                | 0.39                        | 51                                 | 0.67                  | 0.04                    | 0.75                        |
| 9               | 32                | 0.45                        | 39                                 | 0.69                  | 0.08                    | 0.74                        |
| 9               | 33                | 0.38                        | 3                                  | 0.69                  | 0.00                    | 0.72                        |

*Continued on next page*

Table S1 – *Continued from previous page*

| <b>Fault No</b> | <b>Sample Bin</b> | <b>Fault Detection Rate</b> | <b>Optimal Feature Subset Size</b> | <b>Model Accuracy</b> | <b>False Alarm Rate</b> | <b>Area Under the Curve</b> |
|-----------------|-------------------|-----------------------------|------------------------------------|-----------------------|-------------------------|-----------------------------|
| 9               | 34                | 0.43                        | 55                                 | 0.69                  | 0.05                    | 0.74                        |
| 9               | 35                | 0.54                        | 35                                 | 0.70                  | 0.14                    | 0.78                        |
| 9               | 36                | 0.48                        | 45                                 | 0.70                  | 0.08                    | 0.77                        |
| 9               | 37                | 0.51                        | 45                                 | 0.71                  | 0.08                    | 0.77                        |
| 9               | 38                | 0.50                        | 56                                 | 0.69                  | 0.12                    | 0.75                        |
| 9               | 39                | 0.58                        | 113                                | 0.65                  | 0.27                    | 0.70                        |
| 9               | 40                | 0.56                        | 76                                 | 0.66                  | 0.24                    | 0.71                        |
| 9               | 41                | 0.47                        | 40                                 | 0.71                  | 0.06                    | 0.77                        |
| 9               | 42                | 0.57                        | 107                                | 0.64                  | 0.28                    | 0.70                        |
| 9               | 43                | 0.57                        | 129                                | 0.65                  | 0.27                    | 0.70                        |
| 9               | 44                | 0.60                        | 68                                 | 0.67                  | 0.27                    | 0.73                        |
| 9               | 45                | 0.57                        | 82                                 | 0.70                  | 0.17                    | 0.74                        |
| 9               | 46                | 0.60                        | 103                                | 0.68                  | 0.24                    | 0.73                        |
| 9               | 47                | 0.59                        | 54                                 | 0.69                  | 0.21                    | 0.74                        |
| 9               | 48                | 0.44                        | 37                                 | 0.69                  | 0.07                    | 0.76                        |
| 9               | 49                | 0.43                        | 9                                  | 0.71                  | 0.00                    | 0.73                        |
| 9               | 50                | 0.59                        | 118                                | 0.65                  | 0.29                    | 0.71                        |
| 9               | 51                | 0.43                        | 23                                 | 0.70                  | 0.03                    | 0.76                        |
| 9               | 52                | 0.58                        | 116                                | 0.67                  | 0.25                    | 0.72                        |
| 9               | 53                | 0.76                        | 4                                  | 0.54                  | 0.69                    | 0.55                        |
| 9               | 54                | 0.59                        | 43                                 | 0.68                  | 0.22                    | 0.75                        |
| 9               | 55                | 0.58                        | 112                                | 0.67                  | 0.24                    | 0.72                        |
| 9               | 56                | 0.61                        | 134                                | 0.67                  | 0.27                    | 0.73                        |
| 9               | 57                | 0.50                        | 37                                 | 0.69                  | 0.11                    | 0.76                        |
| 9               | 58                | 0.58                        | 131                                | 0.65                  | 0.28                    | 0.71                        |
| 9               | 59                | 0.64                        | 48                                 | 0.67                  | 0.31                    | 0.74                        |

*Continued on next page*



Table S1 – *Continued from previous page*

| <b>Fault No</b> | <b>Sample Bin</b> | <b>Fault Detection Rate</b> | <b>Optimal Feature Subset Size</b> | <b>Model Accuracy</b> | <b>False Alarm Rate</b> | <b>Area Under the Curve</b> |
|-----------------|-------------------|-----------------------------|------------------------------------|-----------------------|-------------------------|-----------------------------|
| 9               | 60                | 0.33                        | 82                                 | 0.65                  | 0.03                    | 0.71                        |
| 9               | 61                | 0.33                        | 3                                  | 0.66                  | 0.00                    | 0.72                        |
| 9               | 62                | 0.32                        | 3                                  | 0.66                  | 0.00                    | 0.71                        |
| 9               | 63                | 0.33                        | 61                                 | 0.65                  | 0.04                    | 0.71                        |
| 9               | 64                | 0.40                        | 47                                 | 0.67                  | 0.07                    | 0.75                        |
| 9               | 65                | 0.41                        | 59                                 | 0.66                  | 0.09                    | 0.70                        |
| 9               | 66                | 0.33                        | 40                                 | 0.66                  | 0.01                    | 0.72                        |
| 9               | 67                | 0.35                        | 25                                 | 0.66                  | 0.03                    | 0.74                        |
| 9               | 68                | 0.31                        | 43                                 | 0.65                  | 0.01                    | 0.73                        |
| 9               | 69                | 0.36                        | 55                                 | 0.66                  | 0.04                    | 0.72                        |
| 9               | 70                | 0.35                        | 34                                 | 0.65                  | 0.04                    | 0.73                        |
| 9               | 71                | 0.31                        | 27                                 | 0.66                  | 0.00                    | 0.74                        |
| 9               | 72                | 0.36                        | 35                                 | 0.66                  | 0.04                    | 0.73                        |
| 9               | 73                | 0.37                        | 59                                 | 0.65                  | 0.07                    | 0.71                        |
| 9               | 74                | 0.43                        | 57                                 | 0.66                  | 0.11                    | 0.72                        |
| 9               | 75                | 0.30                        | 67                                 | 0.64                  | 0.01                    | 0.70                        |
| 9               | 76                | 0.31                        | 83                                 | 0.64                  | 0.03                    | 0.69                        |
| 9               | 77                | 0.39                        | 28                                 | 0.67                  | 0.05                    | 0.73                        |
| 9               | 78                | 0.30                        | 36                                 | 0.64                  | 0.03                    | 0.70                        |
| 9               | 79                | 0.33                        | 109                                | 0.63                  | 0.06                    | 0.66                        |
| 9               | 80                | 0.29                        | 59                                 | 0.64                  | 0.02                    | 0.70                        |
| 9               | 81                | 0.34                        | 49                                 | 0.64                  | 0.07                    | 0.70                        |
| 9               | 82                | 0.40                        | 49                                 | 0.66                  | 0.08                    | 0.72                        |
| 9               | 83                | 0.34                        | 34                                 | 0.65                  | 0.05                    | 0.71                        |
| 9               | 84                | 0.27                        | 77                                 | 0.63                  | 0.01                    | 0.68                        |
| 9               | 85                | 0.35                        | 72                                 | 0.64                  | 0.07                    | 0.68                        |

*Continued on next page*

Table S1 – *Continued from previous page*

| <b>Fault No</b> | <b>Sample Bin</b> | <b>Fault Detection Rate</b> | <b>Optimal Feature Subset Size</b> | <b>Model Accuracy</b> | <b>False Alarm Rate</b> | <b>Area Under the Curve</b> |
|-----------------|-------------------|-----------------------------|------------------------------------|-----------------------|-------------------------|-----------------------------|
| 9               | 86                | 0.36                        | 87                                 | 0.64                  | 0.08                    | 0.67                        |
| 9               | 87                | 0.41                        | 50                                 | 0.65                  | 0.10                    | 0.71                        |
| 9               | 88                | 0.37                        | 59                                 | 0.65                  | 0.07                    | 0.70                        |
| 9               | 89                | 0.39                        | 54                                 | 0.64                  | 0.12                    | 0.69                        |
| 9               | 90                | 0.32                        | 75                                 | 0.63                  | 0.07                    | 0.67                        |
| 9               | 91                | 0.31                        | 67                                 | 0.62                  | 0.06                    | 0.66                        |
| 9               | 92                | 0.28                        | 59                                 | 0.62                  | 0.04                    | 0.66                        |
| 9               | 93                | 0.27                        | 59                                 | 0.62                  | 0.03                    | 0.66                        |
| 9               | 94                | 0.33                        | 74                                 | 0.62                  | 0.09                    | 0.66                        |
| 9               | 95                | 0.36                        | 32                                 | 0.64                  | 0.08                    | 0.68                        |
| 9               | 96                | 0.34                        | 34                                 | 0.62                  | 0.10                    | 0.66                        |
| 9               | 97                | 0.48                        | 73                                 | 0.63                  | 0.21                    | 0.70                        |
| 9               | 98                | 0.32                        | 41                                 | 0.63                  | 0.07                    | 0.67                        |
| 9               | 99                | 0.45                        | 36                                 | 0.63                  | 0.18                    | 0.69                        |
| 9               | 100               | 0.28                        | 71                                 | 0.62                  | 0.04                    | 0.67                        |
| 9               | 101               | 0.35                        | 77                                 | 0.62                  | 0.11                    | 0.67                        |
| 9               | 102               | 0.37                        | 33                                 | 0.62                  | 0.13                    | 0.68                        |
| 9               | 103               | 0.38                        | 43                                 | 0.63                  | 0.13                    | 0.67                        |
| 9               | 104               | 0.31                        | 64                                 | 0.62                  | 0.07                    | 0.68                        |
| 9               | 105               | 0.33                        | 59                                 | 0.63                  | 0.07                    | 0.68                        |
| 9               | 106               | 0.32                        | 98                                 | 0.61                  | 0.11                    | 0.66                        |
| 9               | 107               | 0.37                        | 82                                 | 0.61                  | 0.14                    | 0.65                        |
| 9               | 108               | 0.25                        | 42                                 | 0.61                  | 0.04                    | 0.64                        |
| 9               | 109               | 0.27                        | 34                                 | 0.61                  | 0.06                    | 0.64                        |
| 9               | 110               | 0.27                        | 45                                 | 0.61                  | 0.05                    | 0.64                        |
| 9               | 111               | 0.34                        | 25                                 | 0.62                  | 0.11                    | 0.66                        |

*Continued on next page*

Table S1 – *Continued from previous page*

| <b>Fault No</b> | <b>Sample Bin</b> | <b>Fault Detection Rate</b> | <b>Optimal Feature Subset Size</b> | <b>Model Accuracy</b> | <b>False Alarm Rate</b> | <b>Area Under the Curve</b> |
|-----------------|-------------------|-----------------------------|------------------------------------|-----------------------|-------------------------|-----------------------------|
| 9               | 112               | 0.27                        | 58                                 | 0.60                  | 0.08                    | 0.61                        |
| 9               | 113               | 0.31                        | 61                                 | 0.61                  | 0.09                    | 0.64                        |
| 9               | 114               | 0.36                        | 60                                 | 0.61                  | 0.15                    | 0.66                        |
| 9               | 115               | 0.36                        | 58                                 | 0.61                  | 0.13                    | 0.65                        |
| 9               | 116               | 0.40                        | 43                                 | 0.62                  | 0.16                    | 0.67                        |
| 9               | 117               | 0.25                        | 59                                 | 0.60                  | 0.05                    | 0.63                        |
| 9               | 118               | 0.34                        | 42                                 | 0.61                  | 0.11                    | 0.65                        |
| 9               | 119               | 0.41                        | 30                                 | 0.62                  | 0.18                    | 0.67                        |
| 9               | 120               | 0.31                        | 42                                 | 0.60                  | 0.11                    | 0.64                        |
| 10              | 2                 | 0.77                        | 11                                 | 0.82                  | 0.13                    | 0.93                        |
| 10              | 3                 | 0.87                        | 21                                 | 0.90                  | 0.07                    | 0.96                        |
| 10              | 4                 | 0.51                        | 2                                  | 0.74                  | 0.03                    | 0.76                        |
| 10              | 5                 | 0.79                        | 8                                  | 0.81                  | 0.17                    | 0.91                        |
| 10              | 6                 | 0.97                        | 1                                  | 0.60                  | 0.77                    | 0.95                        |
| 10              | 7                 | 0.61                        | 6                                  | 0.77                  | 0.07                    | 0.83                        |
| 10              | 8                 | 0.74                        | 31                                 | 0.80                  | 0.14                    | 0.88                        |
| 10              | 9                 | 0.87                        | 28                                 | 0.87                  | 0.13                    | 0.95                        |
| 10              | 10                | 0.82                        | 33                                 | 0.86                  | 0.11                    | 0.93                        |
| 10              | 11                | 0.75                        | 18                                 | 0.84                  | 0.07                    | 0.92                        |
| 10              | 12                | 0.84                        | 26                                 | 0.84                  | 0.15                    | 0.92                        |
| 10              | 13                | 0.74                        | 31                                 | 0.82                  | 0.10                    | 0.91                        |
| 10              | 14                | 0.78                        | 30                                 | 0.87                  | 0.04                    | 0.94                        |
| 10              | 15                | 0.75                        | 46                                 | 0.85                  | 0.06                    | 0.91                        |
| 10              | 16                | 0.87                        | 40                                 | 0.89                  | 0.08                    | 0.96                        |
| 10              | 17                | 0.86                        | 21                                 | 0.90                  | 0.06                    | 0.95                        |
| 10              | 18                | 0.72                        | 15                                 | 0.85                  | 0.01                    | 0.93                        |

*Continued on next page*

Table S1 – *Continued from previous page*

| <b>Fault No</b> | <b>Sample Bin</b> | <b>Fault Detection Rate</b> | <b>Optimal Feature Subset Size</b> | <b>Model Accuracy</b> | <b>False Alarm Rate</b> | <b>Area Under the Curve</b> |
|-----------------|-------------------|-----------------------------|------------------------------------|-----------------------|-------------------------|-----------------------------|
| 10              | 19                | 0.86                        | 23                                 | 0.90                  | 0.07                    | 0.96                        |
| 10              | 20                | 0.76                        | 31                                 | 0.83                  | 0.11                    | 0.90                        |
| 10              | 21                | 0.73                        | 5                                  | 0.86                  | 0.01                    | 0.94                        |
| 10              | 22                | 0.73                        | 4                                  | 0.83                  | 0.07                    | 0.91                        |
| 10              | 23                | 0.63                        | 3                                  | 0.82                  | 0.00                    | 0.94                        |
| 10              | 24                | 0.58                        | 6                                  | 0.79                  | 0.00                    | 0.86                        |
| 10              | 25                | 0.50                        | 66                                 | 0.72                  | 0.06                    | 0.79                        |
| 10              | 26                | 0.53                        | 57                                 | 0.73                  | 0.06                    | 0.80                        |
| 10              | 27                | 0.52                        | 52                                 | 0.73                  | 0.06                    | 0.80                        |
| 10              | 28                | 0.59                        | 28                                 | 0.73                  | 0.13                    | 0.81                        |
| 10              | 29                | 0.51                        | 80                                 | 0.69                  | 0.13                    | 0.75                        |
| 10              | 30                | 0.56                        | 28                                 | 0.72                  | 0.12                    | 0.78                        |
| 10              | 31                | 0.47                        | 62                                 | 0.70                  | 0.08                    | 0.77                        |
| 10              | 32                | 0.45                        | 63                                 | 0.69                  | 0.07                    | 0.77                        |
| 10              | 33                | 0.46                        | 53                                 | 0.69                  | 0.08                    | 0.77                        |
| 10              | 34                | 0.45                        | 26                                 | 0.70                  | 0.06                    | 0.76                        |
| 10              | 35                | 0.47                        | 53                                 | 0.68                  | 0.11                    | 0.75                        |
| 10              | 36                | 0.61                        | 36                                 | 0.71                  | 0.20                    | 0.78                        |
| 10              | 37                | 0.46                        | 41                                 | 0.69                  | 0.08                    | 0.75                        |
| 10              | 38                | 0.52                        | 59                                 | 0.68                  | 0.15                    | 0.76                        |
| 10              | 39                | 0.53                        | 47                                 | 0.68                  | 0.17                    | 0.76                        |
| 10              | 40                | 0.47                        | 47                                 | 0.68                  | 0.12                    | 0.74                        |
| 10              | 41                | 0.43                        | 20                                 | 0.67                  | 0.09                    | 0.72                        |
| 10              | 42                | 0.50                        | 35                                 | 0.68                  | 0.14                    | 0.74                        |
| 10              | 43                | 0.49                        | 48                                 | 0.66                  | 0.18                    | 0.71                        |
| 10              | 44                | 0.54                        | 38                                 | 0.66                  | 0.21                    | 0.73                        |

*Continued on next page*

Table S1 – *Continued from previous page*

| <b>Fault No</b> | <b>Sample Bin</b> | <b>Fault Detection Rate</b> | <b>Optimal Feature Subset Size</b> | <b>Model Accuracy</b> | <b>False Alarm Rate</b> | <b>Area Under the Curve</b> |
|-----------------|-------------------|-----------------------------|------------------------------------|-----------------------|-------------------------|-----------------------------|
| 10              | 45                | 0.72                        | 39                                 | 0.68                  | 0.37                    | 0.75                        |
| 10              | 46                | 0.96                        | 5                                  | 0.69                  | 0.58                    | 0.76                        |
| 10              | 47                | 0.91                        | 8                                  | 0.71                  | 0.48                    | 0.81                        |
| 10              | 48                | 0.91                        | 11                                 | 0.79                  | 0.34                    | 0.87                        |
| 10              | 49                | 0.87                        | 9                                  | 0.78                  | 0.30                    | 0.86                        |
| 10              | 50                | 0.89                        | 11                                 | 0.83                  | 0.23                    | 0.91                        |
| 10              | 51                | 0.88                        | 22                                 | 0.85                  | 0.19                    | 0.93                        |
| 10              | 52                | 0.88                        | 30                                 | 0.84                  | 0.20                    | 0.92                        |
| 10              | 53                | 0.86                        | 18                                 | 0.86                  | 0.14                    | 0.93                        |
| 10              | 54                | 0.87                        | 61                                 | 0.88                  | 0.11                    | 0.94                        |
| 10              | 55                | 0.89                        | 17                                 | 0.91                  | 0.08                    | 0.96                        |
| 10              | 56                | 0.88                        | 23                                 | 0.90                  | 0.08                    | 0.96                        |
| 10              | 57                | 0.90                        | 51                                 | 0.92                  | 0.06                    | 0.97                        |
| 10              | 58                | 0.89                        | 18                                 | 0.93                  | 0.04                    | 0.97                        |
| 10              | 59                | 0.89                        | 22                                 | 0.92                  | 0.04                    | 0.98                        |
| 10              | 60                | 0.91                        | 12                                 | 0.93                  | 0.04                    | 0.98                        |
| 10              | 61                | 0.93                        | 18                                 | 0.95                  | 0.02                    | 0.99                        |
| 10              | 62                | 0.94                        | 30                                 | 0.96                  | 0.02                    | 0.99                        |
| 10              | 63                | 0.94                        | 27                                 | 0.96                  | 0.02                    | 0.99                        |
| 10              | 64                | 0.93                        | 14                                 | 0.96                  | 0.01                    | 0.99                        |
| 10              | 65                | 0.93                        | 35                                 | 0.96                  | 0.02                    | 0.99                        |
| 10              | 66                | 0.95                        | 24                                 | 0.97                  | 0.02                    | 0.99                        |
| 10              | 67                | 0.95                        | 6                                  | 0.97                  | 0.01                    | 0.99                        |
| 10              | 68                | 0.95                        | 39                                 | 0.97                  | 0.01                    | 0.99                        |
| 10              | 69                | 0.95                        | 37                                 | 0.97                  | 0.01                    | 0.99                        |
| 10              | 70                | 0.95                        | 19                                 | 0.97                  | 0.01                    | 0.99                        |

*Continued on next page*

Table S1 – *Continued from previous page*

| <b>Fault No</b> | <b>Sample Bin</b> | <b>Fault Detection Rate</b> | <b>Optimal Feature Subset Size</b> | <b>Model Accuracy</b> | <b>False Alarm Rate</b> | <b>Area Under the Curve</b> |
|-----------------|-------------------|-----------------------------|------------------------------------|-----------------------|-------------------------|-----------------------------|
| 10              | 71                | 0.94                        | 30                                 | 0.97                  | 0.01                    | 0.99                        |
| 10              | 72                | 0.95                        | 41                                 | 0.97                  | 0.01                    | 0.99                        |
| 10              | 73                | 0.94                        | 47                                 | 0.96                  | 0.01                    | 0.99                        |
| 10              | 74                | 0.93                        | 36                                 | 0.96                  | 0.01                    | 0.99                        |
| 10              | 75                | 0.93                        | 8                                  | 0.96                  | 0.02                    | 0.99                        |
| 10              | 76                | 0.94                        | 11                                 | 0.97                  | 0.01                    | 0.99                        |
| 10              | 77                | 0.94                        | 27                                 | 0.97                  | 0.00                    | 0.99                        |
| 10              | 78                | 0.95                        | 23                                 | 0.97                  | 0.01                    | 0.99                        |
| 10              | 79                | 0.94                        | 27                                 | 0.96                  | 0.01                    | 0.99                        |
| 10              | 80                | 0.93                        | 8                                  | 0.95                  | 0.03                    | 0.99                        |
| 10              | 81                | 0.95                        | 3                                  | 0.96                  | 0.03                    | 0.99                        |
| 10              | 82                | 0.94                        | 24                                 | 0.96                  | 0.02                    | 0.99                        |
| 10              | 83                | 0.94                        | 27                                 | 0.96                  | 0.01                    | 0.99                        |
| 10              | 84                | 0.94                        | 20                                 | 0.96                  | 0.02                    | 0.99                        |
| 10              | 85                | 0.95                        | 22                                 | 0.97                  | 0.01                    | 0.99                        |
| 10              | 86                | 0.94                        | 5                                  | 0.96                  | 0.02                    | 0.99                        |
| 10              | 87                | 0.95                        | 7                                  | 0.96                  | 0.02                    | 0.99                        |
| 10              | 88                | 0.95                        | 6                                  | 0.96                  | 0.02                    | 0.99                        |
| 10              | 89                | 0.96                        | 5                                  | 0.97                  | 0.02                    | 0.99                        |
| 10              | 90                | 0.96                        | 4                                  | 0.97                  | 0.01                    | 0.99                        |
| 10              | 91                | 0.95                        | 3                                  | 0.97                  | 0.01                    | 0.99                        |
| 10              | 92                | 0.95                        | 38                                 | 0.97                  | 0.01                    | 0.99                        |
| 10              | 93                | 0.94                        | 5                                  | 0.96                  | 0.01                    | 0.99                        |
| 10              | 94                | 0.95                        | 4                                  | 0.97                  | 0.02                    | 1.00                        |
| 10              | 95                | 0.95                        | 5                                  | 0.97                  | 0.01                    | 0.99                        |
| 10              | 96                | 0.94                        | 11                                 | 0.96                  | 0.02                    | 0.99                        |

*Continued on next page*

Table S1 – *Continued from previous page*

| <b>Fault No</b> | <b>Sample Bin</b> | <b>Fault Detection Rate</b> | <b>Optimal Feature Subset Size</b> | <b>Model Accuracy</b> | <b>False Alarm Rate</b> | <b>Area Under the Curve</b> |
|-----------------|-------------------|-----------------------------|------------------------------------|-----------------------|-------------------------|-----------------------------|
| 10              | 97                | 0.95                        | 4                                  | 0.97                  | 0.01                    | 0.99                        |
| 10              | 98                | 0.95                        | 7                                  | 0.97                  | 0.02                    | 0.99                        |
| 10              | 99                | 0.95                        | 3                                  | 0.97                  | 0.02                    | 0.99                        |
| 10              | 100               | 0.95                        | 3                                  | 0.97                  | 0.02                    | 0.99                        |
| 10              | 101               | 0.95                        | 5                                  | 0.97                  | 0.02                    | 0.99                        |
| 10              | 102               | 0.96                        | 24                                 | 0.97                  | 0.01                    | 0.99                        |
| 10              | 103               | 0.95                        | 5                                  | 0.96                  | 0.02                    | 0.99                        |
| 10              | 104               | 0.95                        | 6                                  | 0.96                  | 0.02                    | 0.99                        |
| 10              | 105               | 0.95                        | 33                                 | 0.97                  | 0.01                    | 0.99                        |
| 10              | 106               | 0.95                        | 12                                 | 0.96                  | 0.02                    | 0.99                        |
| 10              | 107               | 0.96                        | 13                                 | 0.97                  | 0.01                    | 1.00                        |
| 10              | 108               | 0.95                        | 16                                 | 0.97                  | 0.01                    | 0.99                        |
| 10              | 109               | 0.95                        | 13                                 | 0.97                  | 0.02                    | 0.99                        |
| 10              | 110               | 0.96                        | 11                                 | 0.97                  | 0.02                    | 1.00                        |
| 10              | 111               | 0.96                        | 48                                 | 0.98                  | 0.00                    | 1.00                        |
| 10              | 112               | 0.96                        | 13                                 | 0.97                  | 0.02                    | 1.00                        |
| 10              | 113               | 0.96                        | 3                                  | 0.98                  | 0.01                    | 1.00                        |
| 10              | 114               | 0.96                        | 12                                 | 0.98                  | 0.01                    | 1.00                        |
| 10              | 115               | 0.96                        | 8                                  | 0.97                  | 0.01                    | 1.00                        |
| 10              | 116               | 0.97                        | 12                                 | 0.98                  | 0.01                    | 1.00                        |
| 10              | 117               | 0.97                        | 16                                 | 0.98                  | 0.01                    | 1.00                        |
| 10              | 118               | 0.96                        | 8                                  | 0.98                  | 0.01                    | 1.00                        |
| 10              | 119               | 0.97                        | 35                                 | 0.98                  | 0.00                    | 1.00                        |
| 10              | 120               | 0.97                        | 9                                  | 0.98                  | 0.01                    | 1.00                        |
| 11              | 2                 | 0.82                        | 26                                 | 0.90                  | 0.03                    | 0.99                        |
| 11              | 3                 | 0.76                        | 6                                  | 0.87                  | 0.03                    | 0.95                        |

*Continued on next page*

Table S1 – *Continued from previous page*

| <b>Fault No</b> | <b>Sample Bin</b> | <b>Fault Detection Rate</b> | <b>Optimal Feature Subset Size</b> | <b>Model Accuracy</b> | <b>False Alarm Rate</b> | <b>Area Under the Curve</b> |
|-----------------|-------------------|-----------------------------|------------------------------------|-----------------------|-------------------------|-----------------------------|
| 11              | 4                 | 0.84                        | 32                                 | 0.89                  | 0.05                    | 0.96                        |
| 11              | 5                 | 0.86                        | 18                                 | 0.89                  | 0.07                    | 0.93                        |
| 11              | 6                 | 0.82                        | 12                                 | 0.89                  | 0.04                    | 0.92                        |
| 11              | 7                 | 0.79                        | 18                                 | 0.82                  | 0.15                    | 0.90                        |
| 11              | 8                 | 0.74                        | 48                                 | 0.78                  | 0.19                    | 0.85                        |
| 11              | 9                 | 0.98                        | 95                                 | 0.52                  | 0.95                    | 0.60                        |
| 11              | 10                | 0.73                        | 13                                 | 0.80                  | 0.13                    | 0.88                        |
| 11              | 11                | 0.67                        | 29                                 | 0.79                  | 0.09                    | 0.88                        |
| 11              | 12                | 0.67                        | 13                                 | 0.79                  | 0.09                    | 0.85                        |
| 11              | 13                | 0.52                        | 6                                  | 0.72                  | 0.08                    | 0.78                        |
| 11              | 14                | 0.53                        | 19                                 | 0.69                  | 0.16                    | 0.77                        |
| 11              | 15                | 0.69                        | 38                                 | 0.69                  | 0.30                    | 0.78                        |
| 11              | 16                | 0.54                        | 2                                  | 0.65                  | 0.24                    | 0.69                        |
| 11              | 17                | 0.48                        | 10                                 | 0.64                  | 0.21                    | 0.69                        |
| 11              | 18                | 0.20                        | 7                                  | 0.59                  | 0.01                    | 0.66                        |
| 11              | 19                | 0.59                        | 47                                 | 0.59                  | 0.42                    | 0.61                        |
| 11              | 20                | 0.58                        | 29                                 | 0.59                  | 0.40                    | 0.62                        |
| 11              | 21                | 0.56                        | 14                                 | 0.55                  | 0.47                    | 0.56                        |
| 11              | 22                | 0.36                        | 13                                 | 0.58                  | 0.19                    | 0.63                        |
| 11              | 23                | 0.62                        | 55                                 | 0.63                  | 0.36                    | 0.67                        |
| 11              | 24                | 0.48                        | 3                                  | 0.58                  | 0.31                    | 0.63                        |
| 11              | 25                | 0.58                        | 41                                 | 0.58                  | 0.43                    | 0.61                        |
| 11              | 26                | 0.59                        | 22                                 | 0.65                  | 0.29                    | 0.71                        |
| 11              | 27                | 0.69                        | 40                                 | 0.68                  | 0.34                    | 0.74                        |
| 11              | 28                | 0.70                        | 12                                 | 0.53                  | 0.65                    | 0.53                        |
| 11              | 29                | 0.62                        | 16                                 | 0.66                  | 0.30                    | 0.72                        |

*Continued on next page*



Table S1 – *Continued from previous page*

| <b>Fault No</b> | <b>Sample Bin</b> | <b>Fault Detection Rate</b> | <b>Optimal Feature Subset Size</b> | <b>Model Accuracy</b> | <b>False Alarm Rate</b> | <b>Area Under the Curve</b> |
|-----------------|-------------------|-----------------------------|------------------------------------|-----------------------|-------------------------|-----------------------------|
| 11              | 30                | 0.88                        | 93                                 | 0.57                  | 0.75                    | 0.58                        |
| 11              | 31                | 0.63                        | 43                                 | 0.64                  | 0.35                    | 0.69                        |
| 11              | 32                | 0.53                        | 58                                 | 0.59                  | 0.34                    | 0.64                        |
| 11              | 33                | 0.62                        | 33                                 | 0.63                  | 0.36                    | 0.68                        |
| 11              | 34                | 0.67                        | 42                                 | 0.67                  | 0.34                    | 0.73                        |
| 11              | 35                | 0.70                        | 70                                 | 0.66                  | 0.39                    | 0.71                        |
| 11              | 36                | 0.63                        | 54                                 | 0.64                  | 0.34                    | 0.71                        |
| 11              | 37                | 0.67                        | 52                                 | 0.66                  | 0.34                    | 0.74                        |
| 11              | 38                | 0.70                        | 115                                | 0.65                  | 0.41                    | 0.71                        |
| 11              | 39                | 0.65                        | 51                                 | 0.68                  | 0.28                    | 0.76                        |
| 11              | 40                | 0.65                        | 57                                 | 0.67                  | 0.30                    | 0.74                        |
| 11              | 41                | 0.64                        | 62                                 | 0.68                  | 0.28                    | 0.75                        |
| 11              | 42                | 0.63                        | 61                                 | 0.65                  | 0.34                    | 0.70                        |
| 11              | 43                | 0.67                        | 45                                 | 0.68                  | 0.30                    | 0.77                        |
| 11              | 44                | 0.62                        | 35                                 | 0.65                  | 0.33                    | 0.70                        |
| 11              | 45                | 0.64                        | 52                                 | 0.66                  | 0.32                    | 0.74                        |
| 11              | 46                | 0.67                        | 29                                 | 0.70                  | 0.27                    | 0.77                        |
| 11              | 47                | 0.63                        | 66                                 | 0.69                  | 0.26                    | 0.74                        |
| 11              | 48                | 0.67                        | 26                                 | 0.70                  | 0.27                    | 0.78                        |
| 11              | 49                | 0.59                        | 48                                 | 0.70                  | 0.19                    | 0.76                        |
| 11              | 50                | 0.61                        | 79                                 | 0.68                  | 0.25                    | 0.74                        |
| 11              | 51                | 0.60                        | 69                                 | 0.68                  | 0.23                    | 0.74                        |
| 11              | 52                | 0.66                        | 137                                | 0.62                  | 0.42                    | 0.68                        |
| 11              | 53                | 0.57                        | 25                                 | 0.68                  | 0.21                    | 0.74                        |
| 11              | 54                | 0.64                        | 52                                 | 0.66                  | 0.32                    | 0.71                        |
| 11              | 55                | 0.60                        | 44                                 | 0.71                  | 0.19                    | 0.77                        |

*Continued on next page*

Table S1 – *Continued from previous page*

| <b>Fault No</b> | <b>Sample Bin</b> | <b>Fault Detection Rate</b> | <b>Optimal Feature Subset Size</b> | <b>Model Accuracy</b> | <b>False Alarm Rate</b> | <b>Area Under the Curve</b> |
|-----------------|-------------------|-----------------------------|------------------------------------|-----------------------|-------------------------|-----------------------------|
| 11              | 56                | 0.63                        | 43                                 | 0.66                  | 0.31                    | 0.73                        |
| 11              | 57                | 0.60                        | 41                                 | 0.70                  | 0.21                    | 0.77                        |
| 11              | 58                | 0.60                        | 40                                 | 0.70                  | 0.19                    | 0.78                        |
| 11              | 59                | 0.60                        | 29                                 | 0.70                  | 0.19                    | 0.78                        |
| 11              | 60                | 0.54                        | 30                                 | 0.69                  | 0.17                    | 0.75                        |
| 11              | 61                | 0.59                        | 56                                 | 0.70                  | 0.19                    | 0.77                        |
| 11              | 62                | 0.64                        | 124                                | 0.63                  | 0.37                    | 0.69                        |
| 11              | 63                | 0.56                        | 31                                 | 0.69                  | 0.19                    | 0.75                        |
| 11              | 64                | 0.59                        | 64                                 | 0.68                  | 0.22                    | 0.75                        |
| 11              | 65                | 0.55                        | 79                                 | 0.66                  | 0.24                    | 0.72                        |
| 11              | 66                | 0.59                        | 59                                 | 0.69                  | 0.21                    | 0.76                        |
| 11              | 67                | 0.56                        | 41                                 | 0.68                  | 0.19                    | 0.75                        |
| 11              | 68                | 0.64                        | 67                                 | 0.67                  | 0.29                    | 0.74                        |
| 11              | 69                | 0.58                        | 95                                 | 0.68                  | 0.23                    | 0.73                        |
| 11              | 70                | 0.56                        | 48                                 | 0.68                  | 0.20                    | 0.75                        |
| 11              | 71                | 0.58                        | 85                                 | 0.68                  | 0.22                    | 0.75                        |
| 11              | 72                | 0.57                        | 68                                 | 0.65                  | 0.26                    | 0.71                        |
| 11              | 73                | 0.63                        | 31                                 | 0.66                  | 0.30                    | 0.72                        |
| 11              | 74                | 0.58                        | 131                                | 0.65                  | 0.28                    | 0.71                        |
| 11              | 75                | 0.59                        | 65                                 | 0.67                  | 0.24                    | 0.75                        |
| 11              | 76                | 0.56                        | 28                                 | 0.70                  | 0.16                    | 0.77                        |
| 11              | 77                | 0.57                        | 69                                 | 0.68                  | 0.20                    | 0.75                        |
| 11              | 78                | 0.57                        | 13                                 | 0.72                  | 0.13                    | 0.78                        |
| 11              | 79                | 0.58                        | 75                                 | 0.68                  | 0.23                    | 0.75                        |
| 11              | 80                | 0.57                        | 67                                 | 0.68                  | 0.20                    | 0.75                        |
| 11              | 81                | 0.59                        | 86                                 | 0.67                  | 0.25                    | 0.73                        |

*Continued on next page*

Table S1 – *Continued from previous page*

| <b>Fault No</b> | <b>Sample Bin</b> | <b>Fault Detection Rate</b> | <b>Optimal Feature Subset Size</b> | <b>Model Accuracy</b> | <b>False Alarm Rate</b> | <b>Area Under the Curve</b> |
|-----------------|-------------------|-----------------------------|------------------------------------|-----------------------|-------------------------|-----------------------------|
| 11              | 82                | 0.59                        | 27                                 | 0.70                  | 0.19                    | 0.77                        |
| 11              | 83                | 0.51                        | 119                                | 0.64                  | 0.22                    | 0.69                        |
| 11              | 84                | 0.56                        | 106                                | 0.65                  | 0.26                    | 0.70                        |
| 11              | 85                | 0.54                        | 39                                 | 0.69                  | 0.17                    | 0.75                        |
| 11              | 86                | 0.58                        | 64                                 | 0.69                  | 0.19                    | 0.77                        |
| 11              | 87                | 0.56                        | 63                                 | 0.69                  | 0.19                    | 0.75                        |
| 11              | 88                | 0.55                        | 36                                 | 0.68                  | 0.19                    | 0.75                        |
| 11              | 89                | 0.56                        | 21                                 | 0.72                  | 0.13                    | 0.78                        |
| 11              | 90                | 0.57                        | 117                                | 0.66                  | 0.25                    | 0.72                        |
| 11              | 91                | 0.58                        | 54                                 | 0.69                  | 0.19                    | 0.76                        |
| 11              | 92                | 0.53                        | 33                                 | 0.68                  | 0.18                    | 0.73                        |
| 11              | 93                | 0.63                        | 20                                 | 0.68                  | 0.28                    | 0.75                        |
| 11              | 94                | 0.57                        | 42                                 | 0.68                  | 0.20                    | 0.74                        |
| 11              | 95                | 0.56                        | 68                                 | 0.68                  | 0.21                    | 0.74                        |
| 11              | 96                | 0.56                        | 1                                  | 0.74                  | 0.08                    | 0.78                        |
| 11              | 97                | 0.58                        | 12                                 | 0.72                  | 0.13                    | 0.78                        |
| 11              | 98                | 0.55                        | 24                                 | 0.69                  | 0.16                    | 0.76                        |
| 11              | 99                | 0.56                        | 1                                  | 0.73                  | 0.10                    | 0.79                        |
| 11              | 100               | 0.56                        | 35                                 | 0.69                  | 0.18                    | 0.76                        |
| 11              | 101               | 0.55                        | 29                                 | 0.69                  | 0.17                    | 0.75                        |
| 11              | 102               | 0.64                        | 44                                 | 0.68                  | 0.28                    | 0.75                        |
| 11              | 103               | 0.55                        | 70                                 | 0.68                  | 0.18                    | 0.74                        |
| 11              | 104               | 0.57                        | 46                                 | 0.70                  | 0.16                    | 0.76                        |
| 11              | 105               | 0.58                        | 9                                  | 0.73                  | 0.11                    | 0.80                        |
| 11              | 106               | 0.57                        | 80                                 | 0.67                  | 0.23                    | 0.74                        |
| 11              | 107               | 0.56                        | 35                                 | 0.70                  | 0.17                    | 0.77                        |

*Continued on next page*

Table S1 – *Continued from previous page*

| <b>Fault No</b> | <b>Sample Bin</b> | <b>Fault Detection Rate</b> | <b>Optimal Feature Subset Size</b> | <b>Model Accuracy</b> | <b>False Alarm Rate</b> | <b>Area Under the Curve</b> |
|-----------------|-------------------|-----------------------------|------------------------------------|-----------------------|-------------------------|-----------------------------|
| 11              | 108               | 0.56                        | 15                                 | 0.73                  | 0.10                    | 0.79                        |
| 11              | 109               | 0.57                        | 33                                 | 0.70                  | 0.17                    | 0.76                        |
| 11              | 110               | 0.57                        | 1                                  | 0.73                  | 0.11                    | 0.79                        |
| 11              | 111               | 0.57                        | 22                                 | 0.71                  | 0.16                    | 0.78                        |
| 11              | 112               | 0.56                        | 23                                 | 0.69                  | 0.18                    | 0.76                        |
| 11              | 113               | 0.56                        | 14                                 | 0.72                  | 0.11                    | 0.77                        |
| 11              | 114               | 0.55                        | 24                                 | 0.69                  | 0.18                    | 0.76                        |
| 11              | 115               | 0.53                        | 1                                  | 0.74                  | 0.06                    | 0.80                        |
| 11              | 116               | 0.58                        | 57                                 | 0.69                  | 0.21                    | 0.76                        |
| 11              | 117               | 0.56                        | 1                                  | 0.73                  | 0.11                    | 0.78                        |
| 11              | 118               | 0.57                        | 9                                  | 0.72                  | 0.13                    | 0.78                        |
| 11              | 119               | 0.56                        | 15                                 | 0.71                  | 0.13                    | 0.78                        |
| 11              | 120               | 0.55                        | 27                                 | 0.69                  | 0.16                    | 0.76                        |
| 12              | 2                 | 0.79                        | 7                                  | 0.82                  | 0.16                    | 0.91                        |
| 12              | 3                 | 0.64                        | 67                                 | 0.72                  | 0.20                    | 0.80                        |
| 12              | 4                 | 0.74                        | 103                                | 0.76                  | 0.23                    | 0.83                        |
| 12              | 5                 | 0.76                        | 28                                 | 0.83                  | 0.11                    | 0.91                        |
| 12              | 6                 | 0.73                        | 38                                 | 0.81                  | 0.12                    | 0.87                        |
| 12              | 7                 | 0.73                        | 27                                 | 0.79                  | 0.15                    | 0.89                        |
| 12              | 8                 | 0.69                        | 13                                 | 0.74                  | 0.20                    | 0.83                        |
| 12              | 9                 | 0.71                        | 1                                  | 0.76                  | 0.19                    | 0.82                        |
| 12              | 10                | 0.64                        | 5                                  | 0.74                  | 0.17                    | 0.78                        |
| 12              | 11                | 0.71                        | 50                                 | 0.79                  | 0.12                    | 0.86                        |
| 12              | 12                | 0.50                        | 13                                 | 0.70                  | 0.09                    | 0.76                        |
| 12              | 13                | 0.65                        | 45                                 | 0.74                  | 0.16                    | 0.81                        |
| 12              | 14                | 0.49                        | 41                                 | 0.69                  | 0.10                    | 0.76                        |

*Continued on next page*

Table S1 – *Continued from previous page*

| <b>Fault No</b> | <b>Sample Bin</b> | <b>Fault Detection Rate</b> | <b>Optimal Feature Subset Size</b> | <b>Model Accuracy</b> | <b>False Alarm Rate</b> | <b>Area Under the Curve</b> |
|-----------------|-------------------|-----------------------------|------------------------------------|-----------------------|-------------------------|-----------------------------|
| 12              | 15                | 0.58                        | 28                                 | 0.72                  | 0.13                    | 0.79                        |
| 12              | 16                | 0.56                        | 5                                  | 0.71                  | 0.13                    | 0.78                        |
| 12              | 17                | 0.52                        | 20                                 | 0.73                  | 0.06                    | 0.80                        |
| 12              | 18                | 0.60                        | 31                                 | 0.73                  | 0.13                    | 0.81                        |
| 12              | 19                | 0.62                        | 24                                 | 0.73                  | 0.16                    | 0.82                        |
| 12              | 20                | 0.45                        | 17                                 | 0.72                  | 0.01                    | 0.77                        |
| 12              | 21                | 0.65                        | 44                                 | 0.71                  | 0.23                    | 0.78                        |
| 12              | 22                | 0.63                        | 41                                 | 0.63                  | 0.37                    | 0.67                        |
| 12              | 23                | 0.58                        | 48                                 | 0.67                  | 0.25                    | 0.72                        |
| 12              | 24                | 0.61                        | 27                                 | 0.73                  | 0.15                    | 0.81                        |
| 12              | 25                | 0.62                        | 38                                 | 0.71                  | 0.19                    | 0.79                        |
| 12              | 26                | 0.63                        | 60                                 | 0.72                  | 0.18                    | 0.81                        |
| 12              | 27                | 0.60                        | 32                                 | 0.73                  | 0.15                    | 0.81                        |
| 12              | 28                | 0.63                        | 29                                 | 0.66                  | 0.30                    | 0.72                        |
| 12              | 29                | 0.64                        | 32                                 | 0.68                  | 0.28                    | 0.75                        |
| 12              | 30                | 0.67                        | 2                                  | 0.52                  | 0.64                    | 0.52                        |
| 12              | 31                | 0.48                        | 11                                 | 0.74                  | 0.00                    | 0.89                        |
| 12              | 32                | 0.49                        | 48                                 | 0.72                  | 0.06                    | 0.78                        |
| 12              | 33                | 0.66                        | 7                                  | 0.83                  | 0.00                    | 0.91                        |
| 12              | 34                | 0.54                        | 7                                  | 0.77                  | 0.00                    | 0.92                        |
| 12              | 35                | 0.65                        | 17                                 | 0.74                  | 0.18                    | 0.81                        |
| 12              | 36                | 0.68                        | 5                                  | 0.84                  | 0.00                    | 0.93                        |
| 12              | 37                | 0.59                        | 8                                  | 0.80                  | 0.00                    | 0.94                        |
| 12              | 38                | 0.59                        | 13                                 | 0.79                  | 0.00                    | 0.94                        |
| 12              | 39                | 0.60                        | 2                                  | 0.80                  | 0.00                    | 0.93                        |
| 12              | 40                | 0.66                        | 2                                  | 0.83                  | 0.00                    | 0.92                        |

*Continued on next page*

Table S1 – *Continued from previous page*

| <b>Fault No</b> | <b>Sample Bin</b> | <b>Fault Detection Rate</b> | <b>Optimal Feature Subset Size</b> | <b>Model Accuracy</b> | <b>False Alarm Rate</b> | <b>Area Under the Curve</b> |
|-----------------|-------------------|-----------------------------|------------------------------------|-----------------------|-------------------------|-----------------------------|
| 12              | 41                | 0.62                        | 13                                 | 0.81                  | 0.00                    | 0.95                        |
| 12              | 42                | 0.70                        | 5                                  | 0.85                  | 0.00                    | 0.95                        |
| 12              | 43                | 0.64                        | 2                                  | 0.82                  | 0.00                    | 0.95                        |
| 12              | 44                | 0.69                        | 2                                  | 0.84                  | 0.00                    | 0.95                        |
| 12              | 45                | 0.76                        | 6                                  | 0.88                  | 0.00                    | 0.95                        |
| 12              | 46                | 0.81                        | 6                                  | 0.90                  | 0.00                    | 0.96                        |
| 12              | 47                | 0.74                        | 6                                  | 0.87                  | 0.00                    | 0.96                        |
| 12              | 48                | 0.75                        | 7                                  | 0.88                  | 0.00                    | 0.96                        |
| 12              | 49                | 0.71                        | 4                                  | 0.85                  | 0.00                    | 0.95                        |
| 12              | 50                | 0.82                        | 12                                 | 0.91                  | 0.00                    | 0.97                        |
| 12              | 51                | 0.82                        | 4                                  | 0.91                  | 0.00                    | 0.96                        |
| 12              | 52                | 0.81                        | 9                                  | 0.91                  | 0.00                    | 0.97                        |
| 12              | 53                | 0.83                        | 5                                  | 0.92                  | 0.00                    | 0.97                        |
| 12              | 54                | 0.84                        | 7                                  | 0.92                  | 0.00                    | 0.98                        |
| 12              | 55                | 0.84                        | 6                                  | 0.92                  | 0.00                    | 0.97                        |
| 12              | 56                | 0.84                        | 2                                  | 0.92                  | 0.00                    | 0.96                        |
| 12              | 57                | 0.84                        | 4                                  | 0.92                  | 0.00                    | 0.97                        |
| 12              | 58                | 0.85                        | 3                                  | 0.92                  | 0.00                    | 0.97                        |
| 12              | 59                | 0.84                        | 3                                  | 0.92                  | 0.00                    | 0.97                        |
| 12              | 60                | 0.84                        | 3                                  | 0.92                  | 0.00                    | 0.97                        |
| 12              | 61                | 0.85                        | 1                                  | 0.93                  | 0.00                    | 0.98                        |
| 12              | 62                | 0.86                        | 8                                  | 0.93                  | 0.00                    | 0.98                        |
| 12              | 63                | 0.86                        | 1                                  | 0.93                  | 0.00                    | 0.98                        |
| 12              | 64                | 0.86                        | 5                                  | 0.93                  | 0.00                    | 0.98                        |
| 12              | 65                | 0.86                        | 9                                  | 0.93                  | 0.00                    | 0.98                        |
| 12              | 66                | 0.86                        | 3                                  | 0.93                  | 0.00                    | 0.98                        |

*Continued on next page*

Table S1 – *Continued from previous page*

| <b>Fault No</b> | <b>Sample Bin</b> | <b>Fault Detection Rate</b> | <b>Optimal Feature Subset Size</b> | <b>Model Accuracy</b> | <b>False Alarm Rate</b> | <b>Area Under the Curve</b> |
|-----------------|-------------------|-----------------------------|------------------------------------|-----------------------|-------------------------|-----------------------------|
| 12              | 67                | 0.86                        | 3                                  | 0.93                  | 0.00                    | 0.97                        |
| 12              | 68                | 0.87                        | 6                                  | 0.94                  | 0.00                    | 0.98                        |
| 12              | 69                | 0.87                        | 6                                  | 0.93                  | 0.00                    | 0.98                        |
| 12              | 70                | 0.86                        | 1                                  | 0.93                  | 0.00                    | 0.99                        |
| 12              | 71                | 0.88                        | 1                                  | 0.94                  | 0.00                    | 0.99                        |
| 12              | 72                | 0.88                        | 6                                  | 0.94                  | 0.00                    | 0.99                        |
| 12              | 73                | 0.88                        | 10                                 | 0.94                  | 0.00                    | 0.99                        |
| 12              | 74                | 0.89                        | 1                                  | 0.94                  | 0.00                    | 0.99                        |
| 12              | 75                | 0.88                        | 4                                  | 0.94                  | 0.00                    | 0.99                        |
| 12              | 76                | 0.90                        | 3                                  | 0.95                  | 0.00                    | 0.98                        |
| 12              | 77                | 0.90                        | 5                                  | 0.95                  | 0.00                    | 0.98                        |
| 12              | 78                | 0.91                        | 6                                  | 0.95                  | 0.00                    | 0.99                        |
| 12              | 79                | 0.90                        | 6                                  | 0.95                  | 0.00                    | 0.99                        |
| 12              | 80                | 0.89                        | 5                                  | 0.95                  | 0.00                    | 0.99                        |
| 12              | 81                | 0.92                        | 4                                  | 0.96                  | 0.00                    | 0.99                        |
| 12              | 82                | 0.89                        | 2                                  | 0.95                  | 0.00                    | 0.98                        |
| 12              | 83                | 0.90                        | 1                                  | 0.95                  | 0.00                    | 0.99                        |
| 12              | 84                | 0.90                        | 10                                 | 0.95                  | 0.00                    | 0.99                        |
| 12              | 85                | 0.92                        | 9                                  | 0.96                  | 0.00                    | 0.99                        |
| 12              | 86                | 0.91                        | 8                                  | 0.95                  | 0.00                    | 0.99                        |
| 12              | 87                | 0.92                        | 7                                  | 0.96                  | 0.00                    | 0.99                        |
| 12              | 88                | 0.92                        | 9                                  | 0.96                  | 0.00                    | 0.99                        |
| 12              | 89                | 0.92                        | 4                                  | 0.96                  | 0.00                    | 0.99                        |
| 12              | 90                | 0.91                        | 10                                 | 0.96                  | 0.00                    | 0.99                        |
| 12              | 91                | 0.92                        | 8                                  | 0.96                  | 0.00                    | 1.00                        |
| 12              | 92                | 0.90                        | 3                                  | 0.95                  | 0.00                    | 0.99                        |

*Continued on next page*

Table S1 – *Continued from previous page*

| <b>Fault No</b> | <b>Sample Bin</b> | <b>Fault Detection Rate</b> | <b>Optimal Feature Subset Size</b> | <b>Model Accuracy</b> | <b>False Alarm Rate</b> | <b>Area Under the Curve</b> |
|-----------------|-------------------|-----------------------------|------------------------------------|-----------------------|-------------------------|-----------------------------|
| 12              | 93                | 0.90                        | 3                                  | 0.95                  | 0.00                    | 0.99                        |
| 12              | 94                | 0.92                        | 1                                  | 0.96                  | 0.00                    | 0.99                        |
| 12              | 95                | 0.92                        | 5                                  | 0.96                  | 0.00                    | 0.99                        |
| 12              | 96                | 0.92                        | 7                                  | 0.96                  | 0.00                    | 0.99                        |
| 12              | 97                | 0.94                        | 6                                  | 0.97                  | 0.00                    | 0.99                        |
| 12              | 98                | 0.92                        | 1                                  | 0.96                  | 0.00                    | 0.99                        |
| 12              | 99                | 0.92                        | 7                                  | 0.96                  | 0.00                    | 0.99                        |
| 12              | 100               | 0.90                        | 6                                  | 0.95                  | 0.00                    | 0.99                        |
| 12              | 101               | 0.89                        | 1                                  | 0.95                  | 0.00                    | 0.99                        |
| 12              | 102               | 0.92                        | 6                                  | 0.96                  | 0.00                    | 0.99                        |
| 12              | 103               | 0.91                        | 5                                  | 0.96                  | 0.00                    | 0.99                        |
| 12              | 104               | 0.92                        | 4                                  | 0.96                  | 0.00                    | 0.99                        |
| 12              | 105               | 0.92                        | 9                                  | 0.96                  | 0.00                    | 0.99                        |
| 12              | 106               | 0.90                        | 3                                  | 0.95                  | 0.00                    | 0.99                        |
| 12              | 107               | 0.93                        | 1                                  | 0.97                  | 0.00                    | 1.00                        |
| 12              | 108               | 0.95                        | 7                                  | 0.97                  | 0.00                    | 1.00                        |
| 12              | 109               | 0.92                        | 9                                  | 0.96                  | 0.00                    | 1.00                        |
| 12              | 110               | 0.95                        | 5                                  | 0.97                  | 0.00                    | 1.00                        |
| 12              | 111               | 0.95                        | 1                                  | 0.98                  | 0.00                    | 1.00                        |
| 12              | 112               | 0.97                        | 1                                  | 0.98                  | 0.00                    | 1.00                        |
| 12              | 113               | 0.96                        | 1                                  | 0.98                  | 0.00                    | 1.00                        |
| 12              | 114               | 0.97                        | 1                                  | 0.99                  | 0.00                    | 1.00                        |
| 12              | 115               | 0.98                        | 9                                  | 0.99                  | 0.00                    | 1.00                        |
| 12              | 116               | 0.97                        | 2                                  | 0.99                  | 0.00                    | 1.00                        |
| 12              | 117               | 0.97                        | 5                                  | 0.99                  | 0.00                    | 1.00                        |
| 12              | 118               | 0.98                        | 6                                  | 0.99                  | 0.00                    | 1.00                        |

*Continued on next page*



Table S1 – *Continued from previous page*

| <b>Fault No</b> | <b>Sample Bin</b> | <b>Fault Detection Rate</b> | <b>Optimal Feature Subset Size</b> | <b>Model Accuracy</b> | <b>False Alarm Rate</b> | <b>Area Under the Curve</b> |
|-----------------|-------------------|-----------------------------|------------------------------------|-----------------------|-------------------------|-----------------------------|
| 12              | 119               | 0.99                        | 1                                  | 0.99                  | 0.00                    | 1.00                        |
| 12              | 120               | 0.99                        | 1                                  | 0.99                  | 0.00                    | 1.00                        |
| 13              | 2                 | 0.59                        | 84                                 | 0.61                  | 0.44                    | 0.65                        |
| 13              | 3                 | 0.88                        | 66                                 | 0.61                  | 0.66                    | 0.70                        |
| 13              | 4                 | 0.63                        | 52                                 | 0.58                  | 0.46                    | 0.64                        |
| 13              | 5                 | 0.70                        | 8                                  | 0.52                  | 0.73                    | 0.97                        |
| 13              | 6                 | 0.86                        | 3                                  | 0.50                  | 0.87                    | 0.69                        |
| 13              | 7                 | 0.51                        | 6                                  | 0.49                  | 0.53                    | 0.54                        |
| 13              | 8                 | 0.62                        | 3                                  | 0.50                  | 0.63                    | 0.75                        |
| 13              | 9                 | 0.69                        | 141                                | 0.51                  | 0.68                    | 0.50                        |
| 13              | 10                | 0.75                        | 1                                  | 0.61                  | 0.53                    | 0.67                        |
| 13              | 11                | 0.78                        | 3                                  | 0.74                  | 0.29                    | 0.79                        |
| 13              | 12                | 0.70                        | 1                                  | 0.67                  | 0.37                    | 0.73                        |
| 13              | 13                | 0.71                        | 17                                 | 0.70                  | 0.32                    | 0.76                        |
| 13              | 14                | 0.78                        | 29                                 | 0.78                  | 0.21                    | 0.86                        |
| 13              | 15                | 0.86                        | 1                                  | 0.52                  | 0.83                    | 0.51                        |
| 13              | 16                | 0.75                        | 15                                 | 0.78                  | 0.19                    | 0.86                        |
| 13              | 17                | 0.76                        | 24                                 | 0.80                  | 0.17                    | 0.87                        |
| 13              | 18                | 0.79                        | 32                                 | 0.79                  | 0.20                    | 0.87                        |
| 13              | 19                | 0.71                        | 26                                 | 0.73                  | 0.24                    | 0.82                        |
| 13              | 20                | 0.72                        | 56                                 | 0.73                  | 0.26                    | 0.82                        |
| 13              | 21                | 0.76                        | 27                                 | 0.77                  | 0.22                    | 0.85                        |
| 13              | 22                | 0.75                        | 59                                 | 0.75                  | 0.24                    | 0.82                        |
| 13              | 23                | 0.72                        | 55                                 | 0.74                  | 0.24                    | 0.81                        |
| 13              | 24                | 0.71                        | 14                                 | 0.74                  | 0.24                    | 0.80                        |
| 13              | 25                | 0.75                        | 45                                 | 0.77                  | 0.22                    | 0.84                        |

*Continued on next page*

Table S1 – *Continued from previous page*

| <b>Fault No</b> | <b>Sample Bin</b> | <b>Fault Detection Rate</b> | <b>Optimal Feature Subset Size</b> | <b>Model Accuracy</b> | <b>False Alarm Rate</b> | <b>Area Under the Curve</b> |
|-----------------|-------------------|-----------------------------|------------------------------------|-----------------------|-------------------------|-----------------------------|
| 13              | 26                | 0.72                        | 26                                 | 0.76                  | 0.20                    | 0.82                        |
| 13              | 27                | 0.74                        | 51                                 | 0.76                  | 0.22                    | 0.83                        |
| 13              | 28                | 0.73                        | 20                                 | 0.78                  | 0.17                    | 0.85                        |
| 13              | 29                | 0.72                        | 37                                 | 0.74                  | 0.24                    | 0.81                        |
| 13              | 30                | 0.71                        | 45                                 | 0.73                  | 0.26                    | 0.79                        |
| 13              | 31                | 0.70                        | 13                                 | 0.76                  | 0.18                    | 0.83                        |
| 13              | 32                | 0.70                        | 7                                  | 0.78                  | 0.14                    | 0.84                        |
| 13              | 33                | 0.75                        | 32                                 | 0.80                  | 0.15                    | 0.87                        |
| 13              | 34                | 0.72                        | 40                                 | 0.72                  | 0.27                    | 0.79                        |
| 13              | 35                | 0.74                        | 17                                 | 0.78                  | 0.19                    | 0.84                        |
| 13              | 36                | 0.73                        | 30                                 | 0.78                  | 0.16                    | 0.85                        |
| 13              | 37                | 0.73                        | 29                                 | 0.79                  | 0.16                    | 0.84                        |
| 13              | 38                | 0.75                        | 58                                 | 0.78                  | 0.19                    | 0.84                        |
| 13              | 39                | 0.71                        | 18                                 | 0.77                  | 0.16                    | 0.85                        |
| 13              | 40                | 0.74                        | 32                                 | 0.79                  | 0.17                    | 0.86                        |
| 13              | 41                | 0.74                        | 55                                 | 0.78                  | 0.18                    | 0.84                        |
| 13              | 42                | 0.73                        | 54                                 | 0.77                  | 0.18                    | 0.84                        |
| 13              | 43                | 0.75                        | 10                                 | 0.80                  | 0.15                    | 0.86                        |
| 13              | 44                | 0.70                        | 19                                 | 0.78                  | 0.14                    | 0.83                        |
| 13              | 45                | 0.82                        | 2                                  | 0.54                  | 0.73                    | 0.59                        |
| 13              | 46                | 0.72                        | 17                                 | 0.79                  | 0.14                    | 0.86                        |
| 13              | 47                | 0.72                        | 14                                 | 0.79                  | 0.15                    | 0.85                        |
| 13              | 48                | 0.71                        | 27                                 | 0.78                  | 0.16                    | 0.84                        |
| 13              | 49                | 0.71                        | 16                                 | 0.79                  | 0.14                    | 0.84                        |
| 13              | 50                | 0.71                        | 11                                 | 0.79                  | 0.13                    | 0.85                        |
| 13              | 51                | 0.70                        | 51                                 | 0.73                  | 0.24                    | 0.80                        |

*Continued on next page*

Table S1 – *Continued from previous page*

| <b>Fault No</b> | <b>Sample Bin</b> | <b>Fault Detection Rate</b> | <b>Optimal Feature Subset Size</b> | <b>Model Accuracy</b> | <b>False Alarm Rate</b> | <b>Area Under the Curve</b> |
|-----------------|-------------------|-----------------------------|------------------------------------|-----------------------|-------------------------|-----------------------------|
| 13              | 52                | 0.68                        | 27                                 | 0.76                  | 0.17                    | 0.83                        |
| 13              | 53                | 0.71                        | 18                                 | 0.78                  | 0.16                    | 0.84                        |
| 13              | 54                | 0.72                        | 37                                 | 0.76                  | 0.21                    | 0.82                        |
| 13              | 55                | 0.68                        | 7                                  | 0.78                  | 0.12                    | 0.84                        |
| 13              | 56                | 0.68                        | 28                                 | 0.76                  | 0.17                    | 0.83                        |
| 13              | 57                | 0.76                        | 26                                 | 0.79                  | 0.18                    | 0.86                        |
| 13              | 58                | 0.72                        | 19                                 | 0.79                  | 0.13                    | 0.86                        |
| 13              | 59                | 0.73                        | 17                                 | 0.80                  | 0.13                    | 0.86                        |
| 13              | 60                | 0.69                        | 22                                 | 0.78                  | 0.12                    | 0.85                        |
| 13              | 61                | 0.70                        | 12                                 | 0.78                  | 0.15                    | 0.85                        |
| 13              | 62                | 0.71                        | 14                                 | 0.79                  | 0.13                    | 0.86                        |
| 13              | 63                | 0.68                        | 5                                  | 0.80                  | 0.08                    | 0.85                        |
| 13              | 64                | 0.69                        | 38                                 | 0.76                  | 0.17                    | 0.83                        |
| 13              | 65                | 0.69                        | 52                                 | 0.78                  | 0.13                    | 0.84                        |
| 13              | 66                | 0.69                        | 47                                 | 0.77                  | 0.15                    | 0.84                        |
| 13              | 67                | 0.63                        | 35                                 | 0.78                  | 0.08                    | 0.84                        |
| 13              | 68                | 0.56                        | 3                                  | 0.77                  | 0.02                    | 0.86                        |
| 13              | 69                | 0.69                        | 13                                 | 0.80                  | 0.09                    | 0.87                        |
| 13              | 70                | 0.71                        | 71                                 | 0.75                  | 0.20                    | 0.83                        |
| 13              | 71                | 0.55                        | 2                                  | 0.77                  | 0.01                    | 0.86                        |
| 13              | 72                | 0.57                        | 77                                 | 0.75                  | 0.07                    | 0.80                        |
| 13              | 73                | 0.55                        | 88                                 | 0.75                  | 0.05                    | 0.79                        |
| 13              | 74                | 0.62                        | 54                                 | 0.78                  | 0.06                    | 0.83                        |
| 13              | 75                | 0.55                        | 2                                  | 0.77                  | 0.01                    | 0.86                        |
| 13              | 76                | 0.52                        | 2                                  | 0.76                  | 0.00                    | 0.86                        |
| 13              | 77                | 0.52                        | 1                                  | 0.76                  | 0.00                    | 0.81                        |

*Continued on next page*

Table S1 – *Continued from previous page*

| <b>Fault No</b> | <b>Sample Bin</b> | <b>Fault Detection Rate</b> | <b>Optimal Feature Subset Size</b> | <b>Model Accuracy</b> | <b>False Alarm Rate</b> | <b>Area Under the Curve</b> |
|-----------------|-------------------|-----------------------------|------------------------------------|-----------------------|-------------------------|-----------------------------|
| 13              | 78                | 0.58                        | 2                                  | 0.79                  | 0.01                    | 0.87                        |
| 13              | 79                | 0.53                        | 2                                  | 0.76                  | 0.01                    | 0.86                        |
| 13              | 80                | 0.62                        | 2                                  | 0.80                  | 0.03                    | 0.89                        |
| 13              | 81                | 0.52                        | 2                                  | 0.76                  | 0.01                    | 0.86                        |
| 13              | 82                | 0.53                        | 2                                  | 0.76                  | 0.01                    | 0.86                        |
| 13              | 83                | 0.57                        | 2                                  | 0.77                  | 0.02                    | 0.87                        |
| 13              | 84                | 0.55                        | 2                                  | 0.77                  | 0.01                    | 0.87                        |
| 13              | 85                | 0.57                        | 2                                  | 0.78                  | 0.01                    | 0.87                        |
| 13              | 86                | 0.84                        | 1                                  | 0.64                  | 0.56                    | 0.75                        |
| 13              | 87                | 0.66                        | 2                                  | 0.80                  | 0.06                    | 0.88                        |
| 13              | 88                | 0.57                        | 2                                  | 0.78                  | 0.01                    | 0.87                        |
| 13              | 89                | 0.58                        | 2                                  | 0.78                  | 0.02                    | 0.87                        |
| 13              | 90                | 0.55                        | 2                                  | 0.77                  | 0.01                    | 0.86                        |
| 13              | 91                | 0.59                        | 2                                  | 0.78                  | 0.03                    | 0.87                        |
| 13              | 92                | 0.59                        | 2                                  | 0.79                  | 0.01                    | 0.86                        |
| 13              | 93                | 0.55                        | 2                                  | 0.77                  | 0.01                    | 0.86                        |
| 13              | 94                | 0.58                        | 2                                  | 0.78                  | 0.02                    | 0.88                        |
| 13              | 95                | 0.59                        | 2                                  | 0.79                  | 0.01                    | 0.87                        |
| 13              | 96                | 0.60                        | 2                                  | 0.79                  | 0.02                    | 0.87                        |
| 13              | 97                | 0.62                        | 2                                  | 0.80                  | 0.03                    | 0.88                        |
| 13              | 98                | 0.53                        | 2                                  | 0.76                  | 0.01                    | 0.86                        |
| 13              | 99                | 0.58                        | 2                                  | 0.78                  | 0.02                    | 0.88                        |
| 13              | 100               | 0.61                        | 2                                  | 0.79                  | 0.04                    | 0.87                        |
| 13              | 101               | 0.62                        | 2                                  | 0.80                  | 0.03                    | 0.87                        |
| 13              | 102               | 0.60                        | 2                                  | 0.79                  | 0.01                    | 0.87                        |
| 13              | 103               | 0.58                        | 2                                  | 0.78                  | 0.02                    | 0.87                        |

*Continued on next page*

Table S1 – *Continued from previous page*

| <b>Fault No</b> | <b>Sample Bin</b> | <b>Fault Detection Rate</b> | <b>Optimal Feature Subset Size</b> | <b>Model Accuracy</b> | <b>False Alarm Rate</b> | <b>Area Under the Curve</b> |
|-----------------|-------------------|-----------------------------|------------------------------------|-----------------------|-------------------------|-----------------------------|
| 13              | 104               | 0.58                        | 2                                  | 0.79                  | 0.00                    | 0.88                        |
| 13              | 105               | 0.58                        | 2                                  | 0.79                  | 0.01                    | 0.88                        |
| 13              | 106               | 0.60                        | 2                                  | 0.79                  | 0.02                    | 0.86                        |
| 13              | 107               | 0.72                        | 60                                 | 0.79                  | 0.14                    | 0.86                        |
| 13              | 108               | 0.65                        | 2                                  | 0.81                  | 0.03                    | 0.87                        |
| 13              | 109               | 0.64                        | 2                                  | 0.80                  | 0.03                    | 0.88                        |
| 13              | 110               | 0.65                        | 4                                  | 0.79                  | 0.07                    | 0.88                        |
| 13              | 111               | 0.69                        | 29                                 | 0.81                  | 0.08                    | 0.87                        |
| 13              | 112               | 0.75                        | 25                                 | 0.82                  | 0.11                    | 0.89                        |
| 13              | 113               | 0.74                        | 9                                  | 0.82                  | 0.10                    | 0.88                        |
| 13              | 114               | 0.73                        | 27                                 | 0.81                  | 0.11                    | 0.87                        |
| 13              | 115               | 0.85                        | 1                                  | 0.60                  | 0.66                    | 0.72                        |
| 13              | 116               | 0.72                        | 69                                 | 0.79                  | 0.14                    | 0.86                        |
| 13              | 117               | 0.65                        | 3                                  | 0.81                  | 0.04                    | 0.88                        |
| 13              | 118               | 0.73                        | 38                                 | 0.80                  | 0.13                    | 0.87                        |
| 13              | 119               | 0.73                        | 47                                 | 0.81                  | 0.11                    | 0.87                        |
| 13              | 120               | 0.84                        | 1                                  | 0.63                  | 0.58                    | 0.74                        |
| 14              | 2                 | 0.62                        | 13                                 | 0.70                  | 0.23                    | 0.75                        |
| 14              | 3                 | 0.57                        | 22                                 | 0.54                  | 0.49                    | 0.55                        |
| 14              | 4                 | 0.76                        | 1                                  | 0.60                  | 0.57                    | 0.62                        |
| 14              | 5                 | 0.91                        | 3                                  | 0.51                  | 0.97                    | 0.99                        |
| 14              | 6                 | 0.63                        | 11                                 | 0.47                  | 0.68                    | 0.46                        |
| 14              | 7                 | 0.67                        | 10                                 | 0.66                  | 0.35                    | 0.70                        |
| 14              | 8                 | 0.52                        | 1                                  | 0.48                  | 0.56                    | 0.46                        |
| 14              | 9                 | 0.62                        | 20                                 | 0.62                  | 0.38                    | 0.67                        |
| 14              | 10                | 0.82                        | 1                                  | 0.62                  | 0.57                    | 0.67                        |

*Continued on next page*

Table S1 – *Continued from previous page*

| <b>Fault No</b> | <b>Sample Bin</b> | <b>Fault Detection Rate</b> | <b>Optimal Feature Subset Size</b> | <b>Model Accuracy</b> | <b>False Alarm Rate</b> | <b>Area Under the Curve</b> |
|-----------------|-------------------|-----------------------------|------------------------------------|-----------------------|-------------------------|-----------------------------|
| 14              | 11                | 0.75                        | 15                                 | 0.75                  | 0.25                    | 0.84                        |
| 14              | 12                | 0.80                        | 16                                 | 0.78                  | 0.25                    | 0.87                        |
| 14              | 13                | 0.81                        | 42                                 | 0.81                  | 0.20                    | 0.88                        |
| 14              | 14                | 0.82                        | 18                                 | 0.82                  | 0.18                    | 0.90                        |
| 14              | 15                | 0.83                        | 44                                 | 0.84                  | 0.15                    | 0.91                        |
| 14              | 16                | 0.85                        | 30                                 | 0.86                  | 0.13                    | 0.93                        |
| 14              | 17                | 0.87                        | 26                                 | 0.87                  | 0.13                    | 0.94                        |
| 14              | 18                | 0.81                        | 15                                 | 0.86                  | 0.09                    | 0.92                        |
| 14              | 19                | 0.84                        | 23                                 | 0.87                  | 0.11                    | 0.93                        |
| 14              | 20                | 0.79                        | 40                                 | 0.85                  | 0.09                    | 0.92                        |
| 14              | 21                | 0.83                        | 38                                 | 0.83                  | 0.17                    | 0.91                        |
| 14              | 22                | 0.78                        | 19                                 | 0.80                  | 0.18                    | 0.86                        |
| 14              | 23                | 0.78                        | 10                                 | 0.83                  | 0.12                    | 0.89                        |
| 14              | 24                | 0.78                        | 11                                 | 0.81                  | 0.15                    | 0.88                        |
| 14              | 25                | 0.78                        | 24                                 | 0.81                  | 0.16                    | 0.88                        |
| 14              | 26                | 0.79                        | 25                                 | 0.81                  | 0.16                    | 0.89                        |
| 14              | 27                | 0.80                        | 22                                 | 0.83                  | 0.14                    | 0.90                        |
| 14              | 28                | 0.78                        | 37                                 | 0.79                  | 0.20                    | 0.85                        |
| 14              | 29                | 0.80                        | 11                                 | 0.84                  | 0.12                    | 0.90                        |
| 14              | 30                | 0.78                        | 10                                 | 0.83                  | 0.12                    | 0.89                        |
| 14              | 31                | 0.80                        | 7                                  | 0.84                  | 0.12                    | 0.89                        |
| 14              | 32                | 0.80                        | 38                                 | 0.83                  | 0.14                    | 0.90                        |
| 14              | 33                | 0.84                        | 32                                 | 0.86                  | 0.11                    | 0.92                        |
| 14              | 34                | 0.80                        | 33                                 | 0.85                  | 0.09                    | 0.91                        |
| 14              | 35                | 0.81                        | 34                                 | 0.82                  | 0.16                    | 0.89                        |
| 14              | 36                | 0.79                        | 29                                 | 0.84                  | 0.11                    | 0.90                        |

*Continued on next page*

Table S1 – *Continued from previous page*

| <b>Fault No</b> | <b>Sample Bin</b> | <b>Fault Detection Rate</b> | <b>Optimal Feature Subset Size</b> | <b>Model Accuracy</b> | <b>False Alarm Rate</b> | <b>Area Under the Curve</b> |
|-----------------|-------------------|-----------------------------|------------------------------------|-----------------------|-------------------------|-----------------------------|
| 14              | 37                | 0.79                        | 44                                 | 0.84                  | 0.11                    | 0.90                        |
| 14              | 38                | 0.82                        | 23                                 | 0.84                  | 0.13                    | 0.90                        |
| 14              | 39                | 0.78                        | 8                                  | 0.84                  | 0.10                    | 0.90                        |
| 14              | 40                | 0.80                        | 23                                 | 0.85                  | 0.11                    | 0.91                        |
| 14              | 41                | 0.82                        | 24                                 | 0.86                  | 0.11                    | 0.92                        |
| 14              | 42                | 0.80                        | 17                                 | 0.84                  | 0.12                    | 0.91                        |
| 14              | 43                | 0.82                        | 22                                 | 0.85                  | 0.11                    | 0.91                        |
| 14              | 44                | 0.82                        | 27                                 | 0.84                  | 0.14                    | 0.91                        |
| 14              | 45                | 0.78                        | 14                                 | 0.83                  | 0.11                    | 0.91                        |
| 14              | 46                | 0.80                        | 18                                 | 0.84                  | 0.12                    | 0.90                        |
| 14              | 47                | 0.78                        | 30                                 | 0.83                  | 0.11                    | 0.89                        |
| 14              | 48                | 0.79                        | 11                                 | 0.86                  | 0.07                    | 0.91                        |
| 14              | 49                | 0.83                        | 10                                 | 0.88                  | 0.08                    | 0.92                        |
| 14              | 50                | 0.80                        | 16                                 | 0.84                  | 0.12                    | 0.91                        |
| 14              | 51                | 0.80                        | 8                                  | 0.85                  | 0.10                    | 0.91                        |
| 14              | 52                | 0.77                        | 11                                 | 0.85                  | 0.08                    | 0.90                        |
| 14              | 53                | 0.79                        | 11                                 | 0.85                  | 0.08                    | 0.91                        |
| 14              | 54                | 0.77                        | 21                                 | 0.80                  | 0.16                    | 0.88                        |
| 14              | 55                | 0.77                        | 21                                 | 0.83                  | 0.11                    | 0.89                        |
| 14              | 56                | 0.76                        | 5                                  | 0.83                  | 0.11                    | 0.89                        |
| 14              | 57                | 0.80                        | 8                                  | 0.86                  | 0.08                    | 0.92                        |
| 14              | 58                | 0.80                        | 4                                  | 0.86                  | 0.07                    | 0.92                        |
| 14              | 59                | 0.79                        | 12                                 | 0.84                  | 0.11                    | 0.90                        |
| 14              | 60                | 0.83                        | 6                                  | 0.87                  | 0.08                    | 0.92                        |
| 14              | 61                | 0.81                        | 12                                 | 0.86                  | 0.09                    | 0.92                        |
| 14              | 62                | 0.80                        | 10                                 | 0.85                  | 0.10                    | 0.91                        |

*Continued on next page*

Table S1 – *Continued from previous page*

| <b>Fault No</b> | <b>Sample Bin</b> | <b>Fault Detection Rate</b> | <b>Optimal Feature Subset Size</b> | <b>Model Accuracy</b> | <b>False Alarm Rate</b> | <b>Area Under the Curve</b> |
|-----------------|-------------------|-----------------------------|------------------------------------|-----------------------|-------------------------|-----------------------------|
| 14              | 63                | 0.80                        | 3                                  | 0.85                  | 0.09                    | 0.91                        |
| 14              | 64                | 0.79                        | 4                                  | 0.85                  | 0.09                    | 0.91                        |
| 14              | 65                | 0.78                        | 4                                  | 0.85                  | 0.08                    | 0.91                        |
| 14              | 66                | 0.78                        | 16                                 | 0.83                  | 0.12                    | 0.89                        |
| 14              | 67                | 0.81                        | 5                                  | 0.86                  | 0.09                    | 0.92                        |
| 14              | 68                | 0.79                        | 14                                 | 0.83                  | 0.12                    | 0.90                        |
| 14              | 69                | 0.80                        | 7                                  | 0.86                  | 0.09                    | 0.91                        |
| 14              | 70                | 0.80                        | 21                                 | 0.86                  | 0.09                    | 0.91                        |
| 14              | 71                | 0.77                        | 5                                  | 0.85                  | 0.08                    | 0.90                        |
| 14              | 72                | 0.80                        | 4                                  | 0.86                  | 0.07                    | 0.92                        |
| 14              | 73                | 0.78                        | 16                                 | 0.84                  | 0.09                    | 0.90                        |
| 14              | 74                | 0.76                        | 30                                 | 0.82                  | 0.11                    | 0.88                        |
| 14              | 75                | 0.80                        | 7                                  | 0.85                  | 0.10                    | 0.92                        |
| 14              | 76                | 0.79                        | 3                                  | 0.86                  | 0.07                    | 0.92                        |
| 14              | 77                | 0.77                        | 3                                  | 0.85                  | 0.06                    | 0.91                        |
| 14              | 78                | 0.79                        | 3                                  | 0.86                  | 0.06                    | 0.92                        |
| 14              | 79                | 0.79                        | 9                                  | 0.84                  | 0.11                    | 0.90                        |
| 14              | 80                | 0.79                        | 7                                  | 0.86                  | 0.08                    | 0.92                        |
| 14              | 81                | 0.80                        | 4                                  | 0.86                  | 0.08                    | 0.92                        |
| 14              | 82                | 0.81                        | 4                                  | 0.86                  | 0.09                    | 0.92                        |
| 14              | 83                | 0.81                        | 3                                  | 0.86                  | 0.09                    | 0.92                        |
| 14              | 84                | 0.80                        | 11                                 | 0.86                  | 0.09                    | 0.92                        |
| 14              | 85                | 0.80                        | 3                                  | 0.87                  | 0.07                    | 0.92                        |
| 14              | 86                | 0.80                        | 6                                  | 0.86                  | 0.07                    | 0.92                        |
| 14              | 87                | 0.77                        | 3                                  | 0.85                  | 0.07                    | 0.92                        |
| 14              | 88                | 0.78                        | 4                                  | 0.85                  | 0.08                    | 0.92                        |

*Continued on next page*



Table S1 – *Continued from previous page*

| <b>Fault No</b> | <b>Sample Bin</b> | <b>Fault Detection Rate</b> | <b>Optimal Feature Subset Size</b> | <b>Model Accuracy</b> | <b>False Alarm Rate</b> | <b>Area Under the Curve</b> |
|-----------------|-------------------|-----------------------------|------------------------------------|-----------------------|-------------------------|-----------------------------|
| 14              | 89                | 0.79                        | 3                                  | 0.86                  | 0.08                    | 0.92                        |
| 14              | 90                | 0.76                        | 2                                  | 0.85                  | 0.06                    | 0.92                        |
| 14              | 91                | 0.77                        | 7                                  | 0.84                  | 0.09                    | 0.91                        |
| 14              | 92                | 0.76                        | 5                                  | 0.85                  | 0.06                    | 0.91                        |
| 14              | 93                | 0.79                        | 5                                  | 0.86                  | 0.08                    | 0.92                        |
| 14              | 94                | 0.81                        | 13                                 | 0.86                  | 0.09                    | 0.92                        |
| 14              | 95                | 0.80                        | 11                                 | 0.85                  | 0.10                    | 0.91                        |
| 14              | 96                | 0.80                        | 10                                 | 0.85                  | 0.10                    | 0.92                        |
| 14              | 97                | 0.80                        | 23                                 | 0.83                  | 0.14                    | 0.91                        |
| 14              | 98                | 0.78                        | 11                                 | 0.84                  | 0.10                    | 0.91                        |
| 14              | 99                | 0.80                        | 6                                  | 0.85                  | 0.09                    | 0.92                        |
| 14              | 100               | 0.79                        | 8                                  | 0.85                  | 0.10                    | 0.92                        |
| 14              | 101               | 0.80                        | 4                                  | 0.86                  | 0.08                    | 0.92                        |
| 14              | 102               | 0.81                        | 6                                  | 0.87                  | 0.08                    | 0.93                        |
| 14              | 103               | 0.82                        | 3                                  | 0.88                  | 0.07                    | 0.93                        |
| 14              | 104               | 0.80                        | 11                                 | 0.86                  | 0.09                    | 0.92                        |
| 14              | 105               | 0.80                        | 9                                  | 0.86                  | 0.08                    | 0.92                        |
| 14              | 106               | 0.80                        | 4                                  | 0.86                  | 0.08                    | 0.92                        |
| 14              | 107               | 0.81                        | 6                                  | 0.86                  | 0.09                    | 0.92                        |
| 14              | 108               | 0.81                        | 28                                 | 0.85                  | 0.10                    | 0.92                        |
| 14              | 109               | 0.81                        | 28                                 | 0.86                  | 0.10                    | 0.92                        |
| 14              | 110               | 0.83                        | 2                                  | 0.87                  | 0.09                    | 0.93                        |
| 14              | 111               | 0.84                        | 1                                  | 0.64                  | 0.57                    | 0.74                        |
| 14              | 112               | 0.83                        | 19                                 | 0.87                  | 0.09                    | 0.94                        |
| 14              | 113               | 0.83                        | 5                                  | 0.87                  | 0.10                    | 0.93                        |
| 14              | 114               | 0.81                        | 18                                 | 0.86                  | 0.10                    | 0.92                        |

*Continued on next page*

Table S1 – *Continued from previous page*

| <b>Fault No</b> | <b>Sample Bin</b> | <b>Fault Detection Rate</b> | <b>Optimal Feature Subset Size</b> | <b>Model Accuracy</b> | <b>False Alarm Rate</b> | <b>Area Under the Curve</b> |
|-----------------|-------------------|-----------------------------|------------------------------------|-----------------------|-------------------------|-----------------------------|
| 14              | 115               | 0.83                        | 7                                  | 0.87                  | 0.10                    | 0.93                        |
| 14              | 116               | 0.82                        | 16                                 | 0.87                  | 0.09                    | 0.93                        |
| 14              | 117               | 0.82                        | 5                                  | 0.87                  | 0.08                    | 0.93                        |
| 14              | 118               | 0.83                        | 10                                 | 0.87                  | 0.09                    | 0.93                        |
| 14              | 119               | 0.81                        | 9                                  | 0.86                  | 0.09                    | 0.93                        |
| 14              | 120               | 0.84                        | 7                                  | 0.87                  | 0.10                    | 0.94                        |
| 15              | 2                 | 0.71                        | 40                                 | 0.69                  | 0.32                    | 0.76                        |
| 15              | 3                 | 0.64                        | 108                                | 0.54                  | 0.59                    | 0.57                        |
| 15              | 4                 | 0.70                        | 42                                 | 0.64                  | 0.43                    | 0.71                        |
| 15              | 5                 | 0.62                        | 63                                 | 0.64                  | 0.34                    | 0.67                        |
| 15              | 6                 | 0.73                        | 70                                 | 0.62                  | 0.49                    | 0.67                        |
| 15              | 7                 | 0.69                        | 76                                 | 0.63                  | 0.43                    | 0.67                        |
| 15              | 8                 | 0.61                        | 3                                  | 0.49                  | 0.63                    | 0.52                        |
| 15              | 9                 | 0.74                        | 4                                  | 0.50                  | 0.74                    | 0.50                        |
| 15              | 10                | 0.68                        | 6                                  | 0.65                  | 0.39                    | 0.67                        |
| 15              | 11                | 0.72                        | 53                                 | 0.62                  | 0.47                    | 0.65                        |
| 15              | 12                | 0.53                        | 53                                 | 0.52                  | 0.50                    | 0.54                        |
| 15              | 13                | 0.71                        | 34                                 | 0.67                  | 0.36                    | 0.73                        |
| 15              | 14                | 0.48                        | 52                                 | 0.55                  | 0.37                    | 0.58                        |
| 15              | 15                | 0.61                        | 33                                 | 0.60                  | 0.40                    | 0.64                        |
| 15              | 16                | 0.60                        | 28                                 | 0.59                  | 0.41                    | 0.64                        |
| 15              | 17                | 0.66                        | 41                                 | 0.63                  | 0.40                    | 0.67                        |
| 15              | 18                | 0.63                        | 33                                 | 0.61                  | 0.40                    | 0.67                        |
| 15              | 19                | 0.66                        | 26                                 | 0.64                  | 0.37                    | 0.69                        |
| 15              | 20                | 0.74                        | 99                                 | 0.61                  | 0.53                    | 0.65                        |
| 15              | 21                | 0.59                        | 23                                 | 0.59                  | 0.41                    | 0.64                        |

*Continued on next page*

Table S1 – *Continued from previous page*

| <b>Fault No</b> | <b>Sample Bin</b> | <b>Fault Detection Rate</b> | <b>Optimal Feature Subset Size</b> | <b>Model Accuracy</b> | <b>False Alarm Rate</b> | <b>Area Under the Curve</b> |
|-----------------|-------------------|-----------------------------|------------------------------------|-----------------------|-------------------------|-----------------------------|
| 15              | 22                | 0.73                        | 29                                 | 0.73                  | 0.28                    | 0.80                        |
| 15              | 23                | 0.69                        | 35                                 | 0.69                  | 0.30                    | 0.76                        |
| 15              | 24                | 0.73                        | 14                                 | 0.76                  | 0.22                    | 0.83                        |
| 15              | 25                | 0.75                        | 6                                  | 0.77                  | 0.20                    | 0.84                        |
| 15              | 26                | 0.76                        | 26                                 | 0.79                  | 0.19                    | 0.85                        |
| 15              | 27                | 0.77                        | 40                                 | 0.79                  | 0.18                    | 0.88                        |
| 15              | 28                | 0.78                        | 12                                 | 0.78                  | 0.22                    | 0.85                        |
| 15              | 29                | 0.79                        | 36                                 | 0.83                  | 0.14                    | 0.90                        |
| 15              | 30                | 0.81                        | 30                                 | 0.83                  | 0.15                    | 0.91                        |
| 15              | 31                | 0.80                        | 6                                  | 0.83                  | 0.14                    | 0.91                        |
| 15              | 32                | 0.79                        | 31                                 | 0.84                  | 0.12                    | 0.91                        |
| 15              | 33                | 0.83                        | 17                                 | 0.86                  | 0.11                    | 0.92                        |
| 15              | 34                | 0.78                        | 26                                 | 0.84                  | 0.10                    | 0.92                        |
| 15              | 35                | 0.82                        | 25                                 | 0.86                  | 0.10                    | 0.93                        |
| 15              | 36                | 0.79                        | 39                                 | 0.85                  | 0.09                    | 0.92                        |
| 15              | 37                | 0.81                        | 8                                  | 0.86                  | 0.08                    | 0.93                        |
| 15              | 38                | 0.80                        | 29                                 | 0.87                  | 0.06                    | 0.93                        |
| 15              | 39                | 0.82                        | 23                                 | 0.88                  | 0.07                    | 0.95                        |
| 15              | 40                | 0.81                        | 31                                 | 0.88                  | 0.04                    | 0.94                        |
| 15              | 41                | 0.87                        | 32                                 | 0.90                  | 0.07                    | 0.96                        |
| 15              | 42                | 0.86                        | 16                                 | 0.90                  | 0.06                    | 0.96                        |
| 15              | 43                | 0.88                        | 15                                 | 0.91                  | 0.06                    | 0.97                        |
| 15              | 44                | 0.86                        | 39                                 | 0.90                  | 0.06                    | 0.96                        |
| 15              | 45                | 0.88                        | 27                                 | 0.92                  | 0.05                    | 0.97                        |
| 15              | 46                | 0.87                        | 31                                 | 0.92                  | 0.03                    | 0.97                        |
| 15              | 47                | 0.85                        | 48                                 | 0.91                  | 0.04                    | 0.96                        |

*Continued on next page*

Table S1 – *Continued from previous page*

| <b>Fault No</b> | <b>Sample Bin</b> | <b>Fault Detection Rate</b> | <b>Optimal Feature Subset Size</b> | <b>Model Accuracy</b> | <b>False Alarm Rate</b> | <b>Area Under the Curve</b> |
|-----------------|-------------------|-----------------------------|------------------------------------|-----------------------|-------------------------|-----------------------------|
| 15              | 48                | 0.89                        | 18                                 | 0.93                  | 0.03                    | 0.98                        |
| 15              | 49                | 0.89                        | 16                                 | 0.93                  | 0.03                    | 0.98                        |
| 15              | 50                | 0.89                        | 2                                  | 0.93                  | 0.03                    | 0.97                        |
| 15              | 51                | 0.90                        | 11                                 | 0.93                  | 0.04                    | 0.98                        |
| 15              | 52                | 0.93                        | 47                                 | 0.95                  | 0.03                    | 0.99                        |
| 15              | 53                | 0.90                        | 2                                  | 0.93                  | 0.04                    | 0.97                        |
| 15              | 54                | 0.91                        | 36                                 | 0.93                  | 0.05                    | 0.98                        |
| 15              | 55                | 0.94                        | 52                                 | 0.96                  | 0.02                    | 0.99                        |
| 15              | 56                | 0.94                        | 67                                 | 0.96                  | 0.02                    | 0.99                        |
| 15              | 57                | 0.94                        | 39                                 | 0.97                  | 0.01                    | 0.99                        |
| 15              | 58                | 0.97                        | 24                                 | 0.98                  | 0.01                    | 0.99                        |
| 15              | 59                | 0.96                        | 35                                 | 0.97                  | 0.01                    | 0.99                        |
| 15              | 60                | 0.97                        | 43                                 | 0.98                  | 0.01                    | 0.99                        |
| 15              | 61                | 0.97                        | 55                                 | 0.98                  | 0.01                    | 1.00                        |
| 15              | 62                | 0.97                        | 15                                 | 0.98                  | 0.01                    | 1.00                        |
| 15              | 63                | 0.99                        | 46                                 | 0.99                  | 0.00                    | 1.00                        |
| 15              | 64                | 0.98                        | 42                                 | 0.99                  | 0.00                    | 0.99                        |
| 15              | 65                | 0.97                        | 14                                 | 0.98                  | 0.01                    | 0.99                        |
| 15              | 66                | 0.98                        | 82                                 | 0.99                  | 0.00                    | 1.00                        |
| 15              | 67                | 0.99                        | 29                                 | 0.99                  | 0.00                    | 1.00                        |
| 15              | 68                | 0.98                        | 58                                 | 0.99                  | 0.00                    | 1.00                        |
| 15              | 69                | 0.98                        | 55                                 | 0.99                  | 0.00                    | 1.00                        |
| 15              | 70                | 0.98                        | 56                                 | 0.99                  | 0.00                    | 0.99                        |
| 15              | 71                | 0.97                        | 39                                 | 0.98                  | 0.00                    | 0.99                        |
| 15              | 72                | 0.97                        | 40                                 | 0.99                  | 0.00                    | 1.00                        |
| 15              | 73                | 0.97                        | 54                                 | 0.99                  | 0.00                    | 0.99                        |

*Continued on next page*

Table S1 – *Continued from previous page*

| <b>Fault No</b> | <b>Sample Bin</b> | <b>Fault Detection Rate</b> | <b>Optimal Feature Subset Size</b> | <b>Model Accuracy</b> | <b>False Alarm Rate</b> | <b>Area Under the Curve</b> |
|-----------------|-------------------|-----------------------------|------------------------------------|-----------------------|-------------------------|-----------------------------|
| 15              | 74                | 0.96                        | 32                                 | 0.98                  | 0.00                    | 0.99                        |
| 15              | 75                | 0.97                        | 74                                 | 0.99                  | 0.00                    | 0.99                        |
| 15              | 76                | 0.97                        | 51                                 | 0.99                  | 0.00                    | 0.99                        |
| 15              | 77                | 0.98                        | 50                                 | 0.99                  | 0.00                    | 1.00                        |
| 15              | 78                | 0.97                        | 57                                 | 0.99                  | 0.00                    | 0.99                        |
| 15              | 79                | 0.98                        | 38                                 | 0.99                  | 0.00                    | 1.00                        |
| 15              | 80                | 0.98                        | 68                                 | 0.99                  | 0.00                    | 1.00                        |
| 15              | 81                | 0.99                        | 31                                 | 0.99                  | 0.00                    | 1.00                        |
| 15              | 82                | 0.98                        | 67                                 | 0.99                  | 0.00                    | 1.00                        |
| 15              | 83                | 0.97                        | 26                                 | 0.98                  | 0.00                    | 0.99                        |
| 15              | 84                | 0.98                        | 44                                 | 0.99                  | 0.00                    | 1.00                        |
| 15              | 85                | 0.98                        | 48                                 | 0.99                  | 0.00                    | 1.00                        |
| 15              | 86                | 0.98                        | 83                                 | 0.99                  | 0.00                    | 1.00                        |
| 15              | 87                | 0.98                        | 47                                 | 0.99                  | 0.00                    | 1.00                        |
| 15              | 88                | 0.98                        | 84                                 | 0.99                  | 0.00                    | 1.00                        |
| 15              | 89                | 0.98                        | 36                                 | 0.99                  | 0.00                    | 1.00                        |
| 15              | 90                | 0.98                        | 31                                 | 0.99                  | 0.00                    | 1.00                        |
| 15              | 91                | 0.98                        | 17                                 | 0.99                  | 0.00                    | 0.99                        |
| 15              | 92                | 0.98                        | 12                                 | 0.99                  | 0.00                    | 1.00                        |
| 15              | 93                | 0.98                        | 79                                 | 0.99                  | 0.00                    | 1.00                        |
| 15              | 94                | 0.97                        | 31                                 | 0.99                  | 0.00                    | 1.00                        |
| 15              | 95                | 0.97                        | 53                                 | 0.98                  | 0.00                    | 1.00                        |
| 15              | 96                | 0.98                        | 42                                 | 0.99                  | 0.00                    | 1.00                        |
| 15              | 97                | 0.97                        | 13                                 | 0.99                  | 0.00                    | 1.00                        |
| 15              | 98                | 0.97                        | 57                                 | 0.99                  | 0.00                    | 1.00                        |
| 15              | 99                | 0.98                        | 30                                 | 0.99                  | 0.00                    | 1.00                        |

*Continued on next page*

Table S1 – *Continued from previous page*

| <b>Fault No</b> | <b>Sample Bin</b> | <b>Fault Detection Rate</b> | <b>Optimal Feature Subset Size</b> | <b>Model Accuracy</b> | <b>False Alarm Rate</b> | <b>Area Under the Curve</b> |
|-----------------|-------------------|-----------------------------|------------------------------------|-----------------------|-------------------------|-----------------------------|
| 15              | 100               | 0.98                        | 56                                 | 0.99                  | 0.00                    | 1.00                        |
| 15              | 101               | 0.98                        | 34                                 | 0.99                  | 0.01                    | 1.00                        |
| 15              | 102               | 0.97                        | 60                                 | 0.99                  | 0.00                    | 1.00                        |
| 15              | 103               | 0.98                        | 53                                 | 0.99                  | 0.00                    | 1.00                        |
| 15              | 104               | 0.98                        | 29                                 | 0.99                  | 0.01                    | 1.00                        |
| 15              | 105               | 0.97                        | 37                                 | 0.99                  | 0.00                    | 1.00                        |
| 15              | 106               | 0.98                        | 47                                 | 0.99                  | 0.00                    | 1.00                        |
| 15              | 107               | 0.98                        | 60                                 | 0.99                  | 0.00                    | 1.00                        |
| 15              | 108               | 0.98                        | 4                                  | 0.99                  | 0.00                    | 1.00                        |
| 15              | 109               | 0.99                        | 44                                 | 0.99                  | 0.00                    | 1.00                        |
| 15              | 110               | 0.99                        | 32                                 | 0.99                  | 0.00                    | 1.00                        |
| 15              | 111               | 0.99                        | 42                                 | 0.99                  | 0.00                    | 1.00                        |
| 15              | 112               | 0.99                        | 55                                 | 0.99                  | 0.00                    | 1.00                        |
| 15              | 113               | 0.99                        | 39                                 | 1.00                  | 0.00                    | 1.00                        |
| 15              | 114               | 0.99                        | 44                                 | 1.00                  | 0.00                    | 1.00                        |
| 15              | 115               | 0.99                        | 45                                 | 1.00                  | 0.00                    | 1.00                        |
| 15              | 116               | 1.00                        | 75                                 | 1.00                  | 0.00                    | 1.00                        |
| 15              | 117               | 0.99                        | 55                                 | 1.00                  | 0.00                    | 1.00                        |
| 15              | 118               | 0.99                        | 67                                 | 1.00                  | 0.00                    | 1.00                        |
| 15              | 119               | 1.00                        | 65                                 | 1.00                  | 0.00                    | 1.00                        |
| 15              | 120               | 1.00                        | 10                                 | 1.00                  | 0.00                    | 1.00                        |

Table S2: Fault & Time-specific Model Performances with respect to the Two-step Rolling Time Horizon Approach. The alternative models can be provided upon request.

| <b>Fault No</b> | <b>Sample Bin</b> | <b>Fault Detection Rate</b> | <b>Optimal Feature Subset Size</b> | <b>Model Accuracy</b> | <b>False Alarm Rate</b> | <b>Area Under the Curve</b> |
|-----------------|-------------------|-----------------------------|------------------------------------|-----------------------|-------------------------|-----------------------------|
| 1               | 2-3               | 0.94                        | 47                                 | 0.86                  | 0.22                    | 0.93                        |
| 1               | 3-4               | 0.80                        | 8                                  | 0.73                  | 0.34                    | 0.78                        |
| 1               | 4-5               | 0.77                        | 10                                 | 0.72                  | 0.34                    | 0.78                        |
| 1               | 5-6               | 0.77                        | 13                                 | 0.71                  | 0.35                    | 0.78                        |
| 1               | 6-7               | 0.73                        | 27                                 | 0.69                  | 0.34                    | 0.75                        |
| 1               | 7-8               | 0.70                        | 29                                 | 0.65                  | 0.40                    | 0.72                        |
| 1               | 8-9               | 0.70                        | 21                                 | 0.69                  | 0.33                    | 0.75                        |
| 1               | 9-10              | 0.66                        | 8                                  | 0.49                  | 0.69                    | 0.50                        |
| 1               | 10-11             | 0.70                        | 9                                  | 0.63                  | 0.45                    | 0.66                        |
| 1               | 11-12             | 0.65                        | 14                                 | 0.62                  | 0.42                    | 0.67                        |
| 1               | 12-13             | 0.72                        | 1                                  | 0.55                  | 0.61                    | 0.56                        |
| 1               | 13-14             | 0.62                        | 53                                 | 0.57                  | 0.49                    | 0.58                        |
| 1               | 14-15             | 0.62                        | 3                                  | 0.54                  | 0.55                    | 0.56                        |
| 1               | 15-16             | 0.76                        | 1                                  | 0.57                  | 0.63                    | 0.57                        |
| 1               | 16-17             | 0.62                        | 250                                | 0.52                  | 0.59                    | 0.53                        |
| 1               | 17-18             | 0.61                        | 53                                 | 0.61                  | 0.38                    | 0.67                        |
| 1               | 18-19             | 0.67                        | 2                                  | 0.53                  | 0.61                    | 0.55                        |
| 1               | 19-20             | 0.64                        | 8                                  | 0.59                  | 0.46                    | 0.63                        |
| 1               | 20-21             | 0.60                        | 47                                 | 0.60                  | 0.39                    | 0.64                        |
| 1               | 21-22             | 0.66                        | 133                                | 0.66                  | 0.33                    | 0.73                        |
| 1               | 22-23             | 0.65                        | 215                                | 0.64                  | 0.36                    | 0.71                        |
| 1               | 23-24             | 0.67                        | 39                                 | 0.72                  | 0.24                    | 0.79                        |
| 1               | 24-25             | 0.70                        | 65                                 | 0.72                  | 0.25                    | 0.81                        |
| 1               | 25-26             | 0.72                        | 45                                 | 0.74                  | 0.24                    | 0.83                        |

*Continued on next page*

Table S2 – Continued from previous page

| <b>Fault No</b> | <b>Sample Bin</b> | <b>Fault Detection Rate</b> | <b>Optimal Feature Subset Size</b> | <b>Model Accuracy</b> | <b>False Alarm Rate</b> | <b>Area Under the Curve</b> |
|-----------------|-------------------|-----------------------------|------------------------------------|-----------------------|-------------------------|-----------------------------|
| 1               | 26-27             | 0.68                        | 47                                 | 0.74                  | 0.19                    | 0.83                        |
| 1               | 27-28             | 0.66                        | 42                                 | 0.74                  | 0.19                    | 0.83                        |
| 1               | 28-29             | 0.68                        | 74                                 | 0.75                  | 0.17                    | 0.82                        |
| 1               | 29-30             | 0.68                        | 61                                 | 0.76                  | 0.17                    | 0.82                        |
| 1               | 30-31             | 0.67                        | 71                                 | 0.76                  | 0.16                    | 0.83                        |
| 1               | 31-32             | 0.63                        | 45                                 | 0.73                  | 0.17                    | 0.81                        |
| 1               | 32-33             | 0.63                        | 41                                 | 0.74                  | 0.15                    | 0.81                        |
| 1               | 33-34             | 0.65                        | 82                                 | 0.74                  | 0.17                    | 0.82                        |
| 1               | 34-35             | 0.64                        | 3                                  | 0.82                  | 0.00                    | 0.93                        |
| 1               | 35-36             | 0.64                        | 3                                  | 0.82                  | 0.00                    | 0.93                        |
| 1               | 36-37             | 0.64                        | 7                                  | 0.82                  | 0.00                    | 0.95                        |
| 1               | 37-38             | 0.65                        | 5                                  | 0.82                  | 0.00                    | 0.95                        |
| 1               | 38-39             | 0.65                        | 2                                  | 0.83                  | 0.00                    | 0.93                        |
| 1               | 39-40             | 0.66                        | 7                                  | 0.83                  | 0.00                    | 0.95                        |
| 1               | 40-41             | 0.65                        | 5                                  | 0.83                  | 0.00                    | 0.94                        |
| 1               | 41-42             | 0.64                        | 5                                  | 0.82                  | 0.00                    | 0.94                        |
| 1               | 42-43             | 0.66                        | 2                                  | 0.83                  | 0.00                    | 0.94                        |
| 1               | 43-44             | 0.66                        | 2                                  | 0.83                  | 0.00                    | 0.93                        |
| 1               | 44-45             | 0.66                        | 2                                  | 0.83                  | 0.00                    | 0.92                        |
| 1               | 45-46             | 0.67                        | 2                                  | 0.84                  | 0.00                    | 0.94                        |
| 1               | 46-47             | 0.67                        | 4                                  | 0.83                  | 0.00                    | 0.95                        |
| 1               | 47-48             | 0.67                        | 6                                  | 0.83                  | 0.00                    | 0.95                        |
| 1               | 48-49             | 0.67                        | 4                                  | 0.84                  | 0.00                    | 0.93                        |
| 1               | 49-50             | 0.69                        | 4                                  | 0.84                  | 0.00                    | 0.94                        |
| 1               | 50-51             | 0.69                        | 4                                  | 0.84                  | 0.00                    | 0.94                        |
| 1               | 51-52             | 0.68                        | 5                                  | 0.84                  | 0.00                    | 0.94                        |

*Continued on next page*



Table S2 – Continued from previous page

| <b>Fault No</b> | <b>Sample Bin</b> | <b>Fault Detection Rate</b> | <b>Optimal Feature Subset Size</b> | <b>Model Accuracy</b> | <b>False Alarm Rate</b> | <b>Area Under the Curve</b> |
|-----------------|-------------------|-----------------------------|------------------------------------|-----------------------|-------------------------|-----------------------------|
| 1               | 52-53             | 0.71                        | 4                                  | 0.85                  | 0.00                    | 0.93                        |
| 1               | 53-54             | 0.70                        | 9                                  | 0.85                  | 0.00                    | 0.95                        |
| 1               | 54-55             | 0.70                        | 5                                  | 0.85                  | 0.00                    | 0.94                        |
| 1               | 55-56             | 0.68                        | 9                                  | 0.84                  | 0.00                    | 0.94                        |
| 1               | 56-57             | 0.71                        | 5                                  | 0.85                  | 0.00                    | 0.93                        |
| 1               | 57-58             | 0.70                        | 7                                  | 0.85                  | 0.00                    | 0.94                        |
| 1               | 58-59             | 0.69                        | 9                                  | 0.84                  | 0.00                    | 0.94                        |
| 1               | 59-60             | 0.69                        | 10                                 | 0.84                  | 0.00                    | 0.94                        |
| 1               | 60-61             | 0.68                        | 8                                  | 0.84                  | 0.00                    | 0.93                        |
| 1               | 61-62             | 0.71                        | 3                                  | 0.85                  | 0.01                    | 0.92                        |
| 1               | 62-63             | 0.70                        | 9                                  | 0.85                  | 0.00                    | 0.93                        |
| 1               | 63-64             | 0.67                        | 25                                 | 0.83                  | 0.00                    | 0.94                        |
| 1               | 64-65             | 0.68                        | 8                                  | 0.83                  | 0.01                    | 0.91                        |
| 1               | 65-66             | 0.68                        | 22                                 | 0.84                  | 0.00                    | 0.94                        |
| 1               | 66-67             | 0.68                        | 16                                 | 0.84                  | 0.00                    | 0.94                        |
| 1               | 67-68             | 0.67                        | 9                                  | 0.83                  | 0.01                    | 0.91                        |
| 1               | 68-69             | 0.68                        | 30                                 | 0.84                  | 0.00                    | 0.94                        |
| 1               | 69-70             | 0.68                        | 6                                  | 0.84                  | 0.00                    | 0.90                        |
| 1               | 70-71             | 0.69                        | 17                                 | 0.84                  | 0.00                    | 0.93                        |
| 1               | 71-72             | 0.69                        | 22                                 | 0.85                  | 0.00                    | 0.94                        |
| 1               | 72-73             | 0.69                        | 40                                 | 0.84                  | 0.00                    | 0.94                        |
| 1               | 73-74             | 0.69                        | 29                                 | 0.84                  | 0.00                    | 0.93                        |
| 1               | 74-75             | 0.69                        | 27                                 | 0.84                  | 0.00                    | 0.93                        |
| 1               | 75-76             | 0.71                        | 39                                 | 0.85                  | 0.00                    | 0.94                        |
| 1               | 76-77             | 0.69                        | 38                                 | 0.84                  | 0.00                    | 0.93                        |
| 1               | 77-78             | 0.68                        | 35                                 | 0.84                  | 0.00                    | 0.93                        |

*Continued on next page*

Table S2 – Continued from previous page

| <b>Fault No</b> | <b>Sample Bin</b> | <b>Fault Detection Rate</b> | <b>Optimal Feature Subset Size</b> | <b>Model Accuracy</b> | <b>False Alarm Rate</b> | <b>Area Under the Curve</b> |
|-----------------|-------------------|-----------------------------|------------------------------------|-----------------------|-------------------------|-----------------------------|
| 1               | 78-79             | 0.69                        | 36                                 | 0.85                  | 0.00                    | 0.93                        |
| 1               | 79-80             | 0.70                        | 34                                 | 0.85                  | 0.00                    | 0.93                        |
| 1               | 80-81             | 0.70                        | 36                                 | 0.85                  | 0.00                    | 0.93                        |
| 1               | 81-82             | 0.70                        | 37                                 | 0.85                  | 0.00                    | 0.92                        |
| 1               | 82-83             | 0.70                        | 35                                 | 0.85                  | 0.00                    | 0.93                        |
| 1               | 83-84             | 0.70                        | 36                                 | 0.85                  | 0.00                    | 0.93                        |
| 1               | 84-85             | 0.68                        | 33                                 | 0.84                  | 0.00                    | 0.92                        |
| 1               | 85-86             | 0.68                        | 26                                 | 0.84                  | 0.00                    | 0.92                        |
| 1               | 86-87             | 0.68                        | 29                                 | 0.84                  | 0.00                    | 0.92                        |
| 1               | 87-88             | 0.68                        | 40                                 | 0.84                  | 0.00                    | 0.91                        |
| 1               | 88-89             | 0.69                        | 33                                 | 0.84                  | 0.01                    | 0.91                        |
| 1               | 89-90             | 0.69                        | 30                                 | 0.84                  | 0.00                    | 0.94                        |
| 1               | 90-91             | 0.75                        | 32                                 | 0.88                  | 0.00                    | 0.96                        |
| 1               | 91-92             | 0.67                        | 40                                 | 0.84                  | 0.00                    | 0.95                        |
| 1               | 92-93             | 0.68                        | 32                                 | 0.84                  | 0.00                    | 0.96                        |
| 1               | 93-94             | 0.67                        | 40                                 | 0.84                  | 0.00                    | 0.93                        |
| 1               | 94-95             | 0.67                        | 37                                 | 0.84                  | 0.00                    | 0.94                        |
| 1               | 95-96             | 0.69                        | 40                                 | 0.84                  | 0.00                    | 0.92                        |
| 1               | 96-97             | 0.68                        | 41                                 | 0.84                  | 0.00                    | 0.93                        |
| 1               | 97-98             | 0.68                        | 19                                 | 0.84                  | 0.00                    | 0.94                        |
| 1               | 98-99             | 0.72                        | 128                                | 0.81                  | 0.10                    | 0.88                        |
| 1               | 99-100            | 0.68                        | 25                                 | 0.84                  | 0.00                    | 0.94                        |
| 1               | 100-101           | 0.68                        | 32                                 | 0.84                  | 0.00                    | 0.94                        |
| 1               | 101-102           | 0.69                        | 32                                 | 0.84                  | 0.00                    | 0.94                        |
| 1               | 102-103           | 0.70                        | 18                                 | 0.85                  | 0.00                    | 0.95                        |
| 1               | 103-104           | 0.75                        | 87                                 | 0.83                  | 0.09                    | 0.89                        |

*Continued on next page*

Table S2 – Continued from previous page

| <b>Fault No</b> | <b>Sample Bin</b> | <b>Fault Detection Rate</b> | <b>Optimal Feature Subset Size</b> | <b>Model Accuracy</b> | <b>False Alarm Rate</b> | <b>Area Under the Curve</b> |
|-----------------|-------------------|-----------------------------|------------------------------------|-----------------------|-------------------------|-----------------------------|
| 1               | 104-105           | 0.67                        | 22                                 | 0.84                  | 0.00                    | 0.95                        |
| 1               | 105-106           | 0.69                        | 24                                 | 0.84                  | 0.00                    | 0.95                        |
| 1               | 106-107           | 0.67                        | 67                                 | 0.84                  | 0.00                    | 0.94                        |
| 1               | 107-108           | 0.69                        | 11                                 | 0.84                  | 0.00                    | 0.96                        |
| 1               | 108-109           | 0.68                        | 43                                 | 0.84                  | 0.00                    | 0.94                        |
| 1               | 109-110           | 0.70                        | 13                                 | 0.85                  | 0.00                    | 0.96                        |
| 1               | 110-111           | 0.73                        | 127                                | 0.83                  | 0.07                    | 0.90                        |
| 1               | 111-112           | 0.69                        | 13                                 | 0.85                  | 0.00                    | 0.97                        |
| 1               | 112-113           | 0.70                        | 14                                 | 0.85                  | 0.00                    | 0.97                        |
| 1               | 113-114           | 0.75                        | 107                                | 0.82                  | 0.12                    | 0.89                        |
| 1               | 114-115           | 0.76                        | 90                                 | 0.84                  | 0.09                    | 0.90                        |
| 1               | 115-116           | 0.75                        | 87                                 | 0.84                  | 0.07                    | 0.90                        |
| 1               | 116-117           | 0.70                        | 10                                 | 0.85                  | 0.00                    | 0.96                        |
| 1               | 117-118           | 0.69                        | 17                                 | 0.84                  | 0.00                    | 0.96                        |
| 1               | 118-119           | 0.68                        | 60                                 | 0.84                  | 0.00                    | 0.93                        |
| 1               | 119-120           | 0.70                        | 2                                  | 0.84                  | 0.02                    | 0.90                        |
| 2               | 2-3               | 0.77                        | 25                                 | 0.48                  | 0.81                    | 0.64                        |
| 2               | 3-4               | 0.60                        | 208                                | 0.49                  | 0.65                    | 0.47                        |
| 2               | 4-5               | 0.81                        | 9                                  | 0.51                  | 0.99                    | 1.00                        |
| 2               | 5-6               | 0.59                        | 11                                 | 0.63                  | 0.33                    | 0.72                        |
| 2               | 6-7               | 0.71                        | 27                                 | 0.69                  | 0.33                    | 0.75                        |
| 2               | 7-8               | 0.57                        | 117                                | 0.57                  | 0.44                    | 0.60                        |
| 2               | 8-9               | 0.82                        | 38                                 | 0.52                  | 0.79                    | 0.53                        |
| 2               | 9-10              | 0.71                        | 33                                 | 0.68                  | 0.35                    | 0.73                        |
| 2               | 10-11             | 0.68                        | 26                                 | 0.64                  | 0.39                    | 0.69                        |
| 2               | 11-12             | 0.67                        | 2                                  | 0.50                  | 0.67                    | 0.48                        |

*Continued on next page*

Table S2 – Continued from previous page

| <b>Fault No</b> | <b>Sample Bin</b> | <b>Fault Detection Rate</b> | <b>Optimal Feature Subset Size</b> | <b>Model Accuracy</b> | <b>False Alarm Rate</b> | <b>Area Under the Curve</b> |
|-----------------|-------------------|-----------------------------|------------------------------------|-----------------------|-------------------------|-----------------------------|
| 2               | 12-13             | 0.57                        | 128                                | 0.50                  | 0.56                    | 0.48                        |
| 2               | 13-14             | 0.97                        | 30                                 | 0.50                  | 0.97                    | 0.84                        |
| 2               | 14-15             | 0.69                        | 44                                 | 0.65                  | 0.38                    | 0.70                        |
| 2               | 15-16             | 0.66                        | 50                                 | 0.66                  | 0.34                    | 0.70                        |
| 2               | 16-17             | 0.71                        | 50                                 | 0.68                  | 0.36                    | 0.73                        |
| 2               | 17-18             | 0.69                        | 55                                 | 0.67                  | 0.34                    | 0.74                        |
| 2               | 18-19             | 0.72                        | 66                                 | 0.70                  | 0.31                    | 0.77                        |
| 2               | 19-20             | 0.67                        | 71                                 | 0.69                  | 0.28                    | 0.77                        |
| 2               | 20-21             | 0.74                        | 47                                 | 0.75                  | 0.24                    | 0.83                        |
| 2               | 21-22             | 0.72                        | 76                                 | 0.75                  | 0.23                    | 0.82                        |
| 2               | 22-23             | 0.72                        | 59                                 | 0.74                  | 0.25                    | 0.83                        |
| 2               | 23-24             | 0.72                        | 55                                 | 0.76                  | 0.21                    | 0.84                        |
| 2               | 24-25             | 0.67                        | 99                                 | 0.75                  | 0.17                    | 0.82                        |
| 2               | 25-26             | 0.67                        | 97                                 | 0.77                  | 0.14                    | 0.85                        |
| 2               | 26-27             | 0.66                        | 98                                 | 0.77                  | 0.12                    | 0.85                        |
| 2               | 27-28             | 0.66                        | 100                                | 0.76                  | 0.13                    | 0.85                        |
| 2               | 28-29             | 0.72                        | 50                                 | 0.77                  | 0.19                    | 0.85                        |
| 2               | 29-30             | 0.66                        | 76                                 | 0.77                  | 0.11                    | 0.86                        |
| 2               | 30-31             | 0.74                        | 84                                 | 0.77                  | 0.20                    | 0.86                        |
| 2               | 31-32             | 0.73                        | 54                                 | 0.78                  | 0.18                    | 0.87                        |
| 2               | 32-33             | 0.67                        | 76                                 | 0.79                  | 0.09                    | 0.87                        |
| 2               | 33-34             | 0.68                        | 51                                 | 0.79                  | 0.10                    | 0.87                        |
| 2               | 34-35             | 0.66                        | 62                                 | 0.78                  | 0.10                    | 0.86                        |
| 2               | 35-36             | 0.65                        | 41                                 | 0.79                  | 0.06                    | 0.87                        |
| 2               | 36-37             | 0.71                        | 47                                 | 0.75                  | 0.21                    | 0.84                        |
| 2               | 37-38             | 0.68                        | 60                                 | 0.79                  | 0.11                    | 0.86                        |

*Continued on next page*

Table S2 – Continued from previous page

| <b>Fault No</b> | <b>Sample Bin</b> | <b>Fault Detection Rate</b> | <b>Optimal Feature Subset Size</b> | <b>Model Accuracy</b> | <b>False Alarm Rate</b> | <b>Area Under the Curve</b> |
|-----------------|-------------------|-----------------------------|------------------------------------|-----------------------|-------------------------|-----------------------------|
| 2               | 38-39             | 0.73                        | 46                                 | 0.77                  | 0.18                    | 0.85                        |
| 2               | 39-40             | 0.69                        | 85                                 | 0.75                  | 0.18                    | 0.83                        |
| 2               | 40-41             | 0.64                        | 43                                 | 0.77                  | 0.09                    | 0.85                        |
| 2               | 41-42             | 0.64                        | 48                                 | 0.78                  | 0.09                    | 0.85                        |
| 2               | 42-43             | 0.69                        | 54                                 | 0.78                  | 0.14                    | 0.84                        |
| 2               | 43-44             | 0.66                        | 63                                 | 0.78                  | 0.09                    | 0.86                        |
| 2               | 44-45             | 0.66                        | 6                                  | 0.81                  | 0.03                    | 0.86                        |
| 2               | 45-46             | 0.66                        | 4                                  | 0.81                  | 0.03                    | 0.86                        |
| 2               | 46-47             | 0.73                        | 43                                 | 0.78                  | 0.17                    | 0.86                        |
| 2               | 47-48             | 0.71                        | 53                                 | 0.77                  | 0.17                    | 0.85                        |
| 2               | 48-49             | 0.70                        | 42                                 | 0.79                  | 0.12                    | 0.86                        |
| 2               | 49-50             | 0.70                        | 38                                 | 0.80                  | 0.10                    | 0.87                        |
| 2               | 50-51             | 0.68                        | 11                                 | 0.83                  | 0.01                    | 0.89                        |
| 2               | 51-52             | 0.67                        | 40                                 | 0.81                  | 0.06                    | 0.88                        |
| 2               | 52-53             | 0.66                        | 17                                 | 0.83                  | 0.01                    | 0.89                        |
| 2               | 53-54             | 0.69                        | 51                                 | 0.78                  | 0.12                    | 0.86                        |
| 2               | 54-55             | 0.70                        | 60                                 | 0.78                  | 0.14                    | 0.86                        |
| 2               | 55-56             | 0.66                        | 9                                  | 0.83                  | 0.00                    | 0.91                        |
| 2               | 56-57             | 0.73                        | 42                                 | 0.79                  | 0.15                    | 0.86                        |
| 2               | 57-58             | 0.71                        | 14                                 | 0.85                  | 0.00                    | 0.92                        |
| 2               | 58-59             | 0.76                        | 1                                  | 0.87                  | 0.01                    | 0.94                        |
| 2               | 59-60             | 0.70                        | 2                                  | 0.85                  | 0.00                    | 0.94                        |
| 2               | 60-61             | 0.69                        | 1                                  | 0.85                  | 0.00                    | 0.94                        |
| 2               | 61-62             | 0.71                        | 2                                  | 0.85                  | 0.00                    | 0.95                        |
| 2               | 62-63             | 0.70                        | 2                                  | 0.85                  | 0.00                    | 0.95                        |
| 2               | 63-64             | 0.74                        | 18                                 | 0.87                  | 0.00                    | 0.94                        |

*Continued on next page*

Table S2 – Continued from previous page

| <b>Fault No</b> | <b>Sample Bin</b> | <b>Fault Detection Rate</b> | <b>Optimal Feature Subset Size</b> | <b>Model Accuracy</b> | <b>False Alarm Rate</b> | <b>Area Under the Curve</b> |
|-----------------|-------------------|-----------------------------|------------------------------------|-----------------------|-------------------------|-----------------------------|
| 2               | 64-65             | 0.70                        | 2                                  | 0.85                  | 0.00                    | 0.96                        |
| 2               | 65-66             | 0.72                        | 2                                  | 0.86                  | 0.00                    | 0.96                        |
| 2               | 66-67             | 0.77                        | 13                                 | 0.88                  | 0.00                    | 0.95                        |
| 2               | 67-68             | 0.75                        | 18                                 | 0.87                  | 0.00                    | 0.96                        |
| 2               | 68-69             | 0.71                        | 2                                  | 0.86                  | 0.00                    | 0.97                        |
| 2               | 69-70             | 0.69                        | 2                                  | 0.85                  | 0.00                    | 0.97                        |
| 2               | 70-71             | 0.69                        | 2                                  | 0.85                  | 0.00                    | 0.97                        |
| 2               | 71-72             | 0.77                        | 17                                 | 0.88                  | 0.00                    | 0.95                        |
| 2               | 72-73             | 0.80                        | 1                                  | 0.90                  | 0.01                    | 0.97                        |
| 2               | 73-74             | 0.80                        | 2                                  | 0.90                  | 0.00                    | 0.98                        |
| 2               | 74-75             | 0.77                        | 21                                 | 0.89                  | 0.00                    | 0.96                        |
| 2               | 75-76             | 0.76                        | 21                                 | 0.88                  | 0.00                    | 0.97                        |
| 2               | 76-77             | 0.75                        | 22                                 | 0.87                  | 0.00                    | 0.97                        |
| 2               | 77-78             | 0.74                        | 22                                 | 0.87                  | 0.00                    | 0.96                        |
| 2               | 78-79             | 0.70                        | 2                                  | 0.85                  | 0.00                    | 0.98                        |
| 2               | 79-80             | 0.78                        | 17                                 | 0.89                  | 0.00                    | 0.96                        |
| 2               | 80-81             | 0.79                        | 12                                 | 0.89                  | 0.00                    | 0.96                        |
| 2               | 81-82             | 0.75                        | 20                                 | 0.87                  | 0.00                    | 0.97                        |
| 2               | 82-83             | 0.70                        | 2                                  | 0.85                  | 0.00                    | 0.98                        |
| 2               | 83-84             | 0.78                        | 20                                 | 0.89                  | 0.00                    | 0.97                        |
| 2               | 84-85             | 0.71                        | 2                                  | 0.85                  | 0.00                    | 0.98                        |
| 2               | 85-86             | 0.82                        | 22                                 | 0.91                  | 0.00                    | 0.97                        |
| 2               | 86-87             | 0.79                        | 22                                 | 0.89                  | 0.00                    | 0.97                        |
| 2               | 87-88             | 0.75                        | 16                                 | 0.87                  | 0.00                    | 0.96                        |
| 2               | 88-89             | 0.78                        | 16                                 | 0.89                  | 0.00                    | 0.96                        |
| 2               | 89-90             | 0.74                        | 19                                 | 0.87                  | 0.00                    | 0.96                        |

*Continued on next page*

Table S2 – Continued from previous page

| <b>Fault No</b> | <b>Sample Bin</b> | <b>Fault Detection Rate</b> | <b>Optimal Feature Subset Size</b> | <b>Model Accuracy</b> | <b>False Alarm Rate</b> | <b>Area Under the Curve</b> |
|-----------------|-------------------|-----------------------------|------------------------------------|-----------------------|-------------------------|-----------------------------|
| 2               | 90-91             | 0.77                        | 23                                 | 0.88                  | 0.00                    | 0.97                        |
| 2               | 91-92             | 0.69                        | 1                                  | 0.85                  | 0.00                    | 0.98                        |
| 2               | 92-93             | 0.77                        | 18                                 | 0.89                  | 0.00                    | 0.96                        |
| 2               | 93-94             | 0.78                        | 20                                 | 0.89                  | 0.00                    | 0.97                        |
| 2               | 94-95             | 0.70                        | 2                                  | 0.85                  | 0.00                    | 0.98                        |
| 2               | 95-96             | 0.73                        | 13                                 | 0.87                  | 0.00                    | 0.96                        |
| 2               | 96-97             | 0.76                        | 21                                 | 0.88                  | 0.00                    | 0.97                        |
| 2               | 97-98             | 0.78                        | 16                                 | 0.89                  | 0.00                    | 0.97                        |
| 2               | 98-99             | 0.79                        | 20                                 | 0.89                  | 0.00                    | 0.98                        |
| 2               | 99-100            | 0.74                        | 22                                 | 0.87                  | 0.00                    | 0.97                        |
| 2               | 100-101           | 0.69                        | 2                                  | 0.85                  | 0.00                    | 0.99                        |
| 2               | 101-102           | 0.69                        | 2                                  | 0.85                  | 0.00                    | 0.98                        |
| 2               | 102-103           | 0.80                        | 1                                  | 0.90                  | 0.00                    | 0.97                        |
| 2               | 103-104           | 0.70                        | 2                                  | 0.85                  | 0.00                    | 0.98                        |
| 2               | 104-105           | 0.77                        | 12                                 | 0.88                  | 0.01                    | 0.96                        |
| 2               | 105-106           | 0.79                        | 18                                 | 0.90                  | 0.00                    | 0.97                        |
| 2               | 106-107           | 0.74                        | 22                                 | 0.87                  | 0.00                    | 0.97                        |
| 2               | 107-108           | 0.80                        | 2                                  | 0.90                  | 0.00                    | 0.98                        |
| 2               | 108-109           | 0.81                        | 2                                  | 0.90                  | 0.00                    | 0.99                        |
| 2               | 109-110           | 0.81                        | 16                                 | 0.90                  | 0.00                    | 0.97                        |
| 2               | 110-111           | 0.75                        | 22                                 | 0.87                  | 0.00                    | 0.97                        |
| 2               | 111-112           | 0.69                        | 2                                  | 0.85                  | 0.00                    | 0.99                        |
| 2               | 112-113           | 0.69                        | 2                                  | 0.84                  | 0.00                    | 0.99                        |
| 2               | 113-114           | 0.79                        | 22                                 | 0.90                  | 0.00                    | 0.97                        |
| 2               | 114-115           | 0.74                        | 22                                 | 0.87                  | 0.00                    | 0.97                        |
| 2               | 115-116           | 0.75                        | 21                                 | 0.87                  | 0.00                    | 0.97                        |

*Continued on next page*

Table S2 – Continued from previous page

| <b>Fault No</b> | <b>Sample Bin</b> | <b>Fault Detection Rate</b> | <b>Optimal Feature Subset Size</b> | <b>Model Accuracy</b> | <b>False Alarm Rate</b> | <b>Area Under the Curve</b> |
|-----------------|-------------------|-----------------------------|------------------------------------|-----------------------|-------------------------|-----------------------------|
| 2               | 116-117           | 0.74                        | 22                                 | 0.87                  | 0.00                    | 0.97                        |
| 2               | 117-118           | 0.69                        | 2                                  | 0.85                  | 0.00                    | 0.98                        |
| 2               | 118-119           | 0.78                        | 13                                 | 0.89                  | 0.00                    | 0.96                        |
| 2               | 119-120           | 0.69                        | 1                                  | 0.85                  | 0.00                    | 0.98                        |
| 3               | 2-3               | 1.00                        | 2                                  | 1.00                  | 0.00                    | 1.00                        |
| 3               | 3-4               | 0.97                        | 34                                 | 0.98                  | 0.00                    | 1.00                        |
| 3               | 4-5               | 1.00                        | 4                                  | 1.00                  | 0.00                    | 1.00                        |
| 3               | 5-6               | 1.00                        | 36                                 | 1.00                  | 0.00                    | 1.00                        |
| 3               | 6-7               | 0.98                        | 45                                 | 0.99                  | 0.00                    | 1.00                        |
| 3               | 7-8               | 0.99                        | 41                                 | 1.00                  | 0.00                    | 1.00                        |
| 3               | 8-9               | 0.98                        | 7                                  | 0.99                  | 0.00                    | 1.00                        |
| 3               | 9-10              | 0.94                        | 10                                 | 0.97                  | 0.00                    | 1.00                        |
| 3               | 10-11             | 0.94                        | 51                                 | 0.97                  | 0.01                    | 1.00                        |
| 3               | 11-12             | 0.96                        | 58                                 | 0.97                  | 0.01                    | 1.00                        |
| 3               | 12-13             | 0.94                        | 29                                 | 0.97                  | 0.00                    | 1.00                        |
| 3               | 13-14             | 0.94                        | 43                                 | 0.97                  | 0.00                    | 1.00                        |
| 3               | 14-15             | 0.96                        | 37                                 | 0.98                  | 0.01                    | 1.00                        |
| 3               | 15-16             | 0.94                        | 10                                 | 0.97                  | 0.00                    | 1.00                        |
| 3               | 16-17             | 0.93                        | 64                                 | 0.96                  | 0.01                    | 0.99                        |
| 3               | 17-18             | 0.93                        | 38                                 | 0.97                  | 0.00                    | 0.99                        |
| 3               | 18-19             | 0.93                        | 8                                  | 0.97                  | 0.00                    | 0.99                        |
| 3               | 19-20             | 0.99                        | 8                                  | 0.99                  | 0.00                    | 1.00                        |
| 3               | 20-21             | 0.98                        | 4                                  | 0.99                  | 0.00                    | 1.00                        |
| 3               | 21-22             | 0.98                        | 7                                  | 0.99                  | 0.00                    | 1.00                        |
| 3               | 22-23             | 0.98                        | 9                                  | 0.99                  | 0.00                    | 1.00                        |
| 3               | 23-24             | 0.95                        | 26                                 | 0.98                  | 0.00                    | 1.00                        |

*Continued on next page*



Table S2 – Continued from previous page

| <b>Fault No</b> | <b>Sample Bin</b> | <b>Fault Detection Rate</b> | <b>Optimal Feature Subset Size</b> | <b>Model Accuracy</b> | <b>False Alarm Rate</b> | <b>Area Under the Curve</b> |
|-----------------|-------------------|-----------------------------|------------------------------------|-----------------------|-------------------------|-----------------------------|
| 3               | 24-25             | 0.95                        | 9                                  | 0.97                  | 0.00                    | 1.00                        |
| 3               | 25-26             | 0.95                        | 28                                 | 0.97                  | 0.00                    | 1.00                        |
| 3               | 26-27             | 0.97                        | 3                                  | 0.98                  | 0.00                    | 1.00                        |
| 3               | 27-28             | 0.98                        | 12                                 | 0.99                  | 0.00                    | 1.00                        |
| 3               | 28-29             | 0.99                        | 13                                 | 0.99                  | 0.01                    | 1.00                        |
| 3               | 29-30             | 0.98                        | 15                                 | 0.99                  | 0.00                    | 1.00                        |
| 3               | 30-31             | 0.99                        | 1                                  | 0.99                  | 0.01                    | 0.99                        |
| 3               | 31-32             | 1.00                        | 11                                 | 1.00                  | 0.01                    | 1.00                        |
| 3               | 32-33             | 1.00                        | 2                                  | 1.00                  | 0.01                    | 1.00                        |
| 3               | 33-34             | 0.99                        | 12                                 | 1.00                  | 0.00                    | 1.00                        |
| 3               | 34-35             | 1.00                        | 4                                  | 1.00                  | 0.00                    | 1.00                        |
| 3               | 35-36             | 0.99                        | 19                                 | 0.99                  | 0.00                    | 1.00                        |
| 3               | 36-37             | 0.99                        | 18                                 | 0.99                  | 0.00                    | 1.00                        |
| 3               | 37-38             | 0.98                        | 17                                 | 0.99                  | 0.00                    | 1.00                        |
| 3               | 38-39             | 0.98                        | 27                                 | 0.99                  | 0.00                    | 1.00                        |
| 3               | 39-40             | 0.99                        | 2                                  | 0.99                  | 0.00                    | 1.00                        |
| 3               | 40-41             | 0.99                        | 1                                  | 1.00                  | 0.00                    | 1.00                        |
| 3               | 41-42             | 0.99                        | 2                                  | 0.99                  | 0.00                    | 1.00                        |
| 3               | 42-43             | 0.99                        | 2                                  | 0.99                  | 0.00                    | 1.00                        |
| 3               | 43-44             | 0.99                        | 27                                 | 1.00                  | 0.00                    | 1.00                        |
| 3               | 44-45             | 0.99                        | 2                                  | 0.99                  | 0.00                    | 1.00                        |
| 3               | 45-46             | 0.99                        | 14                                 | 0.99                  | 0.00                    | 1.00                        |
| 3               | 46-47             | 0.99                        | 3                                  | 1.00                  | 0.00                    | 1.00                        |
| 3               | 47-48             | 0.99                        | 16                                 | 0.99                  | 0.00                    | 1.00                        |
| 3               | 48-49             | 0.99                        | 2                                  | 0.99                  | 0.00                    | 1.00                        |
| 3               | 49-50             | 0.98                        | 2                                  | 0.99                  | 0.00                    | 1.00                        |

*Continued on next page*

Table S2 – *Continued from previous page*

| <b>Fault No</b> | <b>Sample Bin</b> | <b>Fault Detection Rate</b> | <b>Optimal Feature Subset Size</b> | <b>Model Accuracy</b> | <b>False Alarm Rate</b> | <b>Area Under the Curve</b> |
|-----------------|-------------------|-----------------------------|------------------------------------|-----------------------|-------------------------|-----------------------------|
| 3               | 50-51             | 0.98                        | 5                                  | 0.99                  | 0.00                    | 1.00                        |
| 3               | 51-52             | 0.99                        | 2                                  | 0.99                  | 0.00                    | 1.00                        |
| 3               | 52-53             | 0.98                        | 2                                  | 0.99                  | 0.00                    | 1.00                        |
| 3               | 53-54             | 0.98                        | 2                                  | 0.99                  | 0.00                    | 1.00                        |
| 3               | 54-55             | 0.97                        | 2                                  | 0.98                  | 0.00                    | 1.00                        |
| 3               | 55-56             | 0.98                        | 18                                 | 0.99                  | 0.00                    | 1.00                        |
| 3               | 56-57             | 0.98                        | 2                                  | 0.99                  | 0.00                    | 1.00                        |
| 3               | 57-58             | 0.99                        | 2                                  | 0.99                  | 0.00                    | 1.00                        |
| 3               | 58-59             | 0.99                        | 22                                 | 0.99                  | 0.00                    | 1.00                        |
| 3               | 59-60             | 0.98                        | 2                                  | 0.99                  | 0.00                    | 1.00                        |
| 3               | 60-61             | 0.98                        | 1                                  | 0.99                  | 0.00                    | 1.00                        |
| 3               | 61-62             | 0.99                        | 2                                  | 0.99                  | 0.00                    | 1.00                        |
| 3               | 62-63             | 0.98                        | 2                                  | 0.99                  | 0.00                    | 1.00                        |
| 3               | 63-64             | 0.98                        | 2                                  | 0.99                  | 0.00                    | 1.00                        |
| 3               | 64-65             | 0.98                        | 2                                  | 0.99                  | 0.00                    | 1.00                        |
| 3               | 65-66             | 0.98                        | 1                                  | 0.99                  | 0.00                    | 1.00                        |
| 3               | 66-67             | 0.98                        | 2                                  | 0.99                  | 0.00                    | 1.00                        |
| 3               | 67-68             | 0.98                        | 2                                  | 0.99                  | 0.00                    | 1.00                        |
| 3               | 68-69             | 0.98                        | 1                                  | 0.99                  | 0.00                    | 1.00                        |
| 3               | 69-70             | 0.99                        | 2                                  | 0.99                  | 0.00                    | 1.00                        |
| 3               | 70-71             | 0.98                        | 2                                  | 0.99                  | 0.00                    | 1.00                        |
| 3               | 71-72             | 0.98                        | 19                                 | 0.99                  | 0.00                    | 1.00                        |
| 3               | 72-73             | 0.99                        | 1                                  | 0.99                  | 0.00                    | 1.00                        |
| 3               | 73-74             | 0.99                        | 2                                  | 0.99                  | 0.00                    | 1.00                        |
| 3               | 74-75             | 0.99                        | 15                                 | 0.99                  | 0.00                    | 1.00                        |
| 3               | 75-76             | 0.99                        | 2                                  | 1.00                  | 0.00                    | 1.00                        |

*Continued on next page*

Table S2 – Continued from previous page

| <b>Fault No</b> | <b>Sample Bin</b> | <b>Fault Detection Rate</b> | <b>Optimal Feature Subset Size</b> | <b>Model Accuracy</b> | <b>False Alarm Rate</b> | <b>Area Under the Curve</b> |
|-----------------|-------------------|-----------------------------|------------------------------------|-----------------------|-------------------------|-----------------------------|
| 3               | 76-77             | 0.98                        | 2                                  | 0.99                  | 0.00                    | 1.00                        |
| 3               | 77-78             | 0.99                        | 21                                 | 0.99                  | 0.00                    | 1.00                        |
| 3               | 78-79             | 0.98                        | 17                                 | 0.99                  | 0.00                    | 1.00                        |
| 3               | 79-80             | 0.98                        | 2                                  | 0.99                  | 0.00                    | 1.00                        |
| 3               | 80-81             | 0.98                        | 33                                 | 0.99                  | 0.00                    | 1.00                        |
| 3               | 81-82             | 0.99                        | 18                                 | 0.99                  | 0.00                    | 1.00                        |
| 3               | 82-83             | 0.99                        | 2                                  | 0.99                  | 0.00                    | 1.00                        |
| 3               | 83-84             | 0.98                        | 2                                  | 0.99                  | 0.00                    | 1.00                        |
| 3               | 84-85             | 0.99                        | 19                                 | 0.99                  | 0.00                    | 1.00                        |
| 3               | 85-86             | 0.99                        | 2                                  | 0.99                  | 0.00                    | 1.00                        |
| 3               | 86-87             | 0.98                        | 2                                  | 0.99                  | 0.00                    | 1.00                        |
| 3               | 87-88             | 0.98                        | 2                                  | 0.99                  | 0.00                    | 1.00                        |
| 3               | 88-89             | 0.98                        | 2                                  | 0.99                  | 0.00                    | 1.00                        |
| 3               | 89-90             | 0.98                        | 2                                  | 0.99                  | 0.00                    | 1.00                        |
| 3               | 90-91             | 0.98                        | 20                                 | 0.99                  | 0.00                    | 1.00                        |
| 3               | 91-92             | 0.98                        | 2                                  | 0.99                  | 0.00                    | 1.00                        |
| 3               | 92-93             | 0.98                        | 2                                  | 0.99                  | 0.00                    | 1.00                        |
| 3               | 93-94             | 0.97                        | 2                                  | 0.99                  | 0.00                    | 1.00                        |
| 3               | 94-95             | 0.99                        | 2                                  | 0.99                  | 0.00                    | 1.00                        |
| 3               | 95-96             | 0.97                        | 2                                  | 0.99                  | 0.00                    | 1.00                        |
| 3               | 96-97             | 0.97                        | 2                                  | 0.99                  | 0.00                    | 1.00                        |
| 3               | 97-98             | 0.99                        | 17                                 | 0.99                  | 0.00                    | 1.00                        |
| 3               | 98-99             | 0.99                        | 2                                  | 0.99                  | 0.00                    | 1.00                        |
| 3               | 99-100            | 0.99                        | 2                                  | 0.99                  | 0.00                    | 1.00                        |
| 3               | 100-101           | 0.99                        | 2                                  | 0.99                  | 0.00                    | 1.00                        |
| 3               | 101-102           | 0.99                        | 2                                  | 0.99                  | 0.00                    | 1.00                        |

*Continued on next page*

Table S2 – Continued from previous page

| <b>Fault No</b> | <b>Sample Bin</b> | <b>Fault Detection Rate</b> | <b>Optimal Feature Subset Size</b> | <b>Model Accuracy</b> | <b>False Alarm Rate</b> | <b>Area Under the Curve</b> |
|-----------------|-------------------|-----------------------------|------------------------------------|-----------------------|-------------------------|-----------------------------|
| 3               | 102-103           | 0.98                        | 2                                  | 0.99                  | 0.00                    | 1.00                        |
| 3               | 103-104           | 0.98                        | 2                                  | 0.99                  | 0.00                    | 1.00                        |
| 3               | 104-105           | 0.98                        | 2                                  | 0.99                  | 0.00                    | 1.00                        |
| 3               | 105-106           | 0.99                        | 25                                 | 0.99                  | 0.00                    | 1.00                        |
| 3               | 106-107           | 0.98                        | 2                                  | 0.99                  | 0.00                    | 1.00                        |
| 3               | 107-108           | 0.99                        | 2                                  | 0.99                  | 0.00                    | 1.00                        |
| 3               | 108-109           | 0.98                        | 2                                  | 0.99                  | 0.00                    | 1.00                        |
| 3               | 109-110           | 0.98                        | 2                                  | 0.99                  | 0.00                    | 1.00                        |
| 3               | 110-111           | 0.99                        | 2                                  | 0.99                  | 0.00                    | 1.00                        |
| 3               | 111-112           | 0.98                        | 2                                  | 0.99                  | 0.00                    | 1.00                        |
| 3               | 112-113           | 0.98                        | 2                                  | 0.99                  | 0.00                    | 1.00                        |
| 3               | 113-114           | 0.99                        | 2                                  | 0.99                  | 0.00                    | 1.00                        |
| 3               | 114-115           | 0.99                        | 2                                  | 0.99                  | 0.00                    | 1.00                        |
| 3               | 115-116           | 0.98                        | 2                                  | 0.99                  | 0.00                    | 1.00                        |
| 3               | 116-117           | 0.98                        | 2                                  | 0.99                  | 0.00                    | 1.00                        |
| 3               | 117-118           | 0.97                        | 2                                  | 0.99                  | 0.00                    | 1.00                        |
| 3               | 118-119           | 0.98                        | 2                                  | 0.99                  | 0.00                    | 1.00                        |
| 3               | 119-120           | 0.97                        | 2                                  | 0.99                  | 0.00                    | 1.00                        |
| 4               | 2-3               | 0.82                        | 48                                 | 0.83                  | 0.17                    | 0.91                        |
| 4               | 3-4               | 0.85                        | 74                                 | 0.83                  | 0.19                    | 0.90                        |
| 4               | 4-5               | 0.83                        | 26                                 | 0.83                  | 0.16                    | 0.92                        |
| 4               | 5-6               | 0.82                        | 38                                 | 0.81                  | 0.20                    | 0.90                        |
| 4               | 6-7               | 0.85                        | 65                                 | 0.86                  | 0.13                    | 0.93                        |
| 4               | 7-8               | 0.85                        | 45                                 | 0.87                  | 0.12                    | 0.94                        |
| 4               | 8-9               | 0.89                        | 67                                 | 0.91                  | 0.07                    | 0.97                        |
| 4               | 9-10              | 0.89                        | 66                                 | 0.90                  | 0.10                    | 0.96                        |

*Continued on next page*

Table S2 – Continued from previous page

| <b>Fault No</b> | <b>Sample Bin</b> | <b>Fault Detection Rate</b> | <b>Optimal Feature Subset Size</b> | <b>Model Accuracy</b> | <b>False Alarm Rate</b> | <b>Area Under the Curve</b> |
|-----------------|-------------------|-----------------------------|------------------------------------|-----------------------|-------------------------|-----------------------------|
| 4               | 10-11             | 0.89                        | 71                                 | 0.92                  | 0.05                    | 0.98                        |
| 4               | 11-12             | 0.94                        | 75                                 | 0.95                  | 0.04                    | 0.99                        |
| 4               | 12-13             | 0.90                        | 94                                 | 0.92                  | 0.05                    | 0.97                        |
| 4               | 13-14             | 0.94                        | 71                                 | 0.96                  | 0.02                    | 0.99                        |
| 4               | 14-15             | 0.88                        | 52                                 | 0.93                  | 0.01                    | 0.98                        |
| 4               | 15-16             | 0.92                        | 103                                | 0.94                  | 0.03                    | 0.99                        |
| 4               | 16-17             | 0.92                        | 110                                | 0.96                  | 0.01                    | 0.99                        |
| 4               | 17-18             | 0.96                        | 70                                 | 0.98                  | 0.00                    | 1.00                        |
| 4               | 18-19             | 0.92                        | 76                                 | 0.96                  | 0.00                    | 1.00                        |
| 4               | 19-20             | 0.95                        | 103                                | 0.97                  | 0.01                    | 0.99                        |
| 4               | 20-21             | 0.95                        | 45                                 | 0.97                  | 0.00                    | 0.99                        |
| 4               | 21-22             | 0.95                        | 66                                 | 0.97                  | 0.01                    | 1.00                        |
| 4               | 22-23             | 0.95                        | 52                                 | 0.97                  | 0.01                    | 1.00                        |
| 4               | 23-24             | 0.91                        | 67                                 | 0.96                  | 0.00                    | 0.99                        |
| 4               | 24-25             | 0.95                        | 55                                 | 0.97                  | 0.01                    | 1.00                        |
| 4               | 25-26             | 0.96                        | 53                                 | 0.98                  | 0.00                    | 1.00                        |
| 4               | 26-27             | 0.95                        | 47                                 | 0.97                  | 0.00                    | 1.00                        |
| 4               | 27-28             | 0.91                        | 38                                 | 0.95                  | 0.00                    | 0.99                        |
| 4               | 28-29             | 0.95                        | 58                                 | 0.97                  | 0.00                    | 0.99                        |
| 4               | 29-30             | 0.93                        | 38                                 | 0.97                  | 0.00                    | 1.00                        |
| 4               | 30-31             | 0.97                        | 61                                 | 0.98                  | 0.01                    | 1.00                        |
| 4               | 31-32             | 0.96                        | 56                                 | 0.98                  | 0.00                    | 1.00                        |
| 4               | 32-33             | 0.97                        | 33                                 | 0.98                  | 0.00                    | 1.00                        |
| 4               | 33-34             | 0.97                        | 31                                 | 0.98                  | 0.00                    | 1.00                        |
| 4               | 34-35             | 0.94                        | 47                                 | 0.97                  | 0.00                    | 0.99                        |
| 4               | 35-36             | 0.97                        | 20                                 | 0.98                  | 0.00                    | 1.00                        |

*Continued on next page*

Table S2 – *Continued from previous page*

| <b>Fault No</b> | <b>Sample Bin</b> | <b>Fault Detection Rate</b> | <b>Optimal Feature Subset Size</b> | <b>Model Accuracy</b> | <b>False Alarm Rate</b> | <b>Area Under the Curve</b> |
|-----------------|-------------------|-----------------------------|------------------------------------|-----------------------|-------------------------|-----------------------------|
| 4               | 36-37             | 0.96                        | 21                                 | 0.98                  | 0.00                    | 1.00                        |
| 4               | 37-38             | 0.96                        | 32                                 | 0.98                  | 0.00                    | 1.00                        |
| 4               | 38-39             | 0.91                        | 56                                 | 0.96                  | 0.00                    | 1.00                        |
| 4               | 39-40             | 0.95                        | 73                                 | 0.97                  | 0.00                    | 1.00                        |
| 4               | 40-41             | 0.95                        | 28                                 | 0.98                  | 0.00                    | 1.00                        |
| 4               | 41-42             | 0.96                        | 29                                 | 0.98                  | 0.00                    | 1.00                        |
| 4               | 42-43             | 0.97                        | 47                                 | 0.99                  | 0.00                    | 1.00                        |
| 4               | 43-44             | 0.98                        | 25                                 | 0.99                  | 0.00                    | 1.00                        |
| 4               | 44-45             | 0.97                        | 26                                 | 0.98                  | 0.00                    | 1.00                        |
| 4               | 45-46             | 0.95                        | 37                                 | 0.98                  | 0.00                    | 1.00                        |
| 4               | 46-47             | 0.92                        | 41                                 | 0.96                  | 0.00                    | 1.00                        |
| 4               | 47-48             | 0.96                        | 30                                 | 0.98                  | 0.00                    | 1.00                        |
| 4               | 48-49             | 0.93                        | 42                                 | 0.96                  | 0.00                    | 1.00                        |
| 4               | 49-50             | 0.96                        | 25                                 | 0.98                  | 0.00                    | 1.00                        |
| 4               | 50-51             | 0.97                        | 25                                 | 0.99                  | 0.00                    | 1.00                        |
| 4               | 51-52             | 0.95                        | 44                                 | 0.97                  | 0.00                    | 1.00                        |
| 4               | 52-53             | 0.95                        | 34                                 | 0.97                  | 0.00                    | 1.00                        |
| 4               | 53-54             | 0.97                        | 32                                 | 0.99                  | 0.00                    | 1.00                        |
| 4               | 54-55             | 0.97                        | 25                                 | 0.98                  | 0.00                    | 1.00                        |
| 4               | 55-56             | 0.96                        | 24                                 | 0.98                  | 0.00                    | 1.00                        |
| 4               | 56-57             | 0.96                        | 27                                 | 0.98                  | 0.00                    | 1.00                        |
| 4               | 57-58             | 0.92                        | 24                                 | 0.96                  | 0.00                    | 1.00                        |
| 4               | 58-59             | 0.92                        | 27                                 | 0.96                  | 0.00                    | 1.00                        |
| 4               | 59-60             | 0.94                        | 31                                 | 0.97                  | 0.00                    | 1.00                        |
| 4               | 60-61             | 0.97                        | 29                                 | 0.99                  | 0.00                    | 1.00                        |
| 4               | 61-62             | 0.93                        | 25                                 | 0.97                  | 0.00                    | 1.00                        |

*Continued on next page*

Table S2 – Continued from previous page

| <b>Fault No</b> | <b>Sample Bin</b> | <b>Fault Detection Rate</b> | <b>Optimal Feature Subset Size</b> | <b>Model Accuracy</b> | <b>False Alarm Rate</b> | <b>Area Under the Curve</b> |
|-----------------|-------------------|-----------------------------|------------------------------------|-----------------------|-------------------------|-----------------------------|
| 4               | 62-63             | 0.97                        | 25                                 | 0.98                  | 0.00                    | 1.00                        |
| 4               | 63-64             | 0.97                        | 24                                 | 0.98                  | 0.00                    | 1.00                        |
| 4               | 64-65             | 0.96                        | 24                                 | 0.98                  | 0.00                    | 1.00                        |
| 4               | 65-66             | 0.97                        | 24                                 | 0.98                  | 0.00                    | 1.00                        |
| 4               | 66-67             | 0.96                        | 25                                 | 0.98                  | 0.00                    | 1.00                        |
| 4               | 67-68             | 0.98                        | 25                                 | 0.99                  | 0.00                    | 1.00                        |
| 4               | 68-69             | 0.98                        | 26                                 | 0.99                  | 0.00                    | 1.00                        |
| 4               | 69-70             | 0.98                        | 27                                 | 0.99                  | 0.00                    | 1.00                        |
| 4               | 70-71             | 0.97                        | 24                                 | 0.99                  | 0.00                    | 1.00                        |
| 4               | 71-72             | 0.97                        | 25                                 | 0.99                  | 0.00                    | 1.00                        |
| 4               | 72-73             | 0.97                        | 25                                 | 0.99                  | 0.00                    | 1.00                        |
| 4               | 73-74             | 0.99                        | 25                                 | 1.00                  | 0.00                    | 1.00                        |
| 4               | 74-75             | 0.98                        | 25                                 | 0.99                  | 0.00                    | 1.00                        |
| 4               | 75-76             | 0.97                        | 26                                 | 0.98                  | 0.00                    | 1.00                        |
| 4               | 76-77             | 0.96                        | 26                                 | 0.98                  | 0.00                    | 1.00                        |
| 4               | 77-78             | 0.92                        | 25                                 | 0.96                  | 0.00                    | 1.00                        |
| 4               | 78-79             | 0.98                        | 27                                 | 0.99                  | 0.00                    | 1.00                        |
| 4               | 79-80             | 0.94                        | 59                                 | 0.97                  | 0.00                    | 1.00                        |
| 4               | 80-81             | 0.93                        | 29                                 | 0.96                  | 0.00                    | 1.00                        |
| 4               | 81-82             | 0.92                        | 53                                 | 0.96                  | 0.00                    | 1.00                        |
| 4               | 82-83             | 0.94                        | 90                                 | 0.96                  | 0.02                    | 0.99                        |
| 4               | 83-84             | 0.95                        | 48                                 | 0.97                  | 0.00                    | 1.00                        |
| 4               | 84-85             | 0.96                        | 25                                 | 0.98                  | 0.00                    | 1.00                        |
| 4               | 85-86             | 0.96                        | 24                                 | 0.98                  | 0.00                    | 1.00                        |
| 4               | 86-87             | 0.95                        | 42                                 | 0.98                  | 0.00                    | 1.00                        |
| 4               | 87-88             | 0.97                        | 25                                 | 0.99                  | 0.00                    | 1.00                        |

*Continued on next page*

Table S2 – *Continued from previous page*

| <b>Fault No</b> | <b>Sample Bin</b> | <b>Fault Detection Rate</b> | <b>Optimal Feature Subset Size</b> | <b>Model Accuracy</b> | <b>False Alarm Rate</b> | <b>Area Under the Curve</b> |
|-----------------|-------------------|-----------------------------|------------------------------------|-----------------------|-------------------------|-----------------------------|
| 4               | 88-89             | 0.98                        | 25                                 | 0.99                  | 0.00                    | 1.00                        |
| 4               | 89-90             | 0.98                        | 24                                 | 0.99                  | 0.00                    | 1.00                        |
| 4               | 90-91             | 0.97                        | 23                                 | 0.99                  | 0.00                    | 1.00                        |
| 4               | 91-92             | 0.92                        | 41                                 | 0.96                  | 0.00                    | 1.00                        |
| 4               | 92-93             | 0.95                        | 41                                 | 0.97                  | 0.00                    | 1.00                        |
| 4               | 93-94             | 0.97                        | 23                                 | 0.98                  | 0.00                    | 1.00                        |
| 4               | 94-95             | 0.96                        | 31                                 | 0.98                  | 0.00                    | 1.00                        |
| 4               | 95-96             | 0.97                        | 24                                 | 0.99                  | 0.00                    | 1.00                        |
| 4               | 96-97             | 0.92                        | 76                                 | 0.96                  | 0.00                    | 1.00                        |
| 4               | 97-98             | 0.97                        | 30                                 | 0.98                  | 0.00                    | 1.00                        |
| 4               | 98-99             | 0.97                        | 26                                 | 0.99                  | 0.00                    | 1.00                        |
| 4               | 99-100            | 0.98                        | 29                                 | 0.99                  | 0.00                    | 1.00                        |
| 4               | 100-101           | 0.98                        | 25                                 | 0.99                  | 0.00                    | 1.00                        |
| 4               | 101-102           | 0.97                        | 25                                 | 0.99                  | 0.00                    | 1.00                        |
| 4               | 102-103           | 0.97                        | 25                                 | 0.99                  | 0.00                    | 1.00                        |
| 4               | 103-104           | 0.98                        | 24                                 | 0.99                  | 0.00                    | 1.00                        |
| 4               | 104-105           | 0.97                        | 24                                 | 0.98                  | 0.00                    | 1.00                        |
| 4               | 105-106           | 0.97                        | 24                                 | 0.99                  | 0.00                    | 1.00                        |
| 4               | 106-107           | 0.97                        | 24                                 | 0.99                  | 0.00                    | 1.00                        |
| 4               | 107-108           | 0.97                        | 49                                 | 0.98                  | 0.00                    | 1.00                        |
| 4               | 108-109           | 0.96                        | 34                                 | 0.98                  | 0.00                    | 1.00                        |
| 4               | 109-110           | 0.98                        | 25                                 | 0.99                  | 0.00                    | 1.00                        |
| 4               | 110-111           | 0.98                        | 28                                 | 0.99                  | 0.00                    | 1.00                        |
| 4               | 111-112           | 0.96                        | 29                                 | 0.98                  | 0.00                    | 1.00                        |
| 4               | 112-113           | 0.93                        | 65                                 | 0.97                  | 0.00                    | 1.00                        |
| 4               | 113-114           | 0.93                        | 67                                 | 0.96                  | 0.00                    | 1.00                        |

*Continued on next page*



Table S2 – Continued from previous page

| <b>Fault No</b> | <b>Sample Bin</b> | <b>Fault Detection Rate</b> | <b>Optimal Feature Subset Size</b> | <b>Model Accuracy</b> | <b>False Alarm Rate</b> | <b>Area Under the Curve</b> |
|-----------------|-------------------|-----------------------------|------------------------------------|-----------------------|-------------------------|-----------------------------|
| 4               | 114-115           | 0.97                        | 24                                 | 0.99                  | 0.00                    | 1.00                        |
| 4               | 115-116           | 0.98                        | 24                                 | 0.99                  | 0.00                    | 1.00                        |
| 4               | 116-117           | 0.93                        | 43                                 | 0.97                  | 0.00                    | 1.00                        |
| 4               | 117-118           | 0.94                        | 61                                 | 0.97                  | 0.00                    | 1.00                        |
| 4               | 118-119           | 0.98                        | 35                                 | 0.99                  | 0.00                    | 1.00                        |
| 4               | 119-120           | 0.97                        | 28                                 | 0.98                  | 0.00                    | 1.00                        |
| 5               | 2-3               | 0.77                        | 8                                  | 0.49                  | 0.80                    | 0.89                        |
| 5               | 3-4               | 0.58                        | 13                                 | 0.50                  | 0.64                    | 0.92                        |
| 5               | 4-5               | 0.57                        | 25                                 | 0.65                  | 0.28                    | 0.72                        |
| 5               | 5-6               | 0.73                        | 8                                  | 0.50                  | 0.99                    | 1.00                        |
| 5               | 6-7               | 0.65                        | 32                                 | 0.62                  | 0.42                    | 0.67                        |
| 5               | 7-8               | 0.78                        | 18                                 | 0.76                  | 0.26                    | 0.83                        |
| 5               | 8-9               | 0.53                        | 125                                | 0.56                  | 0.40                    | 0.63                        |
| 5               | 9-10              | 0.91                        | 211                                | 0.52                  | 0.88                    | 0.45                        |
| 5               | 10-11             | 0.66                        | 36                                 | 0.65                  | 0.36                    | 0.71                        |
| 5               | 11-12             | 0.67                        | 125                                | 0.64                  | 0.38                    | 0.70                        |
| 5               | 12-13             | 0.62                        | 135                                | 0.57                  | 0.49                    | 0.56                        |
| 5               | 13-14             | 0.68                        | 23                                 | 0.67                  | 0.33                    | 0.73                        |
| 5               | 14-15             | 0.69                        | 9                                  | 0.66                  | 0.37                    | 0.70                        |
| 5               | 15-16             | 0.66                        | 43                                 | 0.67                  | 0.33                    | 0.72                        |
| 5               | 16-17             | 0.65                        | 57                                 | 0.63                  | 0.39                    | 0.68                        |
| 5               | 17-18             | 0.86                        | 19                                 | 0.51                  | 0.84                    | 0.51                        |
| 5               | 18-19             | 0.50                        | 1                                  | 0.50                  | 0.51                    | 0.51                        |
| 5               | 19-20             | 0.59                        | 21                                 | 0.49                  | 0.62                    | 0.48                        |
| 5               | 20-21             | 0.86                        | 1                                  | 0.93                  | 0.01                    | 0.96                        |
| 5               | 21-22             | 0.91                        | 4                                  | 0.95                  | 0.01                    | 1.00                        |

*Continued on next page*

Table S2 – Continued from previous page

| <b>Fault No</b> | <b>Sample Bin</b> | <b>Fault Detection Rate</b> | <b>Optimal Feature Subset Size</b> | <b>Model Accuracy</b> | <b>False Alarm Rate</b> | <b>Area Under the Curve</b> |
|-----------------|-------------------|-----------------------------|------------------------------------|-----------------------|-------------------------|-----------------------------|
| 5               | 22-23             | 0.90                        | 7                                  | 0.95                  | 0.00                    | 0.99                        |
| 5               | 23-24             | 0.93                        | 7                                  | 0.97                  | 0.00                    | 0.99                        |
| 5               | 24-25             | 0.93                        | 11                                 | 0.96                  | 0.00                    | 0.99                        |
| 5               | 25-26             | 0.91                        | 6                                  | 0.95                  | 0.00                    | 0.97                        |
| 5               | 26-27             | 0.83                        | 4                                  | 0.92                  | 0.00                    | 0.97                        |
| 5               | 27-28             | 0.86                        | 1                                  | 0.93                  | 0.00                    | 0.98                        |
| 5               | 28-29             | 0.90                        | 16                                 | 0.95                  | 0.00                    | 0.98                        |
| 5               | 29-30             | 0.87                        | 4                                  | 0.94                  | 0.00                    | 0.97                        |
| 5               | 30-31             | 0.86                        | 2                                  | 0.93                  | 0.00                    | 0.97                        |
| 5               | 31-32             | 0.83                        | 2                                  | 0.91                  | 0.00                    | 0.97                        |
| 5               | 32-33             | 0.83                        | 2                                  | 0.91                  | 0.00                    | 0.96                        |
| 5               | 33-34             | 0.80                        | 24                                 | 0.90                  | 0.00                    | 0.96                        |
| 5               | 34-35             | 0.80                        | 25                                 | 0.90                  | 0.00                    | 0.96                        |
| 5               | 35-36             | 0.79                        | 20                                 | 0.90                  | 0.00                    | 0.96                        |
| 5               | 36-37             | 0.79                        | 4                                  | 0.90                  | 0.00                    | 0.96                        |
| 5               | 37-38             | 0.79                        | 2                                  | 0.89                  | 0.00                    | 0.95                        |
| 5               | 38-39             | 0.78                        | 15                                 | 0.89                  | 0.00                    | 0.95                        |
| 5               | 39-40             | 0.81                        | 57                                 | 0.86                  | 0.09                    | 0.93                        |
| 5               | 40-41             | 0.79                        | 70                                 | 0.84                  | 0.11                    | 0.92                        |
| 5               | 41-42             | 0.79                        | 7                                  | 0.89                  | 0.00                    | 0.94                        |
| 5               | 42-43             | 0.75                        | 27                                 | 0.88                  | 0.00                    | 0.92                        |
| 5               | 43-44             | 0.76                        | 64                                 | 0.84                  | 0.07                    | 0.92                        |
| 5               | 44-45             | 0.76                        | 10                                 | 0.88                  | 0.00                    | 0.93                        |
| 5               | 45-46             | 0.75                        | 14                                 | 0.87                  | 0.00                    | 0.92                        |
| 5               | 46-47             | 0.74                        | 17                                 | 0.87                  | 0.00                    | 0.93                        |
| 5               | 47-48             | 0.74                        | 1                                  | 0.87                  | 0.00                    | 0.92                        |

*Continued on next page*

Table S2 – Continued from previous page

| <b>Fault No</b> | <b>Sample Bin</b> | <b>Fault Detection Rate</b> | <b>Optimal Feature Subset Size</b> | <b>Model Accuracy</b> | <b>False Alarm Rate</b> | <b>Area Under the Curve</b> |
|-----------------|-------------------|-----------------------------|------------------------------------|-----------------------|-------------------------|-----------------------------|
| 5               | 48-49             | 0.75                        | 2                                  | 0.88                  | 0.00                    | 0.91                        |
| 5               | 49-50             | 0.73                        | 2                                  | 0.87                  | 0.00                    | 0.92                        |
| 5               | 50-51             | 0.72                        | 5                                  | 0.86                  | 0.00                    | 0.90                        |
| 5               | 51-52             | 0.70                        | 5                                  | 0.85                  | 0.00                    | 0.91                        |
| 5               | 52-53             | 0.70                        | 1                                  | 0.85                  | 0.00                    | 0.91                        |
| 5               | 53-54             | 0.70                        | 28                                 | 0.85                  | 0.00                    | 0.90                        |
| 5               | 54-55             | 0.70                        | 28                                 | 0.85                  | 0.00                    | 0.90                        |
| 5               | 55-56             | 0.73                        | 13                                 | 0.86                  | 0.00                    | 0.90                        |
| 5               | 56-57             | 0.73                        | 29                                 | 0.87                  | 0.00                    | 0.90                        |
| 5               | 57-58             | 0.72                        | 3                                  | 0.86                  | 0.00                    | 0.89                        |
| 5               | 58-59             | 0.73                        | 27                                 | 0.86                  | 0.00                    | 0.90                        |
| 5               | 59-60             | 0.72                        | 29                                 | 0.86                  | 0.00                    | 0.90                        |
| 5               | 60-61             | 0.72                        | 2                                  | 0.86                  | 0.00                    | 0.89                        |
| 5               | 61-62             | 0.72                        | 5                                  | 0.86                  | 0.00                    | 0.89                        |
| 5               | 62-63             | 0.73                        | 2                                  | 0.86                  | 0.00                    | 0.89                        |
| 5               | 63-64             | 0.73                        | 1                                  | 0.86                  | 0.00                    | 0.89                        |
| 5               | 64-65             | 0.72                        | 1                                  | 0.86                  | 0.00                    | 0.88                        |
| 5               | 65-66             | 0.72                        | 1                                  | 0.86                  | 0.00                    | 0.87                        |
| 5               | 66-67             | 0.72                        | 2                                  | 0.86                  | 0.00                    | 0.87                        |
| 5               | 67-68             | 0.70                        | 1                                  | 0.85                  | 0.00                    | 0.86                        |
| 5               | 68-69             | 0.70                        | 1                                  | 0.85                  | 0.00                    | 0.86                        |
| 5               | 69-70             | 0.71                        | 4                                  | 0.85                  | 0.00                    | 0.88                        |
| 5               | 70-71             | 0.70                        | 3                                  | 0.85                  | 0.00                    | 0.87                        |
| 5               | 71-72             | 0.70                        | 4                                  | 0.85                  | 0.00                    | 0.87                        |
| 5               | 72-73             | 0.71                        | 1                                  | 0.85                  | 0.00                    | 0.88                        |
| 5               | 73-74             | 0.69                        | 3                                  | 0.85                  | 0.00                    | 0.86                        |

*Continued on next page*

Table S2 – Continued from previous page

| <b>Fault No</b> | <b>Sample Bin</b> | <b>Fault Detection Rate</b> | <b>Optimal Feature Subset Size</b> | <b>Model Accuracy</b> | <b>False Alarm Rate</b> | <b>Area Under the Curve</b> |
|-----------------|-------------------|-----------------------------|------------------------------------|-----------------------|-------------------------|-----------------------------|
| 5               | 74-75             | 0.70                        | 4                                  | 0.85                  | 0.00                    | 0.87                        |
| 5               | 75-76             | 0.70                        | 1                                  | 0.85                  | 0.00                    | 0.86                        |
| 5               | 76-77             | 0.69                        | 2                                  | 0.84                  | 0.00                    | 0.86                        |
| 5               | 77-78             | 0.70                        | 4                                  | 0.85                  | 0.00                    | 0.86                        |
| 5               | 78-79             | 0.71                        | 10                                 | 0.85                  | 0.00                    | 0.87                        |
| 5               | 79-80             | 0.71                        | 2                                  | 0.85                  | 0.00                    | 0.87                        |
| 5               | 80-81             | 0.71                        | 3                                  | 0.85                  | 0.00                    | 0.87                        |
| 5               | 81-82             | 0.71                        | 2                                  | 0.86                  | 0.00                    | 0.86                        |
| 5               | 82-83             | 0.72                        | 2                                  | 0.86                  | 0.00                    | 0.87                        |
| 5               | 83-84             | 0.73                        | 11                                 | 0.86                  | 0.00                    | 0.88                        |
| 5               | 84-85             | 0.73                        | 3                                  | 0.87                  | 0.00                    | 0.88                        |
| 5               | 85-86             | 0.74                        | 2                                  | 0.87                  | 0.00                    | 0.88                        |
| 5               | 86-87             | 0.75                        | 2                                  | 0.88                  | 0.00                    | 0.89                        |
| 5               | 87-88             | 0.77                        | 2                                  | 0.88                  | 0.00                    | 0.89                        |
| 5               | 88-89             | 0.77                        | 5                                  | 0.88                  | 0.00                    | 0.90                        |
| 5               | 89-90             | 0.78                        | 3                                  | 0.89                  | 0.00                    | 0.90                        |
| 5               | 90-91             | 0.80                        | 2                                  | 0.90                  | 0.00                    | 0.91                        |
| 5               | 91-92             | 0.80                        | 3                                  | 0.90                  | 0.00                    | 0.92                        |
| 5               | 92-93             | 0.83                        | 6                                  | 0.91                  | 0.00                    | 0.92                        |
| 5               | 93-94             | 0.83                        | 12                                 | 0.92                  | 0.00                    | 0.92                        |
| 5               | 94-95             | 0.85                        | 11                                 | 0.92                  | 0.00                    | 0.93                        |
| 5               | 95-96             | 0.85                        | 2                                  | 0.92                  | 0.00                    | 0.94                        |
| 5               | 96-97             | 0.85                        | 9                                  | 0.92                  | 0.00                    | 0.94                        |
| 5               | 97-98             | 0.86                        | 3                                  | 0.93                  | 0.00                    | 0.95                        |
| 5               | 98-99             | 0.87                        | 9                                  | 0.94                  | 0.00                    | 0.95                        |
| 5               | 99-100            | 0.89                        | 2                                  | 0.94                  | 0.00                    | 0.95                        |

*Continued on next page*

Table S2 – *Continued from previous page*

| <b>Fault No</b> | <b>Sample Bin</b> | <b>Fault Detection Rate</b> | <b>Optimal Feature Subset Size</b> | <b>Model Accuracy</b> | <b>False Alarm Rate</b> | <b>Area Under the Curve</b> |
|-----------------|-------------------|-----------------------------|------------------------------------|-----------------------|-------------------------|-----------------------------|
| 5               | 100-101           | 0.90                        | 2                                  | 0.95                  | 0.00                    | 0.96                        |
| 5               | 101-102           | 0.92                        | 4                                  | 0.96                  | 0.00                    | 0.97                        |
| 5               | 102-103           | 0.93                        | 1                                  | 0.96                  | 0.00                    | 0.98                        |
| 5               | 103-104           | 0.93                        | 6                                  | 0.96                  | 0.00                    | 0.98                        |
| 5               | 104-105           | 0.95                        | 10                                 | 0.97                  | 0.00                    | 0.98                        |
| 5               | 105-106           | 0.96                        | 10                                 | 0.98                  | 0.00                    | 0.99                        |
| 5               | 106-107           | 0.97                        | 1                                  | 0.98                  | 0.01                    | 0.99                        |
| 5               | 107-108           | 0.98                        | 4                                  | 0.99                  | 0.00                    | 1.00                        |
| 5               | 108-109           | 0.99                        | 2                                  | 0.99                  | 0.00                    | 1.00                        |
| 5               | 109-110           | 0.98                        | 4                                  | 0.99                  | 0.00                    | 1.00                        |
| 5               | 110-111           | 0.99                        | 6                                  | 0.99                  | 0.00                    | 1.00                        |
| 5               | 111-112           | 0.99                        | 9                                  | 1.00                  | 0.00                    | 1.00                        |
| 5               | 112-113           | 0.99                        | 10                                 | 1.00                  | 0.00                    | 1.00                        |
| 5               | 113-114           | 0.99                        | 9                                  | 1.00                  | 0.00                    | 1.00                        |
| 5               | 114-115           | 0.99                        | 8                                  | 1.00                  | 0.00                    | 1.00                        |
| 5               | 115-116           | 1.00                        | 5                                  | 1.00                  | 0.00                    | 1.00                        |
| 5               | 116-117           | 1.00                        | 6                                  | 1.00                  | 0.00                    | 1.00                        |
| 5               | 117-118           | 1.00                        | 11                                 | 1.00                  | 0.00                    | 1.00                        |
| 5               | 118-119           | 1.00                        | 5                                  | 1.00                  | 0.00                    | 1.00                        |
| 5               | 119-120           | 1.00                        | 16                                 | 1.00                  | 0.00                    | 1.00                        |
| 6               | 2-3               | 0.96                        | 185                                | 0.53                  | 0.91                    | 0.48                        |
| 6               | 3-4               | 0.65                        | 138                                | 0.68                  | 0.30                    | 0.73                        |
| 6               | 4-5               | 0.78                        | 78                                 | 0.78                  | 0.22                    | 0.87                        |
| 6               | 5-6               | 0.63                        | 266                                | 0.57                  | 0.51                    | 0.55                        |
| 6               | 6-7               | 0.64                        | 48                                 | 0.71                  | 0.23                    | 0.80                        |
| 6               | 7-8               | 0.58                        | 1                                  | 0.61                  | 0.37                    | 0.65                        |

*Continued on next page*

Table S2 – Continued from previous page

| <b>Fault No</b> | <b>Sample Bin</b> | <b>Fault Detection Rate</b> | <b>Optimal Feature Subset Size</b> | <b>Model Accuracy</b> | <b>False Alarm Rate</b> | <b>Area Under the Curve</b> |
|-----------------|-------------------|-----------------------------|------------------------------------|-----------------------|-------------------------|-----------------------------|
| 6               | 8-9               | 0.69                        | 25                                 | 0.72                  | 0.25                    | 0.78                        |
| 6               | 9-10              | 0.70                        | 78                                 | 0.72                  | 0.26                    | 0.79                        |
| 6               | 10-11             | 0.63                        | 55                                 | 0.69                  | 0.25                    | 0.77                        |
| 6               | 11-12             | 0.71                        | 86                                 | 0.74                  | 0.23                    | 0.83                        |
| 6               | 12-13             | 0.69                        | 75                                 | 0.74                  | 0.20                    | 0.83                        |
| 6               | 13-14             | 0.60                        | 55                                 | 0.69                  | 0.22                    | 0.76                        |
| 6               | 14-15             | 0.67                        | 60                                 | 0.70                  | 0.28                    | 0.77                        |
| 6               | 15-16             | 0.66                        | 85                                 | 0.67                  | 0.32                    | 0.74                        |
| 6               | 16-17             | 0.70                        | 51                                 | 0.72                  | 0.26                    | 0.80                        |
| 6               | 17-18             | 0.70                        | 87                                 | 0.73                  | 0.23                    | 0.81                        |
| 6               | 18-19             | 0.64                        | 92                                 | 0.71                  | 0.22                    | 0.79                        |
| 6               | 19-20             | 0.64                        | 46                                 | 0.74                  | 0.16                    | 0.82                        |
| 6               | 20-21             | 0.98                        | 83                                 | 0.56                  | 0.86                    | 0.67                        |
| 6               | 21-22             | 0.68                        | 3                                  | 0.83                  | 0.02                    | 0.88                        |
| 6               | 22-23             | 0.71                        | 6                                  | 0.84                  | 0.02                    | 0.91                        |
| 6               | 23-24             | 0.72                        | 5                                  | 0.85                  | 0.03                    | 0.91                        |
| 6               | 24-25             | 0.73                        | 6                                  | 0.86                  | 0.01                    | 0.91                        |
| 6               | 25-26             | 0.60                        | 2                                  | 0.80                  | 0.00                    | 0.90                        |
| 6               | 26-27             | 0.64                        | 57                                 | 0.78                  | 0.09                    | 0.86                        |
| 6               | 27-28             | 0.60                        | 1                                  | 0.80                  | 0.00                    | 0.89                        |
| 6               | 28-29             | 0.61                        | 1                                  | 0.80                  | 0.00                    | 0.92                        |
| 6               | 29-30             | 0.73                        | 3                                  | 0.86                  | 0.01                    | 0.93                        |
| 6               | 30-31             | 0.73                        | 116                                | 0.77                  | 0.20                    | 0.85                        |
| 6               | 31-32             | 0.70                        | 3                                  | 0.85                  | 0.00                    | 0.91                        |
| 6               | 32-33             | 0.71                        | 1                                  | 0.85                  | 0.01                    | 0.92                        |
| 6               | 33-34             | 0.57                        | 24                                 | 0.78                  | 0.00                    | 0.91                        |

*Continued on next page*

Table S2 – *Continued from previous page*

| <b>Fault No</b> | <b>Sample Bin</b> | <b>Fault Detection Rate</b> | <b>Optimal Feature Subset Size</b> | <b>Model Accuracy</b> | <b>False Alarm Rate</b> | <b>Area Under the Curve</b> |
|-----------------|-------------------|-----------------------------|------------------------------------|-----------------------|-------------------------|-----------------------------|
| 6               | 34-35             | 0.62                        | 1                                  | 0.81                  | 0.00                    | 0.92                        |
| 6               | 35-36             | 0.63                        | 76                                 | 0.75                  | 0.12                    | 0.83                        |
| 6               | 36-37             | 0.67                        | 11                                 | 0.83                  | 0.00                    | 0.93                        |
| 6               | 37-38             | 0.68                        | 45                                 | 0.79                  | 0.09                    | 0.88                        |
| 6               | 38-39             | 0.68                        | 5                                  | 0.84                  | 0.00                    | 0.94                        |
| 6               | 39-40             | 0.70                        | 2                                  | 0.85                  | 0.00                    | 0.95                        |
| 6               | 40-41             | 0.71                        | 1                                  | 0.85                  | 0.00                    | 0.93                        |
| 6               | 41-42             | 0.70                        | 8                                  | 0.85                  | 0.00                    | 0.96                        |
| 6               | 42-43             | 0.75                        | 2                                  | 0.87                  | 0.00                    | 0.95                        |
| 6               | 43-44             | 0.71                        | 3                                  | 0.85                  | 0.00                    | 0.95                        |
| 6               | 44-45             | 0.71                        | 1                                  | 0.86                  | 0.00                    | 0.94                        |
| 6               | 45-46             | 0.70                        | 1                                  | 0.85                  | 0.00                    | 0.94                        |
| 6               | 46-47             | 0.62                        | 69                                 | 0.76                  | 0.09                    | 0.83                        |
| 6               | 47-48             | 0.69                        | 2                                  | 0.84                  | 0.00                    | 0.95                        |
| 6               | 48-49             | 0.67                        | 3                                  | 0.84                  | 0.00                    | 0.95                        |
| 6               | 49-50             | 0.58                        | 23                                 | 0.79                  | 0.00                    | 0.93                        |
| 6               | 50-51             | 0.68                        | 2                                  | 0.84                  | 0.00                    | 0.95                        |
| 6               | 51-52             | 0.67                        | 1                                  | 0.84                  | 0.00                    | 0.94                        |
| 6               | 52-53             | 0.59                        | 2                                  | 0.80                  | 0.00                    | 0.94                        |
| 6               | 53-54             | 0.66                        | 4                                  | 0.83                  | 0.00                    | 0.95                        |
| 6               | 54-55             | 0.60                        | 74                                 | 0.75                  | 0.10                    | 0.82                        |
| 6               | 55-56             | 0.67                        | 2                                  | 0.83                  | 0.00                    | 0.95                        |
| 6               | 56-57             | 0.66                        | 2                                  | 0.83                  | 0.00                    | 0.95                        |
| 6               | 57-58             | 0.66                        | 3                                  | 0.83                  | 0.00                    | 0.94                        |
| 6               | 58-59             | 0.67                        | 1                                  | 0.84                  | 0.00                    | 0.94                        |
| 6               | 59-60             | 0.67                        | 23                                 | 0.83                  | 0.00                    | 0.94                        |

*Continued on next page*

Table S2 – *Continued from previous page*

| <b>Fault No</b> | <b>Sample Bin</b> | <b>Fault Detection Rate</b> | <b>Optimal Feature Subset Size</b> | <b>Model Accuracy</b> | <b>False Alarm Rate</b> | <b>Area Under the Curve</b> |
|-----------------|-------------------|-----------------------------|------------------------------------|-----------------------|-------------------------|-----------------------------|
| 6               | 60-61             | 0.66                        | 8                                  | 0.83                  | 0.00                    | 0.96                        |
| 6               | 61-62             | 0.66                        | 2                                  | 0.83                  | 0.00                    | 0.95                        |
| 6               | 62-63             | 0.59                        | 58                                 | 0.74                  | 0.11                    | 0.82                        |
| 6               | 63-64             | 0.69                        | 16                                 | 0.84                  | 0.00                    | 0.95                        |
| 6               | 64-65             | 0.65                        | 1                                  | 0.82                  | 0.00                    | 0.94                        |
| 6               | 65-66             | 0.67                        | 1                                  | 0.83                  | 0.00                    | 0.94                        |
| 6               | 66-67             | 0.67                        | 2                                  | 0.83                  | 0.00                    | 0.95                        |
| 6               | 67-68             | 0.65                        | 4                                  | 0.83                  | 0.00                    | 0.95                        |
| 6               | 68-69             | 0.66                        | 2                                  | 0.83                  | 0.00                    | 0.96                        |
| 6               | 69-70             | 0.65                        | 2                                  | 0.83                  | 0.00                    | 0.95                        |
| 6               | 70-71             | 0.66                        | 24                                 | 0.83                  | 0.00                    | 0.94                        |
| 6               | 71-72             | 0.65                        | 1                                  | 0.83                  | 0.00                    | 0.95                        |
| 6               | 72-73             | 0.65                        | 2                                  | 0.83                  | 0.00                    | 0.96                        |
| 6               | 73-74             | 0.71                        | 11                                 | 0.85                  | 0.00                    | 0.94                        |
| 6               | 74-75             | 0.69                        | 52                                 | 0.75                  | 0.19                    | 0.82                        |
| 6               | 75-76             | 0.66                        | 12                                 | 0.83                  | 0.00                    | 0.93                        |
| 6               | 76-77             | 0.68                        | 15                                 | 0.84                  | 0.00                    | 0.95                        |
| 6               | 77-78             | 0.65                        | 23                                 | 0.82                  | 0.00                    | 0.95                        |
| 6               | 78-79             | 0.64                        | 23                                 | 0.82                  | 0.00                    | 0.95                        |
| 6               | 79-80             | 0.64                        | 1                                  | 0.82                  | 0.00                    | 0.95                        |
| 6               | 80-81             | 0.66                        | 61                                 | 0.74                  | 0.17                    | 0.82                        |
| 6               | 81-82             | 0.64                        | 60                                 | 0.76                  | 0.13                    | 0.83                        |
| 6               | 82-83             | 0.60                        | 70                                 | 0.74                  | 0.13                    | 0.81                        |
| 6               | 83-84             | 0.64                        | 1                                  | 0.82                  | 0.00                    | 0.96                        |
| 6               | 84-85             | 0.64                        | 1                                  | 0.82                  | 0.00                    | 0.97                        |
| 6               | 85-86             | 0.67                        | 63                                 | 0.75                  | 0.18                    | 0.82                        |

*Continued on next page*



Table S2 – Continued from previous page

| <b>Fault No</b> | <b>Sample Bin</b> | <b>Fault Detection Rate</b> | <b>Optimal Feature Subset Size</b> | <b>Model Accuracy</b> | <b>False Alarm Rate</b> | <b>Area Under the Curve</b> |
|-----------------|-------------------|-----------------------------|------------------------------------|-----------------------|-------------------------|-----------------------------|
| 6               | 86-87             | 0.63                        | 1                                  | 0.81                  | 0.00                    | 0.96                        |
| 6               | 87-88             | 0.63                        | 2                                  | 0.81                  | 0.00                    | 0.97                        |
| 6               | 88-89             | 0.63                        | 1                                  | 0.82                  | 0.00                    | 0.97                        |
| 6               | 89-90             | 0.64                        | 24                                 | 0.82                  | 0.00                    | 0.95                        |
| 6               | 90-91             | 0.63                        | 23                                 | 0.82                  | 0.00                    | 0.96                        |
| 6               | 91-92             | 0.65                        | 1                                  | 0.82                  | 0.00                    | 0.97                        |
| 6               | 92-93             | 0.56                        | 61                                 | 0.73                  | 0.10                    | 0.80                        |
| 6               | 93-94             | 0.64                        | 1                                  | 0.82                  | 0.00                    | 0.96                        |
| 6               | 94-95             | 0.59                        | 56                                 | 0.74                  | 0.10                    | 0.82                        |
| 6               | 95-96             | 0.64                        | 1                                  | 0.82                  | 0.00                    | 0.97                        |
| 6               | 96-97             | 0.69                        | 1                                  | 0.84                  | 0.00                    | 0.97                        |
| 6               | 97-98             | 0.65                        | 1                                  | 0.83                  | 0.00                    | 0.97                        |
| 6               | 98-99             | 0.63                        | 1                                  | 0.82                  | 0.00                    | 0.97                        |
| 6               | 99-100            | 0.63                        | 24                                 | 0.82                  | 0.00                    | 0.95                        |
| 6               | 100-101           | 0.64                        | 24                                 | 0.82                  | 0.00                    | 0.95                        |
| 6               | 101-102           | 0.63                        | 24                                 | 0.81                  | 0.00                    | 0.95                        |
| 6               | 102-103           | 0.63                        | 24                                 | 0.81                  | 0.00                    | 0.95                        |
| 6               | 103-104           | 0.64                        | 1                                  | 0.82                  | 0.00                    | 0.97                        |
| 6               | 104-105           | 0.64                        | 23                                 | 0.82                  | 0.00                    | 0.95                        |
| 6               | 105-106           | 0.65                        | 24                                 | 0.83                  | 0.00                    | 0.94                        |
| 6               | 106-107           | 0.64                        | 23                                 | 0.82                  | 0.00                    | 0.96                        |
| 6               | 107-108           | 0.63                        | 2                                  | 0.82                  | 0.00                    | 0.98                        |
| 6               | 108-109           | 0.65                        | 1                                  | 0.82                  | 0.00                    | 0.98                        |
| 6               | 109-110           | 0.65                        | 1                                  | 0.83                  | 0.00                    | 0.98                        |
| 6               | 110-111           | 0.66                        | 1                                  | 0.83                  | 0.00                    | 0.98                        |
| 6               | 111-112           | 0.65                        | 1                                  | 0.83                  | 0.00                    | 0.98                        |

*Continued on next page*

Table S2 – Continued from previous page

| <b>Fault No</b> | <b>Sample Bin</b> | <b>Fault Detection Rate</b> | <b>Optimal Feature Subset Size</b> | <b>Model Accuracy</b> | <b>False Alarm Rate</b> | <b>Area Under the Curve</b> |
|-----------------|-------------------|-----------------------------|------------------------------------|-----------------------|-------------------------|-----------------------------|
| 6               | 112-113           | 0.67                        | 1                                  | 0.84                  | 0.00                    | 0.99                        |
| 6               | 113-114           | 0.66                        | 2                                  | 0.83                  | 0.00                    | 0.99                        |
| 6               | 114-115           | 0.66                        | 3                                  | 0.83                  | 0.00                    | 0.99                        |
| 6               | 115-116           | 0.67                        | 1                                  | 0.83                  | 0.00                    | 0.99                        |
| 6               | 116-117           | 0.67                        | 2                                  | 0.83                  | 0.00                    | 0.99                        |
| 6               | 117-118           | 0.68                        | 1                                  | 0.84                  | 0.00                    | 0.99                        |
| 6               | 118-119           | 0.67                        | 1                                  | 0.83                  | 0.00                    | 0.99                        |
| 6               | 119-120           | 0.67                        | 1                                  | 0.84                  | 0.00                    | 0.99                        |
| 7               | 2-3               | 1.00                        | 1                                  | 1.00                  | 0.00                    | 1.00                        |
| 7               | 3-4               | 1.00                        | 1                                  | 1.00                  | 0.00                    | 1.00                        |
| 7               | 4-5               | 1.00                        | 1                                  | 1.00                  | 0.00                    | 1.00                        |
| 7               | 5-6               | 0.97                        | 3                                  | 0.99                  | 0.00                    | 1.00                        |
| 7               | 6-7               | 1.00                        | 1                                  | 1.00                  | 0.00                    | 1.00                        |
| 7               | 7-8               | 0.90                        | 1                                  | 0.95                  | 0.00                    | 1.00                        |
| 7               | 8-9               | 1.00                        | 17                                 | 1.00                  | 0.00                    | 1.00                        |
| 7               | 9-10              | 0.91                        | 66                                 | 0.94                  | 0.03                    | 0.99                        |
| 7               | 10-11             | 0.91                        | 47                                 | 0.95                  | 0.02                    | 0.99                        |
| 7               | 11-12             | 0.87                        | 4                                  | 0.94                  | 0.00                    | 1.00                        |
| 7               | 12-13             | 0.89                        | 2                                  | 0.95                  | 0.00                    | 1.00                        |
| 7               | 13-14             | 0.88                        | 5                                  | 0.94                  | 0.00                    | 1.00                        |
| 7               | 14-15             | 0.86                        | 49                                 | 0.92                  | 0.02                    | 0.97                        |
| 7               | 15-16             | 0.85                        | 3                                  | 0.92                  | 0.00                    | 0.99                        |
| 7               | 16-17             | 0.84                        | 18                                 | 0.92                  | 0.00                    | 1.00                        |
| 7               | 17-18             | 0.83                        | 11                                 | 0.91                  | 0.00                    | 1.00                        |
| 7               | 18-19             | 0.83                        | 1                                  | 0.91                  | 0.00                    | 1.00                        |
| 7               | 19-20             | 0.83                        | 21                                 | 0.92                  | 0.00                    | 1.00                        |

*Continued on next page*

Table S2 – *Continued from previous page*

| <b>Fault No</b> | <b>Sample Bin</b> | <b>Fault Detection Rate</b> | <b>Optimal Feature Subset Size</b> | <b>Model Accuracy</b> | <b>False Alarm Rate</b> | <b>Area Under the Curve</b> |
|-----------------|-------------------|-----------------------------|------------------------------------|-----------------------|-------------------------|-----------------------------|
| 7               | 20-21             | 0.82                        | 22                                 | 0.91                  | 0.00                    | 1.00                        |
| 7               | 21-22             | 0.73                        | 3                                  | 0.86                  | 0.00                    | 1.00                        |
| 7               | 22-23             | 0.79                        | 2                                  | 0.90                  | 0.00                    | 1.00                        |
| 7               | 23-24             | 0.77                        | 4                                  | 0.89                  | 0.00                    | 1.00                        |
| 7               | 24-25             | 0.78                        | 22                                 | 0.89                  | 0.00                    | 1.00                        |
| 7               | 25-26             | 0.77                        | 8                                  | 0.89                  | 0.00                    | 1.00                        |
| 7               | 26-27             | 0.78                        | 11                                 | 0.89                  | 0.00                    | 1.00                        |
| 7               | 27-28             | 0.76                        | 4                                  | 0.88                  | 0.00                    | 1.00                        |
| 7               | 28-29             | 0.76                        | 6                                  | 0.88                  | 0.00                    | 1.00                        |
| 7               | 29-30             | 0.77                        | 6                                  | 0.89                  | 0.00                    | 1.00                        |
| 7               | 30-31             | 1.00                        | 1                                  | 1.00                  | 0.00                    | 1.00                        |
| 7               | 31-32             | 0.95                        | 4                                  | 0.97                  | 0.00                    | 1.00                        |
| 7               | 32-33             | 1.00                        | 3                                  | 1.00                  | 0.00                    | 1.00                        |
| 7               | 33-34             | 1.00                        | 11                                 | 1.00                  | 0.00                    | 1.00                        |
| 7               | 34-35             | 1.00                        | 2                                  | 1.00                  | 0.00                    | 1.00                        |
| 7               | 35-36             | 1.00                        | 7                                  | 1.00                  | 0.00                    | 1.00                        |
| 7               | 36-37             | 1.00                        | 1                                  | 1.00                  | 0.00                    | 1.00                        |
| 7               | 37-38             | 1.00                        | 3                                  | 1.00                  | 0.00                    | 1.00                        |
| 7               | 38-39             | 1.00                        | 1                                  | 1.00                  | 0.00                    | 1.00                        |
| 7               | 39-40             | 1.00                        | 1                                  | 1.00                  | 0.00                    | 1.00                        |
| 7               | 40-41             | 1.00                        | 5                                  | 1.00                  | 0.00                    | 1.00                        |
| 7               | 41-42             | 1.00                        | 2                                  | 1.00                  | 0.00                    | 1.00                        |
| 7               | 42-43             | 1.00                        | 2                                  | 1.00                  | 0.00                    | 1.00                        |
| 7               | 43-44             | 0.97                        | 9                                  | 0.99                  | 0.00                    | 1.00                        |
| 7               | 44-45             | 1.00                        | 2                                  | 1.00                  | 0.00                    | 1.00                        |
| 7               | 45-46             | 1.00                        | 1                                  | 1.00                  | 0.00                    | 1.00                        |

*Continued on next page*

Table S2 – Continued from previous page

| <b>Fault No</b> | <b>Sample Bin</b> | <b>Fault Detection Rate</b> | <b>Optimal Feature Subset Size</b> | <b>Model Accuracy</b> | <b>False Alarm Rate</b> | <b>Area Under the Curve</b> |
|-----------------|-------------------|-----------------------------|------------------------------------|-----------------------|-------------------------|-----------------------------|
| 7               | 46-47             | 1.00                        | 2                                  | 1.00                  | 0.00                    | 1.00                        |
| 7               | 47-48             | 1.00                        | 4                                  | 1.00                  | 0.00                    | 1.00                        |
| 7               | 48-49             | 1.00                        | 2                                  | 1.00                  | 0.00                    | 1.00                        |
| 7               | 49-50             | 1.00                        | 2                                  | 1.00                  | 0.00                    | 1.00                        |
| 7               | 50-51             | 1.00                        | 1                                  | 1.00                  | 0.00                    | 1.00                        |
| 7               | 51-52             | 1.00                        | 6                                  | 1.00                  | 0.00                    | 1.00                        |
| 7               | 52-53             | 1.00                        | 5                                  | 1.00                  | 0.00                    | 1.00                        |
| 7               | 53-54             | 1.00                        | 4                                  | 1.00                  | 0.00                    | 1.00                        |
| 7               | 54-55             | 1.00                        | 1                                  | 1.00                  | 0.00                    | 1.00                        |
| 7               | 55-56             | 1.00                        | 3                                  | 1.00                  | 0.00                    | 1.00                        |
| 7               | 56-57             | 1.00                        | 1                                  | 1.00                  | 0.00                    | 1.00                        |
| 7               | 57-58             | 0.97                        | 16                                 | 0.98                  | 0.00                    | 1.00                        |
| 7               | 58-59             | 1.00                        | 3                                  | 1.00                  | 0.00                    | 1.00                        |
| 7               | 59-60             | 1.00                        | 1                                  | 1.00                  | 0.00                    | 1.00                        |
| 7               | 60-61             | 1.00                        | 7                                  | 1.00                  | 0.00                    | 1.00                        |
| 7               | 61-62             | 1.00                        | 1                                  | 1.00                  | 0.00                    | 1.00                        |
| 7               | 62-63             | 1.00                        | 4                                  | 1.00                  | 0.00                    | 1.00                        |
| 7               | 63-64             | 1.00                        | 4                                  | 1.00                  | 0.00                    | 1.00                        |
| 7               | 64-65             | 1.00                        | 5                                  | 1.00                  | 0.00                    | 1.00                        |
| 7               | 65-66             | 1.00                        | 3                                  | 1.00                  | 0.00                    | 1.00                        |
| 7               | 66-67             | 1.00                        | 3                                  | 1.00                  | 0.00                    | 1.00                        |
| 7               | 67-68             | 1.00                        | 3                                  | 1.00                  | 0.00                    | 1.00                        |
| 7               | 68-69             | 0.96                        | 8                                  | 0.98                  | 0.00                    | 1.00                        |
| 7               | 69-70             | 0.95                        | 5                                  | 0.98                  | 0.00                    | 1.00                        |
| 7               | 70-71             | 1.00                        | 1                                  | 1.00                  | 0.00                    | 1.00                        |
| 7               | 71-72             | 1.00                        | 4                                  | 1.00                  | 0.00                    | 1.00                        |

*Continued on next page*

Table S2 – *Continued from previous page*

| <b>Fault No</b> | <b>Sample Bin</b> | <b>Fault Detection Rate</b> | <b>Optimal Feature Subset Size</b> | <b>Model Accuracy</b> | <b>False Alarm Rate</b> | <b>Area Under the Curve</b> |
|-----------------|-------------------|-----------------------------|------------------------------------|-----------------------|-------------------------|-----------------------------|
| 7               | 72-73             | 1.00                        | 1                                  | 1.00                  | 0.00                    | 1.00                        |
| 7               | 73-74             | 1.00                        | 5                                  | 1.00                  | 0.00                    | 1.00                        |
| 7               | 74-75             | 0.95                        | 14                                 | 0.97                  | 0.00                    | 1.00                        |
| 7               | 75-76             | 0.96                        | 7                                  | 0.98                  | 0.00                    | 1.00                        |
| 7               | 76-77             | 1.00                        | 4                                  | 1.00                  | 0.00                    | 1.00                        |
| 7               | 77-78             | 1.00                        | 5                                  | 1.00                  | 0.00                    | 1.00                        |
| 7               | 78-79             | 1.00                        | 11                                 | 1.00                  | 0.00                    | 1.00                        |
| 7               | 79-80             | 1.00                        | 2                                  | 1.00                  | 0.00                    | 1.00                        |
| 7               | 80-81             | 1.00                        | 4                                  | 1.00                  | 0.00                    | 1.00                        |
| 7               | 81-82             | 1.00                        | 4                                  | 1.00                  | 0.00                    | 1.00                        |
| 7               | 82-83             | 1.00                        | 4                                  | 1.00                  | 0.00                    | 1.00                        |
| 7               | 83-84             | 0.95                        | 10                                 | 0.98                  | 0.00                    | 1.00                        |
| 7               | 84-85             | 1.00                        | 1                                  | 1.00                  | 0.00                    | 1.00                        |
| 7               | 85-86             | 1.00                        | 10                                 | 1.00                  | 0.00                    | 1.00                        |
| 7               | 86-87             | 0.95                        | 5                                  | 0.98                  | 0.00                    | 1.00                        |
| 7               | 87-88             | 1.00                        | 4                                  | 1.00                  | 0.00                    | 1.00                        |
| 7               | 88-89             | 1.00                        | 4                                  | 1.00                  | 0.00                    | 1.00                        |
| 7               | 89-90             | 1.00                        | 6                                  | 1.00                  | 0.00                    | 1.00                        |
| 7               | 90-91             | 0.96                        | 11                                 | 0.98                  | 0.00                    | 1.00                        |
| 7               | 91-92             | 0.96                        | 14                                 | 0.98                  | 0.00                    | 1.00                        |
| 7               | 92-93             | 1.00                        | 1                                  | 1.00                  | 0.00                    | 1.00                        |
| 7               | 93-94             | 1.00                        | 12                                 | 1.00                  | 0.00                    | 1.00                        |
| 7               | 94-95             | 1.00                        | 6                                  | 1.00                  | 0.00                    | 1.00                        |
| 7               | 95-96             | 1.00                        | 7                                  | 1.00                  | 0.00                    | 1.00                        |
| 7               | 96-97             | 1.00                        | 1                                  | 1.00                  | 0.00                    | 1.00                        |
| 7               | 97-98             | 1.00                        | 3                                  | 1.00                  | 0.00                    | 1.00                        |

*Continued on next page*

Table S2 – Continued from previous page

| <b>Fault No</b> | <b>Sample Bin</b> | <b>Fault Detection Rate</b> | <b>Optimal Feature Subset Size</b> | <b>Model Accuracy</b> | <b>False Alarm Rate</b> | <b>Area Under the Curve</b> |
|-----------------|-------------------|-----------------------------|------------------------------------|-----------------------|-------------------------|-----------------------------|
| 7               | 98-99             | 0.94                        | 10                                 | 0.97                  | 0.00                    | 1.00                        |
| 7               | 99-100            | 1.00                        | 6                                  | 1.00                  | 0.00                    | 1.00                        |
| 7               | 100-101           | 1.00                        | 1                                  | 1.00                  | 0.00                    | 1.00                        |
| 7               | 101-102           | 1.00                        | 5                                  | 1.00                  | 0.00                    | 1.00                        |
| 7               | 102-103           | 1.00                        | 6                                  | 1.00                  | 0.00                    | 1.00                        |
| 7               | 103-104           | 1.00                        | 11                                 | 1.00                  | 0.00                    | 1.00                        |
| 7               | 104-105           | 1.00                        | 3                                  | 1.00                  | 0.00                    | 1.00                        |
| 7               | 105-106           | 1.00                        | 5                                  | 1.00                  | 0.00                    | 1.00                        |
| 7               | 106-107           | 0.95                        | 15                                 | 0.98                  | 0.00                    | 1.00                        |
| 7               | 107-108           | 1.00                        | 1                                  | 1.00                  | 0.00                    | 1.00                        |
| 7               | 108-109           | 1.00                        | 1                                  | 1.00                  | 0.00                    | 1.00                        |
| 7               | 109-110           | 0.96                        | 17                                 | 0.98                  | 0.00                    | 1.00                        |
| 7               | 110-111           | 0.95                        | 15                                 | 0.98                  | 0.00                    | 1.00                        |
| 7               | 111-112           | 1.00                        | 1                                  | 1.00                  | 0.00                    | 1.00                        |
| 7               | 112-113           | 1.00                        | 6                                  | 1.00                  | 0.00                    | 1.00                        |
| 7               | 113-114           | 1.00                        | 1                                  | 1.00                  | 0.00                    | 1.00                        |
| 7               | 114-115           | 1.00                        | 1                                  | 1.00                  | 0.00                    | 1.00                        |
| 7               | 115-116           | 0.95                        | 12                                 | 0.97                  | 0.00                    | 1.00                        |
| 7               | 116-117           | 1.00                        | 1                                  | 1.00                  | 0.00                    | 1.00                        |
| 7               | 117-118           | 1.00                        | 4                                  | 1.00                  | 0.00                    | 1.00                        |
| 7               | 118-119           | 1.00                        | 1                                  | 1.00                  | 0.00                    | 1.00                        |
| 7               | 119-120           | 0.75                        | 1                                  | 0.88                  | 0.00                    | 1.00                        |
| 8               | 2-3               | 0.90                        | 30                                 | 0.93                  | 0.04                    | 0.99                        |
| 8               | 3-4               | 0.85                        | 16                                 | 0.88                  | 0.09                    | 0.96                        |
| 8               | 4-5               | 0.92                        | 21                                 | 0.94                  | 0.05                    | 0.99                        |
| 8               | 5-6               | 0.98                        | 38                                 | 0.97                  | 0.03                    | 1.00                        |

*Continued on next page*

Table S2 – Continued from previous page

| <b>Fault No</b> | <b>Sample Bin</b> | <b>Fault Detection Rate</b> | <b>Optimal Feature Subset Size</b> | <b>Model Accuracy</b> | <b>False Alarm Rate</b> | <b>Area Under the Curve</b> |
|-----------------|-------------------|-----------------------------|------------------------------------|-----------------------|-------------------------|-----------------------------|
| 8               | 6-7               | 0.83                        | 34                                 | 0.89                  | 0.05                    | 0.96                        |
| 8               | 7-8               | 0.82                        | 23                                 | 0.88                  | 0.06                    | 0.96                        |
| 8               | 8-9               | 0.83                        | 43                                 | 0.89                  | 0.04                    | 0.96                        |
| 8               | 9-10              | 0.86                        | 53                                 | 0.88                  | 0.10                    | 0.95                        |
| 8               | 10-11             | 0.85                        | 94                                 | 0.86                  | 0.13                    | 0.94                        |
| 8               | 11-12             | 0.83                        | 69                                 | 0.86                  | 0.12                    | 0.93                        |
| 8               | 12-13             | 0.83                        | 69                                 | 0.88                  | 0.06                    | 0.95                        |
| 8               | 13-14             | 0.87                        | 85                                 | 0.88                  | 0.11                    | 0.95                        |
| 8               | 14-15             | 0.75                        | 64                                 | 0.85                  | 0.06                    | 0.92                        |
| 8               | 15-16             | 0.80                        | 38                                 | 0.82                  | 0.17                    | 0.89                        |
| 8               | 16-17             | 0.74                        | 69                                 | 0.81                  | 0.12                    | 0.89                        |
| 8               | 17-18             | 0.68                        | 66                                 | 0.79                  | 0.09                    | 0.88                        |
| 8               | 18-19             | 0.84                        | 42                                 | 0.87                  | 0.09                    | 0.94                        |
| 8               | 19-20             | 0.83                        | 52                                 | 0.85                  | 0.13                    | 0.93                        |
| 8               | 20-21             | 0.83                        | 69                                 | 0.85                  | 0.13                    | 0.92                        |
| 8               | 21-22             | 0.98                        | 2                                  | 0.99                  | 0.00                    | 1.00                        |
| 8               | 22-23             | 0.85                        | 5                                  | 0.92                  | 0.00                    | 0.98                        |
| 8               | 23-24             | 0.97                        | 5                                  | 0.98                  | 0.00                    | 0.99                        |
| 8               | 24-25             | 0.98                        | 2                                  | 0.99                  | 0.00                    | 1.00                        |
| 8               | 25-26             | 0.98                        | 10                                 | 0.99                  | 0.00                    | 1.00                        |
| 8               | 26-27             | 0.98                        | 6                                  | 0.99                  | 0.00                    | 1.00                        |
| 8               | 27-28             | 0.98                        | 4                                  | 0.99                  | 0.00                    | 1.00                        |
| 8               | 28-29             | 0.97                        | 3                                  | 0.99                  | 0.00                    | 1.00                        |
| 8               | 29-30             | 0.99                        | 14                                 | 0.99                  | 0.00                    | 1.00                        |
| 8               | 30-31             | 0.99                        | 4                                  | 1.00                  | 0.00                    | 1.00                        |
| 8               | 31-32             | 0.99                        | 7                                  | 1.00                  | 0.00                    | 1.00                        |

*Continued on next page*

Table S2 – Continued from previous page

| <b>Fault No</b> | <b>Sample Bin</b> | <b>Fault Detection Rate</b> | <b>Optimal Feature Subset Size</b> | <b>Model Accuracy</b> | <b>False Alarm Rate</b> | <b>Area Under the Curve</b> |
|-----------------|-------------------|-----------------------------|------------------------------------|-----------------------|-------------------------|-----------------------------|
| 8               | 32-33             | 0.99                        | 2                                  | 0.99                  | 0.00                    | 1.00                        |
| 8               | 33-34             | 0.99                        | 2                                  | 1.00                  | 0.00                    | 1.00                        |
| 8               | 34-35             | 0.99                        | 3                                  | 1.00                  | 0.00                    | 1.00                        |
| 8               | 35-36             | 1.00                        | 6                                  | 1.00                  | 0.00                    | 1.00                        |
| 8               | 36-37             | 0.98                        | 6                                  | 0.99                  | 0.00                    | 1.00                        |
| 8               | 37-38             | 0.98                        | 9                                  | 0.99                  | 0.00                    | 1.00                        |
| 8               | 38-39             | 0.98                        | 7                                  | 0.99                  | 0.00                    | 1.00                        |
| 8               | 39-40             | 0.98                        | 4                                  | 0.99                  | 0.00                    | 1.00                        |
| 8               | 40-41             | 0.97                        | 5                                  | 0.99                  | 0.00                    | 1.00                        |
| 8               | 41-42             | 0.97                        | 5                                  | 0.98                  | 0.00                    | 1.00                        |
| 8               | 42-43             | 0.97                        | 2                                  | 0.99                  | 0.00                    | 1.00                        |
| 8               | 43-44             | 0.98                        | 8                                  | 0.99                  | 0.00                    | 1.00                        |
| 8               | 44-45             | 0.97                        | 6                                  | 0.98                  | 0.00                    | 1.00                        |
| 8               | 45-46             | 0.98                        | 9                                  | 0.99                  | 0.00                    | 1.00                        |
| 8               | 46-47             | 0.97                        | 3                                  | 0.99                  | 0.00                    | 1.00                        |
| 8               | 47-48             | 0.97                        | 11                                 | 0.98                  | 0.00                    | 1.00                        |
| 8               | 48-49             | 0.97                        | 14                                 | 0.99                  | 0.00                    | 1.00                        |
| 8               | 49-50             | 0.97                        | 6                                  | 0.99                  | 0.00                    | 1.00                        |
| 8               | 50-51             | 0.98                        | 10                                 | 0.99                  | 0.00                    | 1.00                        |
| 8               | 51-52             | 0.97                        | 7                                  | 0.99                  | 0.00                    | 1.00                        |
| 8               | 52-53             | 0.98                        | 3                                  | 0.99                  | 0.00                    | 1.00                        |
| 8               | 53-54             | 0.98                        | 7                                  | 0.99                  | 0.00                    | 1.00                        |
| 8               | 54-55             | 0.97                        | 22                                 | 0.99                  | 0.00                    | 1.00                        |
| 8               | 55-56             | 0.98                        | 41                                 | 0.99                  | 0.00                    | 1.00                        |
| 8               | 56-57             | 0.98                        | 4                                  | 0.99                  | 0.00                    | 1.00                        |
| 8               | 57-58             | 0.98                        | 3                                  | 0.99                  | 0.00                    | 1.00                        |

*Continued on next page*



Table S2 – *Continued from previous page*

| <b>Fault No</b> | <b>Sample Bin</b> | <b>Fault Detection Rate</b> | <b>Optimal Feature Subset Size</b> | <b>Model Accuracy</b> | <b>False Alarm Rate</b> | <b>Area Under the Curve</b> |
|-----------------|-------------------|-----------------------------|------------------------------------|-----------------------|-------------------------|-----------------------------|
| 8               | 58-59             | 0.97                        | 4                                  | 0.99                  | 0.00                    | 1.00                        |
| 8               | 59-60             | 0.97                        | 3                                  | 0.99                  | 0.00                    | 1.00                        |
| 8               | 60-61             | 0.97                        | 13                                 | 0.98                  | 0.00                    | 1.00                        |
| 8               | 61-62             | 0.97                        | 42                                 | 0.98                  | 0.00                    | 1.00                        |
| 8               | 62-63             | 0.97                        | 53                                 | 0.98                  | 0.00                    | 1.00                        |
| 8               | 63-64             | 0.98                        | 50                                 | 0.99                  | 0.00                    | 1.00                        |
| 8               | 64-65             | 0.99                        | 20                                 | 0.99                  | 0.00                    | 1.00                        |
| 8               | 65-66             | 0.98                        | 13                                 | 0.99                  | 0.00                    | 1.00                        |
| 8               | 66-67             | 0.98                        | 3                                  | 0.99                  | 0.00                    | 1.00                        |
| 8               | 67-68             | 0.98                        | 9                                  | 0.99                  | 0.00                    | 1.00                        |
| 8               | 68-69             | 0.98                        | 9                                  | 0.99                  | 0.00                    | 1.00                        |
| 8               | 69-70             | 0.98                        | 6                                  | 0.99                  | 0.00                    | 1.00                        |
| 8               | 70-71             | 0.98                        | 6                                  | 0.99                  | 0.00                    | 1.00                        |
| 8               | 71-72             | 0.98                        | 8                                  | 0.99                  | 0.00                    | 1.00                        |
| 8               | 72-73             | 0.97                        | 11                                 | 0.99                  | 0.00                    | 1.00                        |
| 8               | 73-74             | 0.97                        | 3                                  | 0.99                  | 0.00                    | 1.00                        |
| 8               | 74-75             | 0.98                        | 12                                 | 0.99                  | 0.00                    | 1.00                        |
| 8               | 75-76             | 0.99                        | 18                                 | 0.99                  | 0.00                    | 1.00                        |
| 8               | 76-77             | 0.98                        | 35                                 | 0.99                  | 0.00                    | 1.00                        |
| 8               | 77-78             | 0.98                        | 35                                 | 0.99                  | 0.00                    | 1.00                        |
| 8               | 78-79             | 0.98                        | 40                                 | 0.99                  | 0.00                    | 1.00                        |
| 8               | 79-80             | 0.98                        | 32                                 | 0.99                  | 0.00                    | 1.00                        |
| 8               | 80-81             | 0.98                        | 34                                 | 0.99                  | 0.00                    | 1.00                        |
| 8               | 81-82             | 0.98                        | 10                                 | 0.99                  | 0.00                    | 1.00                        |
| 8               | 82-83             | 0.99                        | 37                                 | 1.00                  | 0.00                    | 1.00                        |
| 8               | 83-84             | 0.99                        | 6                                  | 0.99                  | 0.00                    | 1.00                        |

*Continued on next page*

Table S2 – Continued from previous page

| <b>Fault No</b> | <b>Sample Bin</b> | <b>Fault Detection Rate</b> | <b>Optimal Feature Subset Size</b> | <b>Model Accuracy</b> | <b>False Alarm Rate</b> | <b>Area Under the Curve</b> |
|-----------------|-------------------|-----------------------------|------------------------------------|-----------------------|-------------------------|-----------------------------|
| 8               | 84-85             | 0.98                        | 2                                  | 0.99                  | 0.00                    | 1.00                        |
| 8               | 85-86             | 0.98                        | 40                                 | 0.99                  | 0.00                    | 1.00                        |
| 8               | 86-87             | 0.99                        | 68                                 | 0.99                  | 0.00                    | 1.00                        |
| 8               | 87-88             | 0.99                        | 50                                 | 0.99                  | 0.00                    | 1.00                        |
| 8               | 88-89             | 0.98                        | 48                                 | 0.99                  | 0.00                    | 1.00                        |
| 8               | 89-90             | 0.98                        | 73                                 | 0.99                  | 0.00                    | 1.00                        |
| 8               | 90-91             | 0.99                        | 36                                 | 0.99                  | 0.00                    | 1.00                        |
| 8               | 91-92             | 0.98                        | 36                                 | 0.99                  | 0.00                    | 1.00                        |
| 8               | 92-93             | 0.99                        | 16                                 | 0.99                  | 0.01                    | 1.00                        |
| 8               | 93-94             | 0.99                        | 14                                 | 0.99                  | 0.00                    | 1.00                        |
| 8               | 94-95             | 0.98                        | 39                                 | 0.99                  | 0.00                    | 1.00                        |
| 8               | 95-96             | 0.99                        | 8                                  | 0.99                  | 0.01                    | 1.00                        |
| 8               | 96-97             | 0.99                        | 25                                 | 0.99                  | 0.00                    | 1.00                        |
| 8               | 97-98             | 0.99                        | 64                                 | 0.99                  | 0.00                    | 1.00                        |
| 8               | 98-99             | 0.99                        | 66                                 | 0.99                  | 0.00                    | 1.00                        |
| 8               | 99-100            | 0.98                        | 66                                 | 0.99                  | 0.00                    | 1.00                        |
| 8               | 100-101           | 0.98                        | 3                                  | 0.99                  | 0.00                    | 1.00                        |
| 8               | 101-102           | 0.99                        | 21                                 | 0.99                  | 0.00                    | 1.00                        |
| 8               | 102-103           | 0.99                        | 21                                 | 1.00                  | 0.00                    | 1.00                        |
| 8               | 103-104           | 0.99                        | 37                                 | 0.99                  | 0.00                    | 1.00                        |
| 8               | 104-105           | 0.99                        | 42                                 | 0.99                  | 0.00                    | 1.00                        |
| 8               | 105-106           | 0.99                        | 57                                 | 0.99                  | 0.00                    | 1.00                        |
| 8               | 106-107           | 0.99                        | 67                                 | 0.99                  | 0.00                    | 1.00                        |
| 8               | 107-108           | 0.99                        | 6                                  | 0.99                  | 0.00                    | 1.00                        |
| 8               | 108-109           | 0.99                        | 72                                 | 0.99                  | 0.00                    | 1.00                        |
| 8               | 109-110           | 1.00                        | 51                                 | 1.00                  | 0.00                    | 1.00                        |

*Continued on next page*

Table S2 – Continued from previous page

| <b>Fault No</b> | <b>Sample Bin</b> | <b>Fault Detection Rate</b> | <b>Optimal Feature Subset Size</b> | <b>Model Accuracy</b> | <b>False Alarm Rate</b> | <b>Area Under the Curve</b> |
|-----------------|-------------------|-----------------------------|------------------------------------|-----------------------|-------------------------|-----------------------------|
| 8               | 110-111           | 0.99                        | 31                                 | 1.00                  | 0.00                    | 1.00                        |
| 8               | 111-112           | 1.00                        | 19                                 | 1.00                  | 0.00                    | 1.00                        |
| 8               | 112-113           | 1.00                        | 8                                  | 1.00                  | 0.00                    | 1.00                        |
| 8               | 113-114           | 1.00                        | 44                                 | 1.00                  | 0.00                    | 1.00                        |
| 8               | 114-115           | 0.99                        | 72                                 | 1.00                  | 0.00                    | 1.00                        |
| 8               | 115-116           | 1.00                        | 77                                 | 1.00                  | 0.00                    | 1.00                        |
| 8               | 116-117           | 0.99                        | 74                                 | 1.00                  | 0.00                    | 1.00                        |
| 8               | 117-118           | 0.99                        | 73                                 | 1.00                  | 0.00                    | 1.00                        |
| 8               | 118-119           | 1.00                        | 7                                  | 1.00                  | 0.00                    | 1.00                        |
| 8               | 119-120           | 0.99                        | 70                                 | 1.00                  | 0.00                    | 1.00                        |
| 9               | 2-3               | 0.98                        | 55                                 | 0.98                  | 0.02                    | 1.00                        |
| 9               | 3-4               | 0.95                        | 25                                 | 0.97                  | 0.01                    | 1.00                        |
| 9               | 4-5               | 0.73                        | 24                                 | 0.85                  | 0.03                    | 0.93                        |
| 9               | 5-6               | 0.76                        | 19                                 | 0.85                  | 0.06                    | 0.95                        |
| 9               | 6-7               | 0.75                        | 26                                 | 0.84                  | 0.07                    | 0.94                        |
| 9               | 7-8               | 0.58                        | 33                                 | 0.78                  | 0.01                    | 0.84                        |
| 9               | 8-9               | 0.64                        | 47                                 | 0.80                  | 0.03                    | 0.86                        |
| 9               | 9-10              | 0.60                        | 75                                 | 0.77                  | 0.07                    | 0.87                        |
| 9               | 10-11             | 0.56                        | 21                                 | 0.74                  | 0.08                    | 0.81                        |
| 9               | 11-12             | 0.51                        | 23                                 | 0.71                  | 0.09                    | 0.81                        |
| 9               | 12-13             | 0.46                        | 64                                 | 0.72                  | 0.02                    | 0.83                        |
| 9               | 13-14             | 0.41                        | 22                                 | 0.70                  | 0.00                    | 0.76                        |
| 9               | 14-15             | 0.59                        | 8                                  | 0.71                  | 0.18                    | 0.78                        |
| 9               | 15-16             | 0.40                        | 5                                  | 0.70                  | 0.00                    | 0.76                        |
| 9               | 16-17             | 0.51                        | 29                                 | 0.73                  | 0.05                    | 0.79                        |
| 9               | 17-18             | 0.43                        | 31                                 | 0.70                  | 0.02                    | 0.78                        |

*Continued on next page*

Table S2 – Continued from previous page

| <b>Fault No</b> | <b>Sample Bin</b> | <b>Fault Detection Rate</b> | <b>Optimal Feature Subset Size</b> | <b>Model Accuracy</b> | <b>False Alarm Rate</b> | <b>Area Under the Curve</b> |
|-----------------|-------------------|-----------------------------|------------------------------------|-----------------------|-------------------------|-----------------------------|
| 9               | 18-19             | 0.43                        | 25                                 | 0.70                  | 0.03                    | 0.77                        |
| 9               | 19-20             | 0.35                        | 7                                  | 0.66                  | 0.02                    | 0.73                        |
| 9               | 20-21             | 0.31                        | 3                                  | 0.66                  | 0.00                    | 0.70                        |
| 9               | 21-22             | 0.61                        | 36                                 | 0.72                  | 0.18                    | 0.79                        |
| 9               | 22-23             | 0.54                        | 31                                 | 0.69                  | 0.16                    | 0.76                        |
| 9               | 23-24             | 0.52                        | 41                                 | 0.70                  | 0.11                    | 0.76                        |
| 9               | 24-25             | 0.44                        | 27                                 | 0.68                  | 0.07                    | 0.77                        |
| 9               | 25-26             | 0.45                        | 30                                 | 0.69                  | 0.06                    | 0.79                        |
| 9               | 26-27             | 0.35                        | 36                                 | 0.67                  | 0.02                    | 0.75                        |
| 9               | 27-28             | 0.53                        | 36                                 | 0.71                  | 0.10                    | 0.78                        |
| 9               | 28-29             | 0.43                        | 92                                 | 0.69                  | 0.05                    | 0.76                        |
| 9               | 29-30             | 0.56                        | 32                                 | 0.71                  | 0.14                    | 0.79                        |
| 9               | 30-31             | 0.62                        | 38                                 | 0.73                  | 0.16                    | 0.81                        |
| 9               | 31-32             | 0.50                        | 67                                 | 0.70                  | 0.10                    | 0.78                        |
| 9               | 32-33             | 0.50                        | 75                                 | 0.70                  | 0.10                    | 0.76                        |
| 9               | 33-34             | 0.54                        | 49                                 | 0.72                  | 0.09                    | 0.80                        |
| 9               | 34-35             | 0.58                        | 57                                 | 0.74                  | 0.10                    | 0.81                        |
| 9               | 35-36             | 0.56                        | 77                                 | 0.72                  | 0.12                    | 0.80                        |
| 9               | 36-37             | 0.55                        | 62                                 | 0.73                  | 0.09                    | 0.79                        |
| 9               | 37-38             | 0.56                        | 73                                 | 0.74                  | 0.08                    | 0.80                        |
| 9               | 38-39             | 0.57                        | 62                                 | 0.72                  | 0.13                    | 0.80                        |
| 9               | 39-40             | 0.55                        | 65                                 | 0.71                  | 0.12                    | 0.80                        |
| 9               | 40-41             | 0.54                        | 59                                 | 0.72                  | 0.10                    | 0.79                        |
| 9               | 41-42             | 0.58                        | 101                                | 0.72                  | 0.15                    | 0.78                        |
| 9               | 42-43             | 0.49                        | 104                                | 0.70                  | 0.08                    | 0.77                        |
| 9               | 43-44             | 0.77                        | 1                                  | 0.53                  | 0.72                    | 0.54                        |

*Continued on next page*

Table S2 – Continued from previous page

| <b>Fault No</b> | <b>Sample Bin</b> | <b>Fault Detection Rate</b> | <b>Optimal Feature Subset Size</b> | <b>Model Accuracy</b> | <b>False Alarm Rate</b> | <b>Area Under the Curve</b> |
|-----------------|-------------------|-----------------------------|------------------------------------|-----------------------|-------------------------|-----------------------------|
| 9               | 44-45             | 0.54                        | 31                                 | 0.71                  | 0.11                    | 0.78                        |
| 9               | 45-46             | 0.83                        | 2                                  | 0.51                  | 0.80                    | 0.52                        |
| 9               | 46-47             | 0.62                        | 74                                 | 0.72                  | 0.18                    | 0.78                        |
| 9               | 47-48             | 0.52                        | 74                                 | 0.71                  | 0.10                    | 0.79                        |
| 9               | 48-49             | 0.55                        | 99                                 | 0.70                  | 0.15                    | 0.77                        |
| 9               | 49-50             | 0.50                        | 77                                 | 0.70                  | 0.11                    | 0.77                        |
| 9               | 50-51             | 0.51                        | 65                                 | 0.71                  | 0.10                    | 0.77                        |
| 9               | 51-52             | 0.57                        | 77                                 | 0.71                  | 0.16                    | 0.77                        |
| 9               | 52-53             | 0.81                        | 1                                  | 0.51                  | 0.80                    | 0.50                        |
| 9               | 53-54             | 0.80                        | 2                                  | 0.52                  | 0.76                    | 0.53                        |
| 9               | 54-55             | 0.55                        | 78                                 | 0.70                  | 0.15                    | 0.77                        |
| 9               | 55-56             | 0.57                        | 79                                 | 0.72                  | 0.13                    | 0.78                        |
| 9               | 56-57             | 0.49                        | 67                                 | 0.69                  | 0.12                    | 0.76                        |
| 9               | 57-58             | 0.50                        | 47                                 | 0.69                  | 0.12                    | 0.76                        |
| 9               | 58-59             | 0.54                        | 57                                 | 0.71                  | 0.12                    | 0.79                        |
| 9               | 59-60             | 0.52                        | 63                                 | 0.71                  | 0.10                    | 0.79                        |
| 9               | 60-61             | 0.44                        | 87                                 | 0.68                  | 0.07                    | 0.76                        |
| 9               | 61-62             | 0.40                        | 46                                 | 0.67                  | 0.06                    | 0.76                        |
| 9               | 62-63             | 0.44                        | 75                                 | 0.69                  | 0.07                    | 0.75                        |
| 9               | 63-64             | 0.46                        | 71                                 | 0.69                  | 0.09                    | 0.76                        |
| 9               | 64-65             | 0.43                        | 63                                 | 0.67                  | 0.09                    | 0.75                        |
| 9               | 65-66             | 0.37                        | 66                                 | 0.67                  | 0.04                    | 0.75                        |
| 9               | 66-67             | 0.44                        | 55                                 | 0.68                  | 0.08                    | 0.75                        |
| 9               | 67-68             | 0.43                        | 42                                 | 0.68                  | 0.07                    | 0.76                        |
| 9               | 68-69             | 0.42                        | 89                                 | 0.67                  | 0.07                    | 0.73                        |
| 9               | 69-70             | 0.44                        | 66                                 | 0.68                  | 0.09                    | 0.74                        |

*Continued on next page*

Table S2 – Continued from previous page

| <b>Fault No</b> | <b>Sample Bin</b> | <b>Fault Detection Rate</b> | <b>Optimal Feature Subset Size</b> | <b>Model Accuracy</b> | <b>False Alarm Rate</b> | <b>Area Under the Curve</b> |
|-----------------|-------------------|-----------------------------|------------------------------------|-----------------------|-------------------------|-----------------------------|
| 9               | 70-71             | 0.35                        | 78                                 | 0.66                  | 0.03                    | 0.74                        |
| 9               | 71-72             | 0.37                        | 89                                 | 0.67                  | 0.03                    | 0.73                        |
| 9               | 72-73             | 0.43                        | 64                                 | 0.67                  | 0.10                    | 0.74                        |
| 9               | 73-74             | 0.49                        | 53                                 | 0.69                  | 0.11                    | 0.75                        |
| 9               | 74-75             | 0.49                        | 64                                 | 0.68                  | 0.13                    | 0.75                        |
| 9               | 75-76             | 0.43                        | 69                                 | 0.66                  | 0.11                    | 0.73                        |
| 9               | 76-77             | 0.45                        | 98                                 | 0.67                  | 0.12                    | 0.72                        |
| 9               | 77-78             | 0.36                        | 6                                  | 0.66                  | 0.04                    | 0.71                        |
| 9               | 78-79             | 0.32                        | 76                                 | 0.64                  | 0.04                    | 0.72                        |
| 9               | 79-80             | 0.29                        | 89                                 | 0.64                  | 0.01                    | 0.73                        |
| 9               | 80-81             | 0.41                        | 84                                 | 0.66                  | 0.08                    | 0.74                        |
| 9               | 81-82             | 0.44                        | 85                                 | 0.67                  | 0.11                    | 0.73                        |
| 9               | 82-83             | 0.44                        | 81                                 | 0.66                  | 0.12                    | 0.72                        |
| 9               | 83-84             | 0.37                        | 95                                 | 0.64                  | 0.08                    | 0.70                        |
| 9               | 84-85             | 0.39                        | 57                                 | 0.66                  | 0.07                    | 0.73                        |
| 9               | 85-86             | 0.41                        | 71                                 | 0.66                  | 0.08                    | 0.74                        |
| 9               | 86-87             | 0.44                        | 49                                 | 0.67                  | 0.11                    | 0.75                        |
| 9               | 87-88             | 0.49                        | 71                                 | 0.67                  | 0.15                    | 0.73                        |
| 9               | 88-89             | 0.48                        | 84                                 | 0.67                  | 0.13                    | 0.74                        |
| 9               | 89-90             | 0.41                        | 74                                 | 0.66                  | 0.08                    | 0.72                        |
| 9               | 90-91             | 0.37                        | 62                                 | 0.64                  | 0.08                    | 0.71                        |
| 9               | 91-92             | 0.31                        | 56                                 | 0.63                  | 0.04                    | 0.68                        |
| 9               | 92-93             | 0.31                        | 46                                 | 0.63                  | 0.04                    | 0.69                        |
| 9               | 93-94             | 0.31                        | 115                                | 0.63                  | 0.05                    | 0.69                        |
| 9               | 94-95             | 0.42                        | 64                                 | 0.65                  | 0.12                    | 0.72                        |
| 9               | 95-96             | 0.33                        | 72                                 | 0.64                  | 0.05                    | 0.69                        |

*Continued on next page*

Table S2 – Continued from previous page

| <b>Fault No</b> | <b>Sample Bin</b> | <b>Fault Detection Rate</b> | <b>Optimal Feature Subset Size</b> | <b>Model Accuracy</b> | <b>False Alarm Rate</b> | <b>Area Under the Curve</b> |
|-----------------|-------------------|-----------------------------|------------------------------------|-----------------------|-------------------------|-----------------------------|
| 9               | 96-97             | 0.33                        | 88                                 | 0.63                  | 0.08                    | 0.69                        |
| 9               | 97-98             | 0.45                        | 92                                 | 0.66                  | 0.14                    | 0.72                        |
| 9               | 98-99             | 0.43                        | 63                                 | 0.64                  | 0.15                    | 0.70                        |
| 9               | 99-100            | 0.37                        | 73                                 | 0.65                  | 0.08                    | 0.70                        |
| 9               | 100-101           | 0.43                        | 54                                 | 0.64                  | 0.15                    | 0.70                        |
| 9               | 101-102           | 0.39                        | 62                                 | 0.64                  | 0.10                    | 0.70                        |
| 9               | 102-103           | 0.37                        | 53                                 | 0.64                  | 0.10                    | 0.70                        |
| 9               | 103-104           | 0.45                        | 33                                 | 0.65                  | 0.16                    | 0.70                        |
| 9               | 104-105           | 0.44                        | 74                                 | 0.65                  | 0.14                    | 0.71                        |
| 9               | 105-106           | 0.33                        | 81                                 | 0.63                  | 0.08                    | 0.69                        |
| 9               | 106-107           | 0.41                        | 1                                  | 0.52                  | 0.36                    | 0.54                        |
| 9               | 107-108           | 0.35                        | 91                                 | 0.62                  | 0.11                    | 0.67                        |
| 9               | 108-109           | 0.37                        | 55                                 | 0.62                  | 0.12                    | 0.68                        |
| 9               | 109-110           | 0.42                        | 61                                 | 0.63                  | 0.15                    | 0.70                        |
| 9               | 110-111           | 0.43                        | 72                                 | 0.64                  | 0.15                    | 0.69                        |
| 9               | 111-112           | 0.39                        | 44                                 | 0.62                  | 0.15                    | 0.67                        |
| 9               | 112-113           | 0.36                        | 49                                 | 0.62                  | 0.11                    | 0.67                        |
| 9               | 113-114           | 0.41                        | 50                                 | 0.63                  | 0.16                    | 0.68                        |
| 9               | 114-115           | 0.40                        | 45                                 | 0.62                  | 0.16                    | 0.67                        |
| 9               | 115-116           | 0.42                        | 58                                 | 0.63                  | 0.16                    | 0.68                        |
| 9               | 116-117           | 0.34                        | 46                                 | 0.62                  | 0.10                    | 0.67                        |
| 9               | 117-118           | 0.31                        | 46                                 | 0.61                  | 0.09                    | 0.66                        |
| 9               | 118-119           | 0.42                        | 56                                 | 0.63                  | 0.16                    | 0.68                        |
| 9               | 119-120           | 0.43                        | 62                                 | 0.64                  | 0.16                    | 0.69                        |
| 10              | 2-3               | 0.99                        | 24                                 | 0.93                  | 0.12                    | 1.00                        |
| 10              | 3-4               | 0.94                        | 12                                 | 0.93                  | 0.08                    | 0.97                        |

*Continued on next page*

Table S2 – Continued from previous page

| <b>Fault No</b> | <b>Sample Bin</b> | <b>Fault Detection Rate</b> | <b>Optimal Feature Subset Size</b> | <b>Model Accuracy</b> | <b>False Alarm Rate</b> | <b>Area Under the Curve</b> |
|-----------------|-------------------|-----------------------------|------------------------------------|-----------------------|-------------------------|-----------------------------|
| 10              | 4-5               | 0.91                        | 28                                 | 0.93                  | 0.04                    | 0.99                        |
| 10              | 5-6               | 0.89                        | 29                                 | 0.89                  | 0.11                    | 0.97                        |
| 10              | 6-7               | 0.78                        | 13                                 | 0.84                  | 0.10                    | 0.91                        |
| 10              | 7-8               | 0.73                        | 75                                 | 0.84                  | 0.05                    | 0.91                        |
| 10              | 8-9               | 0.86                        | 79                                 | 0.86                  | 0.13                    | 0.94                        |
| 10              | 9-10              | 0.83                        | 56                                 | 0.88                  | 0.06                    | 0.96                        |
| 10              | 10-11             | 0.86                        | 49                                 | 0.87                  | 0.13                    | 0.94                        |
| 10              | 11-12             | 0.84                        | 35                                 | 0.88                  | 0.07                    | 0.96                        |
| 10              | 12-13             | 0.85                        | 51                                 | 0.89                  | 0.08                    | 0.97                        |
| 10              | 13-14             | 0.79                        | 42                                 | 0.87                  | 0.04                    | 0.95                        |
| 10              | 14-15             | 0.84                        | 46                                 | 0.90                  | 0.05                    | 0.96                        |
| 10              | 15-16             | 0.84                        | 57                                 | 0.91                  | 0.03                    | 0.96                        |
| 10              | 16-17             | 0.83                        | 63                                 | 0.90                  | 0.04                    | 0.97                        |
| 10              | 17-18             | 0.82                        | 37                                 | 0.90                  | 0.02                    | 0.97                        |
| 10              | 18-19             | 0.80                        | 57                                 | 0.88                  | 0.04                    | 0.94                        |
| 10              | 19-20             | 0.80                        | 53                                 | 0.87                  | 0.05                    | 0.94                        |
| 10              | 20-21             | 0.80                        | 40                                 | 0.89                  | 0.03                    | 0.95                        |
| 10              | 21-22             | 0.73                        | 5                                  | 0.86                  | 0.02                    | 0.94                        |
| 10              | 22-23             | 0.66                        | 31                                 | 0.82                  | 0.03                    | 0.91                        |
| 10              | 23-24             | 0.74                        | 4                                  | 0.87                  | 0.00                    | 0.96                        |
| 10              | 24-25             | 0.62                        | 63                                 | 0.78                  | 0.07                    | 0.88                        |
| 10              | 25-26             | 0.63                        | 65                                 | 0.77                  | 0.08                    | 0.86                        |
| 10              | 26-27             | 0.61                        | 62                                 | 0.77                  | 0.08                    | 0.84                        |
| 10              | 27-28             | 0.49                        | 86                                 | 0.73                  | 0.04                    | 0.81                        |
| 10              | 28-29             | 0.48                        | 78                                 | 0.73                  | 0.03                    | 0.81                        |
| 10              | 29-30             | 0.61                        | 45                                 | 0.74                  | 0.12                    | 0.82                        |

*Continued on next page*



Table S2 – Continued from previous page

| <b>Fault No</b> | <b>Sample Bin</b> | <b>Fault Detection Rate</b> | <b>Optimal Feature Subset Size</b> | <b>Model Accuracy</b> | <b>False Alarm Rate</b> | <b>Area Under the Curve</b> |
|-----------------|-------------------|-----------------------------|------------------------------------|-----------------------|-------------------------|-----------------------------|
| 10              | 30-31             | 0.63                        | 41                                 | 0.75                  | 0.13                    | 0.82                        |
| 10              | 31-32             | 0.47                        | 77                                 | 0.72                  | 0.04                    | 0.82                        |
| 10              | 32-33             | 0.62                        | 50                                 | 0.73                  | 0.16                    | 0.81                        |
| 10              | 33-34             | 0.62                        | 28                                 | 0.72                  | 0.17                    | 0.81                        |
| 10              | 34-35             | 0.45                        | 65                                 | 0.70                  | 0.05                    | 0.78                        |
| 10              | 35-36             | 0.52                        | 92                                 | 0.71                  | 0.09                    | 0.80                        |
| 10              | 36-37             | 0.68                        | 104                                | 0.75                  | 0.19                    | 0.82                        |
| 10              | 37-38             | 0.61                        | 56                                 | 0.72                  | 0.17                    | 0.80                        |
| 10              | 38-39             | 0.64                        | 54                                 | 0.73                  | 0.18                    | 0.81                        |
| 10              | 39-40             | 0.53                        | 48                                 | 0.71                  | 0.11                    | 0.79                        |
| 10              | 40-41             | 0.55                        | 63                                 | 0.71                  | 0.13                    | 0.77                        |
| 10              | 41-42             | 0.53                        | 24                                 | 0.70                  | 0.14                    | 0.76                        |
| 10              | 42-43             | 0.51                        | 40                                 | 0.69                  | 0.13                    | 0.76                        |
| 10              | 43-44             | 0.51                        | 47                                 | 0.68                  | 0.14                    | 0.76                        |
| 10              | 44-45             | 0.73                        | 94                                 | 0.71                  | 0.30                    | 0.79                        |
| 10              | 45-46             | 0.92                        | 1                                  | 0.76                  | 0.40                    | 0.94                        |
| 10              | 46-47             | 0.91                        | 6                                  | 0.81                  | 0.30                    | 0.91                        |
| 10              | 47-48             | 0.88                        | 8                                  | 0.84                  | 0.20                    | 0.92                        |
| 10              | 48-49             | 0.90                        | 38                                 | 0.88                  | 0.15                    | 0.94                        |
| 10              | 49-50             | 0.90                        | 55                                 | 0.90                  | 0.11                    | 0.95                        |
| 10              | 50-51             | 0.91                        | 46                                 | 0.91                  | 0.08                    | 0.97                        |
| 10              | 51-52             | 0.92                        | 52                                 | 0.93                  | 0.07                    | 0.97                        |
| 10              | 52-53             | 0.92                        | 35                                 | 0.93                  | 0.06                    | 0.97                        |
| 10              | 53-54             | 0.91                        | 37                                 | 0.93                  | 0.04                    | 0.98                        |
| 10              | 54-55             | 0.92                        | 24                                 | 0.94                  | 0.03                    | 0.98                        |
| 10              | 55-56             | 0.92                        | 10                                 | 0.94                  | 0.04                    | 0.99                        |

*Continued on next page*

Table S2 – Continued from previous page

| <b>Fault No</b> | <b>Sample Bin</b> | <b>Fault Detection Rate</b> | <b>Optimal Feature Subset Size</b> | <b>Model Accuracy</b> | <b>False Alarm Rate</b> | <b>Area Under the Curve</b> |
|-----------------|-------------------|-----------------------------|------------------------------------|-----------------------|-------------------------|-----------------------------|
| 10              | 56-57             | 0.94                        | 10                                 | 0.96                  | 0.02                    | 0.99                        |
| 10              | 57-58             | 0.90                        | 5                                  | 0.94                  | 0.01                    | 0.99                        |
| 10              | 58-59             | 0.94                        | 17                                 | 0.96                  | 0.01                    | 0.99                        |
| 10              | 59-60             | 0.94                        | 83                                 | 0.96                  | 0.01                    | 0.99                        |
| 10              | 60-61             | 0.95                        | 75                                 | 0.97                  | 0.02                    | 1.00                        |
| 10              | 61-62             | 0.97                        | 12                                 | 0.97                  | 0.02                    | 1.00                        |
| 10              | 62-63             | 0.97                        | 11                                 | 0.97                  | 0.02                    | 1.00                        |
| 10              | 63-64             | 0.96                        | 38                                 | 0.98                  | 0.00                    | 1.00                        |
| 10              | 64-65             | 0.96                        | 18                                 | 0.98                  | 0.00                    | 1.00                        |
| 10              | 65-66             | 0.96                        | 89                                 | 0.98                  | 0.01                    | 1.00                        |
| 10              | 66-67             | 0.97                        | 11                                 | 0.98                  | 0.01                    | 1.00                        |
| 10              | 67-68             | 0.98                        | 25                                 | 0.99                  | 0.01                    | 1.00                        |
| 10              | 68-69             | 0.98                        | 16                                 | 0.99                  | 0.00                    | 1.00                        |
| 10              | 69-70             | 0.97                        | 14                                 | 0.98                  | 0.01                    | 1.00                        |
| 10              | 70-71             | 0.98                        | 15                                 | 0.98                  | 0.01                    | 1.00                        |
| 10              | 71-72             | 0.97                        | 12                                 | 0.98                  | 0.01                    | 1.00                        |
| 10              | 72-73             | 0.98                        | 13                                 | 0.99                  | 0.01                    | 1.00                        |
| 10              | 73-74             | 0.97                        | 12                                 | 0.98                  | 0.01                    | 1.00                        |
| 10              | 74-75             | 0.97                        | 13                                 | 0.98                  | 0.01                    | 1.00                        |
| 10              | 75-76             | 0.97                        | 7                                  | 0.98                  | 0.01                    | 1.00                        |
| 10              | 76-77             | 0.98                        | 41                                 | 0.99                  | 0.00                    | 1.00                        |
| 10              | 77-78             | 0.98                        | 7                                  | 0.99                  | 0.00                    | 1.00                        |
| 10              | 78-79             | 0.99                        | 8                                  | 0.99                  | 0.01                    | 1.00                        |
| 10              | 79-80             | 0.97                        | 7                                  | 0.98                  | 0.01                    | 1.00                        |
| 10              | 80-81             | 0.98                        | 6                                  | 0.99                  | 0.01                    | 1.00                        |
| 10              | 81-82             | 0.99                        | 10                                 | 0.99                  | 0.01                    | 1.00                        |

*Continued on next page*

Table S2 – *Continued from previous page*

| <b>Fault No</b> | <b>Sample Bin</b> | <b>Fault Detection Rate</b> | <b>Optimal Feature Subset Size</b> | <b>Model Accuracy</b> | <b>False Alarm Rate</b> | <b>Area Under the Curve</b> |
|-----------------|-------------------|-----------------------------|------------------------------------|-----------------------|-------------------------|-----------------------------|
| 10              | 82-83             | 0.97                        | 7                                  | 0.98                  | 0.00                    | 1.00                        |
| 10              | 83-84             | 0.97                        | 9                                  | 0.98                  | 0.00                    | 1.00                        |
| 10              | 84-85             | 0.98                        | 11                                 | 0.99                  | 0.00                    | 1.00                        |
| 10              | 85-86             | 0.98                        | 11                                 | 0.98                  | 0.01                    | 1.00                        |
| 10              | 86-87             | 0.98                        | 7                                  | 0.99                  | 0.00                    | 1.00                        |
| 10              | 87-88             | 0.98                        | 9                                  | 0.99                  | 0.01                    | 1.00                        |
| 10              | 88-89             | 0.98                        | 10                                 | 0.99                  | 0.00                    | 1.00                        |
| 10              | 89-90             | 0.98                        | 13                                 | 0.99                  | 0.00                    | 1.00                        |
| 10              | 90-91             | 0.97                        | 8                                  | 0.98                  | 0.00                    | 1.00                        |
| 10              | 91-92             | 0.98                        | 10                                 | 0.98                  | 0.01                    | 1.00                        |
| 10              | 92-93             | 0.96                        | 11                                 | 0.98                  | 0.00                    | 1.00                        |
| 10              | 93-94             | 0.98                        | 11                                 | 0.99                  | 0.00                    | 1.00                        |
| 10              | 94-95             | 0.97                        | 11                                 | 0.99                  | 0.00                    | 1.00                        |
| 10              | 95-96             | 0.98                        | 9                                  | 0.99                  | 0.01                    | 1.00                        |
| 10              | 96-97             | 0.98                        | 7                                  | 0.99                  | 0.01                    | 1.00                        |
| 10              | 97-98             | 0.97                        | 8                                  | 0.98                  | 0.00                    | 1.00                        |
| 10              | 98-99             | 0.98                        | 13                                 | 0.99                  | 0.00                    | 1.00                        |
| 10              | 99-100            | 0.98                        | 7                                  | 0.98                  | 0.01                    | 1.00                        |
| 10              | 100-101           | 0.98                        | 8                                  | 0.99                  | 0.00                    | 1.00                        |
| 10              | 101-102           | 0.98                        | 8                                  | 0.99                  | 0.00                    | 1.00                        |
| 10              | 102-103           | 0.98                        | 11                                 | 0.99                  | 0.00                    | 1.00                        |
| 10              | 103-104           | 0.98                        | 15                                 | 0.99                  | 0.00                    | 1.00                        |
| 10              | 104-105           | 0.97                        | 7                                  | 0.98                  | 0.01                    | 1.00                        |
| 10              | 105-106           | 0.97                        | 6                                  | 0.98                  | 0.01                    | 1.00                        |
| 10              | 106-107           | 0.98                        | 6                                  | 0.98                  | 0.01                    | 1.00                        |
| 10              | 107-108           | 0.98                        | 12                                 | 0.99                  | 0.00                    | 1.00                        |

*Continued on next page*

Table S2 – Continued from previous page

| <b>Fault No</b> | <b>Sample Bin</b> | <b>Fault Detection Rate</b> | <b>Optimal Feature Subset Size</b> | <b>Model Accuracy</b> | <b>False Alarm Rate</b> | <b>Area Under the Curve</b> |
|-----------------|-------------------|-----------------------------|------------------------------------|-----------------------|-------------------------|-----------------------------|
| 10              | 108-109           | 0.98                        | 9                                  | 0.99                  | 0.00                    | 1.00                        |
| 10              | 109-110           | 0.98                        | 13                                 | 0.99                  | 0.01                    | 1.00                        |
| 10              | 110-111           | 0.98                        | 13                                 | 0.99                  | 0.01                    | 1.00                        |
| 10              | 111-112           | 0.98                        | 10                                 | 0.99                  | 0.00                    | 1.00                        |
| 10              | 112-113           | 0.98                        | 13                                 | 0.99                  | 0.00                    | 1.00                        |
| 10              | 113-114           | 0.99                        | 7                                  | 0.99                  | 0.01                    | 1.00                        |
| 10              | 114-115           | 0.98                        | 12                                 | 0.99                  | 0.00                    | 1.00                        |
| 10              | 115-116           | 0.98                        | 10                                 | 0.99                  | 0.01                    | 1.00                        |
| 10              | 116-117           | 0.99                        | 14                                 | 0.99                  | 0.00                    | 1.00                        |
| 10              | 117-118           | 0.99                        | 11                                 | 0.99                  | 0.00                    | 1.00                        |
| 10              | 118-119           | 0.99                        | 13                                 | 0.99                  | 0.00                    | 1.00                        |
| 10              | 119-120           | 0.99                        | 16                                 | 0.99                  | 0.00                    | 1.00                        |
| 11              | 2-3               | 0.96                        | 21                                 | 0.98                  | 0.00                    | 1.00                        |
| 11              | 3-4               | 0.89                        | 22                                 | 0.94                  | 0.01                    | 0.98                        |
| 11              | 4-5               | 0.89                        | 56                                 | 0.93                  | 0.02                    | 0.99                        |
| 11              | 5-6               | 0.88                        | 48                                 | 0.91                  | 0.07                    | 0.96                        |
| 11              | 6-7               | 0.86                        | 4                                  | 0.91                  | 0.04                    | 0.97                        |
| 11              | 7-8               | 0.79                        | 10                                 | 0.86                  | 0.08                    | 0.92                        |
| 11              | 8-9               | 0.75                        | 20                                 | 0.83                  | 0.10                    | 0.88                        |
| 11              | 9-10              | 0.75                        | 218                                | 0.72                  | 0.30                    | 0.80                        |
| 11              | 10-11             | 0.77                        | 44                                 | 0.85                  | 0.08                    | 0.93                        |
| 11              | 11-12             | 0.66                        | 25                                 | 0.80                  | 0.06                    | 0.90                        |
| 11              | 12-13             | 0.74                        | 13                                 | 0.82                  | 0.10                    | 0.88                        |
| 11              | 13-14             | 0.69                        | 25                                 | 0.78                  | 0.13                    | 0.86                        |
| 11              | 14-15             | 0.67                        | 47                                 | 0.74                  | 0.19                    | 0.83                        |
| 11              | 15-16             | 0.71                        | 79                                 | 0.74                  | 0.22                    | 0.83                        |

*Continued on next page*

Table S2 – *Continued from previous page*

| <b>Fault No</b> | <b>Sample Bin</b> | <b>Fault Detection Rate</b> | <b>Optimal Feature Subset Size</b> | <b>Model Accuracy</b> | <b>False Alarm Rate</b> | <b>Area Under the Curve</b> |
|-----------------|-------------------|-----------------------------|------------------------------------|-----------------------|-------------------------|-----------------------------|
| 11              | 16-17             | 0.60                        | 38                                 | 0.70                  | 0.19                    | 0.77                        |
| 11              | 17-18             | 0.64                        | 37                                 | 0.69                  | 0.27                    | 0.75                        |
| 11              | 18-19             | 0.63                        | 13                                 | 0.66                  | 0.31                    | 0.73                        |
| 11              | 19-20             | 0.35                        | 18                                 | 0.62                  | 0.12                    | 0.70                        |
| 11              | 20-21             | 0.56                        | 46                                 | 0.66                  | 0.23                    | 0.73                        |
| 11              | 21-22             | 0.60                        | 18                                 | 0.66                  | 0.27                    | 0.73                        |
| 11              | 22-23             | 0.63                        | 60                                 | 0.65                  | 0.33                    | 0.72                        |
| 11              | 23-24             | 0.59                        | 47                                 | 0.66                  | 0.26                    | 0.74                        |
| 11              | 24-25             | 0.54                        | 32                                 | 0.63                  | 0.28                    | 0.70                        |
| 11              | 25-26             | 0.60                        | 16                                 | 0.66                  | 0.28                    | 0.73                        |
| 11              | 26-27             | 0.70                        | 47                                 | 0.70                  | 0.31                    | 0.77                        |
| 11              | 27-28             | 0.70                        | 67                                 | 0.70                  | 0.31                    | 0.76                        |
| 11              | 28-29             | 0.62                        | 31                                 | 0.67                  | 0.27                    | 0.74                        |
| 11              | 29-30             | 0.68                        | 63                                 | 0.70                  | 0.27                    | 0.77                        |
| 11              | 30-31             | 0.86                        | 224                                | 0.56                  | 0.73                    | 0.59                        |
| 11              | 31-32             | 0.68                        | 95                                 | 0.66                  | 0.35                    | 0.74                        |
| 11              | 32-33             | 0.67                        | 55                                 | 0.70                  | 0.28                    | 0.77                        |
| 11              | 33-34             | 1.00                        | 112                                | 0.50                  | 0.99                    | 0.56                        |
| 11              | 34-35             | 0.67                        | 189                                | 0.64                  | 0.39                    | 0.71                        |
| 11              | 35-36             | 0.63                        | 151                                | 0.69                  | 0.26                    | 0.74                        |
| 11              | 36-37             | 0.64                        | 97                                 | 0.72                  | 0.21                    | 0.78                        |
| 11              | 37-38             | 0.70                        | 80                                 | 0.73                  | 0.24                    | 0.80                        |
| 11              | 38-39             | 0.65                        | 116                                | 0.73                  | 0.19                    | 0.80                        |
| 11              | 39-40             | 0.67                        | 110                                | 0.72                  | 0.23                    | 0.81                        |
| 11              | 40-41             | 0.70                        | 74                                 | 0.73                  | 0.25                    | 0.81                        |
| 11              | 41-42             | 0.67                        | 52                                 | 0.69                  | 0.30                    | 0.76                        |

*Continued on next page*

Table S2 – Continued from previous page

| <b>Fault No</b> | <b>Sample Bin</b> | <b>Fault Detection Rate</b> | <b>Optimal Feature Subset Size</b> | <b>Model Accuracy</b> | <b>False Alarm Rate</b> | <b>Area Under the Curve</b> |
|-----------------|-------------------|-----------------------------|------------------------------------|-----------------------|-------------------------|-----------------------------|
| 11              | 42-43             | 0.63                        | 39                                 | 0.71                  | 0.21                    | 0.79                        |
| 11              | 43-44             | 0.61                        | 66                                 | 0.72                  | 0.16                    | 0.80                        |
| 11              | 44-45             | 0.60                        | 93                                 | 0.73                  | 0.13                    | 0.80                        |
| 11              | 45-46             | 0.61                        | 55                                 | 0.73                  | 0.15                    | 0.80                        |
| 11              | 46-47             | 0.62                        | 25                                 | 0.73                  | 0.17                    | 0.79                        |
| 11              | 47-48             | 0.61                        | 95                                 | 0.71                  | 0.18                    | 0.79                        |
| 11              | 48-49             | 0.59                        | 66                                 | 0.72                  | 0.15                    | 0.79                        |
| 11              | 49-50             | 0.58                        | 94                                 | 0.71                  | 0.17                    | 0.77                        |
| 11              | 50-51             | 0.60                        | 56                                 | 0.73                  | 0.15                    | 0.80                        |
| 11              | 51-52             | 0.62                        | 39                                 | 0.74                  | 0.15                    | 0.80                        |
| 11              | 52-53             | 0.58                        | 47                                 | 0.71                  | 0.16                    | 0.77                        |
| 11              | 53-54             | 0.61                        | 84                                 | 0.72                  | 0.16                    | 0.80                        |
| 11              | 54-55             | 0.68                        | 72                                 | 0.73                  | 0.21                    | 0.81                        |
| 11              | 55-56             | 0.58                        | 50                                 | 0.72                  | 0.14                    | 0.79                        |
| 11              | 56-57             | 0.61                        | 38                                 | 0.73                  | 0.16                    | 0.80                        |
| 11              | 57-58             | 0.59                        | 45                                 | 0.71                  | 0.17                    | 0.79                        |
| 11              | 58-59             | 0.60                        | 36                                 | 0.73                  | 0.14                    | 0.80                        |
| 11              | 59-60             | 0.59                        | 20                                 | 0.72                  | 0.14                    | 0.79                        |
| 11              | 60-61             | 0.59                        | 36                                 | 0.73                  | 0.14                    | 0.80                        |
| 11              | 61-62             | 0.60                        | 26                                 | 0.72                  | 0.16                    | 0.79                        |
| 11              | 62-63             | 0.60                        | 2                                  | 0.75                  | 0.10                    | 0.82                        |
| 11              | 63-64             | 0.61                        | 14                                 | 0.73                  | 0.15                    | 0.81                        |
| 11              | 64-65             | 0.60                        | 2                                  | 0.76                  | 0.08                    | 0.81                        |
| 11              | 65-66             | 0.61                        | 2                                  | 0.76                  | 0.09                    | 0.82                        |
| 11              | 66-67             | 0.64                        | 2                                  | 0.77                  | 0.10                    | 0.83                        |
| 11              | 67-68             | 0.64                        | 2                                  | 0.77                  | 0.09                    | 0.83                        |

*Continued on next page*

Table S2 – Continued from previous page

| <b>Fault No</b> | <b>Sample Bin</b> | <b>Fault Detection Rate</b> | <b>Optimal Feature Subset Size</b> | <b>Model Accuracy</b> | <b>False Alarm Rate</b> | <b>Area Under the Curve</b> |
|-----------------|-------------------|-----------------------------|------------------------------------|-----------------------|-------------------------|-----------------------------|
| 11              | 68-69             | 0.64                        | 2                                  | 0.78                  | 0.09                    | 0.84                        |
| 11              | 69-70             | 0.64                        | 2                                  | 0.77                  | 0.10                    | 0.83                        |
| 11              | 70-71             | 0.68                        | 2                                  | 0.80                  | 0.08                    | 0.85                        |
| 11              | 71-72             | 0.67                        | 2                                  | 0.80                  | 0.08                    | 0.85                        |
| 11              | 72-73             | 0.60                        | 2                                  | 0.77                  | 0.05                    | 0.86                        |
| 11              | 73-74             | 0.66                        | 2                                  | 0.78                  | 0.10                    | 0.85                        |
| 11              | 74-75             | 0.66                        | 2                                  | 0.79                  | 0.09                    | 0.86                        |
| 11              | 75-76             | 0.66                        | 2                                  | 0.80                  | 0.06                    | 0.87                        |
| 11              | 76-77             | 0.71                        | 2                                  | 0.81                  | 0.08                    | 0.88                        |
| 11              | 77-78             | 0.69                        | 2                                  | 0.81                  | 0.07                    | 0.87                        |
| 11              | 78-79             | 0.67                        | 2                                  | 0.81                  | 0.05                    | 0.86                        |
| 11              | 79-80             | 0.67                        | 2                                  | 0.79                  | 0.08                    | 0.86                        |
| 11              | 80-81             | 0.68                        | 2                                  | 0.81                  | 0.06                    | 0.88                        |
| 11              | 81-82             | 0.68                        | 2                                  | 0.81                  | 0.06                    | 0.89                        |
| 11              | 82-83             | 0.70                        | 2                                  | 0.83                  | 0.05                    | 0.89                        |
| 11              | 83-84             | 0.66                        | 2                                  | 0.80                  | 0.07                    | 0.87                        |
| 11              | 84-85             | 0.67                        | 2                                  | 0.80                  | 0.06                    | 0.87                        |
| 11              | 85-86             | 0.71                        | 2                                  | 0.82                  | 0.07                    | 0.88                        |
| 11              | 86-87             | 0.67                        | 2                                  | 0.80                  | 0.06                    | 0.87                        |
| 11              | 87-88             | 0.69                        | 2                                  | 0.81                  | 0.06                    | 0.87                        |
| 11              | 88-89             | 0.70                        | 2                                  | 0.82                  | 0.07                    | 0.89                        |
| 11              | 89-90             | 0.65                        | 2                                  | 0.80                  | 0.04                    | 0.88                        |
| 11              | 90-91             | 0.68                        | 2                                  | 0.80                  | 0.08                    | 0.87                        |
| 11              | 91-92             | 0.68                        | 2                                  | 0.81                  | 0.07                    | 0.88                        |
| 11              | 92-93             | 0.68                        | 2                                  | 0.80                  | 0.08                    | 0.87                        |
| 11              | 93-94             | 0.68                        | 2                                  | 0.80                  | 0.09                    | 0.87                        |

*Continued on next page*

Table S2 – Continued from previous page

| <b>Fault No</b> | <b>Sample Bin</b> | <b>Fault Detection Rate</b> | <b>Optimal Feature Subset Size</b> | <b>Model Accuracy</b> | <b>False Alarm Rate</b> | <b>Area Under the Curve</b> |
|-----------------|-------------------|-----------------------------|------------------------------------|-----------------------|-------------------------|-----------------------------|
| 11              | 94-95             | 0.70                        | 2                                  | 0.82                  | 0.07                    | 0.89                        |
| 11              | 95-96             | 0.68                        | 2                                  | 0.81                  | 0.06                    | 0.88                        |
| 11              | 96-97             | 0.70                        | 2                                  | 0.82                  | 0.06                    | 0.89                        |
| 11              | 97-98             | 0.68                        | 2                                  | 0.80                  | 0.07                    | 0.88                        |
| 11              | 98-99             | 0.69                        | 2                                  | 0.81                  | 0.07                    | 0.88                        |
| 11              | 99-100            | 0.70                        | 2                                  | 0.81                  | 0.07                    | 0.88                        |
| 11              | 100-101           | 0.67                        | 2                                  | 0.80                  | 0.06                    | 0.88                        |
| 11              | 101-102           | 0.69                        | 2                                  | 0.81                  | 0.07                    | 0.88                        |
| 11              | 102-103           | 0.69                        | 2                                  | 0.82                  | 0.05                    | 0.88                        |
| 11              | 103-104           | 0.68                        | 2                                  | 0.82                  | 0.05                    | 0.87                        |
| 11              | 104-105           | 0.71                        | 2                                  | 0.82                  | 0.08                    | 0.88                        |
| 11              | 105-106           | 0.71                        | 2                                  | 0.82                  | 0.07                    | 0.89                        |
| 11              | 106-107           | 0.71                        | 2                                  | 0.82                  | 0.06                    | 0.88                        |
| 11              | 107-108           | 0.68                        | 2                                  | 0.81                  | 0.07                    | 0.88                        |
| 11              | 108-109           | 0.67                        | 2                                  | 0.80                  | 0.07                    | 0.87                        |
| 11              | 109-110           | 0.67                        | 2                                  | 0.80                  | 0.07                    | 0.87                        |
| 11              | 110-111           | 0.70                        | 2                                  | 0.82                  | 0.06                    | 0.88                        |
| 11              | 111-112           | 0.71                        | 2                                  | 0.83                  | 0.05                    | 0.89                        |
| 11              | 112-113           | 0.69                        | 2                                  | 0.82                  | 0.06                    | 0.88                        |
| 11              | 113-114           | 0.65                        | 2                                  | 0.80                  | 0.04                    | 0.88                        |
| 11              | 114-115           | 0.66                        | 2                                  | 0.81                  | 0.04                    | 0.89                        |
| 11              | 115-116           | 0.71                        | 2                                  | 0.82                  | 0.06                    | 0.90                        |
| 11              | 116-117           | 0.68                        | 2                                  | 0.80                  | 0.08                    | 0.89                        |
| 11              | 117-118           | 0.70                        | 2                                  | 0.81                  | 0.08                    | 0.88                        |
| 11              | 118-119           | 0.70                        | 2                                  | 0.81                  | 0.07                    | 0.88                        |
| 11              | 119-120           | 0.64                        | 2                                  | 0.81                  | 0.02                    | 0.88                        |

*Continued on next page*



Table S2 – Continued from previous page

| <b>Fault No</b> | <b>Sample Bin</b> | <b>Fault Detection Rate</b> | <b>Optimal Feature Subset Size</b> | <b>Model Accuracy</b> | <b>False Alarm Rate</b> | <b>Area Under the Curve</b> |
|-----------------|-------------------|-----------------------------|------------------------------------|-----------------------|-------------------------|-----------------------------|
| 12              | 2-3               | 0.73                        | 12                                 | 0.83                  | 0.06                    | 0.90                        |
| 12              | 3-4               | 0.86                        | 78                                 | 0.91                  | 0.05                    | 0.97                        |
| 12              | 4-5               | 0.89                        | 51                                 | 0.91                  | 0.06                    | 0.97                        |
| 12              | 5-6               | 0.87                        | 48                                 | 0.91                  | 0.06                    | 0.96                        |
| 12              | 6-7               | 0.77                        | 42                                 | 0.85                  | 0.08                    | 0.93                        |
| 12              | 7-8               | 0.75                        | 33                                 | 0.84                  | 0.07                    | 0.92                        |
| 12              | 8-9               | 0.75                        | 62                                 | 0.81                  | 0.13                    | 0.89                        |
| 12              | 9-10              | 0.70                        | 90                                 | 0.79                  | 0.13                    | 0.87                        |
| 12              | 10-11             | 0.67                        | 26                                 | 0.81                  | 0.05                    | 0.88                        |
| 12              | 11-12             | 0.63                        | 29                                 | 0.76                  | 0.11                    | 0.81                        |
| 12              | 12-13             | 0.67                        | 80                                 | 0.79                  | 0.09                    | 0.86                        |
| 12              | 13-14             | 0.67                        | 84                                 | 0.78                  | 0.10                    | 0.86                        |
| 12              | 14-15             | 0.53                        | 65                                 | 0.74                  | 0.05                    | 0.81                        |
| 12              | 15-16             | 0.60                        | 15                                 | 0.74                  | 0.11                    | 0.79                        |
| 12              | 16-17             | 0.60                        | 30                                 | 0.76                  | 0.08                    | 0.82                        |
| 12              | 17-18             | 0.59                        | 42                                 | 0.75                  | 0.08                    | 0.83                        |
| 12              | 18-19             | 0.57                        | 35                                 | 0.74                  | 0.08                    | 0.83                        |
| 12              | 19-20             | 0.49                        | 11                                 | 0.74                  | 0.02                    | 0.78                        |
| 12              | 20-21             | 0.51                        | 4                                  | 0.75                  | 0.00                    | 0.83                        |
| 12              | 21-22             | 0.57                        | 53                                 | 0.74                  | 0.09                    | 0.82                        |
| 12              | 22-23             | 0.57                        | 79                                 | 0.73                  | 0.11                    | 0.81                        |
| 12              | 23-24             | 0.61                        | 91                                 | 0.74                  | 0.12                    | 0.83                        |
| 12              | 24-25             | 0.59                        | 85                                 | 0.74                  | 0.10                    | 0.82                        |
| 12              | 25-26             | 0.63                        | 95                                 | 0.75                  | 0.13                    | 0.83                        |
| 12              | 26-27             | 0.62                        | 49                                 | 0.76                  | 0.10                    | 0.84                        |
| 12              | 27-28             | 0.58                        | 62                                 | 0.75                  | 0.09                    | 0.83                        |

*Continued on next page*

Table S2 – *Continued from previous page*

| <b>Fault No</b> | <b>Sample Bin</b> | <b>Fault Detection Rate</b> | <b>Optimal Feature Subset Size</b> | <b>Model Accuracy</b> | <b>False Alarm Rate</b> | <b>Area Under the Curve</b> |
|-----------------|-------------------|-----------------------------|------------------------------------|-----------------------|-------------------------|-----------------------------|
| 12              | 28-29             | 0.60                        | 80                                 | 0.75                  | 0.10                    | 0.83                        |
| 12              | 29-30             | 0.63                        | 100                                | 0.76                  | 0.11                    | 0.84                        |
| 12              | 30-31             | 0.63                        | 66                                 | 0.76                  | 0.10                    | 0.85                        |
| 12              | 31-32             | 0.60                        | 45                                 | 0.78                  | 0.05                    | 0.85                        |
| 12              | 32-33             | 0.60                        | 44                                 | 0.76                  | 0.08                    | 0.85                        |
| 12              | 33-34             | 0.55                        | 7                                  | 0.77                  | 0.00                    | 0.92                        |
| 12              | 34-35             | 0.59                        | 57                                 | 0.77                  | 0.04                    | 0.86                        |
| 12              | 35-36             | 0.58                        | 10                                 | 0.79                  | 0.00                    | 0.95                        |
| 12              | 36-37             | 0.65                        | 9                                  | 0.83                  | 0.00                    | 0.96                        |
| 12              | 37-38             | 0.74                        | 11                                 | 0.87                  | 0.00                    | 0.96                        |
| 12              | 38-39             | 0.66                        | 2                                  | 0.83                  | 0.00                    | 0.94                        |
| 12              | 39-40             | 0.68                        | 5                                  | 0.84                  | 0.00                    | 0.95                        |
| 12              | 40-41             | 0.77                        | 11                                 | 0.89                  | 0.00                    | 0.96                        |
| 12              | 41-42             | 0.71                        | 4                                  | 0.86                  | 0.00                    | 0.95                        |
| 12              | 42-43             | 0.71                        | 2                                  | 0.85                  | 0.00                    | 0.95                        |
| 12              | 43-44             | 0.75                        | 7                                  | 0.87                  | 0.00                    | 0.96                        |
| 12              | 44-45             | 0.81                        | 10                                 | 0.91                  | 0.00                    | 0.97                        |
| 12              | 45-46             | 0.82                        | 7                                  | 0.91                  | 0.00                    | 0.97                        |
| 12              | 46-47             | 0.75                        | 7                                  | 0.88                  | 0.00                    | 0.97                        |
| 12              | 47-48             | 0.77                        | 9                                  | 0.89                  | 0.00                    | 0.97                        |
| 12              | 48-49             | 0.78                        | 5                                  | 0.89                  | 0.00                    | 0.97                        |
| 12              | 49-50             | 0.84                        | 17                                 | 0.92                  | 0.00                    | 0.98                        |
| 12              | 50-51             | 0.85                        | 5                                  | 0.93                  | 0.00                    | 0.97                        |
| 12              | 51-52             | 0.87                        | 12                                 | 0.93                  | 0.00                    | 0.98                        |
| 12              | 52-53             | 0.84                        | 13                                 | 0.92                  | 0.00                    | 0.98                        |
| 12              | 53-54             | 0.85                        | 2                                  | 0.92                  | 0.00                    | 0.97                        |

*Continued on next page*

Table S2 – Continued from previous page

| <b>Fault No</b> | <b>Sample Bin</b> | <b>Fault Detection Rate</b> | <b>Optimal Feature Subset Size</b> | <b>Model Accuracy</b> | <b>False Alarm Rate</b> | <b>Area Under the Curve</b> |
|-----------------|-------------------|-----------------------------|------------------------------------|-----------------------|-------------------------|-----------------------------|
| 12              | 54-55             | 0.86                        | 7                                  | 0.93                  | 0.00                    | 0.98                        |
| 12              | 55-56             | 0.86                        | 4                                  | 0.93                  | 0.00                    | 0.97                        |
| 12              | 56-57             | 0.85                        | 5                                  | 0.93                  | 0.00                    | 0.97                        |
| 12              | 57-58             | 0.86                        | 4                                  | 0.93                  | 0.00                    | 0.98                        |
| 12              | 58-59             | 0.85                        | 3                                  | 0.92                  | 0.00                    | 0.98                        |
| 12              | 59-60             | 0.85                        | 2                                  | 0.93                  | 0.00                    | 0.98                        |
| 12              | 60-61             | 0.86                        | 1                                  | 0.93                  | 0.00                    | 0.99                        |
| 12              | 61-62             | 0.86                        | 3                                  | 0.93                  | 0.00                    | 0.98                        |
| 12              | 62-63             | 0.89                        | 6                                  | 0.94                  | 0.00                    | 0.99                        |
| 12              | 63-64             | 0.88                        | 5                                  | 0.94                  | 0.00                    | 0.99                        |
| 12              | 64-65             | 0.91                        | 11                                 | 0.95                  | 0.00                    | 0.99                        |
| 12              | 65-66             | 0.90                        | 9                                  | 0.95                  | 0.00                    | 0.99                        |
| 12              | 66-67             | 0.90                        | 17                                 | 0.95                  | 0.00                    | 0.99                        |
| 12              | 67-68             | 0.90                        | 14                                 | 0.95                  | 0.00                    | 0.99                        |
| 12              | 68-69             | 0.88                        | 7                                  | 0.94                  | 0.00                    | 0.99                        |
| 12              | 69-70             | 0.88                        | 11                                 | 0.94                  | 0.00                    | 0.99                        |
| 12              | 70-71             | 0.88                        | 6                                  | 0.94                  | 0.00                    | 0.99                        |
| 12              | 71-72             | 0.89                        | 5                                  | 0.94                  | 0.00                    | 0.99                        |
| 12              | 72-73             | 0.91                        | 6                                  | 0.95                  | 0.00                    | 0.99                        |
| 12              | 73-74             | 0.91                        | 10                                 | 0.95                  | 0.00                    | 1.00                        |
| 12              | 74-75             | 0.91                        | 7                                  | 0.95                  | 0.00                    | 1.00                        |
| 12              | 75-76             | 0.93                        | 7                                  | 0.97                  | 0.00                    | 0.99                        |
| 12              | 76-77             | 0.93                        | 8                                  | 0.96                  | 0.00                    | 0.99                        |
| 12              | 77-78             | 0.93                        | 6                                  | 0.96                  | 0.00                    | 0.99                        |
| 12              | 78-79             | 0.90                        | 4                                  | 0.95                  | 0.00                    | 0.99                        |
| 12              | 79-80             | 0.93                        | 6                                  | 0.97                  | 0.00                    | 0.99                        |

*Continued on next page*

Table S2 – *Continued from previous page*

| <b>Fault No</b> | <b>Sample Bin</b> | <b>Fault Detection Rate</b> | <b>Optimal Feature Subset Size</b> | <b>Model Accuracy</b> | <b>False Alarm Rate</b> | <b>Area Under the Curve</b> |
|-----------------|-------------------|-----------------------------|------------------------------------|-----------------------|-------------------------|-----------------------------|
| 12              | 80-81             | 0.94                        | 9                                  | 0.97                  | 0.00                    | 0.99                        |
| 12              | 81-82             | 0.93                        | 15                                 | 0.96                  | 0.00                    | 1.00                        |
| 12              | 82-83             | 0.93                        | 1                                  | 0.97                  | 0.00                    | 1.00                        |
| 12              | 83-84             | 0.92                        | 11                                 | 0.96                  | 0.00                    | 0.99                        |
| 12              | 84-85             | 0.93                        | 17                                 | 0.97                  | 0.00                    | 1.00                        |
| 12              | 85-86             | 0.93                        | 13                                 | 0.97                  | 0.00                    | 1.00                        |
| 12              | 86-87             | 0.93                        | 16                                 | 0.96                  | 0.00                    | 1.00                        |
| 12              | 87-88             | 0.93                        | 1                                  | 0.96                  | 0.00                    | 1.00                        |
| 12              | 88-89             | 0.93                        | 3                                  | 0.97                  | 0.00                    | 0.99                        |
| 12              | 89-90             | 0.93                        | 5                                  | 0.96                  | 0.00                    | 0.99                        |
| 12              | 90-91             | 0.93                        | 4                                  | 0.97                  | 0.00                    | 0.99                        |
| 12              | 91-92             | 0.93                        | 9                                  | 0.96                  | 0.00                    | 1.00                        |
| 12              | 92-93             | 0.92                        | 14                                 | 0.96                  | 0.00                    | 1.00                        |
| 12              | 93-94             | 0.94                        | 5                                  | 0.97                  | 0.00                    | 0.99                        |
| 12              | 94-95             | 0.94                        | 7                                  | 0.97                  | 0.00                    | 0.99                        |
| 12              | 95-96             | 0.93                        | 13                                 | 0.96                  | 0.00                    | 1.00                        |
| 12              | 96-97             | 0.93                        | 4                                  | 0.96                  | 0.00                    | 0.99                        |
| 12              | 97-98             | 0.94                        | 12                                 | 0.97                  | 0.00                    | 1.00                        |
| 12              | 98-99             | 0.93                        | 16                                 | 0.97                  | 0.00                    | 1.00                        |
| 12              | 99-100            | 0.93                        | 7                                  | 0.96                  | 0.00                    | 1.00                        |
| 12              | 100-101           | 0.94                        | 7                                  | 0.97                  | 0.00                    | 1.00                        |
| 12              | 101-102           | 0.94                        | 9                                  | 0.97                  | 0.00                    | 1.00                        |
| 12              | 102-103           | 0.94                        | 15                                 | 0.97                  | 0.00                    | 1.00                        |
| 12              | 103-104           | 0.93                        | 8                                  | 0.96                  | 0.00                    | 0.99                        |
| 12              | 104-105           | 0.92                        | 13                                 | 0.96                  | 0.00                    | 1.00                        |
| 12              | 105-106           | 0.94                        | 1                                  | 0.97                  | 0.00                    | 1.00                        |

*Continued on next page*

Table S2 – Continued from previous page

| <b>Fault No</b> | <b>Sample Bin</b> | <b>Fault Detection Rate</b> | <b>Optimal Feature Subset Size</b> | <b>Model Accuracy</b> | <b>False Alarm Rate</b> | <b>Area Under the Curve</b> |
|-----------------|-------------------|-----------------------------|------------------------------------|-----------------------|-------------------------|-----------------------------|
| 12              | 106-107           | 0.93                        | 6                                  | 0.97                  | 0.00                    | 1.00                        |
| 12              | 107-108           | 0.95                        | 6                                  | 0.98                  | 0.00                    | 1.00                        |
| 12              | 108-109           | 0.96                        | 9                                  | 0.98                  | 0.00                    | 1.00                        |
| 12              | 109-110           | 0.94                        | 14                                 | 0.97                  | 0.00                    | 1.00                        |
| 12              | 110-111           | 0.97                        | 14                                 | 0.98                  | 0.00                    | 1.00                        |
| 12              | 111-112           | 0.97                        | 15                                 | 0.98                  | 0.00                    | 1.00                        |
| 12              | 112-113           | 0.97                        | 3                                  | 0.99                  | 0.00                    | 1.00                        |
| 12              | 113-114           | 0.98                        | 15                                 | 0.99                  | 0.00                    | 1.00                        |
| 12              | 114-115           | 0.98                        | 16                                 | 0.99                  | 0.00                    | 1.00                        |
| 12              | 115-116           | 0.97                        | 7                                  | 0.99                  | 0.00                    | 1.00                        |
| 12              | 116-117           | 0.98                        | 9                                  | 0.99                  | 0.00                    | 1.00                        |
| 12              | 117-118           | 0.98                        | 10                                 | 0.99                  | 0.00                    | 1.00                        |
| 12              | 118-119           | 0.98                        | 8                                  | 0.99                  | 0.00                    | 1.00                        |
| 12              | 119-120           | 0.99                        | 9                                  | 1.00                  | 0.00                    | 1.00                        |
| 13              | 2-3               | 0.86                        | 252                                | 0.61                  | 0.65                    | 0.67                        |
| 13              | 3-4               | 0.89                        | 123                                | 0.54                  | 0.80                    | 0.55                        |
| 13              | 4-5               | 0.60                        | 279                                | 0.54                  | 0.53                    | 0.54                        |
| 13              | 5-6               | 0.71                        | 55                                 | 0.68                  | 0.36                    | 0.72                        |
| 13              | 6-7               | 0.57                        | 30                                 | 0.53                  | 0.53                    | 0.64                        |
| 13              | 7-8               | 0.73                        | 21                                 | 0.71                  | 0.31                    | 0.76                        |
| 13              | 8-9               | 0.59                        | 31                                 | 0.50                  | 0.60                    | 0.60                        |
| 13              | 9-10              | 0.79                        | 43                                 | 0.49                  | 0.80                    | 0.50                        |
| 13              | 10-11             | 0.82                        | 9                                  | 0.80                  | 0.23                    | 0.87                        |
| 13              | 11-12             | 0.84                        | 37                                 | 0.83                  | 0.18                    | 0.90                        |
| 13              | 12-13             | 0.81                        | 24                                 | 0.80                  | 0.21                    | 0.89                        |
| 13              | 13-14             | 0.82                        | 21                                 | 0.83                  | 0.16                    | 0.90                        |

*Continued on next page*

Table S2 – *Continued from previous page*

| <b>Fault No</b> | <b>Sample Bin</b> | <b>Fault Detection Rate</b> | <b>Optimal Feature Subset Size</b> | <b>Model Accuracy</b> | <b>False Alarm Rate</b> | <b>Area Under the Curve</b> |
|-----------------|-------------------|-----------------------------|------------------------------------|-----------------------|-------------------------|-----------------------------|
| 13              | 14-15             | 0.81                        | 46                                 | 0.82                  | 0.17                    | 0.90                        |
| 13              | 15-16             | 0.81                        | 25                                 | 0.82                  | 0.17                    | 0.91                        |
| 13              | 16-17             | 0.80                        | 23                                 | 0.83                  | 0.15                    | 0.91                        |
| 13              | 17-18             | 0.82                        | 38                                 | 0.83                  | 0.16                    | 0.90                        |
| 13              | 18-19             | 0.80                        | 56                                 | 0.81                  | 0.19                    | 0.89                        |
| 13              | 19-20             | 0.78                        | 33                                 | 0.79                  | 0.19                    | 0.87                        |
| 13              | 20-21             | 0.77                        | 40                                 | 0.77                  | 0.22                    | 0.87                        |
| 13              | 21-22             | 0.79                        | 27                                 | 0.79                  | 0.20                    | 0.88                        |
| 13              | 22-23             | 0.81                        | 48                                 | 0.82                  | 0.16                    | 0.89                        |
| 13              | 23-24             | 0.76                        | 44                                 | 0.78                  | 0.21                    | 0.86                        |
| 13              | 24-25             | 0.77                        | 46                                 | 0.79                  | 0.18                    | 0.87                        |
| 13              | 25-26             | 0.78                        | 37                                 | 0.81                  | 0.16                    | 0.89                        |
| 13              | 26-27             | 0.77                        | 29                                 | 0.81                  | 0.14                    | 0.88                        |
| 13              | 27-28             | 0.81                        | 47                                 | 0.82                  | 0.16                    | 0.90                        |
| 13              | 28-29             | 0.78                        | 45                                 | 0.81                  | 0.16                    | 0.89                        |
| 13              | 29-30             | 0.75                        | 49                                 | 0.77                  | 0.20                    | 0.85                        |
| 13              | 30-31             | 0.72                        | 48                                 | 0.75                  | 0.22                    | 0.82                        |
| 13              | 31-32             | 0.73                        | 86                                 | 0.77                  | 0.20                    | 0.83                        |
| 13              | 32-33             | 0.77                        | 90                                 | 0.79                  | 0.18                    | 0.87                        |
| 13              | 33-34             | 0.76                        | 41                                 | 0.78                  | 0.20                    | 0.85                        |
| 13              | 34-35             | 0.75                        | 34                                 | 0.78                  | 0.19                    | 0.86                        |
| 13              | 35-36             | 0.76                        | 43                                 | 0.78                  | 0.19                    | 0.86                        |
| 13              | 36-37             | 0.78                        | 63                                 | 0.80                  | 0.17                    | 0.88                        |
| 13              | 37-38             | 0.75                        | 59                                 | 0.82                  | 0.12                    | 0.87                        |
| 13              | 38-39             | 0.74                        | 46                                 | 0.81                  | 0.12                    | 0.86                        |
| 13              | 39-40             | 0.77                        | 71                                 | 0.81                  | 0.15                    | 0.88                        |

*Continued on next page*

Table S2 – Continued from previous page

| <b>Fault No</b> | <b>Sample Bin</b> | <b>Fault Detection Rate</b> | <b>Optimal Feature Subset Size</b> | <b>Model Accuracy</b> | <b>False Alarm Rate</b> | <b>Area Under the Curve</b> |
|-----------------|-------------------|-----------------------------|------------------------------------|-----------------------|-------------------------|-----------------------------|
| 13              | 40-41             | 0.75                        | 153                                | 0.77                  | 0.21                    | 0.83                        |
| 13              | 41-42             | 0.77                        | 57                                 | 0.81                  | 0.15                    | 0.88                        |
| 13              | 42-43             | 0.78                        | 43                                 | 0.79                  | 0.20                    | 0.87                        |
| 13              | 43-44             | 0.79                        | 32                                 | 0.81                  | 0.17                    | 0.88                        |
| 13              | 44-45             | 0.73                        | 26                                 | 0.81                  | 0.12                    | 0.87                        |
| 13              | 45-46             | 0.76                        | 53                                 | 0.80                  | 0.16                    | 0.86                        |
| 13              | 46-47             | 0.77                        | 99                                 | 0.81                  | 0.16                    | 0.87                        |
| 13              | 47-48             | 0.78                        | 27                                 | 0.84                  | 0.09                    | 0.90                        |
| 13              | 48-49             | 0.78                        | 35                                 | 0.82                  | 0.14                    | 0.89                        |
| 13              | 49-50             | 0.73                        | 21                                 | 0.81                  | 0.11                    | 0.87                        |
| 13              | 50-51             | 0.70                        | 38                                 | 0.79                  | 0.13                    | 0.84                        |
| 13              | 51-52             | 0.71                        | 43                                 | 0.79                  | 0.13                    | 0.85                        |
| 13              | 52-53             | 0.72                        | 21                                 | 0.81                  | 0.10                    | 0.87                        |
| 13              | 53-54             | 0.67                        | 25                                 | 0.79                  | 0.08                    | 0.86                        |
| 13              | 54-55             | 0.73                        | 22                                 | 0.80                  | 0.14                    | 0.86                        |
| 13              | 55-56             | 0.74                        | 88                                 | 0.79                  | 0.15                    | 0.86                        |
| 13              | 56-57             | 0.75                        | 6                                  | 0.82                  | 0.11                    | 0.89                        |
| 13              | 57-58             | 0.77                        | 62                                 | 0.80                  | 0.17                    | 0.87                        |
| 13              | 58-59             | 0.76                        | 42                                 | 0.82                  | 0.11                    | 0.88                        |
| 13              | 59-60             | 0.74                        | 43                                 | 0.77                  | 0.20                    | 0.84                        |
| 13              | 60-61             | 0.77                        | 58                                 | 0.79                  | 0.18                    | 0.87                        |
| 13              | 61-62             | 0.76                        | 18                                 | 0.82                  | 0.11                    | 0.89                        |
| 13              | 62-63             | 0.73                        | 86                                 | 0.78                  | 0.16                    | 0.85                        |
| 13              | 63-64             | 0.74                        | 19                                 | 0.82                  | 0.10                    | 0.88                        |
| 13              | 64-65             | 0.72                        | 99                                 | 0.75                  | 0.21                    | 0.83                        |
| 13              | 65-66             | 0.68                        | 53                                 | 0.79                  | 0.10                    | 0.86                        |

*Continued on next page*

Table S2 – *Continued from previous page*

| <b>Fault No</b> | <b>Sample Bin</b> | <b>Fault Detection Rate</b> | <b>Optimal Feature Subset Size</b> | <b>Model Accuracy</b> | <b>False Alarm Rate</b> | <b>Area Under the Curve</b> |
|-----------------|-------------------|-----------------------------|------------------------------------|-----------------------|-------------------------|-----------------------------|
| 13              | 66-67             | 0.67                        | 4                                  | 0.82                  | 0.03                    | 0.88                        |
| 13              | 67-68             | 0.62                        | 4                                  | 0.80                  | 0.02                    | 0.88                        |
| 13              | 68-69             | 0.62                        | 4                                  | 0.81                  | 0.01                    | 0.89                        |
| 13              | 69-70             | 0.63                        | 4                                  | 0.81                  | 0.01                    | 0.89                        |
| 13              | 70-71             | 0.65                        | 4                                  | 0.82                  | 0.01                    | 0.89                        |
| 13              | 71-72             | 0.61                        | 2                                  | 0.80                  | 0.01                    | 0.89                        |
| 13              | 72-73             | 0.57                        | 4                                  | 0.78                  | 0.00                    | 0.89                        |
| 13              | 73-74             | 0.57                        | 119                                | 0.76                  | 0.04                    | 0.83                        |
| 13              | 74-75             | 0.60                        | 3                                  | 0.79                  | 0.03                    | 0.88                        |
| 13              | 75-76             | 0.66                        | 3                                  | 0.81                  | 0.03                    | 0.88                        |
| 13              | 76-77             | 0.66                        | 4                                  | 0.82                  | 0.03                    | 0.89                        |
| 13              | 77-78             | 0.66                        | 4                                  | 0.82                  | 0.01                    | 0.89                        |
| 13              | 78-79             | 0.62                        | 4                                  | 0.80                  | 0.01                    | 0.90                        |
| 13              | 79-80             | 0.62                        | 4                                  | 0.80                  | 0.01                    | 0.89                        |
| 13              | 80-81             | 0.68                        | 4                                  | 0.83                  | 0.02                    | 0.91                        |
| 13              | 81-82             | 0.66                        | 3                                  | 0.81                  | 0.04                    | 0.89                        |
| 13              | 82-83             | 0.65                        | 3                                  | 0.82                  | 0.02                    | 0.89                        |
| 13              | 83-84             | 0.67                        | 4                                  | 0.82                  | 0.02                    | 0.90                        |
| 13              | 84-85             | 0.54                        | 4                                  | 0.77                  | 0.00                    | 0.89                        |
| 13              | 85-86             | 0.68                        | 4                                  | 0.83                  | 0.02                    | 0.90                        |
| 13              | 86-87             | 0.64                        | 3                                  | 0.81                  | 0.02                    | 0.90                        |
| 13              | 87-88             | 0.69                        | 4                                  | 0.84                  | 0.02                    | 0.91                        |
| 13              | 88-89             | 0.67                        | 4                                  | 0.82                  | 0.02                    | 0.90                        |
| 13              | 89-90             | 0.57                        | 4                                  | 0.78                  | 0.00                    | 0.90                        |
| 13              | 90-91             | 0.58                        | 4                                  | 0.79                  | 0.00                    | 0.91                        |
| 13              | 91-92             | 0.65                        | 5                                  | 0.81                  | 0.02                    | 0.90                        |

*Continued on next page*



Table S2 – Continued from previous page

| <b>Fault No</b> | <b>Sample Bin</b> | <b>Fault Detection Rate</b> | <b>Optimal Feature Subset Size</b> | <b>Model Accuracy</b> | <b>False Alarm Rate</b> | <b>Area Under the Curve</b> |
|-----------------|-------------------|-----------------------------|------------------------------------|-----------------------|-------------------------|-----------------------------|
| 13              | 92-93             | 0.53                        | 3                                  | 0.76                  | 0.00                    | 0.88                        |
| 13              | 93-94             | 0.50                        | 5                                  | 0.75                  | 0.00                    | 0.88                        |
| 13              | 94-95             | 0.68                        | 3                                  | 0.83                  | 0.02                    | 0.90                        |
| 13              | 95-96             | 0.64                        | 3                                  | 0.81                  | 0.01                    | 0.89                        |
| 13              | 96-97             | 0.62                        | 2                                  | 0.81                  | 0.00                    | 0.90                        |
| 13              | 97-98             | 0.66                        | 2                                  | 0.82                  | 0.02                    | 0.89                        |
| 13              | 98-99             | 0.60                        | 3                                  | 0.80                  | 0.01                    | 0.89                        |
| 13              | 99-100            | 0.63                        | 4                                  | 0.81                  | 0.00                    | 0.91                        |
| 13              | 100-101           | 0.69                        | 4                                  | 0.84                  | 0.01                    | 0.90                        |
| 13              | 101-102           | 0.67                        | 3                                  | 0.83                  | 0.01                    | 0.90                        |
| 13              | 102-103           | 0.69                        | 3                                  | 0.83                  | 0.03                    | 0.90                        |
| 13              | 103-104           | 0.69                        | 3                                  | 0.84                  | 0.02                    | 0.90                        |
| 13              | 104-105           | 0.65                        | 4                                  | 0.82                  | 0.01                    | 0.91                        |
| 13              | 105-106           | 0.63                        | 4                                  | 0.81                  | 0.01                    | 0.90                        |
| 13              | 106-107           | 0.68                        | 3                                  | 0.83                  | 0.02                    | 0.90                        |
| 13              | 107-108           | 0.68                        | 4                                  | 0.83                  | 0.02                    | 0.90                        |
| 13              | 108-109           | 0.70                        | 3                                  | 0.84                  | 0.02                    | 0.90                        |
| 13              | 109-110           | 0.71                        | 4                                  | 0.85                  | 0.02                    | 0.92                        |
| 13              | 110-111           | 0.72                        | 17                                 | 0.85                  | 0.02                    | 0.92                        |
| 13              | 111-112           | 0.70                        | 3                                  | 0.84                  | 0.03                    | 0.91                        |
| 13              | 112-113           | 0.70                        | 3                                  | 0.84                  | 0.01                    | 0.91                        |
| 13              | 113-114           | 0.74                        | 4                                  | 0.85                  | 0.04                    | 0.91                        |
| 13              | 114-115           | 0.72                        | 7                                  | 0.85                  | 0.02                    | 0.91                        |
| 13              | 115-116           | 0.79                        | 18                                 | 0.85                  | 0.08                    | 0.91                        |
| 13              | 116-117           | 0.75                        | 9                                  | 0.85                  | 0.04                    | 0.92                        |
| 13              | 117-118           | 0.70                        | 4                                  | 0.84                  | 0.01                    | 0.91                        |

*Continued on next page*

Table S2 – Continued from previous page

| <b>Fault No</b> | <b>Sample Bin</b> | <b>Fault Detection Rate</b> | <b>Optimal Feature Subset Size</b> | <b>Model Accuracy</b> | <b>False Alarm Rate</b> | <b>Area Under the Curve</b> |
|-----------------|-------------------|-----------------------------|------------------------------------|-----------------------|-------------------------|-----------------------------|
| 13              | 118-119           | 0.73                        | 13                                 | 0.84                  | 0.04                    | 0.91                        |
| 13              | 119-120           | 0.70                        | 3                                  | 0.84                  | 0.02                    | 0.90                        |
| 14              | 2-3               | 0.71                        | 3                                  | 0.71                  | 0.29                    | 0.77                        |
| 14              | 3-4               | 0.50                        | 22                                 | 0.46                  | 0.58                    | 0.46                        |
| 14              | 4-5               | 0.82                        | 1                                  | 0.63                  | 0.56                    | 0.67                        |
| 14              | 5-6               | 0.91                        | 9                                  | 0.52                  | 0.96                    | 1.00                        |
| 14              | 6-7               | 0.65                        | 2                                  | 0.49                  | 0.72                    | 0.94                        |
| 14              | 7-8               | 0.70                        | 1                                  | 0.49                  | 0.71                    | 0.72                        |
| 14              | 8-9               | 0.70                        | 55                                 | 0.67                  | 0.36                    | 0.74                        |
| 14              | 9-10              | 0.76                        | 9                                  | 0.73                  | 0.30                    | 0.78                        |
| 14              | 10-11             | 0.77                        | 33                                 | 0.77                  | 0.23                    | 0.86                        |
| 14              | 11-12             | 0.87                        | 15                                 | 0.86                  | 0.15                    | 0.93                        |
| 14              | 12-13             | 0.87                        | 20                                 | 0.87                  | 0.14                    | 0.94                        |
| 14              | 13-14             | 0.88                        | 52                                 | 0.87                  | 0.14                    | 0.95                        |
| 14              | 14-15             | 0.91                        | 40                                 | 0.89                  | 0.13                    | 0.96                        |
| 14              | 15-16             | 0.86                        | 44                                 | 0.87                  | 0.12                    | 0.95                        |
| 14              | 16-17             | 0.91                        | 29                                 | 0.91                  | 0.08                    | 0.97                        |
| 14              | 17-18             | 0.90                        | 32                                 | 0.92                  | 0.07                    | 0.97                        |
| 14              | 18-19             | 0.83                        | 22                                 | 0.88                  | 0.07                    | 0.95                        |
| 14              | 19-20             | 0.84                        | 47                                 | 0.87                  | 0.11                    | 0.94                        |
| 14              | 20-21             | 0.83                        | 22                                 | 0.88                  | 0.07                    | 0.95                        |
| 14              | 21-22             | 0.87                        | 41                                 | 0.88                  | 0.11                    | 0.95                        |
| 14              | 22-23             | 0.81                        | 20                                 | 0.84                  | 0.14                    | 0.91                        |
| 14              | 23-24             | 0.80                        | 7                                  | 0.85                  | 0.09                    | 0.92                        |
| 14              | 24-25             | 0.81                        | 19                                 | 0.85                  | 0.10                    | 0.92                        |
| 14              | 25-26             | 0.82                        | 23                                 | 0.84                  | 0.15                    | 0.91                        |

*Continued on next page*

Table S2 – Continued from previous page

| <b>Fault No</b> | <b>Sample Bin</b> | <b>Fault Detection Rate</b> | <b>Optimal Feature Subset Size</b> | <b>Model Accuracy</b> | <b>False Alarm Rate</b> | <b>Area Under the Curve</b> |
|-----------------|-------------------|-----------------------------|------------------------------------|-----------------------|-------------------------|-----------------------------|
| 14              | 26-27             | 0.83                        | 36                                 | 0.85                  | 0.13                    | 0.92                        |
| 14              | 27-28             | 0.81                        | 7                                  | 0.85                  | 0.12                    | 0.92                        |
| 14              | 28-29             | 0.83                        | 16                                 | 0.85                  | 0.14                    | 0.92                        |
| 14              | 29-30             | 0.83                        | 28                                 | 0.85                  | 0.13                    | 0.93                        |
| 14              | 30-31             | 0.83                        | 39                                 | 0.85                  | 0.12                    | 0.93                        |
| 14              | 31-32             | 0.82                        | 12                                 | 0.87                  | 0.09                    | 0.93                        |
| 14              | 32-33             | 0.83                        | 29                                 | 0.86                  | 0.11                    | 0.93                        |
| 14              | 33-34             | 0.87                        | 35                                 | 0.89                  | 0.10                    | 0.94                        |
| 14              | 34-35             | 0.83                        | 7                                  | 0.88                  | 0.07                    | 0.93                        |
| 14              | 35-36             | 0.84                        | 69                                 | 0.85                  | 0.13                    | 0.92                        |
| 14              | 36-37             | 0.84                        | 58                                 | 0.86                  | 0.11                    | 0.93                        |
| 14              | 37-38             | 0.83                        | 32                                 | 0.86                  | 0.10                    | 0.93                        |
| 14              | 38-39             | 0.82                        | 45                                 | 0.85                  | 0.12                    | 0.91                        |
| 14              | 39-40             | 0.81                        | 32                                 | 0.87                  | 0.08                    | 0.92                        |
| 14              | 40-41             | 0.84                        | 82                                 | 0.86                  | 0.12                    | 0.92                        |
| 14              | 41-42             | 0.84                        | 31                                 | 0.86                  | 0.12                    | 0.93                        |
| 14              | 42-43             | 0.83                        | 38                                 | 0.88                  | 0.07                    | 0.93                        |
| 14              | 43-44             | 0.87                        | 42                                 | 0.89                  | 0.09                    | 0.94                        |
| 14              | 44-45             | 0.82                        | 5                                  | 0.88                  | 0.05                    | 0.94                        |
| 14              | 45-46             | 0.82                        | 30                                 | 0.88                  | 0.07                    | 0.93                        |
| 14              | 46-47             | 0.81                        | 35                                 | 0.87                  | 0.08                    | 0.92                        |
| 14              | 47-48             | 0.83                        | 44                                 | 0.88                  | 0.07                    | 0.93                        |
| 14              | 48-49             | 0.82                        | 6                                  | 0.88                  | 0.06                    | 0.93                        |
| 14              | 49-50             | 0.83                        | 40                                 | 0.89                  | 0.05                    | 0.93                        |
| 14              | 50-51             | 0.86                        | 30                                 | 0.89                  | 0.07                    | 0.94                        |
| 14              | 51-52             | 0.82                        | 5                                  | 0.90                  | 0.02                    | 0.94                        |

*Continued on next page*

Table S2 – Continued from previous page

| <b>Fault No</b> | <b>Sample Bin</b> | <b>Fault Detection Rate</b> | <b>Optimal Feature Subset Size</b> | <b>Model Accuracy</b> | <b>False Alarm Rate</b> | <b>Area Under the Curve</b> |
|-----------------|-------------------|-----------------------------|------------------------------------|-----------------------|-------------------------|-----------------------------|
| 14              | 52-53             | 0.81                        | 6                                  | 0.88                  | 0.05                    | 0.93                        |
| 14              | 53-54             | 0.83                        | 7                                  | 0.88                  | 0.07                    | 0.94                        |
| 14              | 54-55             | 0.83                        | 5                                  | 0.90                  | 0.04                    | 0.94                        |
| 14              | 55-56             | 0.81                        | 12                                 | 0.85                  | 0.10                    | 0.91                        |
| 14              | 56-57             | 0.80                        | 4                                  | 0.88                  | 0.05                    | 0.93                        |
| 14              | 57-58             | 0.84                        | 4                                  | 0.90                  | 0.03                    | 0.95                        |
| 14              | 58-59             | 0.82                        | 9                                  | 0.89                  | 0.04                    | 0.93                        |
| 14              | 59-60             | 0.84                        | 17                                 | 0.86                  | 0.12                    | 0.92                        |
| 14              | 60-61             | 0.85                        | 10                                 | 0.90                  | 0.05                    | 0.94                        |
| 14              | 61-62             | 0.84                        | 25                                 | 0.89                  | 0.07                    | 0.94                        |
| 14              | 62-63             | 0.83                        | 21                                 | 0.87                  | 0.08                    | 0.93                        |
| 14              | 63-64             | 0.83                        | 4                                  | 0.90                  | 0.04                    | 0.95                        |
| 14              | 64-65             | 0.83                        | 12                                 | 0.88                  | 0.06                    | 0.93                        |
| 14              | 65-66             | 0.84                        | 6                                  | 0.89                  | 0.06                    | 0.94                        |
| 14              | 66-67             | 0.84                        | 4                                  | 0.90                  | 0.04                    | 0.95                        |
| 14              | 67-68             | 0.84                        | 3                                  | 0.90                  | 0.05                    | 0.94                        |
| 14              | 68-69             | 0.84                        | 5                                  | 0.90                  | 0.04                    | 0.95                        |
| 14              | 69-70             | 0.82                        | 8                                  | 0.89                  | 0.05                    | 0.93                        |
| 14              | 70-71             | 0.82                        | 3                                  | 0.89                  | 0.03                    | 0.93                        |
| 14              | 71-72             | 0.82                        | 3                                  | 0.89                  | 0.04                    | 0.94                        |
| 14              | 72-73             | 0.81                        | 4                                  | 0.89                  | 0.03                    | 0.94                        |
| 14              | 73-74             | 0.82                        | 3                                  | 0.89                  | 0.05                    | 0.94                        |
| 14              | 74-75             | 0.82                        | 4                                  | 0.89                  | 0.04                    | 0.93                        |
| 14              | 75-76             | 0.83                        | 7                                  | 0.89                  | 0.06                    | 0.94                        |
| 14              | 76-77             | 0.85                        | 5                                  | 0.91                  | 0.04                    | 0.95                        |
| 14              | 77-78             | 0.83                        | 4                                  | 0.90                  | 0.03                    | 0.95                        |

*Continued on next page*

Table S2 – *Continued from previous page*

| <b>Fault No</b> | <b>Sample Bin</b> | <b>Fault Detection Rate</b> | <b>Optimal Feature Subset Size</b> | <b>Model Accuracy</b> | <b>False Alarm Rate</b> | <b>Area Under the Curve</b> |
|-----------------|-------------------|-----------------------------|------------------------------------|-----------------------|-------------------------|-----------------------------|
| 14              | 78-79             | 0.82                        | 6                                  | 0.90                  | 0.02                    | 0.94                        |
| 14              | 79-80             | 0.82                        | 6                                  | 0.89                  | 0.04                    | 0.93                        |
| 14              | 80-81             | 0.83                        | 4                                  | 0.90                  | 0.02                    | 0.94                        |
| 14              | 81-82             | 0.84                        | 4                                  | 0.90                  | 0.03                    | 0.95                        |
| 14              | 82-83             | 0.83                        | 5                                  | 0.89                  | 0.05                    | 0.94                        |
| 14              | 83-84             | 0.84                        | 22                                 | 0.89                  | 0.06                    | 0.94                        |
| 14              | 84-85             | 0.85                        | 8                                  | 0.90                  | 0.04                    | 0.95                        |
| 14              | 85-86             | 0.85                        | 4                                  | 0.90                  | 0.04                    | 0.95                        |
| 14              | 86-87             | 0.82                        | 4                                  | 0.90                  | 0.02                    | 0.95                        |
| 14              | 87-88             | 0.84                        | 9                                  | 0.90                  | 0.04                    | 0.94                        |
| 14              | 88-89             | 0.81                        | 3                                  | 0.88                  | 0.04                    | 0.95                        |
| 14              | 89-90             | 0.77                        | 4                                  | 0.88                  | 0.01                    | 0.93                        |
| 14              | 90-91             | 0.79                        | 3                                  | 0.89                  | 0.02                    | 0.94                        |
| 14              | 91-92             | 0.80                        | 3                                  | 0.89                  | 0.02                    | 0.93                        |
| 14              | 92-93             | 0.82                        | 5                                  | 0.89                  | 0.03                    | 0.94                        |
| 14              | 93-94             | 0.83                        | 4                                  | 0.90                  | 0.02                    | 0.95                        |
| 14              | 94-95             | 0.83                        | 3                                  | 0.90                  | 0.03                    | 0.95                        |
| 14              | 95-96             | 0.83                        | 4                                  | 0.90                  | 0.02                    | 0.95                        |
| 14              | 96-97             | 0.86                        | 12                                 | 0.91                  | 0.04                    | 0.95                        |
| 14              | 97-98             | 0.85                        | 12                                 | 0.89                  | 0.06                    | 0.94                        |
| 14              | 98-99             | 0.81                        | 4                                  | 0.90                  | 0.01                    | 0.94                        |
| 14              | 99-100            | 0.78                        | 4                                  | 0.89                  | 0.01                    | 0.94                        |
| 14              | 100-101           | 0.81                        | 3                                  | 0.89                  | 0.03                    | 0.94                        |
| 14              | 101-102           | 0.81                        | 4                                  | 0.90                  | 0.01                    | 0.94                        |
| 14              | 102-103           | 0.82                        | 4                                  | 0.90                  | 0.02                    | 0.94                        |
| 14              | 103-104           | 0.82                        | 4                                  | 0.91                  | 0.01                    | 0.95                        |

*Continued on next page*

Table S2 – Continued from previous page

| <b>Fault No</b> | <b>Sample Bin</b> | <b>Fault Detection Rate</b> | <b>Optimal Feature Subset Size</b> | <b>Model Accuracy</b> | <b>False Alarm Rate</b> | <b>Area Under the Curve</b> |
|-----------------|-------------------|-----------------------------|------------------------------------|-----------------------|-------------------------|-----------------------------|
| 14              | 104-105           | 0.82                        | 4                                  | 0.90                  | 0.02                    | 0.95                        |
| 14              | 105-106           | 0.83                        | 28                                 | 0.88                  | 0.07                    | 0.94                        |
| 14              | 106-107           | 0.85                        | 4                                  | 0.91                  | 0.04                    | 0.96                        |
| 14              | 107-108           | 0.86                        | 22                                 | 0.90                  | 0.06                    | 0.95                        |
| 14              | 108-109           | 0.86                        | 24                                 | 0.90                  | 0.07                    | 0.95                        |
| 14              | 109-110           | 0.86                        | 6                                  | 0.90                  | 0.05                    | 0.96                        |
| 14              | 110-111           | 0.88                        | 35                                 | 0.90                  | 0.09                    | 0.96                        |
| 14              | 111-112           | 0.89                        | 14                                 | 0.91                  | 0.06                    | 0.96                        |
| 14              | 112-113           | 0.89                        | 24                                 | 0.91                  | 0.07                    | 0.97                        |
| 14              | 113-114           | 0.87                        | 34                                 | 0.91                  | 0.06                    | 0.96                        |
| 14              | 114-115           | 0.87                        | 4                                  | 0.91                  | 0.04                    | 0.96                        |
| 14              | 115-116           | 0.87                        | 9                                  | 0.91                  | 0.06                    | 0.96                        |
| 14              | 116-117           | 0.88                        | 4                                  | 0.92                  | 0.05                    | 0.96                        |
| 14              | 117-118           | 0.88                        | 4                                  | 0.92                  | 0.05                    | 0.97                        |
| 14              | 118-119           | 0.87                        | 17                                 | 0.91                  | 0.06                    | 0.96                        |
| 14              | 119-120           | 0.87                        | 23                                 | 0.91                  | 0.06                    | 0.96                        |
| 15              | 2-3               | 0.73                        | 26                                 | 0.50                  | 0.72                    | 0.59                        |
| 15              | 3-4               | 0.92                        | 13                                 | 0.56                  | 0.80                    | 0.59                        |
| 15              | 4-5               | 0.81                        | 13                                 | 0.50                  | 0.98                    | 0.98                        |
| 15              | 5-6               | 0.77                        | 26                                 | 0.76                  | 0.26                    | 0.84                        |
| 15              | 6-7               | 0.68                        | 131                                | 0.63                  | 0.41                    | 0.70                        |
| 15              | 7-8               | 0.74                        | 29                                 | 0.72                  | 0.29                    | 0.79                        |
| 15              | 8-9               | 0.62                        | 9                                  | 0.60                  | 0.41                    | 0.65                        |
| 15              | 9-10              | 0.78                        | 7                                  | 0.68                  | 0.42                    | 0.72                        |
| 15              | 10-11             | 0.77                        | 40                                 | 0.68                  | 0.40                    | 0.73                        |
| 15              | 11-12             | 0.66                        | 156                                | 0.63                  | 0.40                    | 0.67                        |

*Continued on next page*

Table S2 – Continued from previous page

| <b>Fault No</b> | <b>Sample Bin</b> | <b>Fault Detection Rate</b> | <b>Optimal Feature Subset Size</b> | <b>Model Accuracy</b> | <b>False Alarm Rate</b> | <b>Area Under the Curve</b> |
|-----------------|-------------------|-----------------------------|------------------------------------|-----------------------|-------------------------|-----------------------------|
| 15              | 12-13             | 0.72                        | 36                                 | 0.71                  | 0.31                    | 0.77                        |
| 15              | 13-14             | 0.61                        | 164                                | 0.61                  | 0.40                    | 0.67                        |
| 15              | 14-15             | 0.59                        | 134                                | 0.60                  | 0.40                    | 0.65                        |
| 15              | 15-16             | 0.63                        | 153                                | 0.61                  | 0.42                    | 0.66                        |
| 15              | 16-17             | 0.70                        | 11                                 | 0.64                  | 0.41                    | 0.68                        |
| 15              | 17-18             | 0.66                        | 65                                 | 0.66                  | 0.33                    | 0.72                        |
| 15              | 18-19             | 0.61                        | 73                                 | 0.59                  | 0.43                    | 0.63                        |
| 15              | 19-20             | 0.57                        | 204                                | 0.58                  | 0.41                    | 0.61                        |
| 15              | 20-21             | 0.65                        | 271                                | 0.58                  | 0.49                    | 0.61                        |
| 15              | 21-22             | 0.69                        | 48                                 | 0.68                  | 0.33                    | 0.74                        |
| 15              | 22-23             | 0.80                        | 39                                 | 0.80                  | 0.20                    | 0.88                        |
| 15              | 23-24             | 0.81                        | 52                                 | 0.84                  | 0.13                    | 0.91                        |
| 15              | 24-25             | 0.79                        | 19                                 | 0.86                  | 0.06                    | 0.93                        |
| 15              | 25-26             | 0.79                        | 42                                 | 0.85                  | 0.08                    | 0.93                        |
| 15              | 26-27             | 0.86                        | 33                                 | 0.89                  | 0.09                    | 0.96                        |
| 15              | 27-28             | 0.82                        | 71                                 | 0.87                  | 0.08                    | 0.94                        |
| 15              | 28-29             | 0.89                        | 30                                 | 0.92                  | 0.05                    | 0.97                        |
| 15              | 29-30             | 0.87                        | 60                                 | 0.90                  | 0.07                    | 0.96                        |
| 15              | 30-31             | 0.90                        | 39                                 | 0.92                  | 0.05                    | 0.98                        |
| 15              | 31-32             | 0.92                        | 40                                 | 0.93                  | 0.06                    | 0.98                        |
| 15              | 32-33             | 0.90                        | 23                                 | 0.94                  | 0.03                    | 0.98                        |
| 15              | 33-34             | 0.93                        | 6                                  | 0.95                  | 0.03                    | 0.98                        |
| 15              | 34-35             | 0.92                        | 39                                 | 0.94                  | 0.04                    | 0.98                        |
| 15              | 35-36             | 0.90                        | 26                                 | 0.94                  | 0.02                    | 0.99                        |
| 15              | 36-37             | 0.91                        | 37                                 | 0.94                  | 0.02                    | 0.99                        |
| 15              | 37-38             | 0.93                        | 36                                 | 0.95                  | 0.03                    | 0.99                        |

*Continued on next page*

Table S2 – Continued from previous page

| <b>Fault No</b> | <b>Sample Bin</b> | <b>Fault Detection Rate</b> | <b>Optimal Feature Subset Size</b> | <b>Model Accuracy</b> | <b>False Alarm Rate</b> | <b>Area Under the Curve</b> |
|-----------------|-------------------|-----------------------------|------------------------------------|-----------------------|-------------------------|-----------------------------|
| 15              | 38-39             | 0.91                        | 30                                 | 0.95                  | 0.01                    | 0.99                        |
| 15              | 39-40             | 0.94                        | 58                                 | 0.96                  | 0.02                    | 0.99                        |
| 15              | 40-41             | 0.93                        | 28                                 | 0.96                  | 0.01                    | 1.00                        |
| 15              | 41-42             | 0.94                        | 47                                 | 0.96                  | 0.02                    | 0.99                        |
| 15              | 42-43             | 0.97                        | 33                                 | 0.98                  | 0.02                    | 1.00                        |
| 15              | 43-44             | 0.97                        | 40                                 | 0.98                  | 0.01                    | 1.00                        |
| 15              | 44-45             | 0.94                        | 5                                  | 0.96                  | 0.02                    | 0.99                        |
| 15              | 45-46             | 0.97                        | 104                                | 0.98                  | 0.01                    | 1.00                        |
| 15              | 46-47             | 0.98                        | 77                                 | 0.98                  | 0.01                    | 1.00                        |
| 15              | 47-48             | 0.94                        | 10                                 | 0.97                  | 0.01                    | 0.99                        |
| 15              | 48-49             | 0.97                        | 41                                 | 0.98                  | 0.00                    | 1.00                        |
| 15              | 49-50             | 0.96                        | 74                                 | 0.98                  | 0.00                    | 1.00                        |
| 15              | 50-51             | 0.98                        | 52                                 | 0.99                  | 0.00                    | 1.00                        |
| 15              | 51-52             | 1.00                        | 93                                 | 1.00                  | 0.00                    | 1.00                        |
| 15              | 52-53             | 0.99                        | 51                                 | 0.99                  | 0.00                    | 1.00                        |
| 15              | 53-54             | 0.99                        | 66                                 | 1.00                  | 0.00                    | 1.00                        |
| 15              | 54-55             | 0.99                        | 111                                | 0.99                  | 0.00                    | 1.00                        |
| 15              | 55-56             | 0.99                        | 98                                 | 0.99                  | 0.00                    | 1.00                        |
| 15              | 56-57             | 0.99                        | 40                                 | 0.99                  | 0.00                    | 1.00                        |
| 15              | 57-58             | 1.00                        | 60                                 | 1.00                  | 0.00                    | 1.00                        |
| 15              | 58-59             | 0.99                        | 25                                 | 1.00                  | 0.00                    | 1.00                        |
| 15              | 59-60             | 0.99                        | 57                                 | 1.00                  | 0.00                    | 1.00                        |
| 15              | 60-61             | 0.99                        | 125                                | 0.99                  | 0.00                    | 1.00                        |
| 15              | 61-62             | 1.00                        | 64                                 | 1.00                  | 0.00                    | 1.00                        |
| 15              | 62-63             | 0.99                        | 26                                 | 1.00                  | 0.00                    | 1.00                        |
| 15              | 63-64             | 1.00                        | 97                                 | 1.00                  | 0.00                    | 1.00                        |

*Continued on next page*



Table S2 – Continued from previous page

| <b>Fault No</b> | <b>Sample Bin</b> | <b>Fault Detection Rate</b> | <b>Optimal Feature Subset Size</b> | <b>Model Accuracy</b> | <b>False Alarm Rate</b> | <b>Area Under the Curve</b> |
|-----------------|-------------------|-----------------------------|------------------------------------|-----------------------|-------------------------|-----------------------------|
| 15              | 64-65             | 0.99                        | 152                                | 1.00                  | 0.00                    | 1.00                        |
| 15              | 65-66             | 0.99                        | 147                                | 0.99                  | 0.00                    | 1.00                        |
| 15              | 66-67             | 1.00                        | 95                                 | 1.00                  | 0.00                    | 1.00                        |
| 15              | 67-68             | 1.00                        | 124                                | 1.00                  | 0.00                    | 1.00                        |
| 15              | 68-69             | 1.00                        | 135                                | 1.00                  | 0.00                    | 1.00                        |
| 15              | 69-70             | 1.00                        | 76                                 | 1.00                  | 0.00                    | 1.00                        |
| 15              | 70-71             | 0.99                        | 44                                 | 1.00                  | 0.00                    | 1.00                        |
| 15              | 71-72             | 0.98                        | 82                                 | 0.99                  | 0.00                    | 1.00                        |
| 15              | 72-73             | 0.99                        | 50                                 | 1.00                  | 0.00                    | 1.00                        |
| 15              | 73-74             | 0.99                        | 67                                 | 0.99                  | 0.00                    | 1.00                        |
| 15              | 74-75             | 0.99                        | 22                                 | 1.00                  | 0.00                    | 1.00                        |
| 15              | 75-76             | 0.99                        | 146                                | 1.00                  | 0.00                    | 1.00                        |
| 15              | 76-77             | 0.99                        | 131                                | 1.00                  | 0.00                    | 1.00                        |
| 15              | 77-78             | 0.99                        | 110                                | 0.99                  | 0.00                    | 1.00                        |
| 15              | 78-79             | 0.99                        | 134                                | 1.00                  | 0.00                    | 1.00                        |
| 15              | 79-80             | 0.99                        | 72                                 | 1.00                  | 0.00                    | 1.00                        |
| 15              | 80-81             | 1.00                        | 34                                 | 1.00                  | 0.00                    | 1.00                        |
| 15              | 81-82             | 1.00                        | 63                                 | 1.00                  | 0.00                    | 1.00                        |
| 15              | 82-83             | 0.99                        | 101                                | 1.00                  | 0.00                    | 1.00                        |
| 15              | 83-84             | 0.99                        | 76                                 | 0.99                  | 0.00                    | 1.00                        |
| 15              | 84-85             | 1.00                        | 65                                 | 1.00                  | 0.00                    | 1.00                        |
| 15              | 85-86             | 1.00                        | 130                                | 1.00                  | 0.00                    | 1.00                        |
| 15              | 86-87             | 1.00                        | 14                                 | 1.00                  | 0.00                    | 1.00                        |
| 15              | 87-88             | 0.99                        | 8                                  | 1.00                  | 0.00                    | 1.00                        |
| 15              | 88-89             | 0.99                        | 74                                 | 1.00                  | 0.00                    | 1.00                        |
| 15              | 89-90             | 1.00                        | 88                                 | 1.00                  | 0.00                    | 1.00                        |

*Continued on next page*

Table S2 – Continued from previous page

| <b>Fault No</b> | <b>Sample Bin</b> | <b>Fault Detection Rate</b> | <b>Optimal Feature Subset Size</b> | <b>Model Accuracy</b> | <b>False Alarm Rate</b> | <b>Area Under the Curve</b> |
|-----------------|-------------------|-----------------------------|------------------------------------|-----------------------|-------------------------|-----------------------------|
| 15              | 90-91             | 0.99                        | 72                                 | 1.00                  | 0.00                    | 1.00                        |
| 15              | 91-92             | 0.99                        | 76                                 | 1.00                  | 0.00                    | 1.00                        |
| 15              | 92-93             | 0.99                        | 166                                | 1.00                  | 0.00                    | 1.00                        |
| 15              | 93-94             | 0.99                        | 28                                 | 1.00                  | 0.00                    | 1.00                        |
| 15              | 94-95             | 0.99                        | 81                                 | 1.00                  | 0.00                    | 1.00                        |
| 15              | 95-96             | 0.99                        | 88                                 | 1.00                  | 0.00                    | 1.00                        |
| 15              | 96-97             | 0.99                        | 178                                | 1.00                  | 0.00                    | 1.00                        |
| 15              | 97-98             | 0.99                        | 70                                 | 1.00                  | 0.00                    | 1.00                        |
| 15              | 98-99             | 0.99                        | 54                                 | 0.99                  | 0.00                    | 1.00                        |
| 15              | 99-100            | 1.00                        | 77                                 | 1.00                  | 0.00                    | 1.00                        |
| 15              | 100-101           | 0.99                        | 85                                 | 1.00                  | 0.00                    | 1.00                        |
| 15              | 101-102           | 0.99                        | 143                                | 1.00                  | 0.00                    | 1.00                        |
| 15              | 102-103           | 0.99                        | 88                                 | 1.00                  | 0.00                    | 1.00                        |
| 15              | 103-104           | 0.99                        | 88                                 | 1.00                  | 0.00                    | 1.00                        |
| 15              | 104-105           | 0.99                        | 127                                | 1.00                  | 0.00                    | 1.00                        |
| 15              | 105-106           | 0.99                        | 63                                 | 1.00                  | 0.00                    | 1.00                        |
| 15              | 106-107           | 0.99                        | 71                                 | 1.00                  | 0.00                    | 1.00                        |
| 15              | 107-108           | 1.00                        | 174                                | 1.00                  | 0.00                    | 1.00                        |
| 15              | 108-109           | 1.00                        | 84                                 | 1.00                  | 0.00                    | 1.00                        |
| 15              | 109-110           | 1.00                        | 65                                 | 1.00                  | 0.00                    | 1.00                        |
| 15              | 110-111           | 1.00                        | 86                                 | 1.00                  | 0.00                    | 1.00                        |
| 15              | 111-112           | 1.00                        | 202                                | 1.00                  | 0.00                    | 1.00                        |
| 15              | 112-113           | 1.00                        | 81                                 | 1.00                  | 0.00                    | 1.00                        |
| 15              | 113-114           | 1.00                        | 119                                | 1.00                  | 0.00                    | 1.00                        |
| 15              | 114-115           | 1.00                        | 95                                 | 1.00                  | 0.00                    | 1.00                        |
| 15              | 115-116           | 1.00                        | 122                                | 1.00                  | 0.00                    | 1.00                        |

*Continued on next page*

Table S2 – Continued from previous page

| <b>Fault No</b> | <b>Sample Bin</b> | <b>Fault Detection Rate</b> | <b>Optimal Feature Subset Size</b> | <b>Model Accuracy</b> | <b>False Alarm Rate</b> | <b>Area Under the Curve</b> |
|-----------------|-------------------|-----------------------------|------------------------------------|-----------------------|-------------------------|-----------------------------|
| 15              | 116-117           | 1.00                        | 143                                | 1.00                  | 0.00                    | 1.00                        |
| 15              | 117-118           | 1.00                        | 86                                 | 1.00                  | 0.00                    | 1.00                        |
| 15              | 118-119           | 1.00                        | 139                                | 1.00                  | 0.00                    | 1.00                        |
| 15              | 119-120           | 1.00                        | 145                                | 1.00                  | 0.00                    | 1.00                        |

Table S3: Fault & Time-specific Model Performances with respect to the Evolving Time Horizon Approach. The alternative models can be provided upon request.

| <b>Fault No</b> | <b>Sample Bin</b> | <b>Fault Detection Rate</b> | <b>Optimal Feature Subset Size</b> | <b>Model Accuracy</b> | <b>False Alarm Rate</b> | <b>Area Under the Curve</b> |
|-----------------|-------------------|-----------------------------|------------------------------------|-----------------------|-------------------------|-----------------------------|
| 1               | 2                 | 0.65                        | 8                                  | 0.59                  | 0.47                    | 0.65                        |
| 1               | 3                 | 0.58                        | 43                                 | 0.59                  | 0.40                    | 0.63                        |
| 1               | 4                 | 0.78                        | 70                                 | 0.72                  | 0.34                    | 0.78                        |
| 1               | 5                 | 0.83                        | 61                                 | 0.78                  | 0.28                    | 0.85                        |
| 1               | 6                 | 0.95                        | 4                                  | 0.53                  | 0.89                    | 0.95                        |
| 1               | 7                 | 0.84                        | 58                                 | 0.72                  | 0.41                    | 0.79                        |
| 1               | 8                 | 0.99                        | 1                                  | 0.52                  | 0.94                    | 0.97                        |
| 1               | 9                 | 0.78                        | 55                                 | 0.74                  | 0.31                    | 0.81                        |
| 1               | 10                | 0.78                        | 73                                 | 0.73                  | 0.31                    | 0.81                        |
| 1               | 11                | 0.74                        | 171                                | 0.59                  | 0.55                    | 0.67                        |
| 1               | 12                | 0.76                        | 40                                 | 0.70                  | 0.35                    | 0.77                        |
| 1               | 13                | 0.72                        | 109                                | 0.68                  | 0.36                    | 0.74                        |
| 1               | 14                | 0.68                        | 433                                | 0.54                  | 0.64                    | 0.54                        |
| 1               | 15                | 0.74                        | 31                                 | 0.69                  | 0.36                    | 0.75                        |
| 1               | 16                | 0.61                        | 11                                 | 0.54                  | 0.54                    | 0.56                        |
| 1               | 17                | 0.75                        | 59                                 | 0.69                  | 0.36                    | 0.75                        |
| 1               | 18                | 0.65                        | 403                                | 0.52                  | 0.63                    | 0.53                        |

*Continued on next page*

Table S3 – *Continued from previous page*

| <b>Fault No</b> | <b>Sample Bin</b> | <b>Fault Detection Rate</b> | <b>Optimal Feature Subset Size</b> | <b>Model Accuracy</b> | <b>False Alarm Rate</b> | <b>Area Under the Curve</b> |
|-----------------|-------------------|-----------------------------|------------------------------------|-----------------------|-------------------------|-----------------------------|
| 1               | 19                | 0.63                        | 517                                | 0.54                  | 0.57                    | 0.55                        |
| 1               | 20                | 0.82                        | 1                                  | 0.55                  | 0.72                    | 0.57                        |
| 1               | 21                | 0.75                        | 62                                 | 0.69                  | 0.37                    | 0.75                        |
| 1               | 22                | 0.99                        | 3                                  | 0.51                  | 0.99                    | 1.00                        |
| 1               | 23                | 0.96                        | 3                                  | 0.50                  | 0.99                    | 1.00                        |
| 1               | 24                | 0.92                        | 1                                  | 0.50                  | 0.99                    | 1.00                        |
| 1               | 25                | 0.81                        | 511                                | 0.60                  | 0.61                    | 0.65                        |
| 1               | 26                | 0.81                        | 513                                | 0.62                  | 0.57                    | 0.66                        |
| 1               | 27                | 0.82                        | 498                                | 0.62                  | 0.59                    | 0.67                        |
| 1               | 28                | 0.81                        | 583                                | 0.61                  | 0.60                    | 0.66                        |
| 1               | 29                | 0.82                        | 563                                | 0.62                  | 0.59                    | 0.67                        |
| 1               | 30                | 0.76                        | 172                                | 0.80                  | 0.16                    | 0.89                        |
| 1               | 31                | 0.76                        | 117                                | 0.80                  | 0.15                    | 0.89                        |
| 1               | 32                | 0.75                        | 153                                | 0.80                  | 0.16                    | 0.89                        |
| 1               | 33                | 0.76                        | 148                                | 0.81                  | 0.15                    | 0.89                        |
| 1               | 34                | 0.75                        | 165                                | 0.81                  | 0.14                    | 0.89                        |
| 1               | 35                | 0.72                        | 160                                | 0.78                  | 0.16                    | 0.87                        |
| 1               | 36                | 0.74                        | 147                                | 0.80                  | 0.14                    | 0.89                        |
| 1               | 37                | 0.75                        | 194                                | 0.81                  | 0.13                    | 0.90                        |
| 1               | 38                | 0.75                        | 159                                | 0.81                  | 0.14                    | 0.89                        |
| 1               | 39                | 0.75                        | 187                                | 0.81                  | 0.13                    | 0.90                        |
| 1               | 40                | 0.73                        | 181                                | 0.81                  | 0.12                    | 0.90                        |
| 1               | 41                | 0.74                        | 188                                | 0.82                  | 0.11                    | 0.90                        |
| 1               | 42                | 0.73                        | 177                                | 0.81                  | 0.11                    | 0.90                        |
| 1               | 43                | 0.73                        | 221                                | 0.80                  | 0.12                    | 0.89                        |
| 1               | 44                | 0.73                        | 223                                | 0.82                  | 0.10                    | 0.89                        |

*Continued on next page*

Table S3 – *Continued from previous page*

| <b>Fault No</b> | <b>Sample Bin</b> | <b>Fault Detection Rate</b> | <b>Optimal Feature Subset Size</b> | <b>Model Accuracy</b> | <b>False Alarm Rate</b> | <b>Area Under the Curve</b> |
|-----------------|-------------------|-----------------------------|------------------------------------|-----------------------|-------------------------|-----------------------------|
| 1               | 45                | 0.66                        | 191                                | 0.80                  | 0.06                    | 0.89                        |
| 1               | 46                | 0.73                        | 250                                | 0.81                  | 0.10                    | 0.89                        |
| 1               | 47                | 0.73                        | 232                                | 0.82                  | 0.10                    | 0.89                        |
| 1               | 48                | 0.74                        | 217                                | 0.82                  | 0.09                    | 0.90                        |
| 1               | 49                | 0.74                        | 243                                | 0.82                  | 0.09                    | 0.90                        |
| 1               | 50                | 0.73                        | 259                                | 0.81                  | 0.10                    | 0.89                        |
| 1               | 51                | 0.73                        | 247                                | 0.82                  | 0.09                    | 0.90                        |
| 1               | 52                | 0.73                        | 285                                | 0.82                  | 0.09                    | 0.90                        |
| 1               | 53                | 0.73                        | 260                                | 0.82                  | 0.10                    | 0.89                        |
| 1               | 54                | 0.73                        | 11                                 | 0.87                  | 0.00                    | 0.94                        |
| 1               | 55                | 0.73                        | 309                                | 0.82                  | 0.10                    | 0.90                        |
| 1               | 56                | 0.73                        | 321                                | 0.81                  | 0.11                    | 0.90                        |
| 1               | 57                | 0.74                        | 31                                 | 0.87                  | 0.00                    | 0.94                        |
| 1               | 58                | 0.73                        | 39                                 | 0.87                  | 0.00                    | 0.94                        |
| 1               | 59                | 0.74                        | 318                                | 0.82                  | 0.10                    | 0.91                        |
| 1               | 60                | 0.74                        | 431                                | 0.83                  | 0.08                    | 0.91                        |
| 1               | 61                | 0.74                        | 337                                | 0.83                  | 0.09                    | 0.91                        |
| 1               | 62                | 0.74                        | 338                                | 0.83                  | 0.09                    | 0.91                        |
| 1               | 63                | 0.75                        | 401                                | 0.84                  | 0.08                    | 0.92                        |
| 1               | 64                | 0.75                        | 359                                | 0.84                  | 0.08                    | 0.91                        |
| 1               | 65                | 0.75                        | 351                                | 0.83                  | 0.08                    | 0.92                        |
| 1               | 66                | 0.76                        | 380                                | 0.84                  | 0.08                    | 0.92                        |
| 1               | 67                | 0.76                        | 418                                | 0.84                  | 0.08                    | 0.92                        |
| 1               | 68                | 0.75                        | 448                                | 0.83                  | 0.08                    | 0.92                        |
| 1               | 69                | 0.75                        | 405                                | 0.84                  | 0.08                    | 0.92                        |
| 1               | 70                | 0.76                        | 424                                | 0.84                  | 0.08                    | 0.92                        |

*Continued on next page*

Table S3 – *Continued from previous page*

| <b>Fault No</b> | <b>Sample Bin</b> | <b>Fault Detection Rate</b> | <b>Optimal Feature Subset Size</b> | <b>Model Accuracy</b> | <b>False Alarm Rate</b> | <b>Area Under the Curve</b> |
|-----------------|-------------------|-----------------------------|------------------------------------|-----------------------|-------------------------|-----------------------------|
| 1               | 71                | 0.76                        | 435                                | 0.85                  | 0.06                    | 0.92                        |
| 1               | 72                | 0.76                        | 441                                | 0.84                  | 0.07                    | 0.92                        |
| 1               | 73                | 0.74                        | 445                                | 0.84                  | 0.07                    | 0.92                        |
| 1               | 74                | 0.75                        | 451                                | 0.84                  | 0.07                    | 0.92                        |
| 1               | 75                | 0.77                        | 494                                | 0.85                  | 0.07                    | 0.93                        |
| 1               | 76                | 0.77                        | 502                                | 0.85                  | 0.06                    | 0.93                        |
| 1               | 77                | 0.76                        | 497                                | 0.85                  | 0.06                    | 0.93                        |
| 1               | 78                | 0.77                        | 521                                | 0.85                  | 0.06                    | 0.93                        |
| 1               | 79                | 0.77                        | 561                                | 0.86                  | 0.06                    | 0.94                        |
| 1               | 80                | 0.77                        | 519                                | 0.86                  | 0.06                    | 0.94                        |
| 1               | 81                | 0.77                        | 510                                | 0.86                  | 0.05                    | 0.93                        |
| 1               | 82                | 0.78                        | 540                                | 0.86                  | 0.06                    | 0.93                        |
| 1               | 83                | 0.78                        | 524                                | 0.86                  | 0.06                    | 0.94                        |
| 1               | 84                | 0.78                        | 572                                | 0.87                  | 0.05                    | 0.94                        |
| 1               | 85                | 0.78                        | 544                                | 0.85                  | 0.07                    | 0.93                        |
| 1               | 86                | 0.78                        | 561                                | 0.86                  | 0.06                    | 0.94                        |
| 1               | 87                | 0.78                        | 626                                | 0.86                  | 0.06                    | 0.94                        |
| 1               | 88                | 0.77                        | 637                                | 0.86                  | 0.05                    | 0.94                        |
| 1               | 89                | 0.77                        | 657                                | 0.86                  | 0.06                    | 0.93                        |
| 1               | 90                | 0.78                        | 622                                | 0.86                  | 0.06                    | 0.94                        |
| 1               | 91                | 0.77                        | 638                                | 0.86                  | 0.05                    | 0.94                        |
| 1               | 92                | 0.77                        | 690                                | 0.85                  | 0.06                    | 0.93                        |
| 1               | 93                | 0.77                        | 641                                | 0.86                  | 0.06                    | 0.93                        |
| 1               | 94                | 0.78                        | 618                                | 0.86                  | 0.05                    | 0.94                        |
| 1               | 95                | 0.77                        | 678                                | 0.85                  | 0.06                    | 0.93                        |
| 1               | 96                | 0.78                        | 720                                | 0.86                  | 0.05                    | 0.94                        |

*Continued on next page*

Table S3 – *Continued from previous page*

| <b>Fault No</b> | <b>Sample Bin</b> | <b>Fault Detection Rate</b> | <b>Optimal Feature Subset Size</b> | <b>Model Accuracy</b> | <b>False Alarm Rate</b> | <b>Area Under the Curve</b> |
|-----------------|-------------------|-----------------------------|------------------------------------|-----------------------|-------------------------|-----------------------------|
| 1               | 97                | 0.78                        | 646                                | 0.87                  | 0.05                    | 0.94                        |
| 1               | 98                | 0.77                        | 740                                | 0.86                  | 0.05                    | 0.94                        |
| 1               | 99                | 0.77                        | 782                                | 0.86                  | 0.06                    | 0.94                        |
| 1               | 100               | 0.78                        | 879                                | 0.86                  | 0.05                    | 0.94                        |
| 1               | 101               | 0.78                        | 754                                | 0.86                  | 0.05                    | 0.94                        |
| 1               | 102               | 0.77                        | 760                                | 0.86                  | 0.05                    | 0.94                        |
| 1               | 103               | 0.78                        | 822                                | 0.86                  | 0.05                    | 0.94                        |
| 1               | 104               | 0.77                        | 659                                | 0.86                  | 0.04                    | 0.94                        |
| 1               | 105               | 0.78                        | 763                                | 0.86                  | 0.05                    | 0.94                        |
| 1               | 106               | 0.77                        | 761                                | 0.86                  | 0.06                    | 0.94                        |
| 1               | 107               | 0.78                        | 706                                | 0.87                  | 0.05                    | 0.94                        |
| 1               | 108               | 0.77                        | 837                                | 0.87                  | 0.04                    | 0.94                        |
| 1               | 109               | 0.79                        | 799                                | 0.87                  | 0.05                    | 0.95                        |
| 1               | 110               | 0.79                        | 870                                | 0.88                  | 0.04                    | 0.95                        |
| 1               | 111               | 0.78                        | 891                                | 0.87                  | 0.04                    | 0.95                        |
| 1               | 112               | 0.78                        | 801                                | 0.87                  | 0.05                    | 0.94                        |
| 1               | 113               | 0.81                        | 800                                | 0.87                  | 0.07                    | 0.94                        |
| 1               | 114               | 0.79                        | 836                                | 0.87                  | 0.04                    | 0.95                        |
| 1               | 115               | 0.79                        | 920                                | 0.87                  | 0.04                    | 0.95                        |
| 1               | 116               | 0.79                        | 978                                | 0.87                  | 0.04                    | 0.95                        |
| 1               | 117               | 0.79                        | 856                                | 0.88                  | 0.04                    | 0.95                        |
| 1               | 118               | 0.79                        | 834                                | 0.87                  | 0.04                    | 0.95                        |
| 1               | 119               | 0.79                        | 983                                | 0.88                  | 0.04                    | 0.95                        |
| 1               | 120               | 0.78                        | 896                                | 0.87                  | 0.04                    | 0.94                        |
| 2               | 2                 | 0.81                        | 29                                 | 0.79                  | 0.24                    | 0.88                        |
| 2               | 3                 | 0.52                        | 1                                  | 0.51                  | 0.50                    | 0.50                        |

*Continued on next page*

Table S3 – *Continued from previous page*

| <b>Fault No</b> | <b>Sample Bin</b> | <b>Fault Detection Rate</b> | <b>Optimal Feature Subset Size</b> | <b>Model Accuracy</b> | <b>False Alarm Rate</b> | <b>Area Under the Curve</b> |
|-----------------|-------------------|-----------------------------|------------------------------------|-----------------------|-------------------------|-----------------------------|
| 2               | 4                 | 0.70                        | 16                                 | 0.52                  | 0.66                    | 0.63                        |
| 2               | 5                 | 0.62                        | 48                                 | 0.49                  | 0.63                    | 0.56                        |
| 2               | 6                 | 0.77                        | 12                                 | 0.49                  | 0.78                    | 0.92                        |
| 2               | 7                 | 0.56                        | 131                                | 0.54                  | 0.48                    | 0.57                        |
| 2               | 8                 | 0.66                        | 321                                | 0.56                  | 0.59                    | 0.56                        |
| 2               | 9                 | 0.55                        | 401                                | 0.52                  | 0.50                    | 0.52                        |
| 2               | 10                | 0.81                        | 8                                  | 0.50                  | 0.81                    | 0.88                        |
| 2               | 11                | 0.74                        | 9                                  | 0.50                  | 0.75                    | 0.94                        |
| 2               | 12                | 0.60                        | 452                                | 0.54                  | 0.52                    | 0.55                        |
| 2               | 13                | 0.97                        | 133                                | 0.50                  | 0.98                    | 0.70                        |
| 2               | 14                | 0.71                        | 36                                 | 0.69                  | 0.33                    | 0.74                        |
| 2               | 15                | 0.73                        | 121                                | 0.71                  | 0.31                    | 0.78                        |
| 2               | 16                | 0.92                        | 5                                  | 0.51                  | 0.91                    | 0.95                        |
| 2               | 17                | 0.68                        | 5                                  | 0.50                  | 0.67                    | 0.53                        |
| 2               | 18                | 0.67                        | 679                                | 0.54                  | 0.60                    | 0.55                        |
| 2               | 19                | 0.84                        | 5                                  | 0.50                  | 0.97                    | 0.99                        |
| 2               | 20                | 0.69                        | 405                                | 0.60                  | 0.50                    | 0.65                        |
| 2               | 21                | 0.76                        | 130                                | 0.77                  | 0.22                    | 0.85                        |
| 2               | 22                | 0.77                        | 182                                | 0.77                  | 0.23                    | 0.85                        |
| 2               | 23                | 0.78                        | 3                                  | 0.50                  | 0.81                    | 0.98                        |
| 2               | 24                | 0.85                        | 6                                  | 0.50                  | 0.86                    | 0.98                        |
| 2               | 25                | 0.79                        | 96                                 | 0.79                  | 0.21                    | 0.87                        |
| 2               | 26                | 0.82                        | 566                                | 0.61                  | 0.60                    | 0.64                        |
| 2               | 27                | 0.77                        | 219                                | 0.79                  | 0.20                    | 0.88                        |
| 2               | 28                | 0.82                        | 608                                | 0.60                  | 0.61                    | 0.64                        |
| 2               | 29                | 0.80                        | 583                                | 0.61                  | 0.58                    | 0.64                        |

*Continued on next page*



Table S3 – *Continued from previous page*

| <b>Fault No</b> | <b>Sample Bin</b> | <b>Fault Detection Rate</b> | <b>Optimal Feature Subset Size</b> | <b>Model Accuracy</b> | <b>False Alarm Rate</b> | <b>Area Under the Curve</b> |
|-----------------|-------------------|-----------------------------|------------------------------------|-----------------------|-------------------------|-----------------------------|
| 2               | 30                | 0.77                        | 235                                | 0.58                  | 0.61                    | 0.61                        |
| 2               | 31                | 0.79                        | 650                                | 0.61                  | 0.57                    | 0.65                        |
| 2               | 32                | 0.93                        | 550                                | 0.53                  | 0.88                    | 0.62                        |
| 2               | 33                | 0.94                        | 600                                | 0.52                  | 0.89                    | 0.60                        |
| 2               | 34                | 0.95                        | 748                                | 0.52                  | 0.91                    | 0.60                        |
| 2               | 35                | 0.95                        | 510                                | 0.53                  | 0.88                    | 0.61                        |
| 2               | 36                | 0.78                        | 744                                | 0.61                  | 0.57                    | 0.65                        |
| 2               | 37                | 0.76                        | 104                                | 0.80                  | 0.16                    | 0.89                        |
| 2               | 38                | 0.97                        | 701                                | 0.52                  | 0.93                    | 0.62                        |
| 2               | 39                | 0.77                        | 137                                | 0.81                  | 0.15                    | 0.89                        |
| 2               | 40                | 0.76                        | 151                                | 0.80                  | 0.15                    | 0.89                        |
| 2               | 41                | 0.75                        | 132                                | 0.80                  | 0.15                    | 0.89                        |
| 2               | 42                | 0.76                        | 120                                | 0.82                  | 0.13                    | 0.90                        |
| 2               | 43                | 0.74                        | 137                                | 0.79                  | 0.16                    | 0.88                        |
| 2               | 44                | 0.75                        | 118                                | 0.81                  | 0.13                    | 0.89                        |
| 2               | 45                | 0.75                        | 154                                | 0.81                  | 0.13                    | 0.89                        |
| 2               | 46                | 0.74                        | 117                                | 0.81                  | 0.13                    | 0.88                        |
| 2               | 47                | 0.74                        | 123                                | 0.80                  | 0.14                    | 0.88                        |
| 2               | 48                | 0.74                        | 115                                | 0.81                  | 0.13                    | 0.89                        |
| 2               | 49                | 0.75                        | 98                                 | 0.81                  | 0.14                    | 0.89                        |
| 2               | 50                | 0.73                        | 104                                | 0.80                  | 0.13                    | 0.88                        |
| 2               | 51                | 0.72                        | 94                                 | 0.79                  | 0.13                    | 0.87                        |
| 2               | 52                | 0.73                        | 97                                 | 0.80                  | 0.12                    | 0.88                        |
| 2               | 53                | 0.72                        | 115                                | 0.79                  | 0.13                    | 0.87                        |
| 2               | 54                | 0.72                        | 106                                | 0.80                  | 0.13                    | 0.87                        |
| 2               | 55                | 0.71                        | 427                                | 0.79                  | 0.14                    | 0.87                        |

*Continued on next page*

Table S3 – Continued from previous page

| <b>Fault No</b> | <b>Sample Bin</b> | <b>Fault Detection Rate</b> | <b>Optimal Feature Subset Size</b> | <b>Model Accuracy</b> | <b>False Alarm Rate</b> | <b>Area Under the Curve</b> |
|-----------------|-------------------|-----------------------------|------------------------------------|-----------------------|-------------------------|-----------------------------|
| 2               | 56                | 0.97                        | 7                                  | 0.51                  | 0.94                    | 0.95                        |
| 2               | 57                | 0.72                        | 390                                | 0.79                  | 0.14                    | 0.87                        |
| 2               | 58                | 0.97                        | 1613                               | 0.51                  | 0.95                    | 0.56                        |
| 2               | 59                | 0.73                        | 102                                | 0.81                  | 0.11                    | 0.89                        |
| 2               | 60                | 0.95                        | 1450                               | 0.52                  | 0.91                    | 0.60                        |
| 2               | 61                | 0.72                        | 5                                  | 0.86                  | 0.01                    | 0.93                        |
| 2               | 62                | 0.73                        | 15                                 | 0.86                  | 0.00                    | 0.94                        |
| 2               | 63                | 0.72                        | 107                                | 0.81                  | 0.10                    | 0.89                        |
| 2               | 64                | 0.74                        | 13                                 | 0.87                  | 0.00                    | 0.94                        |
| 2               | 65                | 0.77                        | 287                                | 0.83                  | 0.12                    | 0.90                        |
| 2               | 66                | 0.75                        | 2                                  | 0.87                  | 0.00                    | 0.95                        |
| 2               | 67                | 0.76                        | 6                                  | 0.88                  | 0.00                    | 0.96                        |
| 2               | 68                | 0.75                        | 3                                  | 0.88                  | 0.00                    | 0.96                        |
| 2               | 69                | 0.75                        | 6                                  | 0.87                  | 0.00                    | 0.96                        |
| 2               | 70                | 0.78                        | 338                                | 0.84                  | 0.10                    | 0.92                        |
| 2               | 71                | 0.77                        | 396                                | 0.83                  | 0.11                    | 0.91                        |
| 2               | 72                | 0.98                        | 1222                               | 0.52                  | 0.94                    | 0.60                        |
| 2               | 73                | 0.77                        | 274                                | 0.82                  | 0.13                    | 0.90                        |
| 2               | 74                | 0.77                        | 505                                | 0.83                  | 0.10                    | 0.91                        |
| 2               | 75                | 0.96                        | 1503                               | 0.52                  | 0.91                    | 0.61                        |
| 2               | 76                | 0.97                        | 1585                               | 0.51                  | 0.95                    | 0.58                        |
| 2               | 77                | 0.99                        | 1152                               | 0.51                  | 0.98                    | 0.58                        |
| 2               | 78                | 0.78                        | 355                                | 0.83                  | 0.12                    | 0.92                        |
| 2               | 79                | 0.76                        | 29                                 | 0.88                  | 0.00                    | 0.98                        |
| 2               | 80                | 0.97                        | 1594                               | 0.51                  | 0.95                    | 0.58                        |
| 2               | 81                | 0.77                        | 3                                  | 0.89                  | 0.00                    | 0.98                        |

*Continued on next page*

Table S3 – *Continued from previous page*

| <b>Fault No</b> | <b>Sample Bin</b> | <b>Fault Detection Rate</b> | <b>Optimal Feature Subset Size</b> | <b>Model Accuracy</b> | <b>False Alarm Rate</b> | <b>Area Under the Curve</b> |
|-----------------|-------------------|-----------------------------|------------------------------------|-----------------------|-------------------------|-----------------------------|
| 2               | 82                | 0.78                        | 250                                | 0.84                  | 0.11                    | 0.91                        |
| 2               | 83                | 0.75                        | 23                                 | 0.88                  | 0.00                    | 0.98                        |
| 2               | 84                | 0.79                        | 356                                | 0.85                  | 0.10                    | 0.93                        |
| 2               | 85                | 0.76                        | 3                                  | 0.88                  | 0.00                    | 0.98                        |
| 2               | 86                | 0.78                        | 5                                  | 0.89                  | 0.00                    | 0.99                        |
| 2               | 87                | 0.97                        | 1511                               | 0.53                  | 0.91                    | 0.62                        |
| 2               | 88                | 0.97                        | 1783                               | 0.53                  | 0.92                    | 0.62                        |
| 2               | 89                | 0.77                        | 5                                  | 0.89                  | 0.00                    | 0.99                        |
| 2               | 90                | 0.97                        | 1549                               | 0.52                  | 0.93                    | 0.63                        |
| 2               | 91                | 0.76                        | 29                                 | 0.88                  | 0.00                    | 0.98                        |
| 2               | 92                | 0.76                        | 4                                  | 0.88                  | 0.00                    | 0.98                        |
| 2               | 93                | 0.77                        | 5                                  | 0.89                  | 0.00                    | 0.99                        |
| 2               | 94                | 0.76                        | 32                                 | 0.88                  | 0.00                    | 0.98                        |
| 2               | 95                | 0.96                        | 1877                               | 0.54                  | 0.88                    | 0.62                        |
| 2               | 96                | 0.97                        | 2011                               | 0.52                  | 0.92                    | 0.62                        |
| 2               | 97                | 0.78                        | 339                                | 0.84                  | 0.11                    | 0.92                        |
| 2               | 98                | 0.75                        | 2                                  | 0.88                  | 0.00                    | 0.98                        |
| 2               | 99                | 0.76                        | 5                                  | 0.88                  | 0.00                    | 0.98                        |
| 2               | 100               | 0.77                        | 4                                  | 0.89                  | 0.00                    | 0.99                        |
| 2               | 101               | 0.98                        | 2121                               | 0.51                  | 0.95                    | 0.57                        |
| 2               | 102               | 0.75                        | 3                                  | 0.88                  | 0.00                    | 0.97                        |
| 2               | 103               | 0.77                        | 5                                  | 0.88                  | 0.00                    | 0.99                        |
| 2               | 104               | 0.97                        | 2047                               | 0.51                  | 0.95                    | 0.58                        |
| 2               | 105               | 0.98                        | 1787                               | 0.52                  | 0.93                    | 0.63                        |
| 2               | 106               | 0.79                        | 6                                  | 0.89                  | 0.00                    | 0.99                        |
| 2               | 107               | 0.79                        | 7                                  | 0.89                  | 0.00                    | 0.99                        |

*Continued on next page*

Table S3 – Continued from previous page

| <b>Fault No</b> | <b>Sample Bin</b> | <b>Fault Detection Rate</b> | <b>Optimal Feature Subset Size</b> | <b>Model Accuracy</b> | <b>False Alarm Rate</b> | <b>Area Under the Curve</b> |
|-----------------|-------------------|-----------------------------|------------------------------------|-----------------------|-------------------------|-----------------------------|
| 2               | 108               | 0.95                        | 1668                               | 0.53                  | 0.90                    | 0.62                        |
| 2               | 109               | 0.79                        | 376                                | 0.86                  | 0.08                    | 0.93                        |
| 2               | 110               | 0.98                        | 1903                               | 0.51                  | 0.96                    | 0.59                        |
| 2               | 111               | 0.97                        | 1986                               | 0.52                  | 0.94                    | 0.62                        |
| 2               | 112               | 0.97                        | 1511                               | 0.52                  | 0.94                    | 0.63                        |
| 2               | 113               | 0.79                        | 9                                  | 0.89                  | 0.00                    | 1.00                        |
| 2               | 114               | 0.95                        | 2278                               | 0.52                  | 0.91                    | 0.62                        |
| 2               | 115               | 0.99                        | 2104                               | 0.52                  | 0.95                    | 0.63                        |
| 2               | 116               | 0.95                        | 1685                               | 0.53                  | 0.89                    | 0.64                        |
| 2               | 117               | 0.95                        | 1792                               | 0.53                  | 0.90                    | 0.63                        |
| 2               | 118               | 0.79                        | 17                                 | 0.89                  | 0.00                    | 1.00                        |
| 2               | 119               | 0.80                        | 543                                | 0.86                  | 0.07                    | 0.94                        |
| 2               | 120               | 0.98                        | 2146                               | 0.53                  | 0.92                    | 0.62                        |
| 3               | 2                 | 1.00                        | 20                                 | 1.00                  | 0.00                    | 1.00                        |
| 3               | 3                 | 0.98                        | 29                                 | 0.98                  | 0.01                    | 1.00                        |
| 3               | 4                 | 0.95                        | 59                                 | 0.97                  | 0.01                    | 0.99                        |
| 3               | 5                 | 0.99                        | 3                                  | 0.99                  | 0.00                    | 1.00                        |
| 3               | 6                 | 0.94                        | 36                                 | 0.96                  | 0.01                    | 1.00                        |
| 3               | 7                 | 0.93                        | 52                                 | 0.96                  | 0.02                    | 0.99                        |
| 3               | 8                 | 0.92                        | 42                                 | 0.95                  | 0.02                    | 0.99                        |
| 3               | 9                 | 0.92                        | 4                                  | 0.96                  | 0.00                    | 0.99                        |
| 3               | 10                | 0.95                        | 66                                 | 0.96                  | 0.02                    | 0.99                        |
| 3               | 11                | 0.94                        | 44                                 | 0.96                  | 0.02                    | 0.99                        |
| 3               | 12                | 0.98                        | 56                                 | 0.98                  | 0.02                    | 1.00                        |
| 3               | 13                | 0.95                        | 60                                 | 0.97                  | 0.01                    | 0.99                        |
| 3               | 14                | 0.95                        | 90                                 | 0.97                  | 0.02                    | 1.00                        |

*Continued on next page*

Table S3 – Continued from previous page

| <b>Fault No</b> | <b>Sample Bin</b> | <b>Fault Detection Rate</b> | <b>Optimal Feature Subset Size</b> | <b>Model Accuracy</b> | <b>False Alarm Rate</b> | <b>Area Under the Curve</b> |
|-----------------|-------------------|-----------------------------|------------------------------------|-----------------------|-------------------------|-----------------------------|
| 3               | 15                | 0.96                        | 84                                 | 0.97                  | 0.01                    | 1.00                        |
| 3               | 16                | 0.90                        | 107                                | 0.94                  | 0.02                    | 0.99                        |
| 3               | 17                | 0.94                        | 63                                 | 0.96                  | 0.01                    | 1.00                        |
| 3               | 18                | 0.91                        | 139                                | 0.94                  | 0.02                    | 0.99                        |
| 3               | 19                | 0.92                        | 10                                 | 0.96                  | 0.00                    | 0.99                        |
| 3               | 20                | 0.95                        | 7                                  | 0.97                  | 0.00                    | 1.00                        |
| 3               | 21                | 0.94                        | 11                                 | 0.97                  | 0.00                    | 1.00                        |
| 3               | 22                | 0.94                        | 6                                  | 0.97                  | 0.00                    | 0.99                        |
| 3               | 23                | 0.94                        | 12                                 | 0.97                  | 0.00                    | 0.99                        |
| 3               | 24                | 0.93                        | 87                                 | 0.96                  | 0.01                    | 1.00                        |
| 3               | 25                | 0.95                        | 119                                | 0.97                  | 0.01                    | 0.99                        |
| 3               | 26                | 0.96                        | 176                                | 0.97                  | 0.02                    | 1.00                        |
| 3               | 27                | 0.94                        | 97                                 | 0.97                  | 0.01                    | 0.99                        |
| 3               | 28                | 0.96                        | 93                                 | 0.98                  | 0.01                    | 1.00                        |
| 3               | 29                | 0.95                        | 73                                 | 0.98                  | 0.00                    | 1.00                        |
| 3               | 30                | 0.95                        | 11                                 | 0.97                  | 0.00                    | 0.99                        |
| 3               | 31                | 0.95                        | 20                                 | 0.98                  | 0.00                    | 0.99                        |
| 3               | 32                | 0.98                        | 3                                  | 0.99                  | 0.00                    | 1.00                        |
| 3               | 33                | 0.97                        | 7                                  | 0.98                  | 0.00                    | 1.00                        |
| 3               | 34                | 0.96                        | 201                                | 0.98                  | 0.01                    | 1.00                        |
| 3               | 35                | 0.98                        | 6                                  | 0.99                  | 0.00                    | 0.99                        |
| 3               | 36                | 0.98                        | 76                                 | 0.99                  | 0.00                    | 1.00                        |
| 3               | 37                | 0.96                        | 94                                 | 0.98                  | 0.00                    | 1.00                        |
| 3               | 38                | 0.95                        | 5                                  | 0.98                  | 0.00                    | 0.99                        |
| 3               | 39                | 0.97                        | 14                                 | 0.99                  | 0.00                    | 1.00                        |
| 3               | 40                | 0.97                        | 7                                  | 0.99                  | 0.00                    | 1.00                        |

*Continued on next page*

Table S3 – *Continued from previous page*

| <b>Fault No</b> | <b>Sample Bin</b> | <b>Fault Detection Rate</b> | <b>Optimal Feature Subset Size</b> | <b>Model Accuracy</b> | <b>False Alarm Rate</b> | <b>Area Under the Curve</b> |
|-----------------|-------------------|-----------------------------|------------------------------------|-----------------------|-------------------------|-----------------------------|
| 3               | 41                | 0.97                        | 4                                  | 0.98                  | 0.00                    | 1.00                        |
| 3               | 42                | 0.98                        | 4                                  | 0.99                  | 0.00                    | 1.00                        |
| 3               | 43                | 0.97                        | 19                                 | 0.99                  | 0.00                    | 1.00                        |
| 3               | 44                | 0.98                        | 11                                 | 0.99                  | 0.00                    | 1.00                        |
| 3               | 45                | 0.98                        | 10                                 | 0.99                  | 0.00                    | 1.00                        |
| 3               | 46                | 0.99                        | 10                                 | 0.99                  | 0.00                    | 1.00                        |
| 3               | 47                | 0.97                        | 9                                  | 0.99                  | 0.00                    | 0.99                        |
| 3               | 48                | 0.98                        | 18                                 | 0.99                  | 0.00                    | 1.00                        |
| 3               | 49                | 0.97                        | 15                                 | 0.98                  | 0.00                    | 0.99                        |
| 3               | 50                | 0.97                        | 27                                 | 0.99                  | 0.00                    | 1.00                        |
| 3               | 51                | 0.97                        | 18                                 | 0.98                  | 0.00                    | 1.00                        |
| 3               | 52                | 0.97                        | 22                                 | 0.98                  | 0.00                    | 1.00                        |
| 3               | 53                | 0.96                        | 9                                  | 0.98                  | 0.00                    | 1.00                        |
| 3               | 54                | 0.96                        | 15                                 | 0.98                  | 0.00                    | 0.99                        |
| 3               | 55                | 0.97                        | 24                                 | 0.98                  | 0.00                    | 0.99                        |
| 3               | 56                | 0.97                        | 11                                 | 0.98                  | 0.00                    | 1.00                        |
| 3               | 57                | 0.98                        | 9                                  | 0.99                  | 0.00                    | 1.00                        |
| 3               | 58                | 0.97                        | 21                                 | 0.98                  | 0.00                    | 1.00                        |
| 3               | 59                | 0.97                        | 17                                 | 0.98                  | 0.00                    | 1.00                        |
| 3               | 60                | 0.96                        | 20                                 | 0.98                  | 0.00                    | 1.00                        |
| 3               | 61                | 0.97                        | 8                                  | 0.98                  | 0.00                    | 1.00                        |
| 3               | 62                | 0.97                        | 8                                  | 0.99                  | 0.00                    | 1.00                        |
| 3               | 63                | 0.98                        | 9                                  | 0.99                  | 0.00                    | 1.00                        |
| 3               | 64                | 0.98                        | 10                                 | 0.99                  | 0.00                    | 1.00                        |
| 3               | 65                | 0.97                        | 21                                 | 0.99                  | 0.00                    | 1.00                        |
| 3               | 66                | 0.98                        | 12                                 | 0.99                  | 0.00                    | 0.99                        |

*Continued on next page*

Table S3 – Continued from previous page

| <b>Fault No</b> | <b>Sample Bin</b> | <b>Fault Detection Rate</b> | <b>Optimal Feature Subset Size</b> | <b>Model Accuracy</b> | <b>False Alarm Rate</b> | <b>Area Under the Curve</b> |
|-----------------|-------------------|-----------------------------|------------------------------------|-----------------------|-------------------------|-----------------------------|
| 3               | 67                | 0.98                        | 18                                 | 0.99                  | 0.00                    | 1.00                        |
| 3               | 68                | 0.97                        | 7                                  | 0.99                  | 0.00                    | 0.99                        |
| 3               | 69                | 0.98                        | 21                                 | 0.99                  | 0.00                    | 1.00                        |
| 3               | 70                | 0.97                        | 18                                 | 0.99                  | 0.00                    | 1.00                        |
| 3               | 71                | 0.97                        | 22                                 | 0.99                  | 0.00                    | 1.00                        |
| 3               | 72                | 0.97                        | 25                                 | 0.98                  | 0.00                    | 1.00                        |
| 3               | 73                | 0.97                        | 23                                 | 0.99                  | 0.00                    | 1.00                        |
| 3               | 74                | 0.98                        | 24                                 | 0.99                  | 0.00                    | 1.00                        |
| 3               | 75                | 0.99                        | 4                                  | 0.99                  | 0.00                    | 1.00                        |
| 3               | 76                | 0.98                        | 19                                 | 0.99                  | 0.00                    | 1.00                        |
| 3               | 77                | 0.99                        | 18                                 | 0.99                  | 0.00                    | 1.00                        |
| 3               | 78                | 0.98                        | 20                                 | 0.99                  | 0.00                    | 1.00                        |
| 3               | 79                | 0.99                        | 6                                  | 0.99                  | 0.00                    | 1.00                        |
| 3               | 80                | 0.97                        | 16                                 | 0.99                  | 0.00                    | 1.00                        |
| 3               | 81                | 0.97                        | 25                                 | 0.99                  | 0.00                    | 1.00                        |
| 3               | 82                | 0.98                        | 5                                  | 0.99                  | 0.00                    | 1.00                        |
| 3               | 83                | 0.98                        | 19                                 | 0.99                  | 0.00                    | 1.00                        |
| 3               | 84                | 0.99                        | 6                                  | 0.99                  | 0.00                    | 1.00                        |
| 3               | 85                | 0.97                        | 12                                 | 0.99                  | 0.00                    | 1.00                        |
| 3               | 86                | 0.98                        | 5                                  | 0.99                  | 0.00                    | 1.00                        |
| 3               | 87                | 0.98                        | 6                                  | 0.99                  | 0.00                    | 1.00                        |
| 3               | 88                | 0.99                        | 4                                  | 0.99                  | 0.00                    | 1.00                        |
| 3               | 89                | 0.99                        | 20                                 | 0.99                  | 0.00                    | 1.00                        |
| 3               | 90                | 0.97                        | 9                                  | 0.99                  | 0.00                    | 1.00                        |
| 3               | 91                | 0.97                        | 27                                 | 0.98                  | 0.00                    | 1.00                        |
| 3               | 92                | 0.99                        | 5                                  | 0.99                  | 0.00                    | 1.00                        |

*Continued on next page*

Table S3 – *Continued from previous page*

| <b>Fault No</b> | <b>Sample Bin</b> | <b>Fault Detection Rate</b> | <b>Optimal Feature Subset Size</b> | <b>Model Accuracy</b> | <b>False Alarm Rate</b> | <b>Area Under the Curve</b> |
|-----------------|-------------------|-----------------------------|------------------------------------|-----------------------|-------------------------|-----------------------------|
| 3               | 93                | 0.98                        | 6                                  | 0.99                  | 0.00                    | 1.00                        |
| 3               | 94                | 0.98                        | 4                                  | 0.99                  | 0.00                    | 1.00                        |
| 3               | 95                | 0.98                        | 18                                 | 0.99                  | 0.00                    | 1.00                        |
| 3               | 96                | 0.99                        | 5                                  | 0.99                  | 0.00                    | 1.00                        |
| 3               | 97                | 0.97                        | 29                                 | 0.99                  | 0.00                    | 1.00                        |
| 3               | 98                | 0.98                        | 4                                  | 0.99                  | 0.00                    | 1.00                        |
| 3               | 99                | 0.98                        | 5                                  | 0.99                  | 0.00                    | 1.00                        |
| 3               | 100               | 0.98                        | 5                                  | 0.99                  | 0.00                    | 1.00                        |
| 3               | 101               | 0.98                        | 8                                  | 0.99                  | 0.00                    | 1.00                        |
| 3               | 102               | 0.99                        | 8                                  | 0.99                  | 0.00                    | 1.00                        |
| 3               | 103               | 0.99                        | 5                                  | 0.99                  | 0.00                    | 1.00                        |
| 3               | 104               | 0.99                        | 5                                  | 0.99                  | 0.00                    | 1.00                        |
| 3               | 105               | 0.98                        | 21                                 | 0.99                  | 0.00                    | 1.00                        |
| 3               | 106               | 0.98                        | 4                                  | 0.99                  | 0.00                    | 1.00                        |
| 3               | 107               | 0.99                        | 10                                 | 0.99                  | 0.00                    | 1.00                        |
| 3               | 108               | 1.00                        | 7                                  | 1.00                  | 0.00                    | 1.00                        |
| 3               | 109               | 0.99                        | 13                                 | 1.00                  | 0.00                    | 1.00                        |
| 3               | 110               | 0.99                        | 15                                 | 1.00                  | 0.00                    | 1.00                        |
| 3               | 111               | 0.99                        | 12                                 | 1.00                  | 0.00                    | 1.00                        |
| 3               | 112               | 1.00                        | 11                                 | 1.00                  | 0.00                    | 1.00                        |
| 3               | 113               | 1.00                        | 8                                  | 1.00                  | 0.00                    | 1.00                        |
| 3               | 114               | 1.00                        | 14                                 | 1.00                  | 0.00                    | 1.00                        |
| 3               | 115               | 1.00                        | 17                                 | 1.00                  | 0.00                    | 1.00                        |
| 3               | 116               | 1.00                        | 16                                 | 1.00                  | 0.00                    | 1.00                        |
| 3               | 117               | 1.00                        | 14                                 | 1.00                  | 0.00                    | 1.00                        |
| 3               | 118               | 1.00                        | 11                                 | 1.00                  | 0.00                    | 1.00                        |

*Continued on next page*



Table S3 – *Continued from previous page*

| <b>Fault No</b> | <b>Sample Bin</b> | <b>Fault Detection Rate</b> | <b>Optimal Feature Subset Size</b> | <b>Model Accuracy</b> | <b>False Alarm Rate</b> | <b>Area Under the Curve</b> |
|-----------------|-------------------|-----------------------------|------------------------------------|-----------------------|-------------------------|-----------------------------|
| 3               | 119               | 1.00                        | 23                                 | 1.00                  | 0.00                    | 1.00                        |
| 3               | 120               | 1.00                        | 6                                  | 1.00                  | 0.00                    | 1.00                        |
| 4               | 2                 | 0.76                        | 49                                 | 0.79                  | 0.18                    | 0.87                        |
| 4               | 3                 | 0.78                        | 49                                 | 0.79                  | 0.20                    | 0.87                        |
| 4               | 4                 | 0.83                        | 18                                 | 0.79                  | 0.24                    | 0.86                        |
| 4               | 5                 | 0.72                        | 100                                | 0.72                  | 0.28                    | 0.81                        |
| 4               | 6                 | 0.78                        | 56                                 | 0.78                  | 0.23                    | 0.86                        |
| 4               | 7                 | 0.84                        | 43                                 | 0.84                  | 0.17                    | 0.91                        |
| 4               | 8                 | 0.90                        | 65                                 | 0.88                  | 0.13                    | 0.95                        |
| 4               | 9                 | 0.88                        | 58                                 | 0.88                  | 0.13                    | 0.95                        |
| 4               | 10                | 0.88                        | 89                                 | 0.87                  | 0.14                    | 0.94                        |
| 4               | 11                | 0.89                        | 101                                | 0.90                  | 0.09                    | 0.97                        |
| 4               | 12                | 0.88                        | 152                                | 0.88                  | 0.12                    | 0.95                        |
| 4               | 13                | 0.86                        | 96                                 | 0.87                  | 0.12                    | 0.94                        |
| 4               | 14                | 0.89                        | 83                                 | 0.91                  | 0.07                    | 0.97                        |
| 4               | 15                | 0.90                        | 37                                 | 0.92                  | 0.05                    | 0.98                        |
| 4               | 16                | 0.91                        | 136                                | 0.93                  | 0.04                    | 0.98                        |
| 4               | 17                | 0.91                        | 126                                | 0.94                  | 0.03                    | 0.99                        |
| 4               | 18                | 0.92                        | 63                                 | 0.95                  | 0.02                    | 0.99                        |
| 4               | 19                | 0.91                        | 199                                | 0.93                  | 0.04                    | 0.98                        |
| 4               | 20                | 0.92                        | 140                                | 0.94                  | 0.04                    | 0.99                        |
| 4               | 21                | 0.89                        | 60                                 | 0.94                  | 0.01                    | 0.98                        |
| 4               | 22                | 0.91                        | 175                                | 0.93                  | 0.04                    | 0.98                        |
| 4               | 23                | 0.92                        | 97                                 | 0.94                  | 0.03                    | 0.99                        |
| 4               | 24                | 0.93                        | 131                                | 0.95                  | 0.02                    | 0.99                        |
| 4               | 25                | 0.95                        | 87                                 | 0.96                  | 0.02                    | 0.99                        |

*Continued on next page*

Table S3 – *Continued from previous page*

| <b>Fault No</b> | <b>Sample Bin</b> | <b>Fault Detection Rate</b> | <b>Optimal Feature Subset Size</b> | <b>Model Accuracy</b> | <b>False Alarm Rate</b> | <b>Area Under the Curve</b> |
|-----------------|-------------------|-----------------------------|------------------------------------|-----------------------|-------------------------|-----------------------------|
| 4               | 26                | 0.93                        | 159                                | 0.95                  | 0.02                    | 0.99                        |
| 4               | 27                | 0.89                        | 124                                | 0.93                  | 0.02                    | 0.99                        |
| 4               | 28                | 0.94                        | 168                                | 0.96                  | 0.02                    | 0.99                        |
| 4               | 29                | 0.94                        | 133                                | 0.96                  | 0.02                    | 0.99                        |
| 4               | 30                | 0.93                        | 159                                | 0.96                  | 0.02                    | 0.99                        |
| 4               | 31                | 0.89                        | 122                                | 0.94                  | 0.01                    | 0.99                        |
| 4               | 32                | 0.92                        | 89                                 | 0.95                  | 0.01                    | 0.99                        |
| 4               | 33                | 0.91                        | 193                                | 0.94                  | 0.02                    | 0.99                        |
| 4               | 34                | 0.89                        | 84                                 | 0.94                  | 0.01                    | 0.99                        |
| 4               | 35                | 0.91                        | 188                                | 0.95                  | 0.02                    | 0.99                        |
| 4               | 36                | 0.89                        | 173                                | 0.94                  | 0.01                    | 0.99                        |
| 4               | 37                | 0.92                        | 151                                | 0.95                  | 0.01                    | 0.99                        |
| 4               | 38                | 0.92                        | 95                                 | 0.95                  | 0.01                    | 0.99                        |
| 4               | 39                | 0.88                        | 96                                 | 0.94                  | 0.00                    | 0.99                        |
| 4               | 40                | 0.88                        | 176                                | 0.94                  | 0.01                    | 0.99                        |
| 4               | 41                | 0.88                        | 153                                | 0.94                  | 0.00                    | 0.98                        |
| 4               | 42                | 0.89                        | 246                                | 0.94                  | 0.02                    | 0.99                        |
| 4               | 43                | 0.90                        | 242                                | 0.94                  | 0.01                    | 0.99                        |
| 4               | 44                | 0.87                        | 192                                | 0.93                  | 0.01                    | 0.98                        |
| 4               | 45                | 0.88                        | 147                                | 0.93                  | 0.01                    | 0.99                        |
| 4               | 46                | 0.88                        | 184                                | 0.93                  | 0.01                    | 0.99                        |
| 4               | 47                | 0.90                        | 118                                | 0.95                  | 0.00                    | 0.99                        |
| 4               | 48                | 0.91                        | 159                                | 0.95                  | 0.01                    | 0.99                        |
| 4               | 49                | 0.90                        | 169                                | 0.95                  | 0.01                    | 0.99                        |
| 4               | 50                | 0.91                        | 213                                | 0.95                  | 0.01                    | 0.99                        |
| 4               | 51                | 0.89                        | 149                                | 0.94                  | 0.00                    | 0.99                        |

*Continued on next page*

Table S3 – *Continued from previous page*

| <b>Fault No</b> | <b>Sample Bin</b> | <b>Fault Detection Rate</b> | <b>Optimal Feature Subset Size</b> | <b>Model Accuracy</b> | <b>False Alarm Rate</b> | <b>Area Under the Curve</b> |
|-----------------|-------------------|-----------------------------|------------------------------------|-----------------------|-------------------------|-----------------------------|
| 4               | 52                | 0.88                        | 194                                | 0.94                  | 0.01                    | 0.98                        |
| 4               | 53                | 0.87                        | 132                                | 0.94                  | 0.00                    | 0.99                        |
| 4               | 54                | 0.87                        | 188                                | 0.93                  | 0.01                    | 0.98                        |
| 4               | 55                | 0.88                        | 232                                | 0.93                  | 0.01                    | 0.98                        |
| 4               | 56                | 0.88                        | 268                                | 0.93                  | 0.02                    | 0.98                        |
| 4               | 57                | 0.89                        | 199                                | 0.94                  | 0.01                    | 0.99                        |
| 4               | 58                | 0.89                        | 248                                | 0.94                  | 0.02                    | 0.98                        |
| 4               | 59                | 0.90                        | 197                                | 0.94                  | 0.01                    | 0.99                        |
| 4               | 60                | 0.89                        | 321                                | 0.94                  | 0.01                    | 0.99                        |
| 4               | 61                | 0.89                        | 146                                | 0.94                  | 0.01                    | 0.99                        |
| 4               | 62                | 0.88                        | 269                                | 0.93                  | 0.01                    | 0.98                        |
| 4               | 63                | 0.89                        | 316                                | 0.94                  | 0.02                    | 0.98                        |
| 4               | 64                | 0.91                        | 318                                | 0.95                  | 0.02                    | 0.99                        |
| 4               | 65                | 0.91                        | 270                                | 0.95                  | 0.02                    | 0.99                        |
| 4               | 66                | 0.89                        | 275                                | 0.94                  | 0.01                    | 0.99                        |
| 4               | 67                | 0.89                        | 220                                | 0.94                  | 0.01                    | 0.98                        |
| 4               | 68                | 0.90                        | 207                                | 0.95                  | 0.01                    | 0.99                        |
| 4               | 69                | 0.91                        | 277                                | 0.94                  | 0.02                    | 0.99                        |
| 4               | 70                | 0.88                        | 281                                | 0.94                  | 0.01                    | 0.99                        |
| 4               | 71                | 0.90                        | 480                                | 0.94                  | 0.02                    | 0.99                        |
| 4               | 72                | 0.91                        | 327                                | 0.94                  | 0.02                    | 0.98                        |
| 4               | 73                | 0.91                        | 476                                | 0.94                  | 0.03                    | 0.98                        |
| 4               | 74                | 0.90                        | 430                                | 0.93                  | 0.03                    | 0.98                        |
| 4               | 75                | 0.90                        | 266                                | 0.94                  | 0.02                    | 0.98                        |
| 4               | 76                | 0.90                        | 204                                | 0.94                  | 0.01                    | 0.99                        |
| 4               | 77                | 0.89                        | 339                                | 0.94                  | 0.01                    | 0.99                        |

*Continued on next page*

Table S3 – *Continued from previous page*

| <b>Fault No</b> | <b>Sample Bin</b> | <b>Fault Detection Rate</b> | <b>Optimal Feature Subset Size</b> | <b>Model Accuracy</b> | <b>False Alarm Rate</b> | <b>Area Under the Curve</b> |
|-----------------|-------------------|-----------------------------|------------------------------------|-----------------------|-------------------------|-----------------------------|
| 4               | 78                | 0.90                        | 233                                | 0.94                  | 0.02                    | 0.99                        |
| 4               | 79                | 0.90                        | 306                                | 0.94                  | 0.02                    | 0.98                        |
| 4               | 80                | 0.91                        | 405                                | 0.94                  | 0.02                    | 0.99                        |
| 4               | 81                | 0.89                        | 289                                | 0.94                  | 0.02                    | 0.98                        |
| 4               | 82                | 0.90                        | 329                                | 0.94                  | 0.02                    | 0.99                        |
| 4               | 83                | 0.89                        | 309                                | 0.94                  | 0.02                    | 0.98                        |
| 4               | 84                | 0.90                        | 510                                | 0.94                  | 0.02                    | 0.98                        |
| 4               | 85                | 0.89                        | 543                                | 0.93                  | 0.02                    | 0.98                        |
| 4               | 86                | 0.89                        | 214                                | 0.93                  | 0.02                    | 0.98                        |
| 4               | 87                | 0.90                        | 297                                | 0.94                  | 0.01                    | 0.98                        |
| 4               | 88                | 0.89                        | 397                                | 0.93                  | 0.02                    | 0.98                        |
| 4               | 89                | 0.89                        | 310                                | 0.94                  | 0.02                    | 0.98                        |
| 4               | 90                | 0.90                        | 328                                | 0.94                  | 0.02                    | 0.99                        |
| 4               | 91                | 0.89                        | 507                                | 0.93                  | 0.02                    | 0.98                        |
| 4               | 92                | 0.90                        | 429                                | 0.94                  | 0.02                    | 0.98                        |
| 4               | 93                | 0.90                        | 277                                | 0.94                  | 0.03                    | 0.98                        |
| 4               | 94                | 0.90                        | 569                                | 0.94                  | 0.02                    | 0.98                        |
| 4               | 95                | 0.89                        | 203                                | 0.94                  | 0.01                    | 0.99                        |
| 4               | 96                | 0.89                        | 487                                | 0.93                  | 0.02                    | 0.98                        |
| 4               | 97                | 0.89                        | 356                                | 0.93                  | 0.03                    | 0.98                        |
| 4               | 98                | 0.90                        | 407                                | 0.94                  | 0.02                    | 0.98                        |
| 4               | 99                | 0.89                        | 435                                | 0.93                  | 0.02                    | 0.98                        |
| 4               | 100               | 0.89                        | 384                                | 0.93                  | 0.02                    | 0.98                        |
| 4               | 101               | 0.89                        | 470                                | 0.93                  | 0.02                    | 0.98                        |
| 4               | 102               | 0.89                        | 400                                | 0.94                  | 0.02                    | 0.98                        |
| 4               | 103               | 0.89                        | 393                                | 0.94                  | 0.02                    | 0.99                        |

*Continued on next page*

Table S3 – *Continued from previous page*

| <b>Fault No</b> | <b>Sample Bin</b> | <b>Fault Detection Rate</b> | <b>Optimal Feature Subset Size</b> | <b>Model Accuracy</b> | <b>False Alarm Rate</b> | <b>Area Under the Curve</b> |
|-----------------|-------------------|-----------------------------|------------------------------------|-----------------------|-------------------------|-----------------------------|
| 4               | 104               | 0.90                        | 386                                | 0.94                  | 0.02                    | 0.98                        |
| 4               | 105               | 0.89                        | 463                                | 0.94                  | 0.02                    | 0.99                        |
| 4               | 106               | 0.90                        | 555                                | 0.94                  | 0.02                    | 0.99                        |
| 4               | 107               | 0.91                        | 407                                | 0.95                  | 0.01                    | 0.99                        |
| 4               | 108               | 0.90                        | 419                                | 0.94                  | 0.02                    | 0.99                        |
| 4               | 109               | 0.92                        | 472                                | 0.95                  | 0.02                    | 0.99                        |
| 4               | 110               | 0.91                        | 301                                | 0.95                  | 0.01                    | 0.99                        |
| 4               | 111               | 0.91                        | 346                                | 0.95                  | 0.02                    | 0.99                        |
| 4               | 112               | 0.91                        | 619                                | 0.95                  | 0.01                    | 0.99                        |
| 4               | 113               | 0.91                        | 362                                | 0.95                  | 0.02                    | 0.99                        |
| 4               | 114               | 0.91                        | 625                                | 0.94                  | 0.02                    | 0.99                        |
| 4               | 115               | 0.92                        | 566                                | 0.95                  | 0.02                    | 0.99                        |
| 4               | 116               | 0.91                        | 599                                | 0.95                  | 0.01                    | 0.99                        |
| 4               | 117               | 0.92                        | 528                                | 0.95                  | 0.01                    | 0.99                        |
| 4               | 118               | 0.91                        | 649                                | 0.95                  | 0.01                    | 0.99                        |
| 4               | 119               | 0.92                        | 430                                | 0.95                  | 0.01                    | 0.99                        |
| 4               | 120               | 0.91                        | 565                                | 0.95                  | 0.01                    | 0.99                        |
| 5               | 2                 | 0.85                        | 88                                 | 0.68                  | 0.61                    | 0.70                        |
| 5               | 3                 | 0.72                        | 6                                  | 0.50                  | 0.74                    | 0.91                        |
| 5               | 4                 | 0.87                        | 13                                 | 0.51                  | 0.85                    | 0.93                        |
| 5               | 5                 | 0.77                        | 19                                 | 0.50                  | 0.76                    | 0.84                        |
| 5               | 6                 | 0.80                        | 10                                 | 0.51                  | 0.80                    | 0.93                        |
| 5               | 7                 | 0.82                        | 49                                 | 0.79                  | 0.24                    | 0.85                        |
| 5               | 8                 | 0.72                        | 129                                | 0.68                  | 0.37                    | 0.74                        |
| 5               | 9                 | 0.70                        | 10                                 | 0.64                  | 0.42                    | 0.69                        |
| 5               | 10                | 0.73                        | 66                                 | 0.70                  | 0.33                    | 0.77                        |

*Continued on next page*

Table S3 – *Continued from previous page*

| <b>Fault No</b> | <b>Sample Bin</b> | <b>Fault Detection Rate</b> | <b>Optimal Feature Subset Size</b> | <b>Model Accuracy</b> | <b>False Alarm Rate</b> | <b>Area Under the Curve</b> |
|-----------------|-------------------|-----------------------------|------------------------------------|-----------------------|-------------------------|-----------------------------|
| 5               | 11                | 0.77                        | 68                                 | 0.75                  | 0.27                    | 0.82                        |
| 5               | 12                | 0.70                        | 9                                  | 0.69                  | 0.33                    | 0.74                        |
| 5               | 13                | 0.75                        | 93                                 | 0.73                  | 0.28                    | 0.81                        |
| 5               | 14                | 0.74                        | 83                                 | 0.74                  | 0.26                    | 0.81                        |
| 5               | 15                | 0.62                        | 515                                | 0.55                  | 0.53                    | 0.54                        |
| 5               | 16                | 0.80                        | 106                                | 0.78                  | 0.25                    | 0.85                        |
| 5               | 17                | 0.81                        | 82                                 | 0.77                  | 0.26                    | 0.85                        |
| 5               | 18                | 0.79                        | 87                                 | 0.77                  | 0.25                    | 0.84                        |
| 5               | 19                | 0.74                        | 71                                 | 0.73                  | 0.28                    | 0.81                        |
| 5               | 20                | 0.77                        | 85                                 | 0.75                  | 0.27                    | 0.83                        |
| 5               | 21                | 0.83                        | 42                                 | 0.88                  | 0.08                    | 0.95                        |
| 5               | 22                | 0.86                        | 6                                  | 0.93                  | 0.00                    | 0.97                        |
| 5               | 23                | 0.81                        | 1                                  | 0.90                  | 0.00                    | 0.95                        |
| 5               | 24                | 0.82                        | 6                                  | 0.91                  | 0.00                    | 0.97                        |
| 5               | 25                | 0.84                        | 6                                  | 0.92                  | 0.00                    | 0.96                        |
| 5               | 26                | 0.83                        | 1                                  | 0.92                  | 0.00                    | 0.93                        |
| 5               | 27                | 0.84                        | 68                                 | 0.88                  | 0.08                    | 0.95                        |
| 5               | 28                | 0.85                        | 75                                 | 0.88                  | 0.08                    | 0.95                        |
| 5               | 29                | 0.82                        | 5                                  | 0.91                  | 0.00                    | 0.96                        |
| 5               | 30                | 0.83                        | 151                                | 0.87                  | 0.08                    | 0.95                        |
| 5               | 31                | 0.80                        | 215                                | 0.86                  | 0.07                    | 0.94                        |
| 5               | 32                | 0.74                        | 162                                | 0.84                  | 0.07                    | 0.93                        |
| 5               | 33                | 0.80                        | 217                                | 0.86                  | 0.09                    | 0.94                        |
| 5               | 34                | 0.79                        | 210                                | 0.85                  | 0.08                    | 0.93                        |
| 5               | 35                | 0.80                        | 292                                | 0.85                  | 0.09                    | 0.94                        |
| 5               | 36                | 0.79                        | 4                                  | 0.89                  | 0.00                    | 0.95                        |

*Continued on next page*

Table S3 – *Continued from previous page*

| <b>Fault No</b> | <b>Sample Bin</b> | <b>Fault Detection Rate</b> | <b>Optimal Feature Subset Size</b> | <b>Model Accuracy</b> | <b>False Alarm Rate</b> | <b>Area Under the Curve</b> |
|-----------------|-------------------|-----------------------------|------------------------------------|-----------------------|-------------------------|-----------------------------|
| 5               | 37                | 0.79                        | 5                                  | 0.89                  | 0.00                    | 0.94                        |
| 5               | 38                | 0.79                        | 164                                | 0.85                  | 0.10                    | 0.93                        |
| 5               | 39                | 0.81                        | 171                                | 0.86                  | 0.09                    | 0.94                        |
| 5               | 40                | 0.79                        | 253                                | 0.85                  | 0.09                    | 0.93                        |
| 5               | 41                | 0.78                        | 351                                | 0.85                  | 0.09                    | 0.92                        |
| 5               | 42                | 0.79                        | 264                                | 0.84                  | 0.10                    | 0.93                        |
| 5               | 43                | 0.73                        | 204                                | 0.83                  | 0.07                    | 0.91                        |
| 5               | 44                | 0.78                        | 342                                | 0.84                  | 0.09                    | 0.93                        |
| 5               | 45                | 0.77                        | 330                                | 0.84                  | 0.09                    | 0.92                        |
| 5               | 46                | 0.79                        | 380                                | 0.86                  | 0.07                    | 0.94                        |
| 5               | 47                | 0.79                        | 326                                | 0.86                  | 0.08                    | 0.93                        |
| 5               | 48                | 0.80                        | 352                                | 0.86                  | 0.07                    | 0.93                        |
| 5               | 49                | 0.79                        | 396                                | 0.86                  | 0.07                    | 0.93                        |
| 5               | 50                | 0.78                        | 365                                | 0.86                  | 0.06                    | 0.92                        |
| 5               | 51                | 0.77                        | 562                                | 0.85                  | 0.07                    | 0.93                        |
| 5               | 52                | 0.77                        | 387                                | 0.84                  | 0.08                    | 0.92                        |
| 5               | 53                | 0.78                        | 507                                | 0.86                  | 0.07                    | 0.93                        |
| 5               | 54                | 0.77                        | 444                                | 0.85                  | 0.07                    | 0.92                        |
| 5               | 55                | 0.78                        | 379                                | 0.86                  | 0.07                    | 0.93                        |
| 5               | 56                | 0.78                        | 432                                | 0.85                  | 0.07                    | 0.92                        |
| 5               | 57                | 0.77                        | 584                                | 0.85                  | 0.07                    | 0.93                        |
| 5               | 58                | 0.78                        | 507                                | 0.85                  | 0.07                    | 0.93                        |
| 5               | 59                | 0.78                        | 582                                | 0.86                  | 0.06                    | 0.94                        |
| 5               | 60                | 0.79                        | 582                                | 0.86                  | 0.06                    | 0.94                        |
| 5               | 61                | 0.82                        | 380                                | 0.87                  | 0.08                    | 0.94                        |
| 5               | 62                | 0.81                        | 405                                | 0.87                  | 0.08                    | 0.94                        |

*Continued on next page*

Table S3 – *Continued from previous page*

| <b>Fault No</b> | <b>Sample Bin</b> | <b>Fault Detection Rate</b> | <b>Optimal Feature Subset Size</b> | <b>Model Accuracy</b> | <b>False Alarm Rate</b> | <b>Area Under the Curve</b> |
|-----------------|-------------------|-----------------------------|------------------------------------|-----------------------|-------------------------|-----------------------------|
| 5               | 63                | 0.80                        | 517                                | 0.88                  | 0.05                    | 0.95                        |
| 5               | 64                | 0.79                        | 542                                | 0.87                  | 0.05                    | 0.95                        |
| 5               | 65                | 0.81                        | 481                                | 0.87                  | 0.07                    | 0.94                        |
| 5               | 66                | 0.78                        | 730                                | 0.86                  | 0.05                    | 0.94                        |
| 5               | 67                | 0.77                        | 639                                | 0.85                  | 0.06                    | 0.93                        |
| 5               | 68                | 0.77                        | 716                                | 0.86                  | 0.05                    | 0.94                        |
| 5               | 69                | 0.78                        | 593                                | 0.86                  | 0.05                    | 0.94                        |
| 5               | 70                | 0.77                        | 595                                | 0.85                  | 0.06                    | 0.93                        |
| 5               | 71                | 0.76                        | 766                                | 0.85                  | 0.06                    | 0.94                        |
| 5               | 72                | 0.77                        | 727                                | 0.86                  | 0.05                    | 0.93                        |
| 5               | 73                | 0.76                        | 748                                | 0.85                  | 0.06                    | 0.93                        |
| 5               | 74                | 0.77                        | 700                                | 0.86                  | 0.06                    | 0.94                        |
| 5               | 75                | 0.77                        | 651                                | 0.86                  | 0.05                    | 0.94                        |
| 5               | 76                | 0.76                        | 810                                | 0.85                  | 0.05                    | 0.93                        |
| 5               | 77                | 0.76                        | 725                                | 0.86                  | 0.05                    | 0.93                        |
| 5               | 78                | 0.76                        | 726                                | 0.85                  | 0.05                    | 0.93                        |
| 5               | 79                | 0.76                        | 707                                | 0.85                  | 0.06                    | 0.93                        |
| 5               | 80                | 0.77                        | 803                                | 0.85                  | 0.06                    | 0.93                        |
| 5               | 81                | 0.76                        | 908                                | 0.86                  | 0.05                    | 0.94                        |
| 5               | 82                | 0.78                        | 855                                | 0.86                  | 0.05                    | 0.94                        |
| 5               | 83                | 0.77                        | 856                                | 0.86                  | 0.05                    | 0.94                        |
| 5               | 84                | 0.78                        | 822                                | 0.87                  | 0.04                    | 0.94                        |
| 5               | 85                | 0.77                        | 880                                | 0.86                  | 0.04                    | 0.94                        |
| 5               | 86                | 0.78                        | 892                                | 0.87                  | 0.04                    | 0.95                        |
| 5               | 87                | 0.78                        | 954                                | 0.87                  | 0.04                    | 0.95                        |
| 5               | 88                | 0.80                        | 960                                | 0.88                  | 0.03                    | 0.95                        |

*Continued on next page*



Table S3 – *Continued from previous page*

| <b>Fault No</b> | <b>Sample Bin</b> | <b>Fault Detection Rate</b> | <b>Optimal Feature Subset Size</b> | <b>Model Accuracy</b> | <b>False Alarm Rate</b> | <b>Area Under the Curve</b> |
|-----------------|-------------------|-----------------------------|------------------------------------|-----------------------|-------------------------|-----------------------------|
| 5               | 89                | 0.78                        | 913                                | 0.87                  | 0.03                    | 0.95                        |
| 5               | 90                | 0.79                        | 991                                | 0.88                  | 0.03                    | 0.96                        |
| 5               | 91                | 0.80                        | 960                                | 0.89                  | 0.02                    | 0.96                        |
| 5               | 92                | 0.81                        | 5                                  | 0.90                  | 0.00                    | 0.92                        |
| 5               | 93                | 0.81                        | 2                                  | 0.90                  | 0.00                    | 0.91                        |
| 5               | 94                | 0.84                        | 875                                | 0.90                  | 0.04                    | 0.96                        |
| 5               | 95                | 0.84                        | 2                                  | 0.92                  | 0.00                    | 0.93                        |
| 5               | 96                | 0.85                        | 2                                  | 0.92                  | 0.00                    | 0.94                        |
| 5               | 97                | 0.85                        | 4                                  | 0.93                  | 0.00                    | 0.94                        |
| 5               | 98                | 0.87                        | 5                                  | 0.93                  | 0.00                    | 0.95                        |
| 5               | 99                | 0.87                        | 4                                  | 0.94                  | 0.00                    | 0.95                        |
| 5               | 100               | 0.89                        | 2                                  | 0.94                  | 0.00                    | 0.96                        |
| 5               | 101               | 0.90                        | 5                                  | 0.95                  | 0.00                    | 0.96                        |
| 5               | 102               | 0.91                        | 2                                  | 0.95                  | 0.00                    | 0.97                        |
| 5               | 103               | 0.92                        | 3                                  | 0.96                  | 0.00                    | 0.97                        |
| 5               | 104               | 0.93                        | 5                                  | 0.97                  | 0.00                    | 0.98                        |
| 5               | 105               | 0.94                        | 7                                  | 0.97                  | 0.00                    | 0.98                        |
| 5               | 106               | 0.95                        | 5                                  | 0.97                  | 0.00                    | 0.99                        |
| 5               | 107               | 0.96                        | 5                                  | 0.98                  | 0.00                    | 0.99                        |
| 5               | 108               | 0.97                        | 7                                  | 0.98                  | 0.00                    | 1.00                        |
| 5               | 109               | 0.98                        | 9                                  | 0.99                  | 0.00                    | 1.00                        |
| 5               | 110               | 0.98                        | 7                                  | 0.99                  | 0.00                    | 1.00                        |
| 5               | 111               | 0.99                        | 5                                  | 0.99                  | 0.00                    | 1.00                        |
| 5               | 112               | 0.99                        | 15                                 | 0.99                  | 0.00                    | 1.00                        |
| 5               | 113               | 0.99                        | 12                                 | 1.00                  | 0.00                    | 1.00                        |
| 5               | 114               | 0.99                        | 19                                 | 1.00                  | 0.00                    | 1.00                        |

*Continued on next page*

Table S3 – Continued from previous page

| <b>Fault No</b> | <b>Sample Bin</b> | <b>Fault Detection Rate</b> | <b>Optimal Feature Subset Size</b> | <b>Model Accuracy</b> | <b>False Alarm Rate</b> | <b>Area Under the Curve</b> |
|-----------------|-------------------|-----------------------------|------------------------------------|-----------------------|-------------------------|-----------------------------|
| 5               | 115               | 1.00                        | 16                                 | 1.00                  | 0.00                    | 1.00                        |
| 5               | 116               | 1.00                        | 23                                 | 1.00                  | 0.00                    | 1.00                        |
| 5               | 117               | 0.99                        | 24                                 | 1.00                  | 0.00                    | 1.00                        |
| 5               | 118               | 0.99                        | 28                                 | 1.00                  | 0.00                    | 1.00                        |
| 5               | 119               | 1.00                        | 1                                  | 1.00                  | 0.00                    | 1.00                        |
| 5               | 120               | 1.00                        | 1                                  | 1.00                  | 0.00                    | 1.00                        |
| 6               | 2                 | 0.90                        | 158                                | 0.55                  | 0.81                    | 0.52                        |
| 6               | 3                 | 0.79                        | 9                                  | 0.73                  | 0.32                    | 0.79                        |
| 6               | 4                 | 0.73                        | 64                                 | 0.72                  | 0.28                    | 0.81                        |
| 6               | 5                 | 0.73                        | 111                                | 0.71                  | 0.32                    | 0.77                        |
| 6               | 6                 | 0.86                        | 14                                 | 0.54                  | 0.77                    | 0.87                        |
| 6               | 7                 | 0.90                        | 1                                  | 0.52                  | 0.93                    | 0.99                        |
| 6               | 8                 | 0.69                        | 94                                 | 0.71                  | 0.26                    | 0.79                        |
| 6               | 9                 | 0.71                        | 68                                 | 0.73                  | 0.25                    | 0.80                        |
| 6               | 10                | 0.86                        | 11                                 | 0.53                  | 0.80                    | 0.87                        |
| 6               | 11                | 0.84                        | 11                                 | 0.51                  | 0.83                    | 0.85                        |
| 6               | 12                | 0.75                        | 28                                 | 0.55                  | 0.65                    | 0.64                        |
| 6               | 13                | 0.83                        | 12                                 | 0.52                  | 0.78                    | 0.81                        |
| 6               | 14                | 0.69                        | 299                                | 0.64                  | 0.41                    | 0.70                        |
| 6               | 15                | 0.71                        | 196                                | 0.74                  | 0.23                    | 0.82                        |
| 6               | 16                | 0.72                        | 79                                 | 0.74                  | 0.24                    | 0.83                        |
| 6               | 17                | 0.75                        | 126                                | 0.78                  | 0.20                    | 0.85                        |
| 6               | 18                | 0.87                        | 9                                  | 0.53                  | 0.82                    | 0.85                        |
| 6               | 19                | 0.76                        | 150                                | 0.77                  | 0.22                    | 0.85                        |
| 6               | 20                | 0.77                        | 104                                | 0.78                  | 0.21                    | 0.86                        |
| 6               | 21                | 0.77                        | 98                                 | 0.78                  | 0.20                    | 0.87                        |

*Continued on next page*

Table S3 – *Continued from previous page*

| <b>Fault No</b> | <b>Sample Bin</b> | <b>Fault Detection Rate</b> | <b>Optimal Feature Subset Size</b> | <b>Model Accuracy</b> | <b>False Alarm Rate</b> | <b>Area Under the Curve</b> |
|-----------------|-------------------|-----------------------------|------------------------------------|-----------------------|-------------------------|-----------------------------|
| 6               | 22                | 0.77                        | 91                                 | 0.79                  | 0.19                    | 0.88                        |
| 6               | 23                | 0.78                        | 120                                | 0.79                  | 0.20                    | 0.88                        |
| 6               | 24                | 0.72                        | 82                                 | 0.79                  | 0.14                    | 0.87                        |
| 6               | 25                | 0.77                        | 139                                | 0.80                  | 0.17                    | 0.88                        |
| 6               | 26                | 0.73                        | 138                                | 0.80                  | 0.14                    | 0.88                        |
| 6               | 27                | 0.78                        | 118                                | 0.81                  | 0.16                    | 0.88                        |
| 6               | 28                | 0.74                        | 71                                 | 0.81                  | 0.13                    | 0.88                        |
| 6               | 29                | 0.79                        | 99                                 | 0.82                  | 0.16                    | 0.89                        |
| 6               | 30                | 0.78                        | 107                                | 0.80                  | 0.17                    | 0.88                        |
| 6               | 31                | 0.77                        | 105                                | 0.80                  | 0.17                    | 0.89                        |
| 6               | 32                | 0.76                        | 116                                | 0.79                  | 0.17                    | 0.88                        |
| 6               | 33                | 0.76                        | 119                                | 0.78                  | 0.19                    | 0.88                        |
| 6               | 34                | 0.77                        | 125                                | 0.80                  | 0.17                    | 0.89                        |
| 6               | 35                | 0.78                        | 110                                | 0.81                  | 0.15                    | 0.89                        |
| 6               | 36                | 0.74                        | 121                                | 0.79                  | 0.16                    | 0.88                        |
| 6               | 37                | 0.77                        | 127                                | 0.80                  | 0.16                    | 0.89                        |
| 6               | 38                | 0.74                        | 115                                | 0.81                  | 0.13                    | 0.89                        |
| 6               | 39                | 0.78                        | 184                                | 0.82                  | 0.14                    | 0.90                        |
| 6               | 40                | 0.77                        | 188                                | 0.82                  | 0.14                    | 0.90                        |
| 6               | 41                | 0.78                        | 181                                | 0.82                  | 0.15                    | 0.90                        |
| 6               | 42                | 0.78                        | 152                                | 0.81                  | 0.16                    | 0.89                        |
| 6               | 43                | 0.77                        | 143                                | 0.81                  | 0.14                    | 0.89                        |
| 6               | 44                | 0.77                        | 138                                | 0.81                  | 0.14                    | 0.89                        |
| 6               | 45                | 0.78                        | 160                                | 0.83                  | 0.13                    | 0.90                        |
| 6               | 46                | 0.77                        | 296                                | 0.82                  | 0.14                    | 0.90                        |
| 6               | 47                | 0.77                        | 176                                | 0.83                  | 0.12                    | 0.90                        |

*Continued on next page*

Table S3 – *Continued from previous page*

| <b>Fault No</b> | <b>Sample Bin</b> | <b>Fault Detection Rate</b> | <b>Optimal Feature Subset Size</b> | <b>Model Accuracy</b> | <b>False Alarm Rate</b> | <b>Area Under the Curve</b> |
|-----------------|-------------------|-----------------------------|------------------------------------|-----------------------|-------------------------|-----------------------------|
| 6               | 48                | 0.78                        | 205                                | 0.82                  | 0.13                    | 0.90                        |
| 6               | 49                | 0.76                        | 223                                | 0.81                  | 0.15                    | 0.89                        |
| 6               | 50                | 0.77                        | 328                                | 0.82                  | 0.14                    | 0.89                        |
| 6               | 51                | 0.76                        | 169                                | 0.81                  | 0.14                    | 0.89                        |
| 6               | 52                | 0.77                        | 142                                | 0.82                  | 0.13                    | 0.89                        |
| 6               | 53                | 0.75                        | 150                                | 0.80                  | 0.15                    | 0.88                        |
| 6               | 54                | 0.77                        | 297                                | 0.81                  | 0.15                    | 0.89                        |
| 6               | 55                | 0.77                        | 303                                | 0.82                  | 0.13                    | 0.90                        |
| 6               | 56                | 0.77                        | 252                                | 0.81                  | 0.15                    | 0.89                        |
| 6               | 57                | 0.75                        | 274                                | 0.81                  | 0.14                    | 0.89                        |
| 6               | 58                | 0.76                        | 231                                | 0.81                  | 0.14                    | 0.90                        |
| 6               | 59                | 0.76                        | 339                                | 0.81                  | 0.13                    | 0.90                        |
| 6               | 60                | 0.77                        | 290                                | 0.81                  | 0.15                    | 0.89                        |
| 6               | 61                | 0.76                        | 320                                | 0.81                  | 0.14                    | 0.89                        |
| 6               | 62                | 0.76                        | 332                                | 0.81                  | 0.14                    | 0.90                        |
| 6               | 63                | 0.75                        | 299                                | 0.81                  | 0.12                    | 0.90                        |
| 6               | 64                | 0.76                        | 427                                | 0.81                  | 0.14                    | 0.89                        |
| 6               | 65                | 0.74                        | 138                                | 0.79                  | 0.15                    | 0.87                        |
| 6               | 66                | 0.72                        | 144                                | 0.78                  | 0.16                    | 0.87                        |
| 6               | 67                | 0.76                        | 269                                | 0.81                  | 0.15                    | 0.89                        |
| 6               | 68                | 0.72                        | 150                                | 0.79                  | 0.15                    | 0.87                        |
| 6               | 69                | 0.76                        | 325                                | 0.81                  | 0.14                    | 0.89                        |
| 6               | 70                | 0.72                        | 136                                | 0.78                  | 0.15                    | 0.86                        |
| 6               | 71                | 0.71                        | 349                                | 0.81                  | 0.10                    | 0.90                        |
| 6               | 72                | 0.71                        | 147                                | 0.77                  | 0.16                    | 0.86                        |
| 6               | 73                | 0.71                        | 702                                | 0.78                  | 0.14                    | 0.87                        |

*Continued on next page*

Table S3 – *Continued from previous page*

| <b>Fault No</b> | <b>Sample Bin</b> | <b>Fault Detection Rate</b> | <b>Optimal Feature Subset Size</b> | <b>Model Accuracy</b> | <b>False Alarm Rate</b> | <b>Area Under the Curve</b> |
|-----------------|-------------------|-----------------------------|------------------------------------|-----------------------|-------------------------|-----------------------------|
| 6               | 74                | 0.75                        | 572                                | 0.81                  | 0.14                    | 0.89                        |
| 6               | 75                | 0.71                        | 550                                | 0.78                  | 0.15                    | 0.86                        |
| 6               | 76                | 0.71                        | 599                                | 0.78                  | 0.14                    | 0.87                        |
| 6               | 77                | 0.76                        | 397                                | 0.81                  | 0.13                    | 0.89                        |
| 6               | 78                | 0.70                        | 146                                | 0.77                  | 0.15                    | 0.86                        |
| 6               | 79                | 0.76                        | 443                                | 0.81                  | 0.14                    | 0.89                        |
| 6               | 80                | 0.71                        | 444                                | 0.81                  | 0.10                    | 0.89                        |
| 6               | 81                | 0.76                        | 268                                | 0.81                  | 0.14                    | 0.89                        |
| 6               | 82                | 0.71                        | 668                                | 0.79                  | 0.14                    | 0.88                        |
| 6               | 83                | 0.76                        | 474                                | 0.82                  | 0.12                    | 0.90                        |
| 6               | 84                | 0.77                        | 307                                | 0.81                  | 0.14                    | 0.89                        |
| 6               | 85                | 0.71                        | 635                                | 0.78                  | 0.14                    | 0.87                        |
| 6               | 86                | 0.71                        | 812                                | 0.79                  | 0.13                    | 0.88                        |
| 6               | 87                | 0.71                        | 626                                | 0.78                  | 0.15                    | 0.86                        |
| 6               | 88                | 0.77                        | 322                                | 0.82                  | 0.14                    | 0.90                        |
| 6               | 89                | 0.77                        | 491                                | 0.82                  | 0.12                    | 0.90                        |
| 6               | 90                | 0.76                        | 528                                | 0.82                  | 0.13                    | 0.90                        |
| 6               | 91                | 0.71                        | 722                                | 0.79                  | 0.13                    | 0.88                        |
| 6               | 92                | 0.77                        | 542                                | 0.82                  | 0.13                    | 0.90                        |
| 6               | 93                | 0.71                        | 864                                | 0.79                  | 0.12                    | 0.88                        |
| 6               | 94                | 0.77                        | 551                                | 0.82                  | 0.13                    | 0.90                        |
| 6               | 95                | 0.71                        | 708                                | 0.79                  | 0.14                    | 0.87                        |
| 6               | 96                | 0.77                        | 597                                | 0.82                  | 0.12                    | 0.91                        |
| 6               | 97                | 0.71                        | 809                                | 0.79                  | 0.13                    | 0.88                        |
| 6               | 98                | 0.77                        | 582                                | 0.83                  | 0.12                    | 0.91                        |
| 6               | 99                | 0.74                        | 449                                | 0.81                  | 0.12                    | 0.89                        |

*Continued on next page*

Table S3 – *Continued from previous page*

| <b>Fault No</b> | <b>Sample Bin</b> | <b>Fault Detection Rate</b> | <b>Optimal Feature Subset Size</b> | <b>Model Accuracy</b> | <b>False Alarm Rate</b> | <b>Area Under the Curve</b> |
|-----------------|-------------------|-----------------------------|------------------------------------|-----------------------|-------------------------|-----------------------------|
| 6               | 100               | 0.71                        | 783                                | 0.79                  | 0.14                    | 0.88                        |
| 6               | 101               | 0.74                        | 431                                | 0.81                  | 0.13                    | 0.89                        |
| 6               | 102               | 0.77                        | 376                                | 0.82                  | 0.14                    | 0.90                        |
| 6               | 103               | 0.76                        | 689                                | 0.82                  | 0.11                    | 0.91                        |
| 6               | 104               | 0.77                        | 539                                | 0.83                  | 0.11                    | 0.91                        |
| 6               | 105               | 0.77                        | 437                                | 0.83                  | 0.10                    | 0.91                        |
| 6               | 106               | 0.77                        | 443                                | 0.83                  | 0.11                    | 0.91                        |
| 6               | 107               | 0.77                        | 647                                | 0.83                  | 0.10                    | 0.92                        |
| 6               | 108               | 0.77                        | 546                                | 0.83                  | 0.11                    | 0.91                        |
| 6               | 109               | 0.74                        | 360                                | 0.80                  | 0.13                    | 0.88                        |
| 6               | 110               | 0.77                        | 485                                | 0.83                  | 0.11                    | 0.91                        |
| 6               | 111               | 0.76                        | 770                                | 0.83                  | 0.11                    | 0.90                        |
| 6               | 112               | 0.77                        | 559                                | 0.84                  | 0.10                    | 0.92                        |
| 6               | 113               | 0.77                        | 535                                | 0.84                  | 0.09                    | 0.92                        |
| 6               | 114               | 0.72                        | 1                                  | 0.86                  | 0.00                    | 0.99                        |
| 6               | 115               | 0.78                        | 687                                | 0.84                  | 0.09                    | 0.92                        |
| 6               | 116               | 0.77                        | 577                                | 0.84                  | 0.09                    | 0.92                        |
| 6               | 117               | 0.77                        | 657                                | 0.84                  | 0.08                    | 0.92                        |
| 6               | 118               | 0.78                        | 738                                | 0.85                  | 0.09                    | 0.93                        |
| 6               | 119               | 0.71                        | 725                                | 0.81                  | 0.09                    | 0.89                        |
| 6               | 120               | 0.78                        | 553                                | 0.84                  | 0.10                    | 0.92                        |
| 7               | 2                 | 1.00                        | 1                                  | 1.00                  | 0.00                    | 1.00                        |
| 7               | 3                 | 1.00                        | 1                                  | 1.00                  | 0.00                    | 1.00                        |
| 7               | 4                 | 0.96                        | 63                                 | 0.97                  | 0.02                    | 1.00                        |
| 7               | 5                 | 0.93                        | 9                                  | 0.96                  | 0.00                    | 0.98                        |
| 7               | 6                 | 0.88                        | 1                                  | 0.94                  | 0.00                    | 0.98                        |

*Continued on next page*

Table S3 – *Continued from previous page*

| <b>Fault No</b> | <b>Sample Bin</b> | <b>Fault Detection Rate</b> | <b>Optimal Feature Subset Size</b> | <b>Model Accuracy</b> | <b>False Alarm Rate</b> | <b>Area Under the Curve</b> |
|-----------------|-------------------|-----------------------------|------------------------------------|-----------------------|-------------------------|-----------------------------|
| 7               | 7                 | 0.84                        | 2                                  | 0.92                  | 0.00                    | 0.98                        |
| 7               | 8                 | 0.92                        | 2                                  | 0.96                  | 0.00                    | 0.99                        |
| 7               | 9                 | 0.84                        | 1                                  | 0.92                  | 0.00                    | 0.98                        |
| 7               | 10                | 0.93                        | 4                                  | 0.97                  | 0.00                    | 0.99                        |
| 7               | 11                | 0.87                        | 107                                | 0.92                  | 0.04                    | 0.97                        |
| 7               | 12                | 0.92                        | 5                                  | 0.96                  | 0.00                    | 0.99                        |
| 7               | 13                | 0.86                        | 1                                  | 0.93                  | 0.00                    | 0.98                        |
| 7               | 14                | 0.80                        | 137                                | 0.88                  | 0.04                    | 0.96                        |
| 7               | 15                | 0.86                        | 108                                | 0.90                  | 0.05                    | 0.97                        |
| 7               | 16                | 0.82                        | 117                                | 0.90                  | 0.03                    | 0.97                        |
| 7               | 17                | 0.82                        | 70                                 | 0.90                  | 0.01                    | 0.98                        |
| 7               | 18                | 0.84                        | 130                                | 0.90                  | 0.04                    | 0.97                        |
| 7               | 19                | 0.79                        | 108                                | 0.89                  | 0.02                    | 0.97                        |
| 7               | 20                | 0.80                        | 143                                | 0.89                  | 0.02                    | 0.97                        |
| 7               | 21                | 0.80                        | 154                                | 0.89                  | 0.03                    | 0.96                        |
| 7               | 22                | 0.84                        | 111                                | 0.89                  | 0.05                    | 0.96                        |
| 7               | 23                | 0.78                        | 180                                | 0.87                  | 0.03                    | 0.96                        |
| 7               | 24                | 0.79                        | 146                                | 0.88                  | 0.03                    | 0.96                        |
| 7               | 25                | 0.82                        | 167                                | 0.89                  | 0.05                    | 0.96                        |
| 7               | 26                | 0.83                        | 165                                | 0.90                  | 0.03                    | 0.97                        |
| 7               | 27                | 0.79                        | 205                                | 0.88                  | 0.03                    | 0.95                        |
| 7               | 28                | 0.81                        | 134                                | 0.88                  | 0.05                    | 0.96                        |
| 7               | 29                | 0.87                        | 273                                | 0.91                  | 0.06                    | 0.97                        |
| 7               | 30                | 0.88                        | 260                                | 0.90                  | 0.07                    | 0.97                        |
| 7               | 31                | 0.81                        | 244                                | 0.89                  | 0.04                    | 0.96                        |
| 7               | 32                | 0.86                        | 260                                | 0.90                  | 0.06                    | 0.97                        |

*Continued on next page*

Table S3 – *Continued from previous page*

| <b>Fault No</b> | <b>Sample Bin</b> | <b>Fault Detection Rate</b> | <b>Optimal Feature Subset Size</b> | <b>Model Accuracy</b> | <b>False Alarm Rate</b> | <b>Area Under the Curve</b> |
|-----------------|-------------------|-----------------------------|------------------------------------|-----------------------|-------------------------|-----------------------------|
| 7               | 33                | 0.82                        | 314                                | 0.89                  | 0.05                    | 0.96                        |
| 7               | 34                | 0.88                        | 253                                | 0.91                  | 0.05                    | 0.97                        |
| 7               | 35                | 0.88                        | 230                                | 0.93                  | 0.03                    | 0.97                        |
| 7               | 36                | 0.80                        | 294                                | 0.89                  | 0.03                    | 0.96                        |
| 7               | 37                | 0.81                        | 275                                | 0.89                  | 0.04                    | 0.96                        |
| 7               | 38                | 0.82                        | 230                                | 0.89                  | 0.03                    | 0.96                        |
| 7               | 39                | 0.82                        | 374                                | 0.89                  | 0.03                    | 0.96                        |
| 7               | 40                | 0.81                        | 407                                | 0.88                  | 0.05                    | 0.95                        |
| 7               | 41                | 0.80                        | 272                                | 0.89                  | 0.02                    | 0.96                        |
| 7               | 42                | 0.81                        | 264                                | 0.89                  | 0.02                    | 0.96                        |
| 7               | 43                | 0.78                        | 299                                | 0.88                  | 0.03                    | 0.96                        |
| 7               | 44                | 0.80                        | 363                                | 0.88                  | 0.04                    | 0.96                        |
| 7               | 45                | 0.80                        | 294                                | 0.88                  | 0.04                    | 0.96                        |
| 7               | 46                | 0.81                        | 235                                | 0.88                  | 0.05                    | 0.95                        |
| 7               | 47                | 0.80                        | 255                                | 0.88                  | 0.04                    | 0.96                        |
| 7               | 48                | 0.79                        | 240                                | 0.88                  | 0.04                    | 0.95                        |
| 7               | 49                | 0.79                        | 278                                | 0.88                  | 0.04                    | 0.95                        |
| 7               | 50                | 0.78                        | 311                                | 0.87                  | 0.03                    | 0.95                        |
| 7               | 51                | 0.79                        | 236                                | 0.87                  | 0.04                    | 0.95                        |
| 7               | 52                | 0.79                        | 371                                | 0.87                  | 0.04                    | 0.95                        |
| 7               | 53                | 0.80                        | 302                                | 0.88                  | 0.04                    | 0.95                        |
| 7               | 54                | 0.78                        | 357                                | 0.87                  | 0.03                    | 0.95                        |
| 7               | 55                | 0.80                        | 275                                | 0.88                  | 0.04                    | 0.95                        |
| 7               | 56                | 0.77                        | 441                                | 0.87                  | 0.04                    | 0.95                        |
| 7               | 57                | 0.78                        | 380                                | 0.87                  | 0.04                    | 0.95                        |
| 7               | 58                | 0.78                        | 311                                | 0.87                  | 0.04                    | 0.95                        |

*Continued on next page*



Table S3 – *Continued from previous page*

| <b>Fault No</b> | <b>Sample Bin</b> | <b>Fault Detection Rate</b> | <b>Optimal Feature Subset Size</b> | <b>Model Accuracy</b> | <b>False Alarm Rate</b> | <b>Area Under the Curve</b> |
|-----------------|-------------------|-----------------------------|------------------------------------|-----------------------|-------------------------|-----------------------------|
| 7               | 59                | 0.78                        | 431                                | 0.87                  | 0.03                    | 0.95                        |
| 7               | 60                | 0.77                        | 348                                | 0.87                  | 0.02                    | 0.95                        |
| 7               | 61                | 0.80                        | 372                                | 0.87                  | 0.06                    | 0.94                        |
| 7               | 62                | 0.78                        | 331                                | 0.87                  | 0.03                    | 0.95                        |
| 7               | 63                | 0.77                        | 416                                | 0.87                  | 0.03                    | 0.95                        |
| 7               | 64                | 0.79                        | 415                                | 0.88                  | 0.04                    | 0.95                        |
| 7               | 65                | 0.79                        | 459                                | 0.88                  | 0.03                    | 0.95                        |
| 7               | 66                | 0.79                        | 429                                | 0.88                  | 0.04                    | 0.95                        |
| 7               | 67                | 0.78                        | 430                                | 0.87                  | 0.03                    | 0.95                        |
| 7               | 68                | 0.78                        | 368                                | 0.87                  | 0.03                    | 0.95                        |
| 7               | 69                | 0.80                        | 417                                | 0.89                  | 0.03                    | 0.96                        |
| 7               | 70                | 0.78                        | 553                                | 0.87                  | 0.03                    | 0.94                        |
| 7               | 71                | 0.80                        | 400                                | 0.88                  | 0.04                    | 0.95                        |
| 7               | 72                | 0.80                        | 278                                | 0.87                  | 0.06                    | 0.95                        |
| 7               | 73                | 0.81                        | 6                                  | 0.90                  | 0.00                    | 1.00                        |
| 7               | 74                | 0.78                        | 520                                | 0.88                  | 0.03                    | 0.95                        |
| 7               | 75                | 0.78                        | 378                                | 0.88                  | 0.02                    | 0.95                        |
| 7               | 76                | 0.78                        | 428                                | 0.88                  | 0.03                    | 0.95                        |
| 7               | 77                | 0.78                        | 484                                | 0.88                  | 0.03                    | 0.95                        |
| 7               | 78                | 0.78                        | 451                                | 0.88                  | 0.03                    | 0.96                        |
| 7               | 79                | 0.87                        | 2                                  | 0.94                  | 0.00                    | 1.00                        |
| 7               | 80                | 0.79                        | 401                                | 0.88                  | 0.04                    | 0.95                        |
| 7               | 81                | 0.81                        | 562                                | 0.89                  | 0.03                    | 0.96                        |
| 7               | 82                | 0.77                        | 508                                | 0.87                  | 0.03                    | 0.95                        |
| 7               | 83                | 0.87                        | 4                                  | 0.93                  | 0.00                    | 1.00                        |
| 7               | 84                | 0.77                        | 507                                | 0.87                  | 0.03                    | 0.95                        |

*Continued on next page*

Table S3 – *Continued from previous page*

| <b>Fault No</b> | <b>Sample Bin</b> | <b>Fault Detection Rate</b> | <b>Optimal Feature Subset Size</b> | <b>Model Accuracy</b> | <b>False Alarm Rate</b> | <b>Area Under the Curve</b> |
|-----------------|-------------------|-----------------------------|------------------------------------|-----------------------|-------------------------|-----------------------------|
| 7               | 85                | 0.80                        | 525                                | 0.87                  | 0.06                    | 0.94                        |
| 7               | 86                | 0.80                        | 413                                | 0.87                  | 0.05                    | 0.94                        |
| 7               | 87                | 0.81                        | 492                                | 0.88                  | 0.06                    | 0.95                        |
| 7               | 88                | 0.87                        | 4                                  | 0.93                  | 0.00                    | 1.00                        |
| 7               | 89                | 0.87                        | 4                                  | 0.93                  | 0.00                    | 1.00                        |
| 7               | 90                | 0.87                        | 3                                  | 0.94                  | 0.00                    | 1.00                        |
| 7               | 91                | 0.77                        | 587                                | 0.87                  | 0.03                    | 0.95                        |
| 7               | 92                | 0.81                        | 591                                | 0.87                  | 0.06                    | 0.94                        |
| 7               | 93                | 0.81                        | 629                                | 0.89                  | 0.04                    | 0.96                        |
| 7               | 94                | 0.77                        | 628                                | 0.87                  | 0.02                    | 0.95                        |
| 7               | 95                | 0.87                        | 6                                  | 0.94                  | 0.00                    | 1.00                        |
| 7               | 96                | 0.88                        | 5                                  | 0.94                  | 0.00                    | 1.00                        |
| 7               | 97                | 0.76                        | 431                                | 0.86                  | 0.03                    | 0.95                        |
| 7               | 98                | 0.77                        | 696                                | 0.87                  | 0.03                    | 0.95                        |
| 7               | 99                | 0.76                        | 653                                | 0.87                  | 0.03                    | 0.95                        |
| 7               | 100               | 0.80                        | 721                                | 0.87                  | 0.06                    | 0.94                        |
| 7               | 101               | 0.87                        | 2                                  | 0.93                  | 0.00                    | 1.00                        |
| 7               | 102               | 0.76                        | 616                                | 0.87                  | 0.02                    | 0.95                        |
| 7               | 103               | 0.77                        | 550                                | 0.87                  | 0.02                    | 0.95                        |
| 7               | 104               | 0.80                        | 499                                | 0.88                  | 0.04                    | 0.95                        |
| 7               | 105               | 0.76                        | 505                                | 0.87                  | 0.02                    | 0.95                        |
| 7               | 106               | 0.77                        | 817                                | 0.88                  | 0.02                    | 0.95                        |
| 7               | 107               | 0.81                        | 734                                | 0.88                  | 0.05                    | 0.95                        |
| 7               | 108               | 0.87                        | 1                                  | 0.93                  | 0.00                    | 1.00                        |
| 7               | 109               | 0.82                        | 702                                | 0.89                  | 0.04                    | 0.95                        |
| 7               | 110               | 0.81                        | 544                                | 0.88                  | 0.05                    | 0.95                        |

*Continued on next page*

Table S3 – Continued from previous page

| <b>Fault No</b> | <b>Sample Bin</b> | <b>Fault Detection Rate</b> | <b>Optimal Feature Subset Size</b> | <b>Model Accuracy</b> | <b>False Alarm Rate</b> | <b>Area Under the Curve</b> |
|-----------------|-------------------|-----------------------------|------------------------------------|-----------------------|-------------------------|-----------------------------|
| 7               | 111               | 0.82                        | 560                                | 0.89                  | 0.04                    | 0.95                        |
| 7               | 112               | 0.81                        | 1                                  | 0.91                  | 0.00                    | 1.00                        |
| 7               | 113               | 0.77                        | 688                                | 0.87                  | 0.03                    | 0.96                        |
| 7               | 114               | 0.81                        | 1                                  | 0.91                  | 0.00                    | 1.00                        |
| 7               | 115               | 0.77                        | 491                                | 0.88                  | 0.02                    | 0.95                        |
| 7               | 116               | 0.82                        | 618                                | 0.89                  | 0.04                    | 0.96                        |
| 7               | 117               | 0.78                        | 810                                | 0.88                  | 0.02                    | 0.96                        |
| 7               | 118               | 0.77                        | 744                                | 0.87                  | 0.02                    | 0.96                        |
| 7               | 119               | 0.76                        | 688                                | 0.87                  | 0.02                    | 0.95                        |
| 7               | 120               | 0.83                        | 433                                | 0.90                  | 0.03                    | 0.96                        |
| 8               | 2                 | 0.82                        | 35                                 | 0.87                  | 0.08                    | 0.96                        |
| 8               | 3                 | 0.89                        | 26                                 | 0.91                  | 0.07                    | 0.96                        |
| 8               | 4                 | 0.78                        | 3                                  | 0.85                  | 0.07                    | 0.88                        |
| 8               | 5                 | 0.93                        | 4                                  | 0.93                  | 0.08                    | 0.98                        |
| 8               | 6                 | 0.77                        | 63                                 | 0.86                  | 0.05                    | 0.94                        |
| 8               | 7                 | 0.72                        | 14                                 | 0.80                  | 0.13                    | 0.87                        |
| 8               | 8                 | 0.70                        | 16                                 | 0.78                  | 0.14                    | 0.88                        |
| 8               | 9                 | 0.85                        | 88                                 | 0.87                  | 0.10                    | 0.94                        |
| 8               | 10                | 0.84                        | 62                                 | 0.88                  | 0.09                    | 0.95                        |
| 8               | 11                | 0.90                        | 108                                | 0.90                  | 0.10                    | 0.96                        |
| 8               | 12                | 0.85                        | 104                                | 0.88                  | 0.09                    | 0.96                        |
| 8               | 13                | 0.88                        | 94                                 | 0.88                  | 0.11                    | 0.96                        |
| 8               | 14                | 0.84                        | 134                                | 0.87                  | 0.10                    | 0.94                        |
| 8               | 15                | 0.77                        | 63                                 | 0.82                  | 0.13                    | 0.91                        |
| 8               | 16                | 0.77                        | 129                                | 0.83                  | 0.11                    | 0.92                        |
| 8               | 17                | 0.79                        | 157                                | 0.84                  | 0.11                    | 0.92                        |

*Continued on next page*

Table S3 – *Continued from previous page*

| <b>Fault No</b> | <b>Sample Bin</b> | <b>Fault Detection Rate</b> | <b>Optimal Feature Subset Size</b> | <b>Model Accuracy</b> | <b>False Alarm Rate</b> | <b>Area Under the Curve</b> |
|-----------------|-------------------|-----------------------------|------------------------------------|-----------------------|-------------------------|-----------------------------|
| 8               | 18                | 0.80                        | 110                                | 0.83                  | 0.14                    | 0.91                        |
| 8               | 19                | 0.88                        | 161                                | 0.87                  | 0.13                    | 0.95                        |
| 8               | 20                | 0.79                        | 93                                 | 0.83                  | 0.12                    | 0.91                        |
| 8               | 21                | 0.79                        | 119                                | 0.84                  | 0.11                    | 0.93                        |
| 8               | 22                | 0.87                        | 148                                | 0.89                  | 0.08                    | 0.96                        |
| 8               | 23                | 0.83                        | 88                                 | 0.89                  | 0.05                    | 0.95                        |
| 8               | 24                | 0.84                        | 116                                | 0.90                  | 0.05                    | 0.96                        |
| 8               | 25                | 0.88                        | 99                                 | 0.90                  | 0.08                    | 0.96                        |
| 8               | 26                | 0.84                        | 165                                | 0.89                  | 0.06                    | 0.96                        |
| 8               | 27                | 0.84                        | 90                                 | 0.90                  | 0.04                    | 0.95                        |
| 8               | 28                | 0.83                        | 152                                | 0.89                  | 0.05                    | 0.95                        |
| 8               | 29                | 0.86                        | 206                                | 0.90                  | 0.05                    | 0.96                        |
| 8               | 30                | 0.90                        | 150                                | 0.93                  | 0.04                    | 0.97                        |
| 8               | 31                | 0.89                        | 3                                  | 0.94                  | 0.00                    | 0.99                        |
| 8               | 32                | 0.90                        | 123                                | 0.93                  | 0.03                    | 0.98                        |
| 8               | 33                | 0.88                        | 2                                  | 0.94                  | 0.00                    | 0.99                        |
| 8               | 34                | 0.91                        | 213                                | 0.94                  | 0.03                    | 0.98                        |
| 8               | 35                | 0.92                        | 7                                  | 0.96                  | 0.00                    | 1.00                        |
| 8               | 36                | 0.92                        | 250                                | 0.95                  | 0.02                    | 0.99                        |
| 8               | 37                | 0.91                        | 192                                | 0.94                  | 0.03                    | 0.99                        |
| 8               | 38                | 0.91                        | 247                                | 0.94                  | 0.03                    | 0.98                        |
| 8               | 39                | 0.91                        | 289                                | 0.94                  | 0.03                    | 0.99                        |
| 8               | 40                | 0.90                        | 20                                 | 0.95                  | 0.00                    | 0.99                        |
| 8               | 41                | 0.90                        | 215                                | 0.94                  | 0.03                    | 0.98                        |
| 8               | 42                | 0.93                        | 18                                 | 0.97                  | 0.00                    | 0.99                        |
| 8               | 43                | 0.90                        | 7                                  | 0.95                  | 0.00                    | 0.99                        |

*Continued on next page*

Table S3 – *Continued from previous page*

| <b>Fault No</b> | <b>Sample Bin</b> | <b>Fault Detection Rate</b> | <b>Optimal Feature Subset Size</b> | <b>Model Accuracy</b> | <b>False Alarm Rate</b> | <b>Area Under the Curve</b> |
|-----------------|-------------------|-----------------------------|------------------------------------|-----------------------|-------------------------|-----------------------------|
| 8               | 44                | 0.91                        | 20                                 | 0.96                  | 0.00                    | 1.00                        |
| 8               | 45                | 0.92                        | 13                                 | 0.96                  | 0.00                    | 1.00                        |
| 8               | 46                | 0.92                        | 21                                 | 0.96                  | 0.00                    | 1.00                        |
| 8               | 47                | 0.92                        | 16                                 | 0.96                  | 0.00                    | 0.99                        |
| 8               | 48                | 0.91                        | 13                                 | 0.96                  | 0.00                    | 0.99                        |
| 8               | 49                | 0.92                        | 274                                | 0.96                  | 0.01                    | 0.99                        |
| 8               | 50                | 0.94                        | 6                                  | 0.97                  | 0.00                    | 1.00                        |
| 8               | 51                | 0.93                        | 274                                | 0.96                  | 0.01                    | 0.99                        |
| 8               | 52                | 0.92                        | 311                                | 0.96                  | 0.01                    | 0.99                        |
| 8               | 53                | 0.93                        | 10                                 | 0.97                  | 0.00                    | 1.00                        |
| 8               | 54                | 0.94                        | 7                                  | 0.97                  | 0.00                    | 0.99                        |
| 8               | 55                | 0.93                        | 265                                | 0.96                  | 0.01                    | 0.99                        |
| 8               | 56                | 0.93                        | 183                                | 0.96                  | 0.00                    | 0.99                        |
| 8               | 57                | 0.94                        | 41                                 | 0.97                  | 0.00                    | 0.99                        |
| 8               | 58                | 0.93                        | 205                                | 0.96                  | 0.01                    | 0.99                        |
| 8               | 59                | 0.94                        | 370                                | 0.97                  | 0.01                    | 1.00                        |
| 8               | 60                | 0.96                        | 89                                 | 0.98                  | 0.00                    | 1.00                        |
| 8               | 61                | 0.95                        | 213                                | 0.98                  | 0.00                    | 1.00                        |
| 8               | 62                | 0.95                        | 161                                | 0.98                  | 0.00                    | 1.00                        |
| 8               | 63                | 0.96                        | 88                                 | 0.98                  | 0.00                    | 1.00                        |
| 8               | 64                | 0.96                        | 206                                | 0.98                  | 0.01                    | 1.00                        |
| 8               | 65                | 0.97                        | 156                                | 0.98                  | 0.01                    | 1.00                        |
| 8               | 66                | 0.96                        | 171                                | 0.98                  | 0.01                    | 1.00                        |
| 8               | 67                | 0.96                        | 111                                | 0.98                  | 0.00                    | 1.00                        |
| 8               | 68                | 0.97                        | 86                                 | 0.98                  | 0.00                    | 1.00                        |
| 8               | 69                | 0.97                        | 131                                | 0.98                  | 0.00                    | 1.00                        |

*Continued on next page*

Table S3 – *Continued from previous page*

| <b>Fault No</b> | <b>Sample Bin</b> | <b>Fault Detection Rate</b> | <b>Optimal Feature Subset Size</b> | <b>Model Accuracy</b> | <b>False Alarm Rate</b> | <b>Area Under the Curve</b> |
|-----------------|-------------------|-----------------------------|------------------------------------|-----------------------|-------------------------|-----------------------------|
| 8               | 70                | 0.96                        | 83                                 | 0.98                  | 0.00                    | 0.99                        |
| 8               | 71                | 0.97                        | 62                                 | 0.98                  | 0.00                    | 1.00                        |
| 8               | 72                | 0.96                        | 98                                 | 0.98                  | 0.00                    | 0.99                        |
| 8               | 73                | 0.96                        | 81                                 | 0.98                  | 0.00                    | 0.99                        |
| 8               | 74                | 0.97                        | 90                                 | 0.98                  | 0.00                    | 1.00                        |
| 8               | 75                | 0.96                        | 135                                | 0.98                  | 0.00                    | 1.00                        |
| 8               | 76                | 0.97                        | 77                                 | 0.99                  | 0.00                    | 1.00                        |
| 8               | 77                | 0.98                        | 64                                 | 0.99                  | 0.00                    | 1.00                        |
| 8               | 78                | 0.98                        | 75                                 | 0.99                  | 0.00                    | 1.00                        |
| 8               | 79                | 0.97                        | 220                                | 0.98                  | 0.00                    | 1.00                        |
| 8               | 80                | 0.97                        | 87                                 | 0.99                  | 0.00                    | 1.00                        |
| 8               | 81                | 0.98                        | 218                                | 0.99                  | 0.00                    | 1.00                        |
| 8               | 82                | 0.98                        | 49                                 | 0.99                  | 0.00                    | 1.00                        |
| 8               | 83                | 0.98                        | 21                                 | 0.99                  | 0.00                    | 0.99                        |
| 8               | 84                | 0.98                        | 126                                | 0.99                  | 0.00                    | 1.00                        |
| 8               | 85                | 0.97                        | 9                                  | 0.99                  | 0.00                    | 0.99                        |
| 8               | 86                | 0.97                        | 171                                | 0.99                  | 0.00                    | 1.00                        |
| 8               | 87                | 0.98                        | 11                                 | 0.99                  | 0.00                    | 0.99                        |
| 8               | 88                | 0.98                        | 13                                 | 0.99                  | 0.00                    | 0.99                        |
| 8               | 89                | 0.98                        | 12                                 | 0.98                  | 0.01                    | 0.99                        |
| 8               | 90                | 0.97                        | 196                                | 0.99                  | 0.00                    | 1.00                        |
| 8               | 91                | 0.97                        | 4                                  | 0.98                  | 0.00                    | 0.99                        |
| 8               | 92                | 0.98                        | 174                                | 0.99                  | 0.00                    | 1.00                        |
| 8               | 93                | 0.98                        | 344                                | 0.99                  | 0.00                    | 1.00                        |
| 8               | 94                | 0.97                        | 198                                | 0.99                  | 0.00                    | 1.00                        |
| 8               | 95                | 0.98                        | 10                                 | 0.99                  | 0.01                    | 1.00                        |

*Continued on next page*

Table S3 – *Continued from previous page*

| <b>Fault No</b> | <b>Sample Bin</b> | <b>Fault Detection Rate</b> | <b>Optimal Feature Subset Size</b> | <b>Model Accuracy</b> | <b>False Alarm Rate</b> | <b>Area Under the Curve</b> |
|-----------------|-------------------|-----------------------------|------------------------------------|-----------------------|-------------------------|-----------------------------|
| 8               | 96                | 0.98                        | 10                                 | 0.99                  | 0.01                    | 1.00                        |
| 8               | 97                | 0.98                        | 178                                | 0.99                  | 0.00                    | 1.00                        |
| 8               | 98                | 0.98                        | 13                                 | 0.99                  | 0.01                    | 1.00                        |
| 8               | 99                | 0.98                        | 11                                 | 0.99                  | 0.00                    | 1.00                        |
| 8               | 100               | 0.98                        | 13                                 | 0.99                  | 0.00                    | 0.99                        |
| 8               | 101               | 0.98                        | 12                                 | 0.99                  | 0.00                    | 0.99                        |
| 8               | 102               | 0.98                        | 11                                 | 0.99                  | 0.00                    | 0.99                        |
| 8               | 103               | 0.98                        | 15                                 | 0.99                  | 0.00                    | 1.00                        |
| 8               | 104               | 0.98                        | 16                                 | 0.99                  | 0.00                    | 1.00                        |
| 8               | 105               | 0.98                        | 8                                  | 0.99                  | 0.00                    | 0.99                        |
| 8               | 106               | 0.98                        | 12                                 | 0.99                  | 0.00                    | 1.00                        |
| 8               | 107               | 0.99                        | 17                                 | 0.99                  | 0.00                    | 1.00                        |
| 8               | 108               | 0.99                        | 14                                 | 1.00                  | 0.00                    | 1.00                        |
| 8               | 109               | 0.99                        | 13                                 | 1.00                  | 0.00                    | 1.00                        |
| 8               | 110               | 0.99                        | 19                                 | 1.00                  | 0.00                    | 1.00                        |
| 8               | 111               | 1.00                        | 13                                 | 1.00                  | 0.00                    | 1.00                        |
| 8               | 112               | 1.00                        | 14                                 | 1.00                  | 0.00                    | 1.00                        |
| 8               | 113               | 1.00                        | 14                                 | 1.00                  | 0.00                    | 1.00                        |
| 8               | 114               | 1.00                        | 14                                 | 1.00                  | 0.00                    | 1.00                        |
| 8               | 115               | 1.00                        | 18                                 | 1.00                  | 0.00                    | 1.00                        |
| 8               | 116               | 1.00                        | 19                                 | 1.00                  | 0.00                    | 1.00                        |
| 8               | 117               | 1.00                        | 22                                 | 1.00                  | 0.00                    | 1.00                        |
| 8               | 118               | 1.00                        | 22                                 | 1.00                  | 0.00                    | 1.00                        |
| 8               | 119               | 1.00                        | 15                                 | 1.00                  | 0.00                    | 1.00                        |
| 8               | 120               | 1.00                        | 17                                 | 1.00                  | 0.00                    | 1.00                        |
| 9               | 2                 | 0.88                        | 12                                 | 0.93                  | 0.02                    | 0.97                        |

*Continued on next page*

Table S3 – *Continued from previous page*

| <b>Fault No</b> | <b>Sample Bin</b> | <b>Fault Detection Rate</b> | <b>Optimal Feature Subset Size</b> | <b>Model Accuracy</b> | <b>False Alarm Rate</b> | <b>Area Under the Curve</b> |
|-----------------|-------------------|-----------------------------|------------------------------------|-----------------------|-------------------------|-----------------------------|
| 9               | 3                 | 0.95                        | 6                                  | 0.97                  | 0.01                    | 0.99                        |
| 9               | 4                 | 0.85                        | 7                                  | 0.92                  | 0.01                    | 0.96                        |
| 9               | 5                 | 0.76                        | 56                                 | 0.88                  | 0.01                    | 0.93                        |
| 9               | 6                 | 0.86                        | 44                                 | 0.91                  | 0.04                    | 0.98                        |
| 9               | 7                 | 0.76                        | 9                                  | 0.82                  | 0.12                    | 0.89                        |
| 9               | 8                 | 0.83                        | 52                                 | 0.90                  | 0.02                    | 0.96                        |
| 9               | 9                 | 0.84                        | 94                                 | 0.90                  | 0.04                    | 0.96                        |
| 9               | 10                | 0.84                        | 65                                 | 0.90                  | 0.03                    | 0.97                        |
| 9               | 11                | 0.76                        | 85                                 | 0.87                  | 0.02                    | 0.95                        |
| 9               | 12                | 0.72                        | 63                                 | 0.85                  | 0.02                    | 0.94                        |
| 9               | 13                | 0.76                        | 77                                 | 0.87                  | 0.03                    | 0.96                        |
| 9               | 14                | 0.81                        | 139                                | 0.88                  | 0.06                    | 0.96                        |
| 9               | 15                | 0.82                        | 125                                | 0.88                  | 0.05                    | 0.96                        |
| 9               | 16                | 0.77                        | 98                                 | 0.86                  | 0.06                    | 0.95                        |
| 9               | 17                | 0.77                        | 138                                | 0.86                  | 0.04                    | 0.96                        |
| 9               | 18                | 0.76                        | 105                                | 0.86                  | 0.03                    | 0.96                        |
| 9               | 19                | 0.81                        | 148                                | 0.88                  | 0.05                    | 0.96                        |
| 9               | 20                | 0.75                        | 171                                | 0.85                  | 0.05                    | 0.94                        |
| 9               | 21                | 0.83                        | 181                                | 0.88                  | 0.08                    | 0.95                        |
| 9               | 22                | 0.82                        | 190                                | 0.87                  | 0.08                    | 0.96                        |
| 9               | 23                | 0.83                        | 139                                | 0.88                  | 0.07                    | 0.95                        |
| 9               | 24                | 0.80                        | 154                                | 0.85                  | 0.11                    | 0.93                        |
| 9               | 25                | 0.74                        | 214                                | 0.85                  | 0.04                    | 0.93                        |
| 9               | 26                | 0.68                        | 138                                | 0.82                  | 0.04                    | 0.92                        |
| 9               | 27                | 0.69                        | 124                                | 0.83                  | 0.04                    | 0.92                        |
| 9               | 28                | 0.76                        | 142                                | 0.84                  | 0.08                    | 0.93                        |

*Continued on next page*



Table S3 – *Continued from previous page*

| <b>Fault No</b> | <b>Sample Bin</b> | <b>Fault Detection Rate</b> | <b>Optimal Feature Subset Size</b> | <b>Model Accuracy</b> | <b>False Alarm Rate</b> | <b>Area Under the Curve</b> |
|-----------------|-------------------|-----------------------------|------------------------------------|-----------------------|-------------------------|-----------------------------|
| 9               | 29                | 0.67                        | 80                                 | 0.81                  | 0.06                    | 0.89                        |
| 9               | 30                | 0.73                        | 137                                | 0.84                  | 0.05                    | 0.92                        |
| 9               | 31                | 0.71                        | 103                                | 0.82                  | 0.07                    | 0.91                        |
| 9               | 32                | 0.69                        | 274                                | 0.82                  | 0.04                    | 0.92                        |
| 9               | 33                | 0.62                        | 170                                | 0.80                  | 0.03                    | 0.91                        |
| 9               | 34                | 0.71                        | 272                                | 0.83                  | 0.04                    | 0.93                        |
| 9               | 35                | 0.69                        | 147                                | 0.82                  | 0.05                    | 0.91                        |
| 9               | 36                | 0.70                        | 324                                | 0.82                  | 0.05                    | 0.93                        |
| 9               | 37                | 0.74                        | 216                                | 0.83                  | 0.09                    | 0.90                        |
| 9               | 38                | 0.77                        | 188                                | 0.84                  | 0.10                    | 0.91                        |
| 9               | 39                | 0.74                        | 313                                | 0.85                  | 0.05                    | 0.93                        |
| 9               | 40                | 0.73                        | 305                                | 0.85                  | 0.04                    | 0.94                        |
| 9               | 41                | 0.73                        | 267                                | 0.85                  | 0.03                    | 0.93                        |
| 9               | 42                | 0.74                        | 172                                | 0.82                  | 0.10                    | 0.90                        |
| 9               | 43                | 0.72                        | 309                                | 0.83                  | 0.05                    | 0.92                        |
| 9               | 44                | 0.74                        | 196                                | 0.82                  | 0.10                    | 0.90                        |
| 9               | 45                | 0.74                        | 320                                | 0.84                  | 0.05                    | 0.92                        |
| 9               | 46                | 0.73                        | 372                                | 0.84                  | 0.06                    | 0.93                        |
| 9               | 47                | 0.74                        | 391                                | 0.84                  | 0.05                    | 0.92                        |
| 9               | 48                | 0.73                        | 323                                | 0.84                  | 0.05                    | 0.92                        |
| 9               | 49                | 0.71                        | 383                                | 0.84                  | 0.04                    | 0.92                        |
| 9               | 50                | 0.72                        | 352                                | 0.84                  | 0.05                    | 0.92                        |
| 9               | 51                | 0.78                        | 312                                | 0.84                  | 0.09                    | 0.92                        |
| 9               | 52                | 0.71                        | 348                                | 0.84                  | 0.04                    | 0.91                        |
| 9               | 53                | 0.77                        | 366                                | 0.84                  | 0.09                    | 0.92                        |
| 9               | 54                | 0.68                        | 386                                | 0.82                  | 0.04                    | 0.91                        |

*Continued on next page*

Table S3 – *Continued from previous page*

| <b>Fault No</b> | <b>Sample Bin</b> | <b>Fault Detection Rate</b> | <b>Optimal Feature Subset Size</b> | <b>Model Accuracy</b> | <b>False Alarm Rate</b> | <b>Area Under the Curve</b> |
|-----------------|-------------------|-----------------------------|------------------------------------|-----------------------|-------------------------|-----------------------------|
| 9               | 55                | 0.69                        | 417                                | 0.82                  | 0.04                    | 0.91                        |
| 9               | 56                | 0.67                        | 511                                | 0.81                  | 0.04                    | 0.91                        |
| 9               | 57                | 0.68                        | 345                                | 0.82                  | 0.04                    | 0.90                        |
| 9               | 58                | 0.68                        | 315                                | 0.81                  | 0.05                    | 0.90                        |
| 9               | 59                | 0.70                        | 509                                | 0.83                  | 0.04                    | 0.92                        |
| 9               | 60                | 0.68                        | 585                                | 0.82                  | 0.04                    | 0.91                        |
| 9               | 61                | 0.67                        | 409                                | 0.81                  | 0.04                    | 0.91                        |
| 9               | 62                | 0.75                        | 345                                | 0.83                  | 0.09                    | 0.91                        |
| 9               | 63                | 0.75                        | 313                                | 0.82                  | 0.11                    | 0.90                        |
| 9               | 64                | 0.77                        | 591                                | 0.84                  | 0.08                    | 0.92                        |
| 9               | 65                | 0.74                        | 264                                | 0.82                  | 0.11                    | 0.90                        |
| 9               | 66                | 0.75                        | 366                                | 0.83                  | 0.10                    | 0.90                        |
| 9               | 67                | 0.65                        | 324                                | 0.80                  | 0.05                    | 0.90                        |
| 9               | 68                | 0.75                        | 250                                | 0.82                  | 0.12                    | 0.90                        |
| 9               | 69                | 0.66                        | 399                                | 0.80                  | 0.05                    | 0.90                        |
| 9               | 70                | 0.66                        | 248                                | 0.80                  | 0.05                    | 0.89                        |
| 9               | 71                | 0.66                        | 463                                | 0.80                  | 0.05                    | 0.89                        |
| 9               | 72                | 0.75                        | 365                                | 0.82                  | 0.10                    | 0.90                        |
| 9               | 73                | 0.65                        | 621                                | 0.81                  | 0.03                    | 0.91                        |
| 9               | 74                | 0.76                        | 283                                | 0.83                  | 0.11                    | 0.90                        |
| 9               | 75                | 0.76                        | 243                                | 0.82                  | 0.11                    | 0.90                        |
| 9               | 76                | 0.63                        | 113                                | 0.77                  | 0.09                    | 0.85                        |
| 9               | 77                | 0.76                        | 373                                | 0.82                  | 0.11                    | 0.90                        |
| 9               | 78                | 0.64                        | 491                                | 0.80                  | 0.05                    | 0.90                        |
| 9               | 79                | 0.74                        | 272                                | 0.81                  | 0.12                    | 0.89                        |
| 9               | 80                | 0.74                        | 393                                | 0.82                  | 0.11                    | 0.90                        |

*Continued on next page*

Table S3 – *Continued from previous page*

| <b>Fault No</b> | <b>Sample Bin</b> | <b>Fault Detection Rate</b> | <b>Optimal Feature Subset Size</b> | <b>Model Accuracy</b> | <b>False Alarm Rate</b> | <b>Area Under the Curve</b> |
|-----------------|-------------------|-----------------------------|------------------------------------|-----------------------|-------------------------|-----------------------------|
| 9               | 81                | 0.65                        | 373                                | 0.80                  | 0.05                    | 0.89                        |
| 9               | 82                | 0.64                        | 519                                | 0.80                  | 0.05                    | 0.90                        |
| 9               | 83                | 0.63                        | 652                                | 0.80                  | 0.04                    | 0.90                        |
| 9               | 84                | 0.64                        | 589                                | 0.80                  | 0.04                    | 0.90                        |
| 9               | 85                | 0.63                        | 638                                | 0.79                  | 0.05                    | 0.90                        |
| 9               | 86                | 0.78                        | 519                                | 0.84                  | 0.10                    | 0.92                        |
| 9               | 87                | 0.76                        | 358                                | 0.84                  | 0.09                    | 0.92                        |
| 9               | 88                | 0.76                        | 594                                | 0.84                  | 0.08                    | 0.92                        |
| 9               | 89                | 0.78                        | 442                                | 0.83                  | 0.11                    | 0.91                        |
| 9               | 90                | 0.76                        | 916                                | 0.83                  | 0.09                    | 0.91                        |
| 9               | 91                | 0.78                        | 654                                | 0.83                  | 0.11                    | 0.91                        |
| 9               | 92                | 0.77                        | 711                                | 0.84                  | 0.08                    | 0.93                        |
| 9               | 93                | 0.76                        | 983                                | 0.84                  | 0.09                    | 0.92                        |
| 9               | 94                | 0.76                        | 685                                | 0.84                  | 0.09                    | 0.92                        |
| 9               | 95                | 0.76                        | 743                                | 0.84                  | 0.08                    | 0.92                        |
| 9               | 96                | 0.76                        | 705                                | 0.84                  | 0.08                    | 0.92                        |
| 9               | 97                | 0.78                        | 668                                | 0.84                  | 0.10                    | 0.92                        |
| 9               | 98                | 0.77                        | 1097                               | 0.84                  | 0.09                    | 0.92                        |
| 9               | 99                | 0.76                        | 1016                               | 0.83                  | 0.10                    | 0.91                        |
| 9               | 100               | 0.78                        | 786                                | 0.84                  | 0.11                    | 0.92                        |
| 9               | 101               | 0.76                        | 1052                               | 0.84                  | 0.09                    | 0.92                        |
| 9               | 102               | 0.75                        | 1078                               | 0.83                  | 0.09                    | 0.91                        |
| 9               | 103               | 0.79                        | 850                                | 0.85                  | 0.09                    | 0.92                        |
| 9               | 104               | 0.77                        | 730                                | 0.84                  | 0.08                    | 0.92                        |
| 9               | 105               | 0.70                        | 1123                               | 0.83                  | 0.04                    | 0.92                        |
| 9               | 106               | 0.76                        | 1113                               | 0.84                  | 0.08                    | 0.92                        |

*Continued on next page*

Table S3 – *Continued from previous page*

| <b>Fault No</b> | <b>Sample Bin</b> | <b>Fault Detection Rate</b> | <b>Optimal Feature Subset Size</b> | <b>Model Accuracy</b> | <b>False Alarm Rate</b> | <b>Area Under the Curve</b> |
|-----------------|-------------------|-----------------------------|------------------------------------|-----------------------|-------------------------|-----------------------------|
| 9               | 107               | 0.77                        | 1185                               | 0.84                  | 0.08                    | 0.93                        |
| 9               | 108               | 0.76                        | 1227                               | 0.84                  | 0.08                    | 0.92                        |
| 9               | 109               | 0.78                        | 1200                               | 0.85                  | 0.08                    | 0.93                        |
| 9               | 110               | 0.76                        | 1089                               | 0.85                  | 0.07                    | 0.93                        |
| 9               | 111               | 0.77                        | 1159                               | 0.85                  | 0.06                    | 0.93                        |
| 9               | 112               | 0.76                        | 1130                               | 0.84                  | 0.08                    | 0.92                        |
| 9               | 113               | 0.77                        | 1177                               | 0.85                  | 0.07                    | 0.93                        |
| 9               | 114               | 0.76                        | 1191                               | 0.84                  | 0.08                    | 0.92                        |
| 9               | 115               | 0.77                        | 1175                               | 0.84                  | 0.08                    | 0.93                        |
| 9               | 116               | 0.77                        | 1281                               | 0.84                  | 0.08                    | 0.93                        |
| 9               | 117               | 0.77                        | 1261                               | 0.85                  | 0.07                    | 0.93                        |
| 9               | 118               | 0.77                        | 1291                               | 0.85                  | 0.07                    | 0.93                        |
| 9               | 119               | 0.77                        | 1314                               | 0.85                  | 0.07                    | 0.93                        |
| 9               | 120               | 0.77                        | 1224                               | 0.84                  | 0.08                    | 0.93                        |
| 10              | 2                 | 0.84                        | 13                                 | 0.84                  | 0.16                    | 0.95                        |
| 10              | 3                 | 0.92                        | 46                                 | 0.91                  | 0.11                    | 0.97                        |
| 10              | 4                 | 0.94                        | 1                                  | 0.78                  | 0.38                    | 0.91                        |
| 10              | 5                 | 0.94                        | 51                                 | 0.92                  | 0.09                    | 0.97                        |
| 10              | 6                 | 0.81                        | 55                                 | 0.85                  | 0.11                    | 0.94                        |
| 10              | 7                 | 0.71                        | 52                                 | 0.82                  | 0.07                    | 0.93                        |
| 10              | 8                 | 0.80                        | 71                                 | 0.87                  | 0.06                    | 0.95                        |
| 10              | 9                 | 0.89                        | 54                                 | 0.91                  | 0.07                    | 0.97                        |
| 10              | 10                | 0.87                        | 73                                 | 0.90                  | 0.07                    | 0.97                        |
| 10              | 11                | 0.80                        | 118                                | 0.87                  | 0.07                    | 0.95                        |
| 10              | 12                | 0.90                        | 70                                 | 0.91                  | 0.08                    | 0.97                        |
| 10              | 13                | 0.85                        | 128                                | 0.88                  | 0.09                    | 0.95                        |

*Continued on next page*

Table S3 – *Continued from previous page*

| <b>Fault No</b> | <b>Sample Bin</b> | <b>Fault Detection Rate</b> | <b>Optimal Feature Subset Size</b> | <b>Model Accuracy</b> | <b>False Alarm Rate</b> | <b>Area Under the Curve</b> |
|-----------------|-------------------|-----------------------------|------------------------------------|-----------------------|-------------------------|-----------------------------|
| 10              | 14                | 0.88                        | 122                                | 0.89                  | 0.10                    | 0.96                        |
| 10              | 15                | 0.82                        | 69                                 | 0.88                  | 0.07                    | 0.95                        |
| 10              | 16                | 0.86                        | 88                                 | 0.89                  | 0.07                    | 0.97                        |
| 10              | 17                | 0.83                        | 92                                 | 0.89                  | 0.05                    | 0.96                        |
| 10              | 18                | 0.81                        | 100                                | 0.87                  | 0.06                    | 0.95                        |
| 10              | 19                | 0.83                        | 88                                 | 0.88                  | 0.06                    | 0.95                        |
| 10              | 20                | 0.80                        | 126                                | 0.88                  | 0.05                    | 0.95                        |
| 10              | 21                | 0.81                        | 75                                 | 0.89                  | 0.04                    | 0.94                        |
| 10              | 22                | 0.81                        | 63                                 | 0.87                  | 0.06                    | 0.95                        |
| 10              | 23                | 0.80                        | 91                                 | 0.87                  | 0.05                    | 0.95                        |
| 10              | 24                | 0.77                        | 167                                | 0.87                  | 0.04                    | 0.95                        |
| 10              | 25                | 0.80                        | 114                                | 0.86                  | 0.07                    | 0.94                        |
| 10              | 26                | 0.74                        | 111                                | 0.84                  | 0.05                    | 0.92                        |
| 10              | 27                | 0.72                        | 138                                | 0.84                  | 0.04                    | 0.92                        |
| 10              | 28                | 0.76                        | 115                                | 0.85                  | 0.05                    | 0.93                        |
| 10              | 29                | 0.80                        | 158                                | 0.86                  | 0.09                    | 0.93                        |
| 10              | 30                | 0.81                        | 180                                | 0.85                  | 0.11                    | 0.92                        |
| 10              | 31                | 0.80                        | 180                                | 0.87                  | 0.07                    | 0.94                        |
| 10              | 32                | 0.81                        | 173                                | 0.87                  | 0.07                    | 0.95                        |
| 10              | 33                | 0.75                        | 255                                | 0.85                  | 0.05                    | 0.93                        |
| 10              | 34                | 0.80                        | 213                                | 0.86                  | 0.08                    | 0.94                        |
| 10              | 35                | 0.80                        | 319                                | 0.86                  | 0.07                    | 0.94                        |
| 10              | 36                | 0.83                        | 287                                | 0.87                  | 0.08                    | 0.94                        |
| 10              | 37                | 0.85                        | 218                                | 0.88                  | 0.10                    | 0.95                        |
| 10              | 38                | 0.76                        | 314                                | 0.86                  | 0.05                    | 0.94                        |
| 10              | 39                | 0.80                        | 346                                | 0.87                  | 0.07                    | 0.94                        |

*Continued on next page*

Table S3 – *Continued from previous page*

| <b>Fault No</b> | <b>Sample Bin</b> | <b>Fault Detection Rate</b> | <b>Optimal Feature Subset Size</b> | <b>Model Accuracy</b> | <b>False Alarm Rate</b> | <b>Area Under the Curve</b> |
|-----------------|-------------------|-----------------------------|------------------------------------|-----------------------|-------------------------|-----------------------------|
| 10              | 40                | 0.82                        | 408                                | 0.86                  | 0.09                    | 0.94                        |
| 10              | 41                | 0.75                        | 259                                | 0.85                  | 0.06                    | 0.93                        |
| 10              | 42                | 0.79                        | 316                                | 0.84                  | 0.11                    | 0.93                        |
| 10              | 43                | 0.78                        | 297                                | 0.84                  | 0.10                    | 0.92                        |
| 10              | 44                | 0.78                        | 305                                | 0.84                  | 0.09                    | 0.92                        |
| 10              | 45                | 0.79                        | 220                                | 0.84                  | 0.10                    | 0.92                        |
| 10              | 46                | 0.96                        | 1                                  | 0.69                  | 0.58                    | 0.96                        |
| 10              | 47                | 0.86                        | 5                                  | 0.80                  | 0.27                    | 0.88                        |
| 10              | 48                | 0.88                        | 4                                  | 0.80                  | 0.28                    | 0.88                        |
| 10              | 49                | 0.90                        | 283                                | 0.92                  | 0.06                    | 0.97                        |
| 10              | 50                | 0.91                        | 21                                 | 0.90                  | 0.11                    | 0.96                        |
| 10              | 51                | 0.93                        | 234                                | 0.94                  | 0.04                    | 0.98                        |
| 10              | 52                | 0.94                        | 284                                | 0.96                  | 0.02                    | 0.99                        |
| 10              | 53                | 0.94                        | 141                                | 0.95                  | 0.03                    | 0.99                        |
| 10              | 54                | 0.92                        | 112                                | 0.95                  | 0.02                    | 0.99                        |
| 10              | 55                | 0.95                        | 85                                 | 0.96                  | 0.02                    | 0.99                        |
| 10              | 56                | 0.96                        | 89                                 | 0.97                  | 0.01                    | 1.00                        |
| 10              | 57                | 0.96                        | 74                                 | 0.98                  | 0.00                    | 1.00                        |
| 10              | 58                | 0.97                        | 470                                | 0.98                  | 0.00                    | 1.00                        |
| 10              | 59                | 0.97                        | 294                                | 0.98                  | 0.00                    | 1.00                        |
| 10              | 60                | 0.97                        | 345                                | 0.98                  | 0.00                    | 1.00                        |
| 10              | 61                | 0.98                        | 139                                | 0.99                  | 0.01                    | 1.00                        |
| 10              | 62                | 0.98                        | 338                                | 0.99                  | 0.00                    | 1.00                        |
| 10              | 63                | 0.98                        | 247                                | 0.99                  | 0.00                    | 1.00                        |
| 10              | 64                | 0.97                        | 429                                | 0.99                  | 0.00                    | 1.00                        |
| 10              | 65                | 0.97                        | 380                                | 0.98                  | 0.00                    | 1.00                        |

*Continued on next page*

Table S3 – *Continued from previous page*

| <b>Fault No</b> | <b>Sample Bin</b> | <b>Fault Detection Rate</b> | <b>Optimal Feature Subset Size</b> | <b>Model Accuracy</b> | <b>False Alarm Rate</b> | <b>Area Under the Curve</b> |
|-----------------|-------------------|-----------------------------|------------------------------------|-----------------------|-------------------------|-----------------------------|
| 10              | 66                | 0.98                        | 339                                | 0.99                  | 0.00                    | 1.00                        |
| 10              | 67                | 0.98                        | 187                                | 0.99                  | 0.00                    | 1.00                        |
| 10              | 68                | 0.98                        | 343                                | 0.99                  | 0.00                    | 1.00                        |
| 10              | 69                | 0.98                        | 487                                | 0.99                  | 0.00                    | 1.00                        |
| 10              | 70                | 0.98                        | 379                                | 0.99                  | 0.00                    | 1.00                        |
| 10              | 71                | 0.97                        | 362                                | 0.99                  | 0.00                    | 1.00                        |
| 10              | 72                | 0.97                        | 320                                | 0.98                  | 0.00                    | 1.00                        |
| 10              | 73                | 0.98                        | 351                                | 0.99                  | 0.00                    | 1.00                        |
| 10              | 74                | 0.98                        | 465                                | 0.99                  | 0.00                    | 1.00                        |
| 10              | 75                | 0.97                        | 530                                | 0.98                  | 0.00                    | 1.00                        |
| 10              | 76                | 0.97                        | 340                                | 0.98                  | 0.00                    | 1.00                        |
| 10              | 77                | 0.97                        | 415                                | 0.98                  | 0.00                    | 1.00                        |
| 10              | 78                | 0.98                        | 65                                 | 0.99                  | 0.00                    | 1.00                        |
| 10              | 79                | 0.98                        | 45                                 | 0.99                  | 0.00                    | 1.00                        |
| 10              | 80                | 0.97                        | 40                                 | 0.99                  | 0.00                    | 1.00                        |
| 10              | 81                | 0.98                        | 48                                 | 0.99                  | 0.00                    | 1.00                        |
| 10              | 82                | 0.98                        | 37                                 | 0.99                  | 0.00                    | 1.00                        |
| 10              | 83                | 0.98                        | 38                                 | 0.99                  | 0.00                    | 1.00                        |
| 10              | 84                | 0.99                        | 50                                 | 0.99                  | 0.00                    | 1.00                        |
| 10              | 85                | 0.98                        | 434                                | 0.99                  | 0.00                    | 1.00                        |
| 10              | 86                | 0.98                        | 59                                 | 0.99                  | 0.00                    | 1.00                        |
| 10              | 87                | 0.98                        | 62                                 | 0.99                  | 0.00                    | 1.00                        |
| 10              | 88                | 0.98                        | 70                                 | 0.99                  | 0.00                    | 1.00                        |
| 10              | 89                | 0.99                        | 93                                 | 0.99                  | 0.00                    | 1.00                        |
| 10              | 90                | 0.98                        | 56                                 | 0.99                  | 0.00                    | 1.00                        |
| 10              | 91                | 0.98                        | 56                                 | 0.99                  | 0.00                    | 1.00                        |

*Continued on next page*

Table S3 – *Continued from previous page*

| <b>Fault No</b> | <b>Sample Bin</b> | <b>Fault Detection Rate</b> | <b>Optimal Feature Subset Size</b> | <b>Model Accuracy</b> | <b>False Alarm Rate</b> | <b>Area Under the Curve</b> |
|-----------------|-------------------|-----------------------------|------------------------------------|-----------------------|-------------------------|-----------------------------|
| 10              | 92                | 0.98                        | 51                                 | 0.99                  | 0.00                    | 1.00                        |
| 10              | 93                | 0.98                        | 51                                 | 0.99                  | 0.00                    | 0.99                        |
| 10              | 94                | 0.98                        | 37                                 | 0.99                  | 0.00                    | 1.00                        |
| 10              | 95                | 0.98                        | 72                                 | 0.99                  | 0.00                    | 1.00                        |
| 10              | 96                | 0.97                        | 80                                 | 0.99                  | 0.00                    | 1.00                        |
| 10              | 97                | 0.98                        | 61                                 | 0.99                  | 0.00                    | 1.00                        |
| 10              | 98                | 0.98                        | 38                                 | 0.99                  | 0.00                    | 1.00                        |
| 10              | 99                | 0.98                        | 51                                 | 0.99                  | 0.00                    | 1.00                        |
| 10              | 100               | 0.98                        | 50                                 | 0.99                  | 0.00                    | 1.00                        |
| 10              | 101               | 0.98                        | 50                                 | 0.99                  | 0.00                    | 1.00                        |
| 10              | 102               | 0.98                        | 92                                 | 0.99                  | 0.00                    | 1.00                        |
| 10              | 103               | 0.98                        | 39                                 | 0.99                  | 0.00                    | 1.00                        |
| 10              | 104               | 0.98                        | 56                                 | 0.99                  | 0.00                    | 1.00                        |
| 10              | 105               | 0.98                        | 76                                 | 0.99                  | 0.00                    | 1.00                        |
| 10              | 106               | 0.98                        | 83                                 | 0.99                  | 0.00                    | 1.00                        |
| 10              | 107               | 0.98                        | 66                                 | 0.99                  | 0.00                    | 1.00                        |
| 10              | 108               | 0.99                        | 36                                 | 0.99                  | 0.00                    | 1.00                        |
| 10              | 109               | 0.99                        | 39                                 | 0.99                  | 0.00                    | 1.00                        |
| 10              | 110               | 1.00                        | 59                                 | 1.00                  | 0.00                    | 1.00                        |
| 10              | 111               | 1.00                        | 50                                 | 1.00                  | 0.00                    | 1.00                        |
| 10              | 112               | 1.00                        | 54                                 | 1.00                  | 0.00                    | 1.00                        |
| 10              | 113               | 1.00                        | 63                                 | 1.00                  | 0.00                    | 1.00                        |
| 10              | 114               | 1.00                        | 56                                 | 1.00                  | 0.00                    | 1.00                        |
| 10              | 115               | 1.00                        | 70                                 | 1.00                  | 0.00                    | 1.00                        |
| 10              | 116               | 1.00                        | 74                                 | 1.00                  | 0.00                    | 1.00                        |
| 10              | 117               | 1.00                        | 73                                 | 1.00                  | 0.00                    | 1.00                        |

*Continued on next page*



Table S3 – *Continued from previous page*

| <b>Fault No</b> | <b>Sample Bin</b> | <b>Fault Detection Rate</b> | <b>Optimal Feature Subset Size</b> | <b>Model Accuracy</b> | <b>False Alarm Rate</b> | <b>Area Under the Curve</b> |
|-----------------|-------------------|-----------------------------|------------------------------------|-----------------------|-------------------------|-----------------------------|
| 10              | 118               | 1.00                        | 85                                 | 1.00                  | 0.00                    | 1.00                        |
| 10              | 119               | 1.00                        | 86                                 | 1.00                  | 0.00                    | 1.00                        |
| 10              | 120               | 1.00                        | 104                                | 1.00                  | 0.00                    | 1.00                        |
| 11              | 2                 | 0.93                        | 102                                | 0.84                  | 0.26                    | 0.92                        |
| 11              | 3                 | 0.79                        | 17                                 | 0.88                  | 0.03                    | 0.98                        |
| 11              | 4                 | 0.86                        | 40                                 | 0.91                  | 0.04                    | 0.98                        |
| 11              | 5                 | 0.88                        | 58                                 | 0.91                  | 0.07                    | 0.97                        |
| 11              | 6                 | 0.90                        | 62                                 | 0.92                  | 0.06                    | 0.98                        |
| 11              | 7                 | 0.87                        | 236                                | 0.80                  | 0.28                    | 0.88                        |
| 11              | 8                 | 0.87                        | 69                                 | 0.92                  | 0.04                    | 0.98                        |
| 11              | 9                 | 0.86                        | 87                                 | 0.90                  | 0.06                    | 0.97                        |
| 11              | 10                | 0.80                        | 78                                 | 0.87                  | 0.05                    | 0.96                        |
| 11              | 11                | 0.81                        | 82                                 | 0.88                  | 0.05                    | 0.96                        |
| 11              | 12                | 0.84                        | 60                                 | 0.90                  | 0.05                    | 0.96                        |
| 11              | 13                | 0.71                        | 71                                 | 0.84                  | 0.04                    | 0.94                        |
| 11              | 14                | 0.89                        | 357                                | 0.73                  | 0.42                    | 0.82                        |
| 11              | 15                | 0.84                        | 114                                | 0.88                  | 0.08                    | 0.95                        |
| 11              | 16                | 0.74                        | 126                                | 0.84                  | 0.06                    | 0.94                        |
| 11              | 17                | 0.80                        | 104                                | 0.84                  | 0.12                    | 0.92                        |
| 11              | 18                | 0.70                        | 144                                | 0.83                  | 0.05                    | 0.92                        |
| 11              | 19                | 0.70                        | 60                                 | 0.83                  | 0.05                    | 0.92                        |
| 11              | 20                | 0.69                        | 150                                | 0.82                  | 0.05                    | 0.93                        |
| 11              | 21                | 0.67                        | 62                                 | 0.79                  | 0.09                    | 0.89                        |
| 11              | 22                | 0.72                        | 84                                 | 0.82                  | 0.08                    | 0.91                        |
| 11              | 23                | 0.68                        | 141                                | 0.81                  | 0.06                    | 0.91                        |
| 11              | 24                | 0.71                        | 84                                 | 0.81                  | 0.09                    | 0.90                        |

*Continued on next page*

Table S3 – *Continued from previous page*

| <b>Fault No</b> | <b>Sample Bin</b> | <b>Fault Detection Rate</b> | <b>Optimal Feature Subset Size</b> | <b>Model Accuracy</b> | <b>False Alarm Rate</b> | <b>Area Under the Curve</b> |
|-----------------|-------------------|-----------------------------|------------------------------------|-----------------------|-------------------------|-----------------------------|
| 11              | 25                | 0.66                        | 153                                | 0.79                  | 0.08                    | 0.87                        |
| 11              | 26                | 0.72                        | 110                                | 0.82                  | 0.08                    | 0.91                        |
| 11              | 27                | 0.75                        | 94                                 | 0.83                  | 0.08                    | 0.91                        |
| 11              | 28                | 0.71                        | 56                                 | 0.81                  | 0.09                    | 0.89                        |
| 11              | 29                | 0.72                        | 81                                 | 0.82                  | 0.08                    | 0.91                        |
| 11              | 30                | 0.72                        | 116                                | 0.82                  | 0.09                    | 0.91                        |
| 11              | 31                | 0.71                        | 92                                 | 0.81                  | 0.09                    | 0.90                        |
| 11              | 32                | 0.72                        | 68                                 | 0.81                  | 0.10                    | 0.90                        |
| 11              | 33                | 0.70                        | 67                                 | 0.80                  | 0.10                    | 0.89                        |
| 11              | 34                | 0.74                        | 93                                 | 0.83                  | 0.08                    | 0.91                        |
| 11              | 35                | 0.68                        | 137                                | 0.79                  | 0.10                    | 0.87                        |
| 11              | 36                | 0.69                        | 70                                 | 0.80                  | 0.09                    | 0.89                        |
| 11              | 37                | 0.73                        | 75                                 | 0.81                  | 0.10                    | 0.89                        |
| 11              | 38                | 0.74                        | 97                                 | 0.83                  | 0.09                    | 0.91                        |
| 11              | 39                | 0.74                        | 122                                | 0.84                  | 0.06                    | 0.92                        |
| 11              | 40                | 0.77                        | 267                                | 0.85                  | 0.06                    | 0.93                        |
| 11              | 41                | 0.76                        | 215                                | 0.85                  | 0.05                    | 0.93                        |
| 11              | 42                | 0.74                        | 301                                | 0.83                  | 0.08                    | 0.90                        |
| 11              | 43                | 0.75                        | 87                                 | 0.83                  | 0.10                    | 0.91                        |
| 11              | 44                | 0.73                        | 86                                 | 0.82                  | 0.09                    | 0.91                        |
| 11              | 45                | 0.74                        | 138                                | 0.84                  | 0.06                    | 0.92                        |
| 11              | 46                | 0.73                        | 80                                 | 0.82                  | 0.09                    | 0.90                        |
| 11              | 47                | 0.73                        | 155                                | 0.84                  | 0.06                    | 0.92                        |
| 11              | 48                | 0.73                        | 300                                | 0.83                  | 0.07                    | 0.92                        |
| 11              | 49                | 0.73                        | 282                                | 0.83                  | 0.07                    | 0.92                        |
| 11              | 50                | 0.73                        | 87                                 | 0.82                  | 0.09                    | 0.90                        |

*Continued on next page*

Table S3 – *Continued from previous page*

| <b>Fault No</b> | <b>Sample Bin</b> | <b>Fault Detection Rate</b> | <b>Optimal Feature Subset Size</b> | <b>Model Accuracy</b> | <b>False Alarm Rate</b> | <b>Area Under the Curve</b> |
|-----------------|-------------------|-----------------------------|------------------------------------|-----------------------|-------------------------|-----------------------------|
| 11              | 51                | 0.73                        | 254                                | 0.83                  | 0.06                    | 0.92                        |
| 11              | 52                | 0.73                        | 159                                | 0.83                  | 0.07                    | 0.91                        |
| 11              | 53                | 0.74                        | 277                                | 0.83                  | 0.08                    | 0.92                        |
| 11              | 54                | 0.73                        | 304                                | 0.83                  | 0.07                    | 0.92                        |
| 11              | 55                | 0.73                        | 170                                | 0.83                  | 0.07                    | 0.91                        |
| 11              | 56                | 0.75                        | 183                                | 0.84                  | 0.07                    | 0.92                        |
| 11              | 57                | 0.73                        | 204                                | 0.83                  | 0.07                    | 0.91                        |
| 11              | 58                | 0.75                        | 236                                | 0.83                  | 0.08                    | 0.92                        |
| 11              | 59                | 0.73                        | 274                                | 0.83                  | 0.07                    | 0.92                        |
| 11              | 60                | 0.72                        | 128                                | 0.82                  | 0.08                    | 0.91                        |
| 11              | 61                | 0.74                        | 288                                | 0.84                  | 0.06                    | 0.92                        |
| 11              | 62                | 0.72                        | 318                                | 0.83                  | 0.06                    | 0.92                        |
| 11              | 63                | 0.73                        | 249                                | 0.83                  | 0.07                    | 0.92                        |
| 11              | 64                | 0.73                        | 269                                | 0.82                  | 0.08                    | 0.91                        |
| 11              | 65                | 0.71                        | 254                                | 0.82                  | 0.07                    | 0.91                        |
| 11              | 66                | 0.73                        | 307                                | 0.83                  | 0.07                    | 0.91                        |
| 11              | 67                | 0.72                        | 348                                | 0.83                  | 0.07                    | 0.92                        |
| 11              | 68                | 0.72                        | 295                                | 0.82                  | 0.07                    | 0.92                        |
| 11              | 69                | 0.71                        | 164                                | 0.82                  | 0.07                    | 0.90                        |
| 11              | 70                | 0.72                        | 321                                | 0.83                  | 0.06                    | 0.92                        |
| 11              | 71                | 0.71                        | 246                                | 0.82                  | 0.07                    | 0.91                        |
| 11              | 72                | 0.72                        | 305                                | 0.83                  | 0.07                    | 0.92                        |
| 11              | 73                | 0.72                        | 336                                | 0.84                  | 0.04                    | 0.92                        |
| 11              | 74                | 0.71                        | 280                                | 0.82                  | 0.06                    | 0.91                        |
| 11              | 75                | 0.70                        | 371                                | 0.83                  | 0.05                    | 0.92                        |
| 11              | 76                | 0.71                        | 170                                | 0.82                  | 0.06                    | 0.91                        |

*Continued on next page*

Table S3 – Continued from previous page

| <b>Fault No</b> | <b>Sample Bin</b> | <b>Fault Detection Rate</b> | <b>Optimal Feature Subset Size</b> | <b>Model Accuracy</b> | <b>False Alarm Rate</b> | <b>Area Under the Curve</b> |
|-----------------|-------------------|-----------------------------|------------------------------------|-----------------------|-------------------------|-----------------------------|
| 11              | 77                | 0.71                        | 327                                | 0.83                  | 0.05                    | 0.92                        |
| 11              | 78                | 0.72                        | 151                                | 0.82                  | 0.07                    | 0.92                        |
| 11              | 79                | 0.72                        | 342                                | 0.83                  | 0.06                    | 0.92                        |
| 11              | 80                | 0.72                        | 276                                | 0.83                  | 0.06                    | 0.92                        |
| 11              | 81                | 0.72                        | 307                                | 0.83                  | 0.07                    | 0.92                        |
| 11              | 82                | 0.73                        | 212                                | 0.83                  | 0.06                    | 0.92                        |
| 11              | 83                | 0.74                        | 336                                | 0.84                  | 0.06                    | 0.93                        |
| 11              | 84                | 0.72                        | 367                                | 0.83                  | 0.06                    | 0.92                        |
| 11              | 85                | 0.72                        | 285                                | 0.83                  | 0.06                    | 0.92                        |
| 11              | 86                | 0.73                        | 406                                | 0.84                  | 0.05                    | 0.93                        |
| 11              | 87                | 0.72                        | 379                                | 0.83                  | 0.05                    | 0.92                        |
| 11              | 88                | 0.71                        | 326                                | 0.83                  | 0.05                    | 0.93                        |
| 11              | 89                | 0.72                        | 302                                | 0.83                  | 0.06                    | 0.92                        |
| 11              | 90                | 0.72                        | 300                                | 0.83                  | 0.06                    | 0.92                        |
| 11              | 91                | 0.72                        | 331                                | 0.83                  | 0.06                    | 0.93                        |
| 11              | 92                | 0.72                        | 362                                | 0.83                  | 0.06                    | 0.93                        |
| 11              | 93                | 0.71                        | 246                                | 0.83                  | 0.05                    | 0.92                        |
| 11              | 94                | 0.72                        | 335                                | 0.83                  | 0.07                    | 0.92                        |
| 11              | 95                | 0.72                        | 323                                | 0.83                  | 0.06                    | 0.92                        |
| 11              | 96                | 0.72                        | 274                                | 0.83                  | 0.05                    | 0.92                        |
| 11              | 97                | 0.71                        | 361                                | 0.83                  | 0.06                    | 0.92                        |
| 11              | 98                | 0.72                        | 378                                | 0.83                  | 0.06                    | 0.92                        |
| 11              | 99                | 0.71                        | 290                                | 0.83                  | 0.05                    | 0.92                        |
| 11              | 100               | 0.71                        | 341                                | 0.83                  | 0.05                    | 0.92                        |
| 11              | 101               | 0.72                        | 263                                | 0.83                  | 0.07                    | 0.92                        |
| 11              | 102               | 0.73                        | 293                                | 0.84                  | 0.05                    | 0.93                        |

*Continued on next page*

Table S3 – *Continued from previous page*

| <b>Fault No</b> | <b>Sample Bin</b> | <b>Fault Detection Rate</b> | <b>Optimal Feature Subset Size</b> | <b>Model Accuracy</b> | <b>False Alarm Rate</b> | <b>Area Under the Curve</b> |
|-----------------|-------------------|-----------------------------|------------------------------------|-----------------------|-------------------------|-----------------------------|
| 11              | 103               | 0.71                        | 359                                | 0.83                  | 0.06                    | 0.92                        |
| 11              | 104               | 0.73                        | 376                                | 0.84                  | 0.05                    | 0.93                        |
| 11              | 105               | 0.74                        | 334                                | 0.84                  | 0.05                    | 0.93                        |
| 11              | 106               | 0.73                        | 462                                | 0.84                  | 0.05                    | 0.93                        |
| 11              | 107               | 0.72                        | 377                                | 0.84                  | 0.05                    | 0.93                        |
| 11              | 108               | 0.73                        | 310                                | 0.84                  | 0.05                    | 0.93                        |
| 11              | 109               | 0.73                        | 381                                | 0.84                  | 0.04                    | 0.93                        |
| 11              | 110               | 0.73                        | 305                                | 0.84                  | 0.04                    | 0.93                        |
| 11              | 111               | 0.73                        | 473                                | 0.84                  | 0.05                    | 0.93                        |
| 11              | 112               | 0.73                        | 498                                | 0.84                  | 0.04                    | 0.94                        |
| 11              | 113               | 0.72                        | 464                                | 0.83                  | 0.05                    | 0.93                        |
| 11              | 114               | 0.73                        | 349                                | 0.84                  | 0.04                    | 0.93                        |
| 11              | 115               | 0.74                        | 310                                | 0.84                  | 0.05                    | 0.93                        |
| 11              | 116               | 0.73                        | 489                                | 0.84                  | 0.04                    | 0.94                        |
| 11              | 117               | 0.74                        | 484                                | 0.85                  | 0.05                    | 0.94                        |
| 11              | 118               | 0.73                        | 512                                | 0.85                  | 0.04                    | 0.94                        |
| 11              | 119               | 0.73                        | 509                                | 0.85                  | 0.03                    | 0.94                        |
| 11              | 120               | 0.74                        | 475                                | 0.85                  | 0.05                    | 0.94                        |
| 12              | 2                 | 0.78                        | 35                                 | 0.84                  | 0.09                    | 0.92                        |
| 12              | 3                 | 0.77                        | 18                                 | 0.60                  | 0.56                    | 0.65                        |
| 12              | 4                 | 0.62                        | 77                                 | 0.71                  | 0.20                    | 0.77                        |
| 12              | 5                 | 0.73                        | 23                                 | 0.82                  | 0.09                    | 0.92                        |
| 12              | 6                 | 0.74                        | 48                                 | 0.82                  | 0.09                    | 0.89                        |
| 12              | 7                 | 0.68                        | 75                                 | 0.81                  | 0.06                    | 0.91                        |
| 12              | 8                 | 0.71                        | 48                                 | 0.80                  | 0.10                    | 0.88                        |
| 12              | 9                 | 0.76                        | 75                                 | 0.83                  | 0.11                    | 0.91                        |

*Continued on next page*

Table S3 – *Continued from previous page*

| <b>Fault No</b> | <b>Sample Bin</b> | <b>Fault Detection Rate</b> | <b>Optimal Feature Subset Size</b> | <b>Model Accuracy</b> | <b>False Alarm Rate</b> | <b>Area Under the Curve</b> |
|-----------------|-------------------|-----------------------------|------------------------------------|-----------------------|-------------------------|-----------------------------|
| 12              | 10                | 0.68                        | 87                                 | 0.79                  | 0.09                    | 0.88                        |
| 12              | 11                | 0.68                        | 103                                | 0.80                  | 0.09                    | 0.90                        |
| 12              | 12                | 0.62                        | 23                                 | 0.78                  | 0.06                    | 0.85                        |
| 12              | 13                | 0.67                        | 118                                | 0.79                  | 0.10                    | 0.89                        |
| 12              | 14                | 0.62                        | 130                                | 0.77                  | 0.08                    | 0.87                        |
| 12              | 15                | 0.64                        | 160                                | 0.77                  | 0.09                    | 0.87                        |
| 12              | 16                | 0.63                        | 50                                 | 0.78                  | 0.08                    | 0.86                        |
| 12              | 17                | 0.64                        | 99                                 | 0.78                  | 0.08                    | 0.87                        |
| 12              | 18                | 0.64                        | 170                                | 0.77                  | 0.10                    | 0.86                        |
| 12              | 19                | 0.63                        | 67                                 | 0.77                  | 0.10                    | 0.86                        |
| 12              | 20                | 0.63                        | 180                                | 0.76                  | 0.11                    | 0.85                        |
| 12              | 21                | 0.65                        | 165                                | 0.77                  | 0.12                    | 0.86                        |
| 12              | 22                | 0.70                        | 152                                | 0.79                  | 0.12                    | 0.87                        |
| 12              | 23                | 0.67                        | 112                                | 0.78                  | 0.11                    | 0.86                        |
| 12              | 24                | 0.71                        | 201                                | 0.77                  | 0.17                    | 0.86                        |
| 12              | 25                | 0.73                        | 233                                | 0.77                  | 0.18                    | 0.87                        |
| 12              | 26                | 0.72                        | 237                                | 0.78                  | 0.16                    | 0.87                        |
| 12              | 27                | 0.73                        | 257                                | 0.79                  | 0.16                    | 0.88                        |
| 12              | 28                | 0.75                        | 151                                | 0.80                  | 0.16                    | 0.88                        |
| 12              | 29                | 0.77                        | 231                                | 0.82                  | 0.13                    | 0.90                        |
| 12              | 30                | 0.78                        | 150                                | 0.81                  | 0.16                    | 0.90                        |
| 12              | 31                | 0.78                        | 201                                | 0.82                  | 0.14                    | 0.91                        |
| 12              | 32                | 0.77                        | 264                                | 0.82                  | 0.13                    | 0.90                        |
| 12              | 33                | 0.78                        | 267                                | 0.82                  | 0.13                    | 0.91                        |
| 12              | 34                | 0.78                        | 246                                | 0.82                  | 0.14                    | 0.91                        |
| 12              | 35                | 0.79                        | 273                                | 0.84                  | 0.11                    | 0.92                        |

*Continued on next page*

Table S3 – *Continued from previous page*

| <b>Fault No</b> | <b>Sample Bin</b> | <b>Fault Detection Rate</b> | <b>Optimal Feature Subset Size</b> | <b>Model Accuracy</b> | <b>False Alarm Rate</b> | <b>Area Under the Curve</b> |
|-----------------|-------------------|-----------------------------|------------------------------------|-----------------------|-------------------------|-----------------------------|
| 12              | 36                | 0.79                        | 242                                | 0.84                  | 0.10                    | 0.92                        |
| 12              | 37                | 0.77                        | 338                                | 0.83                  | 0.11                    | 0.91                        |
| 12              | 38                | 0.77                        | 9                                  | 0.88                  | 0.00                    | 0.95                        |
| 12              | 39                | 0.79                        | 134                                | 0.83                  | 0.13                    | 0.91                        |
| 12              | 40                | 0.71                        | 228                                | 0.81                  | 0.08                    | 0.90                        |
| 12              | 41                | 0.79                        | 209                                | 0.84                  | 0.11                    | 0.92                        |
| 12              | 42                | 0.72                        | 329                                | 0.83                  | 0.07                    | 0.91                        |
| 12              | 43                | 0.72                        | 271                                | 0.82                  | 0.07                    | 0.91                        |
| 12              | 44                | 0.75                        | 7                                  | 0.87                  | 0.00                    | 0.96                        |
| 12              | 45                | 0.73                        | 206                                | 0.83                  | 0.06                    | 0.92                        |
| 12              | 46                | 0.75                        | 3                                  | 0.87                  | 0.00                    | 0.96                        |
| 12              | 47                | 0.73                        | 156                                | 0.82                  | 0.08                    | 0.90                        |
| 12              | 48                | 0.75                        | 10                                 | 0.88                  | 0.00                    | 0.97                        |
| 12              | 49                | 0.76                        | 5                                  | 0.88                  | 0.00                    | 0.96                        |
| 12              | 50                | 0.77                        | 6                                  | 0.89                  | 0.00                    | 0.97                        |
| 12              | 51                | 0.70                        | 306                                | 0.81                  | 0.08                    | 0.90                        |
| 12              | 52                | 0.79                        | 8                                  | 0.89                  | 0.00                    | 0.97                        |
| 12              | 53                | 0.79                        | 1                                  | 0.89                  | 0.00                    | 0.97                        |
| 12              | 54                | 0.80                        | 3                                  | 0.90                  | 0.00                    | 0.97                        |
| 12              | 55                | 0.82                        | 3                                  | 0.91                  | 0.00                    | 0.97                        |
| 12              | 56                | 0.81                        | 6                                  | 0.90                  | 0.00                    | 0.97                        |
| 12              | 57                | 0.79                        | 9                                  | 0.89                  | 0.00                    | 0.97                        |
| 12              | 58                | 0.81                        | 3                                  | 0.90                  | 0.00                    | 0.97                        |
| 12              | 59                | 0.71                        | 324                                | 0.82                  | 0.07                    | 0.91                        |
| 12              | 60                | 0.81                        | 4                                  | 0.91                  | 0.00                    | 0.97                        |
| 12              | 61                | 0.82                        | 2                                  | 0.91                  | 0.00                    | 0.97                        |

*Continued on next page*

Table S3 – *Continued from previous page*

| <b>Fault No</b> | <b>Sample Bin</b> | <b>Fault Detection Rate</b> | <b>Optimal Feature Subset Size</b> | <b>Model Accuracy</b> | <b>False Alarm Rate</b> | <b>Area Under the Curve</b> |
|-----------------|-------------------|-----------------------------|------------------------------------|-----------------------|-------------------------|-----------------------------|
| 12              | 62                | 0.83                        | 2                                  | 0.92                  | 0.00                    | 0.97                        |
| 12              | 63                | 0.73                        | 7                                  | 0.86                  | 0.00                    | 0.98                        |
| 12              | 64                | 0.84                        | 7                                  | 0.92                  | 0.00                    | 0.98                        |
| 12              | 65                | 0.81                        | 6                                  | 0.91                  | 0.00                    | 0.97                        |
| 12              | 66                | 0.73                        | 339                                | 0.83                  | 0.07                    | 0.91                        |
| 12              | 67                | 0.82                        | 5                                  | 0.91                  | 0.00                    | 0.97                        |
| 12              | 68                | 0.85                        | 8                                  | 0.92                  | 0.00                    | 0.99                        |
| 12              | 69                | 0.85                        | 6                                  | 0.92                  | 0.00                    | 0.98                        |
| 12              | 70                | 0.88                        | 3                                  | 0.94                  | 0.00                    | 0.99                        |
| 12              | 71                | 0.90                        | 1                                  | 0.95                  | 0.00                    | 0.99                        |
| 12              | 72                | 0.87                        | 1                                  | 0.93                  | 0.00                    | 0.99                        |
| 12              | 73                | 0.86                        | 3                                  | 0.93                  | 0.00                    | 0.99                        |
| 12              | 74                | 0.89                        | 7                                  | 0.94                  | 0.00                    | 0.99                        |
| 12              | 75                | 0.86                        | 1                                  | 0.93                  | 0.00                    | 0.99                        |
| 12              | 76                | 0.89                        | 3                                  | 0.94                  | 0.00                    | 0.99                        |
| 12              | 77                | 0.83                        | 3                                  | 0.91                  | 0.00                    | 0.98                        |
| 12              | 78                | 0.88                        | 1                                  | 0.94                  | 0.00                    | 0.99                        |
| 12              | 79                | 0.91                        | 6                                  | 0.96                  | 0.00                    | 0.99                        |
| 12              | 80                | 0.90                        | 5                                  | 0.95                  | 0.00                    | 0.99                        |
| 12              | 81                | 0.89                        | 8                                  | 0.95                  | 0.00                    | 0.99                        |
| 12              | 82                | 0.90                        | 3                                  | 0.95                  | 0.00                    | 0.99                        |
| 12              | 83                | 0.89                        | 6                                  | 0.95                  | 0.00                    | 0.99                        |
| 12              | 84                | 0.88                        | 1                                  | 0.94                  | 0.00                    | 0.99                        |
| 12              | 85                | 0.89                        | 11                                 | 0.95                  | 0.00                    | 0.99                        |
| 12              | 86                | 0.89                        | 1                                  | 0.94                  | 0.00                    | 0.99                        |
| 12              | 87                | 0.89                        | 5                                  | 0.94                  | 0.00                    | 0.99                        |

*Continued on next page*



Table S3 – *Continued from previous page*

| <b>Fault No</b> | <b>Sample Bin</b> | <b>Fault Detection Rate</b> | <b>Optimal Feature Subset Size</b> | <b>Model Accuracy</b> | <b>False Alarm Rate</b> | <b>Area Under the Curve</b> |
|-----------------|-------------------|-----------------------------|------------------------------------|-----------------------|-------------------------|-----------------------------|
| 12              | 88                | 0.92                        | 4                                  | 0.96                  | 0.00                    | 0.99                        |
| 12              | 89                | 0.89                        | 9                                  | 0.94                  | 0.00                    | 0.99                        |
| 12              | 90                | 0.89                        | 4                                  | 0.94                  | 0.00                    | 0.99                        |
| 12              | 91                | 0.91                        | 7                                  | 0.95                  | 0.00                    | 0.99                        |
| 12              | 92                | 0.90                        | 6                                  | 0.95                  | 0.00                    | 0.99                        |
| 12              | 93                | 0.90                        | 4                                  | 0.95                  | 0.00                    | 0.99                        |
| 12              | 94                | 0.89                        | 8                                  | 0.95                  | 0.00                    | 0.99                        |
| 12              | 95                | 0.91                        | 4                                  | 0.96                  | 0.00                    | 0.99                        |
| 12              | 96                | 0.90                        | 4                                  | 0.95                  | 0.00                    | 0.99                        |
| 12              | 97                | 0.90                        | 7                                  | 0.95                  | 0.00                    | 0.99                        |
| 12              | 98                | 0.89                        | 1                                  | 0.95                  | 0.00                    | 0.99                        |
| 12              | 99                | 0.91                        | 8                                  | 0.96                  | 0.00                    | 0.99                        |
| 12              | 100               | 0.91                        | 8                                  | 0.95                  | 0.00                    | 0.99                        |
| 12              | 101               | 0.91                        | 9                                  | 0.95                  | 0.00                    | 0.99                        |
| 12              | 102               | 0.90                        | 10                                 | 0.95                  | 0.00                    | 0.99                        |
| 12              | 103               | 0.91                        | 5                                  | 0.96                  | 0.00                    | 0.99                        |
| 12              | 104               | 0.90                        | 3                                  | 0.95                  | 0.00                    | 0.99                        |
| 12              | 105               | 0.90                        | 3                                  | 0.95                  | 0.00                    | 0.99                        |
| 12              | 106               | 0.91                        | 4                                  | 0.96                  | 0.00                    | 0.99                        |
| 12              | 107               | 0.92                        | 4                                  | 0.96                  | 0.00                    | 0.99                        |
| 12              | 108               | 0.92                        | 2                                  | 0.96                  | 0.00                    | 0.99                        |
| 12              | 109               | 0.93                        | 7                                  | 0.97                  | 0.00                    | 1.00                        |
| 12              | 110               | 0.94                        | 4                                  | 0.97                  | 0.00                    | 1.00                        |
| 12              | 111               | 0.92                        | 6                                  | 0.96                  | 0.00                    | 1.00                        |
| 12              | 112               | 0.93                        | 4                                  | 0.96                  | 0.00                    | 1.00                        |
| 12              | 113               | 0.95                        | 1                                  | 0.97                  | 0.00                    | 1.00                        |

*Continued on next page*

Table S3 – *Continued from previous page*

| <b>Fault No</b> | <b>Sample Bin</b> | <b>Fault Detection Rate</b> | <b>Optimal Feature Subset Size</b> | <b>Model Accuracy</b> | <b>False Alarm Rate</b> | <b>Area Under the Curve</b> |
|-----------------|-------------------|-----------------------------|------------------------------------|-----------------------|-------------------------|-----------------------------|
| 12              | 114               | 0.96                        | 7                                  | 0.98                  | 0.00                    | 1.00                        |
| 12              | 115               | 0.96                        | 7                                  | 0.98                  | 0.00                    | 1.00                        |
| 12              | 116               | 0.96                        | 1                                  | 0.98                  | 0.00                    | 1.00                        |
| 12              | 117               | 0.96                        | 2                                  | 0.98                  | 0.00                    | 1.00                        |
| 12              | 118               | 0.97                        | 12                                 | 0.98                  | 0.00                    | 1.00                        |
| 12              | 119               | 0.98                        | 4                                  | 0.99                  | 0.00                    | 1.00                        |
| 12              | 120               | 0.97                        | 1                                  | 0.99                  | 0.00                    | 1.00                        |
| 13              | 2                 | 0.76                        | 6                                  | 0.53                  | 0.70                    | 0.63                        |
| 13              | 3                 | 0.92                        | 92                                 | 0.60                  | 0.73                    | 0.69                        |
| 13              | 4                 | 0.65                        | 236                                | 0.56                  | 0.53                    | 0.56                        |
| 13              | 5                 | 0.64                        | 125                                | 0.58                  | 0.51                    | 0.61                        |
| 13              | 6                 | 0.61                        | 307                                | 0.50                  | 0.61                    | 0.44                        |
| 13              | 7                 | 0.97                        | 7                                  | 0.53                  | 0.91                    | 0.97                        |
| 13              | 8                 | 0.67                        | 2                                  | 0.52                  | 0.63                    | 0.55                        |
| 13              | 9                 | 0.70                        | 25                                 | 0.48                  | 0.74                    | 0.52                        |
| 13              | 10                | 0.62                        | 332                                | 0.51                  | 0.62                    | 0.51                        |
| 13              | 11                | 0.80                        | 29                                 | 0.76                  | 0.28                    | 0.82                        |
| 13              | 12                | 0.66                        | 357                                | 0.53                  | 0.62                    | 0.56                        |
| 13              | 13                | 0.78                        | 58                                 | 0.77                  | 0.23                    | 0.85                        |
| 13              | 14                | 0.84                        | 50                                 | 0.83                  | 0.18                    | 0.91                        |
| 13              | 15                | 0.79                        | 135                                | 0.79                  | 0.20                    | 0.87                        |
| 13              | 16                | 0.78                        | 143                                | 0.80                  | 0.18                    | 0.87                        |
| 13              | 17                | 0.80                        | 98                                 | 0.81                  | 0.17                    | 0.90                        |
| 13              | 18                | 0.84                        | 38                                 | 0.84                  | 0.16                    | 0.92                        |
| 13              | 19                | 0.82                        | 110                                | 0.84                  | 0.14                    | 0.91                        |
| 13              | 20                | 0.82                        | 106                                | 0.84                  | 0.14                    | 0.93                        |

*Continued on next page*

Table S3 – *Continued from previous page*

| <b>Fault No</b> | <b>Sample Bin</b> | <b>Fault Detection Rate</b> | <b>Optimal Feature Subset Size</b> | <b>Model Accuracy</b> | <b>False Alarm Rate</b> | <b>Area Under the Curve</b> |
|-----------------|-------------------|-----------------------------|------------------------------------|-----------------------|-------------------------|-----------------------------|
| 13              | 21                | 0.84                        | 141                                | 0.84                  | 0.15                    | 0.93                        |
| 13              | 22                | 0.82                        | 89                                 | 0.84                  | 0.14                    | 0.92                        |
| 13              | 23                | 0.83                        | 113                                | 0.84                  | 0.15                    | 0.93                        |
| 13              | 24                | 0.82                        | 160                                | 0.82                  | 0.18                    | 0.90                        |
| 13              | 25                | 0.85                        | 137                                | 0.85                  | 0.16                    | 0.93                        |
| 13              | 26                | 0.85                        | 227                                | 0.85                  | 0.15                    | 0.92                        |
| 13              | 27                | 0.83                        | 173                                | 0.84                  | 0.15                    | 0.91                        |
| 13              | 28                | 0.81                        | 213                                | 0.83                  | 0.14                    | 0.91                        |
| 13              | 29                | 0.80                        | 235                                | 0.82                  | 0.16                    | 0.90                        |
| 13              | 30                | 0.79                        | 258                                | 0.81                  | 0.18                    | 0.89                        |
| 13              | 31                | 0.79                        | 163                                | 0.81                  | 0.17                    | 0.89                        |
| 13              | 32                | 0.79                        | 208                                | 0.82                  | 0.16                    | 0.89                        |
| 13              | 33                | 0.80                        | 165                                | 0.82                  | 0.17                    | 0.90                        |
| 13              | 34                | 0.81                        | 164                                | 0.83                  | 0.16                    | 0.90                        |
| 13              | 35                | 0.77                        | 229                                | 0.81                  | 0.15                    | 0.89                        |
| 13              | 36                | 0.83                        | 203                                | 0.86                  | 0.12                    | 0.93                        |
| 13              | 37                | 0.82                        | 154                                | 0.85                  | 0.13                    | 0.93                        |
| 13              | 38                | 0.84                        | 186                                | 0.86                  | 0.12                    | 0.93                        |
| 13              | 39                | 0.84                        | 213                                | 0.87                  | 0.11                    | 0.94                        |
| 13              | 40                | 0.87                        | 344                                | 0.88                  | 0.11                    | 0.95                        |
| 13              | 41                | 0.87                        | 282                                | 0.88                  | 0.11                    | 0.95                        |
| 13              | 42                | 0.85                        | 271                                | 0.87                  | 0.10                    | 0.94                        |
| 13              | 43                | 0.87                        | 337                                | 0.88                  | 0.10                    | 0.95                        |
| 13              | 44                | 0.83                        | 348                                | 0.86                  | 0.11                    | 0.93                        |
| 13              | 45                | 0.84                        | 167                                | 0.87                  | 0.10                    | 0.93                        |
| 13              | 46                | 0.81                        | 303                                | 0.86                  | 0.10                    | 0.93                        |

*Continued on next page*

Table S3 – *Continued from previous page*

| <b>Fault No</b> | <b>Sample Bin</b> | <b>Fault Detection Rate</b> | <b>Optimal Feature Subset Size</b> | <b>Model Accuracy</b> | <b>False Alarm Rate</b> | <b>Area Under the Curve</b> |
|-----------------|-------------------|-----------------------------|------------------------------------|-----------------------|-------------------------|-----------------------------|
| 13              | 47                | 0.81                        | 302                                | 0.85                  | 0.10                    | 0.93                        |
| 13              | 48                | 0.84                        | 236                                | 0.88                  | 0.08                    | 0.95                        |
| 13              | 49                | 0.82                        | 359                                | 0.85                  | 0.11                    | 0.93                        |
| 13              | 50                | 0.81                        | 191                                | 0.85                  | 0.11                    | 0.93                        |
| 13              | 51                | 0.81                        | 342                                | 0.87                  | 0.08                    | 0.94                        |
| 13              | 52                | 0.82                        | 279                                | 0.87                  | 0.09                    | 0.94                        |
| 13              | 53                | 0.84                        | 295                                | 0.88                  | 0.08                    | 0.94                        |
| 13              | 54                | 0.84                        | 242                                | 0.87                  | 0.09                    | 0.94                        |
| 13              | 55                | 0.83                        | 181                                | 0.87                  | 0.09                    | 0.94                        |
| 13              | 56                | 0.83                        | 346                                | 0.87                  | 0.09                    | 0.94                        |
| 13              | 57                | 0.83                        | 396                                | 0.88                  | 0.07                    | 0.95                        |
| 13              | 58                | 0.82                        | 347                                | 0.87                  | 0.07                    | 0.95                        |
| 13              | 59                | 0.83                        | 294                                | 0.88                  | 0.07                    | 0.95                        |
| 13              | 60                | 0.84                        | 335                                | 0.89                  | 0.05                    | 0.96                        |
| 13              | 61                | 0.83                        | 346                                | 0.89                  | 0.06                    | 0.96                        |
| 13              | 62                | 0.84                        | 291                                | 0.89                  | 0.06                    | 0.95                        |
| 13              | 63                | 0.84                        | 281                                | 0.88                  | 0.08                    | 0.95                        |
| 13              | 64                | 0.83                        | 361                                | 0.89                  | 0.05                    | 0.96                        |
| 13              | 65                | 0.83                        | 351                                | 0.89                  | 0.06                    | 0.96                        |
| 13              | 66                | 0.83                        | 358                                | 0.88                  | 0.06                    | 0.96                        |
| 13              | 67                | 0.83                        | 378                                | 0.89                  | 0.05                    | 0.96                        |
| 13              | 68                | 0.86                        | 437                                | 0.90                  | 0.06                    | 0.97                        |
| 13              | 69                | 0.85                        | 475                                | 0.89                  | 0.06                    | 0.96                        |
| 13              | 70                | 0.83                        | 392                                | 0.89                  | 0.06                    | 0.96                        |
| 13              | 71                | 0.84                        | 444                                | 0.90                  | 0.05                    | 0.96                        |
| 13              | 72                | 0.83                        | 354                                | 0.88                  | 0.06                    | 0.96                        |

*Continued on next page*

Table S3 – *Continued from previous page*

| <b>Fault No</b> | <b>Sample Bin</b> | <b>Fault Detection Rate</b> | <b>Optimal Feature Subset Size</b> | <b>Model Accuracy</b> | <b>False Alarm Rate</b> | <b>Area Under the Curve</b> |
|-----------------|-------------------|-----------------------------|------------------------------------|-----------------------|-------------------------|-----------------------------|
| 13              | 73                | 0.84                        | 317                                | 0.89                  | 0.06                    | 0.95                        |
| 13              | 74                | 0.83                        | 325                                | 0.89                  | 0.04                    | 0.96                        |
| 13              | 75                | 0.83                        | 280                                | 0.89                  | 0.06                    | 0.96                        |
| 13              | 76                | 0.83                        | 447                                | 0.89                  | 0.04                    | 0.96                        |
| 13              | 77                | 0.83                        | 327                                | 0.89                  | 0.04                    | 0.96                        |
| 13              | 78                | 0.84                        | 295                                | 0.88                  | 0.07                    | 0.96                        |
| 13              | 79                | 0.83                        | 256                                | 0.88                  | 0.07                    | 0.95                        |
| 13              | 80                | 0.84                        | 357                                | 0.89                  | 0.05                    | 0.96                        |
| 13              | 81                | 0.84                        | 359                                | 0.89                  | 0.05                    | 0.96                        |
| 13              | 82                | 0.84                        | 296                                | 0.89                  | 0.05                    | 0.96                        |
| 13              | 83                | 0.83                        | 252                                | 0.89                  | 0.06                    | 0.95                        |
| 13              | 84                | 0.82                        | 280                                | 0.89                  | 0.05                    | 0.96                        |
| 13              | 85                | 0.84                        | 243                                | 0.89                  | 0.06                    | 0.95                        |
| 13              | 86                | 0.84                        | 307                                | 0.89                  | 0.06                    | 0.96                        |
| 13              | 87                | 0.83                        | 459                                | 0.89                  | 0.04                    | 0.96                        |
| 13              | 88                | 0.83                        | 240                                | 0.89                  | 0.05                    | 0.96                        |
| 13              | 89                | 0.82                        | 280                                | 0.89                  | 0.05                    | 0.96                        |
| 13              | 90                | 0.83                        | 467                                | 0.90                  | 0.04                    | 0.96                        |
| 13              | 91                | 0.83                        | 377                                | 0.89                  | 0.04                    | 0.96                        |
| 13              | 92                | 0.83                        | 401                                | 0.90                  | 0.04                    | 0.96                        |
| 13              | 93                | 0.84                        | 317                                | 0.89                  | 0.07                    | 0.96                        |
| 13              | 94                | 0.82                        | 406                                | 0.89                  | 0.04                    | 0.96                        |
| 13              | 95                | 0.82                        | 426                                | 0.89                  | 0.04                    | 0.96                        |
| 13              | 96                | 0.83                        | 414                                | 0.90                  | 0.03                    | 0.96                        |
| 13              | 97                | 0.82                        | 412                                | 0.89                  | 0.04                    | 0.96                        |
| 13              | 98                | 0.84                        | 372                                | 0.89                  | 0.06                    | 0.96                        |

*Continued on next page*

Table S3 – Continued from previous page

| <b>Fault No</b> | <b>Sample Bin</b> | <b>Fault Detection Rate</b> | <b>Optimal Feature Subset Size</b> | <b>Model Accuracy</b> | <b>False Alarm Rate</b> | <b>Area Under the Curve</b> |
|-----------------|-------------------|-----------------------------|------------------------------------|-----------------------|-------------------------|-----------------------------|
| 13              | 99                | 0.82                        | 500                                | 0.89                  | 0.04                    | 0.96                        |
| 13              | 100               | 0.83                        | 396                                | 0.90                  | 0.04                    | 0.96                        |
| 13              | 101               | 0.81                        | 484                                | 0.88                  | 0.05                    | 0.96                        |
| 13              | 102               | 0.83                        | 370                                | 0.89                  | 0.06                    | 0.96                        |
| 13              | 103               | 0.82                        | 489                                | 0.89                  | 0.04                    | 0.96                        |
| 13              | 104               | 0.82                        | 509                                | 0.89                  | 0.04                    | 0.96                        |
| 13              | 105               | 0.84                        | 408                                | 0.89                  | 0.06                    | 0.96                        |
| 13              | 106               | 0.82                        | 489                                | 0.89                  | 0.04                    | 0.96                        |
| 13              | 107               | 0.83                        | 435                                | 0.90                  | 0.04                    | 0.96                        |
| 13              | 108               | 0.84                        | 345                                | 0.89                  | 0.07                    | 0.95                        |
| 13              | 109               | 0.84                        | 445                                | 0.89                  | 0.05                    | 0.96                        |
| 13              | 110               | 0.85                        | 458                                | 0.90                  | 0.05                    | 0.96                        |
| 13              | 111               | 0.85                        | 415                                | 0.90                  | 0.05                    | 0.96                        |
| 13              | 112               | 0.84                        | 439                                | 0.90                  | 0.03                    | 0.97                        |
| 13              | 113               | 0.84                        | 506                                | 0.90                  | 0.04                    | 0.96                        |
| 13              | 114               | 0.86                        | 435                                | 0.91                  | 0.04                    | 0.97                        |
| 13              | 115               | 0.88                        | 530                                | 0.92                  | 0.04                    | 0.98                        |
| 13              | 116               | 0.89                        | 361                                | 0.92                  | 0.06                    | 0.97                        |
| 13              | 117               | 0.88                        | 617                                | 0.92                  | 0.03                    | 0.98                        |
| 13              | 118               | 0.89                        | 411                                | 0.91                  | 0.06                    | 0.97                        |
| 13              | 119               | 0.89                        | 311                                | 0.92                  | 0.05                    | 0.97                        |
| 13              | 120               | 0.88                        | 616                                | 0.92                  | 0.04                    | 0.98                        |
| 14              | 2                 | 0.63                        | 1                                  | 0.67                  | 0.30                    | 0.71                        |
| 14              | 3                 | 0.58                        | 1                                  | 0.46                  | 0.67                    | 0.41                        |
| 14              | 4                 | 0.62                        | 13                                 | 0.48                  | 0.66                    | 0.69                        |
| 14              | 5                 | 0.91                        | 13                                 | 0.50                  | 0.98                    | 0.99                        |

*Continued on next page*

Table S3 – Continued from previous page

| <b>Fault No</b> | <b>Sample Bin</b> | <b>Fault Detection Rate</b> | <b>Optimal Feature Subset Size</b> | <b>Model Accuracy</b> | <b>False Alarm Rate</b> | <b>Area Under the Curve</b> |
|-----------------|-------------------|-----------------------------|------------------------------------|-----------------------|-------------------------|-----------------------------|
| 14              | 6                 | 0.68                        | 18                                 | 0.52                  | 0.64                    | 0.75                        |
| 14              | 7                 | 0.70                        | 29                                 | 0.69                  | 0.32                    | 0.75                        |
| 14              | 8                 | 0.89                        | 15                                 | 0.50                  | 0.89                    | 0.83                        |
| 14              | 9                 | 0.72                        | 49                                 | 0.71                  | 0.30                    | 0.77                        |
| 14              | 10                | 0.81                        | 1                                  | 0.63                  | 0.56                    | 0.68                        |
| 14              | 11                | 0.78                        | 37                                 | 0.77                  | 0.24                    | 0.84                        |
| 14              | 12                | 0.82                        | 29                                 | 0.81                  | 0.21                    | 0.88                        |
| 14              | 13                | 0.86                        | 103                                | 0.85                  | 0.16                    | 0.92                        |
| 14              | 14                | 0.87                        | 70                                 | 0.86                  | 0.15                    | 0.93                        |
| 14              | 15                | 0.88                        | 129                                | 0.87                  | 0.14                    | 0.95                        |
| 14              | 16                | 0.91                        | 105                                | 0.90                  | 0.11                    | 0.96                        |
| 14              | 17                | 0.89                        | 91                                 | 0.89                  | 0.10                    | 0.96                        |
| 14              | 18                | 0.89                        | 138                                | 0.90                  | 0.10                    | 0.96                        |
| 14              | 19                | 0.87                        | 75                                 | 0.89                  | 0.10                    | 0.96                        |
| 14              | 20                | 0.87                        | 57                                 | 0.89                  | 0.10                    | 0.96                        |
| 14              | 21                | 0.89                        | 119                                | 0.90                  | 0.09                    | 0.96                        |
| 14              | 22                | 0.84                        | 105                                | 0.88                  | 0.08                    | 0.96                        |
| 14              | 23                | 0.82                        | 176                                | 0.86                  | 0.10                    | 0.94                        |
| 14              | 24                | 0.79                        | 181                                | 0.84                  | 0.11                    | 0.92                        |
| 14              | 25                | 0.81                        | 121                                | 0.86                  | 0.09                    | 0.94                        |
| 14              | 26                | 0.83                        | 169                                | 0.86                  | 0.11                    | 0.94                        |
| 14              | 27                | 0.82                        | 222                                | 0.87                  | 0.09                    | 0.93                        |
| 14              | 28                | 0.80                        | 198                                | 0.86                  | 0.09                    | 0.92                        |
| 14              | 29                | 0.83                        | 132                                | 0.88                  | 0.08                    | 0.95                        |
| 14              | 30                | 0.88                        | 158                                | 0.90                  | 0.07                    | 0.97                        |
| 14              | 31                | 0.82                        | 183                                | 0.86                  | 0.10                    | 0.92                        |

*Continued on next page*

Table S3 – *Continued from previous page*

| <b>Fault No</b> | <b>Sample Bin</b> | <b>Fault Detection Rate</b> | <b>Optimal Feature Subset Size</b> | <b>Model Accuracy</b> | <b>False Alarm Rate</b> | <b>Area Under the Curve</b> |
|-----------------|-------------------|-----------------------------|------------------------------------|-----------------------|-------------------------|-----------------------------|
| 14              | 32                | 0.86                        | 189                                | 0.89                  | 0.09                    | 0.95                        |
| 14              | 33                | 0.89                        | 240                                | 0.91                  | 0.07                    | 0.97                        |
| 14              | 34                | 0.90                        | 116                                | 0.93                  | 0.05                    | 0.98                        |
| 14              | 35                | 0.89                        | 108                                | 0.92                  | 0.05                    | 0.98                        |
| 14              | 36                | 0.89                        | 133                                | 0.92                  | 0.04                    | 0.98                        |
| 14              | 37                | 0.85                        | 287                                | 0.90                  | 0.05                    | 0.97                        |
| 14              | 38                | 0.87                        | 228                                | 0.91                  | 0.05                    | 0.97                        |
| 14              | 39                | 0.87                        | 121                                | 0.92                  | 0.03                    | 0.98                        |
| 14              | 40                | 0.87                        | 206                                | 0.92                  | 0.04                    | 0.98                        |
| 14              | 41                | 0.88                        | 342                                | 0.92                  | 0.03                    | 0.97                        |
| 14              | 42                | 0.88                        | 296                                | 0.93                  | 0.03                    | 0.98                        |
| 14              | 43                | 0.89                        | 278                                | 0.93                  | 0.03                    | 0.98                        |
| 14              | 44                | 0.89                        | 180                                | 0.93                  | 0.03                    | 0.98                        |
| 14              | 45                | 0.88                        | 193                                | 0.92                  | 0.04                    | 0.97                        |
| 14              | 46                | 0.87                        | 204                                | 0.92                  | 0.03                    | 0.97                        |
| 14              | 47                | 0.88                        | 199                                | 0.92                  | 0.03                    | 0.98                        |
| 14              | 48                | 0.87                        | 300                                | 0.91                  | 0.05                    | 0.97                        |
| 14              | 49                | 0.87                        | 332                                | 0.92                  | 0.04                    | 0.97                        |
| 14              | 50                | 0.86                        | 431                                | 0.91                  | 0.05                    | 0.96                        |
| 14              | 51                | 0.87                        | 101                                | 0.92                  | 0.03                    | 0.97                        |
| 14              | 52                | 0.86                        | 154                                | 0.91                  | 0.03                    | 0.97                        |
| 14              | 53                | 0.87                        | 346                                | 0.92                  | 0.04                    | 0.97                        |
| 14              | 54                | 0.86                        | 261                                | 0.92                  | 0.03                    | 0.98                        |
| 14              | 55                | 0.87                        | 406                                | 0.91                  | 0.04                    | 0.97                        |
| 14              | 56                | 0.83                        | 324                                | 0.89                  | 0.05                    | 0.95                        |
| 14              | 57                | 0.87                        | 359                                | 0.91                  | 0.05                    | 0.97                        |

*Continued on next page*



Table S3 – *Continued from previous page*

| <b>Fault No</b> | <b>Sample Bin</b> | <b>Fault Detection Rate</b> | <b>Optimal Feature Subset Size</b> | <b>Model Accuracy</b> | <b>False Alarm Rate</b> | <b>Area Under the Curve</b> |
|-----------------|-------------------|-----------------------------|------------------------------------|-----------------------|-------------------------|-----------------------------|
| 14              | 58                | 0.86                        | 231                                | 0.92                  | 0.02                    | 0.97                        |
| 14              | 59                | 0.84                        | 321                                | 0.90                  | 0.05                    | 0.96                        |
| 14              | 60                | 0.84                        | 352                                | 0.89                  | 0.05                    | 0.96                        |
| 14              | 61                | 0.84                        | 278                                | 0.90                  | 0.04                    | 0.95                        |
| 14              | 62                | 0.84                        | 250                                | 0.90                  | 0.05                    | 0.95                        |
| 14              | 63                | 0.85                        | 238                                | 0.91                  | 0.03                    | 0.97                        |
| 14              | 64                | 0.85                        | 159                                | 0.92                  | 0.02                    | 0.97                        |
| 14              | 65                | 0.86                        | 240                                | 0.91                  | 0.03                    | 0.97                        |
| 14              | 66                | 0.85                        | 417                                | 0.91                  | 0.03                    | 0.97                        |
| 14              | 67                | 0.85                        | 407                                | 0.91                  | 0.04                    | 0.96                        |
| 14              | 68                | 0.85                        | 494                                | 0.91                  | 0.04                    | 0.97                        |
| 14              | 69                | 0.84                        | 153                                | 0.91                  | 0.02                    | 0.97                        |
| 14              | 70                | 0.85                        | 370                                | 0.91                  | 0.04                    | 0.97                        |
| 14              | 71                | 0.84                        | 438                                | 0.91                  | 0.02                    | 0.97                        |
| 14              | 72                | 0.85                        | 257                                | 0.91                  | 0.02                    | 0.97                        |
| 14              | 73                | 0.85                        | 323                                | 0.91                  | 0.03                    | 0.97                        |
| 14              | 74                | 0.87                        | 150                                | 0.92                  | 0.04                    | 0.97                        |
| 14              | 75                | 0.85                        | 280                                | 0.91                  | 0.03                    | 0.97                        |
| 14              | 76                | 0.85                        | 300                                | 0.91                  | 0.04                    | 0.97                        |
| 14              | 77                | 0.87                        | 383                                | 0.92                  | 0.03                    | 0.98                        |
| 14              | 78                | 0.88                        | 361                                | 0.93                  | 0.02                    | 0.98                        |
| 14              | 79                | 0.84                        | 271                                | 0.91                  | 0.03                    | 0.97                        |
| 14              | 80                | 0.86                        | 380                                | 0.91                  | 0.03                    | 0.97                        |
| 14              | 81                | 0.84                        | 159                                | 0.91                  | 0.02                    | 0.97                        |
| 14              | 82                | 0.84                        | 448                                | 0.90                  | 0.03                    | 0.96                        |
| 14              | 83                | 0.85                        | 165                                | 0.92                  | 0.01                    | 0.97                        |

*Continued on next page*

Table S3 – *Continued from previous page*

| <b>Fault No</b> | <b>Sample Bin</b> | <b>Fault Detection Rate</b> | <b>Optimal Feature Subset Size</b> | <b>Model Accuracy</b> | <b>False Alarm Rate</b> | <b>Area Under the Curve</b> |
|-----------------|-------------------|-----------------------------|------------------------------------|-----------------------|-------------------------|-----------------------------|
| 14              | 84                | 0.85                        | 482                                | 0.92                  | 0.02                    | 0.98                        |
| 14              | 85                | 0.84                        | 216                                | 0.91                  | 0.01                    | 0.97                        |
| 14              | 86                | 0.85                        | 265                                | 0.91                  | 0.03                    | 0.97                        |
| 14              | 87                | 0.86                        | 442                                | 0.91                  | 0.03                    | 0.97                        |
| 14              | 88                | 0.85                        | 566                                | 0.91                  | 0.03                    | 0.97                        |
| 14              | 89                | 0.84                        | 485                                | 0.91                  | 0.02                    | 0.97                        |
| 14              | 90                | 0.85                        | 421                                | 0.91                  | 0.03                    | 0.97                        |
| 14              | 91                | 0.84                        | 546                                | 0.91                  | 0.02                    | 0.97                        |
| 14              | 92                | 0.84                        | 487                                | 0.91                  | 0.02                    | 0.97                        |
| 14              | 93                | 0.84                        | 18                                 | 0.91                  | 0.01                    | 0.96                        |
| 14              | 94                | 0.84                        | 18                                 | 0.91                  | 0.02                    | 0.96                        |
| 14              | 95                | 0.86                        | 454                                | 0.92                  | 0.02                    | 0.97                        |
| 14              | 96                | 0.85                        | 239                                | 0.92                  | 0.01                    | 0.98                        |
| 14              | 97                | 0.85                        | 433                                | 0.92                  | 0.02                    | 0.97                        |
| 14              | 98                | 0.85                        | 16                                 | 0.91                  | 0.02                    | 0.96                        |
| 14              | 99                | 0.85                        | 359                                | 0.92                  | 0.01                    | 0.98                        |
| 14              | 100               | 0.84                        | 19                                 | 0.91                  | 0.01                    | 0.96                        |
| 14              | 101               | 0.85                        | 512                                | 0.92                  | 0.02                    | 0.97                        |
| 14              | 102               | 0.85                        | 588                                | 0.91                  | 0.03                    | 0.97                        |
| 14              | 103               | 0.84                        | 418                                | 0.91                  | 0.01                    | 0.98                        |
| 14              | 104               | 0.85                        | 448                                | 0.91                  | 0.03                    | 0.97                        |
| 14              | 105               | 0.85                        | 604                                | 0.91                  | 0.03                    | 0.97                        |
| 14              | 106               | 0.85                        | 558                                | 0.91                  | 0.03                    | 0.97                        |
| 14              | 107               | 0.86                        | 466                                | 0.92                  | 0.02                    | 0.97                        |
| 14              | 108               | 0.86                        | 634                                | 0.92                  | 0.02                    | 0.97                        |
| 14              | 109               | 0.86                        | 617                                | 0.92                  | 0.02                    | 0.98                        |

*Continued on next page*

Table S3 – *Continued from previous page*

| <b>Fault No</b> | <b>Sample Bin</b> | <b>Fault Detection Rate</b> | <b>Optimal Feature Subset Size</b> | <b>Model Accuracy</b> | <b>False Alarm Rate</b> | <b>Area Under the Curve</b> |
|-----------------|-------------------|-----------------------------|------------------------------------|-----------------------|-------------------------|-----------------------------|
| 14              | 110               | 0.89                        | 191                                | 0.92                  | 0.04                    | 0.97                        |
| 14              | 111               | 0.88                        | 401                                | 0.93                  | 0.02                    | 0.98                        |
| 14              | 112               | 0.89                        | 181                                | 0.93                  | 0.04                    | 0.97                        |
| 14              | 113               | 0.89                        | 216                                | 0.94                  | 0.02                    | 0.98                        |
| 14              | 114               | 0.89                        | 365                                | 0.93                  | 0.02                    | 0.98                        |
| 14              | 115               | 0.91                        | 311                                | 0.94                  | 0.02                    | 0.98                        |
| 14              | 116               | 0.91                        | 436                                | 0.95                  | 0.02                    | 0.99                        |
| 14              | 117               | 0.90                        | 383                                | 0.95                  | 0.01                    | 0.99                        |
| 14              | 118               | 0.90                        | 394                                | 0.95                  | 0.01                    | 0.99                        |
| 14              | 119               | 0.90                        | 45                                 | 0.94                  | 0.03                    | 0.98                        |
| 14              | 120               | 0.91                        | 558                                | 0.95                  | 0.01                    | 0.99                        |
| 15              | 2                 | 0.72                        | 27                                 | 0.70                  | 0.31                    | 0.76                        |
| 15              | 3                 | 0.85                        | 12                                 | 0.55                  | 0.74                    | 0.60                        |
| 15              | 4                 | 0.85                        | 14                                 | 0.56                  | 0.74                    | 0.57                        |
| 15              | 5                 | 0.80                        | 17                                 | 0.52                  | 0.77                    | 0.92                        |
| 15              | 6                 | 0.56                        | 77                                 | 0.61                  | 0.35                    | 0.65                        |
| 15              | 7                 | 0.76                        | 7                                  | 0.70                  | 0.36                    | 0.77                        |
| 15              | 8                 | 0.64                        | 29                                 | 0.65                  | 0.33                    | 0.71                        |
| 15              | 9                 | 0.79                        | 63                                 | 0.50                  | 0.79                    | 0.51                        |
| 15              | 10                | 0.73                        | 223                                | 0.60                  | 0.52                    | 0.64                        |
| 15              | 11                | 0.94                        | 11                                 | 0.55                  | 0.84                    | 0.89                        |
| 15              | 12                | 0.91                        | 10                                 | 0.54                  | 0.83                    | 0.88                        |
| 15              | 13                | 0.62                        | 193                                | 0.57                  | 0.47                    | 0.62                        |
| 15              | 14                | 0.63                        | 247                                | 0.61                  | 0.41                    | 0.67                        |
| 15              | 15                | 0.49                        | 66                                 | 0.51                  | 0.47                    | 0.52                        |
| 15              | 16                | 0.51                        | 58                                 | 0.53                  | 0.44                    | 0.54                        |

*Continued on next page*

Table S3 – *Continued from previous page*

| <b>Fault No</b> | <b>Sample Bin</b> | <b>Fault Detection Rate</b> | <b>Optimal Feature Subset Size</b> | <b>Model Accuracy</b> | <b>False Alarm Rate</b> | <b>Area Under the Curve</b> |
|-----------------|-------------------|-----------------------------|------------------------------------|-----------------------|-------------------------|-----------------------------|
| 15              | 17                | 0.93                        | 149                                | 0.51                  | 0.92                    | 0.54                        |
| 15              | 18                | 0.75                        | 78                                 | 0.74                  | 0.27                    | 0.81                        |
| 15              | 19                | 0.57                        | 283                                | 0.57                  | 0.44                    | 0.62                        |
| 15              | 20                | 0.66                        | 1                                  | 0.50                  | 1.00                    | 1.00                        |
| 15              | 21                | 0.77                        | 44                                 | 0.74                  | 0.29                    | 0.81                        |
| 15              | 22                | 0.78                        | 148                                | 0.78                  | 0.23                    | 0.85                        |
| 15              | 23                | 0.78                        | 97                                 | 0.79                  | 0.21                    | 0.87                        |
| 15              | 24                | 0.85                        | 158                                | 0.83                  | 0.20                    | 0.89                        |
| 15              | 25                | 0.83                        | 96                                 | 0.84                  | 0.14                    | 0.92                        |
| 15              | 26                | 0.88                        | 196                                | 0.88                  | 0.12                    | 0.95                        |
| 15              | 27                | 0.84                        | 171                                | 0.86                  | 0.12                    | 0.93                        |
| 15              | 28                | 0.87                        | 135                                | 0.88                  | 0.12                    | 0.95                        |
| 15              | 29                | 0.87                        | 93                                 | 0.88                  | 0.11                    | 0.95                        |
| 15              | 30                | 0.89                        | 211                                | 0.91                  | 0.07                    | 0.97                        |
| 15              | 31                | 0.90                        | 98                                 | 0.92                  | 0.05                    | 0.98                        |
| 15              | 32                | 0.88                        | 174                                | 0.92                  | 0.04                    | 0.98                        |
| 15              | 33                | 0.91                        | 216                                | 0.93                  | 0.04                    | 0.98                        |
| 15              | 34                | 0.89                        | 169                                | 0.93                  | 0.03                    | 0.97                        |
| 15              | 35                | 0.92                        | 159                                | 0.94                  | 0.04                    | 0.99                        |
| 15              | 36                | 0.90                        | 223                                | 0.94                  | 0.02                    | 0.99                        |
| 15              | 37                | 0.90                        | 265                                | 0.93                  | 0.03                    | 0.99                        |
| 15              | 38                | 0.93                        | 293                                | 0.96                  | 0.01                    | 0.99                        |
| 15              | 39                | 0.94                        | 254                                | 0.96                  | 0.01                    | 1.00                        |
| 15              | 40                | 0.92                        | 226                                | 0.95                  | 0.02                    | 0.99                        |
| 15              | 41                | 0.92                        | 194                                | 0.95                  | 0.01                    | 0.99                        |
| 15              | 42                | 0.96                        | 225                                | 0.97                  | 0.02                    | 1.00                        |

*Continued on next page*

Table S3 – *Continued from previous page*

| <b>Fault No</b> | <b>Sample Bin</b> | <b>Fault Detection Rate</b> | <b>Optimal Feature Subset Size</b> | <b>Model Accuracy</b> | <b>False Alarm Rate</b> | <b>Area Under the Curve</b> |
|-----------------|-------------------|-----------------------------|------------------------------------|-----------------------|-------------------------|-----------------------------|
| 15              | 43                | 0.96                        | 258                                | 0.98                  | 0.01                    | 1.00                        |
| 15              | 44                | 0.97                        | 312                                | 0.98                  | 0.00                    | 1.00                        |
| 15              | 45                | 0.98                        | 305                                | 0.99                  | 0.00                    | 1.00                        |
| 15              | 46                | 0.97                        | 219                                | 0.98                  | 0.01                    | 1.00                        |
| 15              | 47                | 0.97                        | 274                                | 0.99                  | 0.00                    | 1.00                        |
| 15              | 48                | 0.97                        | 265                                | 0.98                  | 0.01                    | 1.00                        |
| 15              | 49                | 0.99                        | 543                                | 0.99                  | 0.00                    | 1.00                        |
| 15              | 50                | 0.98                        | 458                                | 0.99                  | 0.00                    | 1.00                        |
| 15              | 51                | 0.98                        | 411                                | 0.99                  | 0.00                    | 1.00                        |
| 15              | 52                | 0.98                        | 321                                | 0.99                  | 0.00                    | 1.00                        |
| 15              | 53                | 0.99                        | 368                                | 0.99                  | 0.00                    | 1.00                        |
| 15              | 54                | 0.97                        | 290                                | 0.98                  | 0.00                    | 1.00                        |
| 15              | 55                | 0.98                        | 444                                | 0.99                  | 0.00                    | 1.00                        |
| 15              | 56                | 0.99                        | 463                                | 0.99                  | 0.00                    | 1.00                        |
| 15              | 57                | 0.99                        | 348                                | 0.99                  | 0.00                    | 1.00                        |
| 15              | 58                | 0.99                        | 280                                | 0.99                  | 0.00                    | 1.00                        |
| 15              | 59                | 0.99                        | 248                                | 0.99                  | 0.00                    | 1.00                        |
| 15              | 60                | 0.99                        | 523                                | 0.99                  | 0.00                    | 1.00                        |
| 15              | 61                | 0.98                        | 504                                | 0.99                  | 0.00                    | 1.00                        |
| 15              | 62                | 0.99                        | 428                                | 0.99                  | 0.00                    | 1.00                        |
| 15              | 63                | 0.99                        | 450                                | 1.00                  | 0.00                    | 1.00                        |
| 15              | 64                | 0.99                        | 405                                | 1.00                  | 0.00                    | 1.00                        |
| 15              | 65                | 0.98                        | 506                                | 0.99                  | 0.00                    | 1.00                        |
| 15              | 66                | 0.99                        | 722                                | 1.00                  | 0.00                    | 1.00                        |
| 15              | 67                | 0.99                        | 540                                | 1.00                  | 0.00                    | 1.00                        |
| 15              | 68                | 0.99                        | 425                                | 1.00                  | 0.00                    | 1.00                        |

*Continued on next page*

Table S3 – *Continued from previous page*

| <b>Fault No</b> | <b>Sample Bin</b> | <b>Fault Detection Rate</b> | <b>Optimal Feature Subset Size</b> | <b>Model Accuracy</b> | <b>False Alarm Rate</b> | <b>Area Under the Curve</b> |
|-----------------|-------------------|-----------------------------|------------------------------------|-----------------------|-------------------------|-----------------------------|
| 15              | 69                | 0.99                        | 365                                | 1.00                  | 0.00                    | 1.00                        |
| 15              | 70                | 0.99                        | 593                                | 0.99                  | 0.00                    | 1.00                        |
| 15              | 71                | 0.98                        | 516                                | 0.99                  | 0.00                    | 1.00                        |
| 15              | 72                | 0.99                        | 482                                | 0.99                  | 0.00                    | 1.00                        |
| 15              | 73                | 0.98                        | 405                                | 0.99                  | 0.00                    | 1.00                        |
| 15              | 74                | 0.99                        | 655                                | 0.99                  | 0.00                    | 1.00                        |
| 15              | 75                | 0.99                        | 590                                | 0.99                  | 0.00                    | 1.00                        |
| 15              | 76                | 0.98                        | 777                                | 0.99                  | 0.00                    | 1.00                        |
| 15              | 77                | 0.99                        | 360                                | 0.99                  | 0.00                    | 1.00                        |
| 15              | 78                | 0.99                        | 571                                | 0.99                  | 0.00                    | 1.00                        |
| 15              | 79                | 0.99                        | 409                                | 0.99                  | 0.00                    | 1.00                        |
| 15              | 80                | 0.99                        | 496                                | 1.00                  | 0.00                    | 1.00                        |
| 15              | 81                | 1.00                        | 53                                 | 1.00                  | 0.00                    | 1.00                        |
| 15              | 82                | 0.99                        | 346                                | 1.00                  | 0.00                    | 1.00                        |
| 15              | 83                | 0.98                        | 625                                | 0.99                  | 0.00                    | 1.00                        |
| 15              | 84                | 0.99                        | 565                                | 1.00                  | 0.00                    | 1.00                        |
| 15              | 85                | 0.99                        | 773                                | 1.00                  | 0.00                    | 1.00                        |
| 15              | 86                | 0.99                        | 763                                | 1.00                  | 0.00                    | 1.00                        |
| 15              | 87                | 0.99                        | 810                                | 0.99                  | 0.00                    | 1.00                        |
| 15              | 88                | 0.99                        | 599                                | 0.99                  | 0.00                    | 1.00                        |
| 15              | 89                | 0.99                        | 495                                | 1.00                  | 0.00                    | 1.00                        |
| 15              | 90                | 0.99                        | 469                                | 1.00                  | 0.00                    | 1.00                        |
| 15              | 91                | 0.99                        | 938                                | 0.99                  | 0.00                    | 1.00                        |
| 15              | 92                | 0.99                        | 641                                | 0.99                  | 0.00                    | 1.00                        |
| 15              | 93                | 0.99                        | 655                                | 1.00                  | 0.00                    | 1.00                        |
| 15              | 94                | 0.98                        | 861                                | 0.99                  | 0.00                    | 1.00                        |

*Continued on next page*

Table S3 – *Continued from previous page*

| <b>Fault No</b> | <b>Sample Bin</b> | <b>Fault Detection Rate</b> | <b>Optimal Feature Subset Size</b> | <b>Model Accuracy</b> | <b>False Alarm Rate</b> | <b>Area Under the Curve</b> |
|-----------------|-------------------|-----------------------------|------------------------------------|-----------------------|-------------------------|-----------------------------|
| 15              | 95                | 0.98                        | 785                                | 0.99                  | 0.00                    | 1.00                        |
| 15              | 96                | 0.99                        | 448                                | 0.99                  | 0.00                    | 1.00                        |
| 15              | 97                | 0.99                        | 788                                | 0.99                  | 0.00                    | 1.00                        |
| 15              | 98                | 0.99                        | 717                                | 0.99                  | 0.00                    | 1.00                        |
| 15              | 99                | 0.99                        | 653                                | 0.99                  | 0.00                    | 1.00                        |
| 15              | 100               | 0.99                        | 684                                | 0.99                  | 0.00                    | 1.00                        |
| 15              | 101               | 0.99                        | 672                                | 0.99                  | 0.00                    | 1.00                        |
| 15              | 102               | 0.98                        | 135                                | 0.99                  | 0.00                    | 1.00                        |
| 15              | 103               | 0.99                        | 628                                | 0.99                  | 0.00                    | 1.00                        |
| 15              | 104               | 0.99                        | 721                                | 0.99                  | 0.00                    | 1.00                        |
| 15              | 105               | 0.98                        | 421                                | 0.99                  | 0.00                    | 1.00                        |
| 15              | 106               | 0.99                        | 692                                | 0.99                  | 0.00                    | 1.00                        |
| 15              | 107               | 0.99                        | 722                                | 1.00                  | 0.00                    | 1.00                        |
| 15              | 108               | 1.00                        | 653                                | 1.00                  | 0.00                    | 1.00                        |
| 15              | 109               | 1.00                        | 523                                | 1.00                  | 0.00                    | 1.00                        |
| 15              | 110               | 1.00                        | 575                                | 1.00                  | 0.00                    | 1.00                        |
| 15              | 111               | 1.00                        | 816                                | 1.00                  | 0.00                    | 1.00                        |
| 15              | 112               | 1.00                        | 667                                | 1.00                  | 0.00                    | 1.00                        |
| 15              | 113               | 1.00                        | 917                                | 1.00                  | 0.00                    | 1.00                        |
| 15              | 114               | 1.00                        | 502                                | 1.00                  | 0.00                    | 1.00                        |
| 15              | 115               | 1.00                        | 388                                | 1.00                  | 0.00                    | 1.00                        |
| 15              | 116               | 1.00                        | 235                                | 1.00                  | 0.00                    | 1.00                        |
| 15              | 117               | 1.00                        | 222                                | 1.00                  | 0.00                    | 1.00                        |
| 15              | 118               | 1.00                        | 521                                | 1.00                  | 0.00                    | 1.00                        |
| 15              | 119               | 1.00                        | 235                                | 1.00                  | 0.00                    | 1.00                        |
| 15              | 120               | 1.00                        | 193                                | 1.00                  | 0.00                    | 1.00                        |
